# Supplementary material for: Double-edged sword of interdisciplinary knowledge flow from hard sciences to humanities and social sciences: Evidence from China
Source: PLoS One. 2017 Sep 21;12(9):e0184977. doi: 10.1371/journal.pone.0184977 (PMC5608305; doi:10.1371/journal.pone.0184977)
Supplement: S1 Data — (XLSX) [file pone.0184977.s004.xlsx]

## Sheet: S1_Data
year	stamn	stamp	page	author	keyword	reference	discipline	international	win3all	win3hs	win3hss	attribute	stamp2	selfciting	cattribute	stamn2
2013	18	0.514286	11	3	11	45	social science	1	1	1	0	0	0.26449	0.371429	0	324
2013	9	0.375	11	4	6	28	social science	1	0	0	0	1	0.140625	0.625	0	81
2013	13	0.464286	10	7	0	41	social science	0	1	1	0	1	0.215561	0.5	0	169
2013	19	0.904762	9	10	5	25	social science	1	1	0	1	0	0.818594	0	1	361
2013	1	0.25	3	1	0	5	social science	0	1	0	1	1	0.0625	0.5	1	1
2013	23	0.69697	8	5	4	39	social science	1	0	0	0	0	0.485767	0.212121	0	529
2013	2	0.0952381	12	4	4	25	social science	0	0	0	0	1	0.0090703	0.714286	0	4
2013	20	0.454545	8	5	4	48	social science	1	0	0	0	1	0.206612	0.477273	0	400
2013	11	0.323529	17	3	4	37	social science	0	0	0	0	1	0.104671	0.529412	0	121
2013	9	0.473684	7	3	4	20	social science	0	0	0	0	1	0.224377	0.368421	0	81
2013	4	0.285714	8	3	4	15	social science	0	0	0	0	1	0.0816327	0.714286	0	16
2013	12	0.375	8	3	4	33	social science	0	0	0	0	1	0.140625	0.5625	0	144
2013	15	0.454545	8	6	4	46	social science	0	0	0	0	1	0.206612	0.424242	0	225
2013	7	0.4375	7	7	4	18	social science	1	0	0	0	1	0.191406	0.375	0	49
2013	7	0.7	13	6	0	31	social science	0	0	0	0	0	0.49	0.3	0	49
2013	0	0	18	1	4	39	humanities	0	0	0	0	1	0		0	0
2013	0	0	17	2	5	23	humanities	0	0	0	0	1	0		0	0
2013	0	0	16	1	0	39	humanities	1	0	0	0	1	0	0	0	0
2013	0	0	30	3	0	45	social science	1	2	0	2	1	0	0.75	1	0
2013	25	0.543478	19	2	5	53	social science	1	0	0	0	0	0.295369	0.369565	0	625
2013	0	0	17	1	0	32	social science	0	0	0	0	1	0	1	0	0
2013	6	0.15	31	2	0	53	social science	0	0	0	0	1	0.0225	0.45	0	36
2013	1	0.03125	28	2	0	49	social science	0	0	0	0	1	0.000976563	0.75	0	1
2013	0	0	11	1	0	20	social science	0	0	0	0	1	0	0.2	0	0
2013	15	0.441176	7	4	3	37	social science	0	0	0	0	1	0.194637	0.470588	0	225
2013	0	0	22	3	0	20	social science	1	1	0	1	1	0	1	1	0
2013	3	0.142857	10	3	4	38	social science	1	2	1	1	1	0.0204082	0.809524	0	9
2013	14	0.378378	10	5	0	76	social science	1	2	0	2	1	0.14317	0.594595	1	196
2013	2	0.0740741	15	3	0	35	social science	1	0	0	0	1	0.00548697	0.407407	0	4
2013	0	0	19	2	0	44	social science	1	0	0	0	1	0	0.325	0	0
2013	4	0.2	13	2	0	34	social science	1	0	0	0	1	0.04	0.8	0	16
2013	0	0	13	1	4	22	social science	0	1	1	0	1	0	0.894737	0	0
2013	0	0	18	1	0	44	social science	0	0	0	0	1	0	0.133333	0	0
2013	5	0.172414	7	2	5	45	social science	1	0	0	0	1	0.0297265	0.62069	0	25
2013	0	0	21	3	4	46	social science	1	0	0	0	1	0	0.857143	0	0
2013	14	0.341463	18	4	8	53	social science	1	1	1	0	1	0.116597	0.536585	0	196
2013	4	0.25	24	2	5	26	social science	1	0	0	0	1	0.0625	0.5625	0	16
2013	0	0	23	4	5	31	social science	0	0	0	0	1	0	0	0	0
2013	3	1	9	1	0	9	humanities	0	0	0	0	0	1	0	0	9
2013	1	0.0222222	22	2	4	63	social science	1	0	0	0	1	0.000493827	0.555556	0	1
2013	7	0.5	32	2	7	35	humanities	0	2	1	1	0	0.25	0.214286	0	49
2013	0	0	22	1	0	31	humanities	1	1	0	1	1	0		1	0
2013	0	0	4	3	0	8	humanities	0	1	0	1	1	0		1	0
2013	0	0	6	1	0	9	humanities	0	0	0	0	1	0		0	0
2013	0	0	7	1	0	18	humanities	0	1	0	1	1	0		1	0
2013	1	0.25	6	1	0	15	humanities	0	0	0	0	1	0.0625		0	1
2013	0	0	7	1	0	13	humanities	0	0	0	0	1	0		0	0
2013	13	0.393939	9	6	5	37	social science	0	0	0	0	1	0.155188	0.484849	0	169
2013	1	0.0666667	18	2	4	18	social science	0	0	0	0	1	0.00444444	0.866667	0	1
2013	1	0.0555556	20	4	5	22	social science	0	0	0	0	1	0.00308642	0.833333	0	1
2013	0	0	8	3	0	60	social science	1	0	0	0	1	0	0.3125	0	0
2013	0	0	38	1	0	75	social science	0	0	0	0	1	0	0.4	0	0
2013	0	0	15	1	0	31	humanities	0	1	0	1	1	0		1	0
2013	1	0.0526316	18	1	0	52	humanities	0	0	0	0	1	0.00277008		0	1
2013	4	0.181818	15	2	0	65	humanities	0	0	0	0	1	0.0330579		0	16
2013	0	0	15	1	0	35	humanities	0	0	0	0	1	0		0	0
2013	0	0	4	2	0	4	humanities	0	0	0	0	1	0		0	0
2013	2	0.0740741	11	1	5	40	social science	0	1	0	1	1	0.00548697	0.925926	1	4
2013	0	0	6	2	5	2	social science	1	0	0	0	1	0	1	0	0
2013	16	0.355556	39	3	10	58	social science	1	0	0	0	1	0.12642	0.355556	0	256
2013	7	0.291667	21	2	5	37	social science	1	0	0	0	1	0.0850694	0.666667	0	49
2013	16	0.421053	31	3	10	56	social science	1	0	0	0	1	0.177285	0.394737	0	256
2013	17	0.809524	5	2	2	43	social science	0	0	0	0	0	0.655329	0.0952381	0	289
2013	20	0.8	6	7	6	29	social science	1	0	0	0	0	0.64	0.12	0	400
2013	12	0.342857	12	6	6	54	social science	1	1	0	1	1	0.117551	0.571429	1	144
2013	0	0	9	3	5	36	social science	0	0	0	0	1	0	0.541667	0	0
2013	4	0.105263	13	1	6	52	social science	0	0	0	0	1	0.0110803	0.710526	0	16
2013	12	0.5	15	8	3	49	social science	1	0	0	0	0	0.25	0.458333	0	144
2013	0	0	20	2	0	38	social science	0	0	0	0	1	0	0.848485	0	0
2013	0	0	16	2	4	28	social science	0	0	0	0	1	0	1	0	0
2013	0	0	12	2	3	29	social science	1	0	0	0	1	0	0.952381	0	0
2013	2	0.0769231	23	1	6	37	social science	0	1	1	0	1	0.00591716	0.923077	0	4
2013	0	0	10	2	4	31	social science	0	0	0	0	1	0	0.9375	0	0
2013	12	0.75	11	2	5	22	social science	0	2	1	1	0	0.5625	0.125	0	144
2013	9	0.243243	8	6	8	64	social science	1	0	0	0	1	0.0591673	0.72973	0	81
2013	3	0.176471	8	11	8	39	social science	1	3	0	3	1	0.0311419	0.529412	1	9
2013	4	0.16	7	3	0	27	social science	0	0	0	0	1	0.0256	0	0	16
2013	1	0.166667	7	1	0	32	social science	0	0	0	0	1	0.0277778	0.666667	0	1
2013	5	0.151515	10	7	5	39	social science	1	0	0	0	1	0.0229568	0.757576	0	25
2013	0	0	22	1	5	61	social science	0	0	0	0	1	0	0.956522	0	0
2013	0	0	47	1	0	40	social science	0	0	0	0	1	0	0.909091	0	0
2013	2	0.166667	34	1	0	114	social science	0	0	0	0	1	0.0277778	0.75	0	4
2013	11	0.733333	4	1	3	19	social science	0	0	0	0	0	0.537778	0.266667	0	121
2013	1	0.111111	5	2	4	12	social science	1	0	0	0	1	0.0123457	0.777778	0	1
2013	14	0.388889	18	1	0	51	social science	0	0	0	0	1	0.151235	0.416667	0	196
2013	2	0.25	12	2	5	15	social science	1	1	0	1	1	0.0625	0.125	1	4
2013	1	0.0181818	39	3	0	63	social science	1	0	0	0	1	0.000330578	0.509091	0	1
2013	8	0.266667	20	7	5	39	social science	1	0	0	0	1	0.0711111	0.566667	0	64
2013	3	0.0697674	12	3	3	66	social science	1	1	1	0	1	0.0048675	0.883721	0	9
2013	8	0.470588	8	2	5	44	social science	0	1	1	0	1	0.221453	0.176471	0	64
2013	3	0.75	2	3	0	6	social science	0	1	0	1	0	0.5625	0.25	1	9
2013	12	0.255319	7	2	6	54	social science	1	3	1	2	1	0.0651879	0.361702	1	144
2013	0	0	26	3	0	60	social science	1	0	0	0	1	0	0.394737	0	0
2013	0	0	34	3	0	62	social science	1	0	0	0	1	0	0.84	0	0
2013	2	0.0238095	24	7	5	110	social science	1	0	0	0	1	0.000566893	0.77381	0	4
2013	0	0	11	1	5	19	social science	0	0	0	0	1	0	0.833333	0	0
2013	6	0.111111	10	4	5	78	social science	0	0	0	0	1	0.0123457	0.518519	0	36
2013	0	0	4	3	5	5	social science	1	0	0	0	1	0	1	0	0
2013	1	0.037037	17	2	6	39	social science	1	0	0	0	1	0.00137174	0.925926	0	1
2013	1	0.0588235	15	4	0	30	social science	1	1	0	1	1	0.00346021	0.411765	1	1
2013	0	0	12	2	5	12	social science	1	0	0	0	1	0	0.444444	0	0
2013	0	0	20	4	3	32	social science	0	0	0	0	1	0	0.944444	0	0
2013	13	0.448276	12	4	4	35	social science	1	2	0	2	1	0.200951	0.551724	1	169
2013	0	0	17	1	5	52	social science	0	0	0	0	1	0	0.518519	0	0
2013	0	0	17	1	6	50	social science	0	0	0	0	1	0	0.842105	0	0
2013	1	0.2	23	2	4	11	social science	0	0	0	0	1	0.04	0	0	1
2013	0	0	15	2	5	43	social science	0	0	0	0	1	0	1	0	0
2013	2	0.4	14	3	4	40	social science	0	0	0	0	1	0.16	0.6	0	4
2013	0	0	15	3	5	36	social science	0	0	0	0	1	0	1	0	0
2013	1	0.0277778	17	4	5	63	social science	1	0	0	0	1	0.000771605	0.805556	0	1
2013	0	0	17	4	6	36	social science	0	0	0	0	1	0	0	0	0
2013	0	0	24	1	0	38	social science	0	0	0	0	1	0	0.0909091	0	0
2013	2	0.0645161	20	2	0	45	social science	0	0	0	0	1	0.00416233	0	0	4
2013	0	0	17	2	0	42	social science	1	0	0	0	1	0	1	0	0
2013	3	0.214286	19	3	0	33	social science	0	0	0	0	1	0.0459184	0.357143	0	9
2013	0	0	13	3	0	19	social science	1	0	0	0	1	0	0	0	0
2013	2	0.0952381	17	2	5	34	social science	1	0	0	0	1	0.0090703	0.380952	0	4
2013	0	0	30	4	8	38	social science	1	0	0	0	1	0	1	0	0
2013	2	0.285714	17	1	0	37	social science	0	0	0	0	1	0.0816327	0.571429	0	4
2013	14	0.608696	16	4	7	63	social science	1	1	0	1	0	0.37051	0.26087	1	196
2013	0	0	9	3	5	68	social science	1	1	0	1	1	0	0.655172	1	0
2013	0	0	10	2	7	67	social science	0	0	0	0	1	0	0.912281	0	0
2013	5	0.294118	11	4	4	28	social science	0	0	0	0	1	0.0865052	0.529412	0	25
2013	0	0	10	1	6	63	social science	0	0	0	0	1	0	0.88	0	0
2013	2	0.0487805	11	2	4	66	social science	0	1	0	1	1	0.00237954	0.902439	1	4
2013	3	0.0697674	12	3	8	68	social science	1	0	0	0	1	0.0048675	0.55814	0	9
2013	0	0	9	5	6	62	social science	0	0	0	0	1	0	0.921053	0	0
2013	1	0.037037	8	5	6	39	social science	0	1	0	1	1	0.00137174	0.962963	1	1
2013	0	0	12	2	5	54	social science	1	0	0	0	1	0	0.939394	0	0
2013	1	0.0192308	11	4	5	92	social science	1	1	0	1	1	0.000369823	0.730769	1	1
2013	0	0	15	1	5	27	social science	0	0	0	0	1	0	1	0	0
2013	0	0	14	1	5	28	social science	0	0	0	0	1	0	0.166667	0	0
2013	0	0	17	9	0	79	social science	1	1	0	1	1	0	0.709677	1	0
2013	15	0.882353	6	6	6	35	social science	1	0	0	0	0	0.778547	0.117647	0	225
2013	2	0.0909091	10	2	4	27	social science	1	1	1	0	1	0.00826446	0.681818	0	4
2013	1	0.0232558	10	2	4	47	social science	1	0	0	0	1	0.000540833	0.813953	0	1
2013	0	0	36	3	0	62	social science	0	2	0	2	1	0	0.777778	1	0
2013	0	0	16	1	8	67	humanities	0	0	0	0	1	0		0	0
2013	0	0	2	1	0	1	humanities	0	0	0	0	1	0		0	0
2013	0	0	3	1	0	9	humanities	0	1	0	1	1	0		1	0
2013	0	0	3	1	0	4	humanities	0	0	0	0	1	0		0	0
2013	2	0.666667	3	1	0	4	humanities	0	0	0	0	0	0.444444		0	4
2013	0	0	14	5	4	24	social science	1	0	0	0	1	0	0.833333	0	0
2013	6	0.428571	13	3	5	21	social science	1	2	0	2	1	0.183673	0.285714	1	36
2013	7	0.333333	16	3	4	37	social science	1	1	0	1	1	0.111111	0.52381	1	49
2013	6	1	16	3	5	12	social science	0	1	0	1	0	1	0	1	36
2013	0	0	3	2	0	6	social science	1	1	0	1	1	0	1	1	0
2013	1	0.027027	20	2	4	44	social science	1	3	0	3	1	0.00073046	0.837838	1	1
2013	0	0	14	2	3	26	social science	0	1	0	1	1	0	0.777778	1	0
2013	0	0	12	3	4	23	social science	1	2	0	2	1	0	0.533333	1	0
2013	0	0	16	2	4	32	social science	1	1	0	1	1	0	0.818182	1	0
2013	0	0	14	3	4	28	social science	0	5	0	5	1	0	0.833333	1	0
2013	1	0.333333	25	2	3	44	social science	0	0	0	0	1	0.111111	0	0	1
2013	0	0	32	1	4	107	social science	0	0	0	0	1	0	0.3	0	0
2013	0	0	21	2	6	53	humanities	0	0	0	0	1	0		0	0
2013	0	0	17	3	0	27	social science	1	0	0	0	1	0	0.875	0	0
2013	10	0.588235	8	9	5	31	social science	1	1	0	1	0	0.346021	0.411765	1	100
2013	20	0.769231	8	6	5	38	social science	1	0	0	0	0	0.591716	0.230769	0	400
2013	3	0.176471	10	4	0	25	social science	1	0	0	0	1	0.0311419	0.529412	0	9
2013	1	0.0833333	7	3	0	17	social science	1	0	0	0	1	0.00694444	0.583333	0	1
2013	5	0.172414	9	4	5	39	social science	0	3	1	2	1	0.0297265	0.482759	1	25
2013	0	0	33	2	0	20	social science	1	1	0	1	1	0	0.846154	1	0
2013	0	0	20	3	7	63	social science	1	0	0	0	1	0	0.5	0	0
2013	0	0	24	2	6	78	social science	1	1	0	1	1	0	0.2	1	0
2013	1	0.142857	26	2	7	118	social science	1	1	0	1	1	0.0204082	0.142857	1	1
2013	0	0	29	2	6	151	social science	1	0	0	0	1	0	0.333333	0	0
2013	1	0.047619	32	2	7	111	social science	1	0	0	0	1	0.00226757	0.666667	0	1
2013	0	0	24	2	6	41	social science	1	0	0	0	1	0	1	0	0
2013	2	0.125	7	3	5	31	social science	0	0	0	0	1	0.015625	0.8125	0	4
2013	0	0	3	1	0	8	social science	0	0	0	0	1	0	0.2	0	0
2013	1	0.0833333	29	1	7	68	social science	0	0	0	0	1	0.00694444	0.583333	0	1
2013	0	0	24	3	0	17	social science	0	0	0	0	1	0	1	0	0
2013	0	0	10	3	4	21	social science	1	0	0	0	1	0	1	0	0
2013	5	0.0961538	16	10	5	64	social science	1	1	0	1	1	0.00924556	0.884615	1	25
2013	19	0.404255	12	6	4	49	social science	1	0	0	0	1	0.163422	0.489362	0	361
2013	16	0.470588	9	4	5	38	social science	1	0	0	0	1	0.221453	0.352941	0	256
2013	1	0.05	7	2	3	24	social science	0	0	0	0	1	0.0025	0.9	0	1
2013	0	0	10	5	5	40	social science	1	1	0	1	1	0	0.636364	1	0
2013	1	0.03125	13	5	5	41	social science	0	0	0	0	1	0.000976563	0.78125	0	1
2013	0	0	9	4	5	38	social science	1	1	0	1	1	0	0.956522	1	0
2013	6	0.2	14	4	6	40	social science	1	1	0	1	1	0.04	0.8	1	36
2013	3	0.15	10	5	4	28	social science	1	0	0	0	1	0.0225	0.8	0	9
2013	1	0.0238095	23	2	4	63	social science	1	0	0	0	1	0.000566893	0.952381	0	1
2013	1	0.0454545	11	2	4	38	social science	1	1	0	1	1	0.00206612	0.545455	1	1
2013	9	0.45	11	5	4	26	social science	1	0	0	0	1	0.2025	0.55	0	81
2013	25	1	5	6	0	29	social science	0	2	1	1	0	1	0	0	625
2013	2	0.105263	20	3	0	42	social science	1	0	0	0	1	0.0110803	0.631579	0	4
2013	7	0.291667	7	5	9	32	social science	1	2	1	1	1	0.0850694	0.416667	0	49
2013	1	0.0588235	33	3	7	24	social science	0	0	0	0	1	0.00346021	0.764706	0	1
2013	16	0.8	9	2	3	65	social science	0	0	0	0	0	0.64	0.2	0	256
2013	0	0	10	3	6	32	social science	0	2	2	0	1	0	0.2	0	0
2013	0	0	11	3	5	23	social science	1	0	0	0	1	0	0	0	0
2013	13	0.65	8	3	6	24	social science	0	1	1	0	0	0.4225	0.1	0	169
2013	4	0.125	7	5	7	40	social science	1	4	3	1	1	0.015625	0.84375	0	16
2013	15	0.652174	9	3	4	42	social science	1	0	0	0	0	0.425331	0.347826	0	225
2013	0	0	48	1	4	59	humanities	0	0	0	0	1	0		0	0
2013	0	0	15	5	4	49	social science	0	1	0	1	1	0	0.692308	1	0
2013	0	0	12	2	6	24	social science	0	0	0	0	1	0	0.5	0	0
2013	3	0.115385	9	3	6	42	social science	0	0	0	0	1	0.0133136	0.769231	0	9
2013	5	0.25	9	6	7	36	social science	1	1	1	0	1	0.0625	0.65	0	25
2013	6	0.139535	39	3	6	65	social science	1	1	0	1	1	0.01947	0.767442	1	36
2013	5	0.238095	28	4	6	26	social science	1	0	0	0	1	0.0566893	0.333333	0	25
2013	1	0.0196078	30	3	8	77	social science	1	0	0	0	1	0.000384468	0.607843	0	1
2013	0	0	35	4	4	94	social science	1	1	0	1	1	0	0.928571	1	0
2013	0	0	19	1	6	14	social science	0	0	0	0	1	0	1	0	0
2013	1	0.025	12	3	4	46	social science	0	0	0	0	1	0.000625	0.775	0	1
2013	3	0.06	9	3	6	61	social science	1	0	0	0	1	0.0036	0.84	0	9
2013	1	0.0555556	7	4	6	36	social science	0	0	0	0	1	0.00308642	0.833333	0	1
2013	0	0	22	4	7	53	social science	1	1	0	1	1	0	0.710526	1	0
2013	0	0	17	3	4	69	social science	1	1	0	1	1	0	0.377358	1	0
2013	0	0	27	1	4	76	social science	0	0	0	0	1	0	0.474576	0	0
2013	0	0	23	2	6	75	social science	1	0	0	0	1	0	0.365385	0	0
2013	1	0.0196078	12	52	5	73	social science	1	0	0	0	1	0.000384468	0.921569	0	1
2013	1	0.0188679	14	14	5	59	social science	1	2	0	2	1	0.000355999	0.886792	1	1
2013	1	0.0169492	14	19	6	74	social science	1	2	0	2	1	0.000287274	0.966102	1	1
2013	0	0	20	3	3	37	social science	1	0	0	0	1	0	0.25	0	0
2013	0	0	19	2	3	41	social science	1	0	0	0	1	0	0.947368	0	0
2013	21	0.875	28	1	8	54	humanities	0	0	0	0	0	0.765625	0	0	441
2013	0	0	20	1	10	19	social science	0	0	0	0	1	0	0	0	0
2013	8	0.32	5	5	4	27	social science	0	0	0	0	1	0.1024	0.68	0	64
2013	0	0	19	1	0	33	social science	0	0	0	0	1	0	0.833333	0	0
2013	2	0.166667	14	3	5	44	social science	0	1	0	1	1	0.0277778	0.583333	1	4
2013	9	0.409091	10	3	5	43	social science	0	0	0	0	1	0.167355	0.545455	0	81
2013	0	0	12	4	5	24	social science	1	0	0	0	1	0	0.846154	0	0
2013	0	0	15	4	3	9	social science	1	2	1	1	1	0	0	0	0
2013	0	0	12	3	6	21	social science	1	0	0	0	1	0	1	0	0
2013	1	0.0625	10	3	5	32	social science	0	0	0	0	1	0.00390625	0.8125	0	1
2013	0	0	17	5	5	35	social science	1	0	0	0	1	0	0.941176	0	0
2013	0	0	13	4	3	27	social science	1	0	0	0	1	0	0.9	0	0
2013	1	0.030303	12	2	5	42	social science	0	0	0	0	1	0.000918274	0.848485	0	1
2013	1	0.04	19	2	3	36	social science	0	1	0	1	1	0.0016	0.68	1	1
2013	0	0	11	3	3	30	social science	1	0	0	0	1	0	0.833333	0	0
2013	14	0.254545	15	3	3	83	social science	0	3	0	3	1	0.0647934	0.527273	1	196
2013	5	0.178571	13	4	4	39	social science	1	2	2	0	1	0.0318878	0.821429	0	25
2013	0	0	17	2	3	43	social science	0	0	0	0	1	0	0.888889	0	0
2013	0	0	16	1	4	44	social science	0	0	0	0	1	0	0.9	0	0
2013	13	0.448276	13	5	6	51	social science	1	3	0	3	1	0.200951	0.206897	1	169
2013	0	0	35	1	0	85	social science	0	0	0	0	1	0	1	0	0
2013	16	0.363636	17	3	4	61	social science	0	0	0	0	1	0.132231	0.454545	0	256
2013	1	1	4	2	0	6	social science	1	0	0	0	0	1	0	0	1
2013	1	0.2	18	2	7	39	social science	1	0	0	0	1	0.04	0.8	0	1
2013	23	0.958333	6	6	0	26	social science	0	0	0	0	0	0.918403	0.0416667	0	529
2013	17	0.472222	11	5	7	41	social science	0	3	1	2	1	0.222994	0.444444	1	289
2013	0	0	16	2	5	36	social science	0	0	0	0	1	0	1	0	0
2013	3	0.1	16	3	3	40	social science	1	0	0	0	1	0.01	0.9	0	9
2013	0	0	30	3	0	75	social science	1	0	0	0	1	0	0.9	0	0
2013	20	0.425532	14	3	5	64	social science	0	1	0	1	1	0.181077	0.255319	1	400
2013	0	0	8	3	4	25	social science	1	0	0	0	1	0	0.714286	0	0
2013	3	0.047619	11	4	7	104	social science	1	0	0	0	1	0.00226757	0.634921	0	9
2013	0	0	2	2	6	6	social science	1	1	1	0	1	0	0.4	0	0
2013	0	0	19	1	6	52	social science	0	0	0	0	1	0	0.5	0	0
2013	0	0	20	1	5	31	social science	0	0	0	0	1	0	0.666667	0	0
2013	0	0	11	3	5	28	social science	0	0	0	0	1	0	0.473684	0	0
2013	0	0	18	4	5	61	social science	1	0	0	0	1	0	0.563636	0	0
2013	0	0	15	3	5	36	social science	0	1	0	1	1	0	0.5625	1	0
2013	0	0	12	3	4	54	social science	0	0	0	0	1	0	0.648649	0	0
2013	10	0.344828	14	3	4	35	social science	1	0	0	0	1	0.118906	0.62069	0	100
2013	5	0.185185	23	3	8	51	social science	1	2	1	1	1	0.0342936	0.740741	0	25
2013	0	0	20	2	3	49	social science	1	0	0	0	1	0	0.935484	0	0
2013	0	0	19	1	5	26	social science	0	0	0	0	1	0	0.956522	0	0
2013	15	0.272727	17	3	6	76	social science	0	0	0	0	1	0.0743802	0.636364	0	225
2013	15	0.75	10	2	5	25	social science	0	0	0	0	0	0.5625	0.1	0	225
2013	5	0.416667	7	5	2	26	social science	0	0	0	0	1	0.173611	0.583333	0	25
2013	0	0	18	1	5	28	social science	0	0	0	0	1	0	0.578947	0	0
2013	34	0.918919	10	2	6	52	social science	0	5	5	0	0	0.844412	0.0810811	0	1156
2013	1	0.5	8	2	0	8	humanities	0	0	0	0	0	0.25		0	1
2013	0	0	22	2	6	55	social science	1	0	0	0	1	0	0.285714	0	0
2013	0	0	27	1	4	73	humanities	0	0	0	0	1	0		0	0
2013	14	0.4375	6	4	6	43	social science	0	2	2	0	1	0.191406	0.46875	0	196
2013	19	0.730769	5	6	3	29	social science	1	0	0	0	0	0.534024	0.269231	0	361
2013	9	0.272727	6	6	4	42	social science	1	1	1	0	1	0.0743802	0.666667	0	81
2013	0	0	25	2	5	58	social science	1	0	0	0	1	0	1	0	0
2013	2	0.0416667	26	4	4	98	social science	0	0	0	0	1	0.00173611	0.9375	0	4
2013	0	0	12	2	5	48	social science	1	0	0	0	1	0	0.90625	0	0
2013	0	0	23	3	3	57	social science	0	1	0	1	1	0	0.725	1	0
2013	13	0.333333	15	6	0	53	social science	1	0	0	0	1	0.111111	0.512821	0	169
2013	5	0.111111	30	2	0	58	social science	1	1	0	1	1	0.0123457	0.822222	1	25
2013	30	0.789474	7	6	6	45	social science	1	4	2	2	0	0.623269	0.184211	0	900
2013	10	0.3125	23	2	0	34	social science	0	0	0	0	1	0.0976562	0.65625	0	100
2013	0	0	11	1	4	37	social science	0	0	0	0	1	0	1	0	0
2013	5	0.111111	21	10	4	64	social science	1	0	0	0	1	0.0123457	0.711111	0	25
2013	1	0.0181818	19	3	3	91	social science	1	8	0	8	1	0.000330578	0.927273	1	1
2013	1	0.0175439	15	2	6	74	social science	0	0	0	0	1	0.000307787	0.894737	0	1
2013	0	0	29	1	10	62	social science	0	3	0	3	1	0	0.638298	1	0
2013	3	0.142857	14	3	4	30	social science	1	1	0	1	1	0.0204082	0.619048	1	9
2013	1	0.025	24	3	4	57	social science	1	0	0	0	1	0.000625	0.475	0	1
2013	0	0	22	2	7	61	social science	0	1	0	1	1	0	0.0588235	1	0
2013	0	0	15	2	5	30	social science	1	0	0	0	1	0	0.214286	0	0
2013	0	0	30	2	8	36	social science	1	0	0	0	1	0	1	0	0
2013	2	0.133333	15	1	9	42	social science	0	0	0	0	1	0.0177778	0.733333	0	4
2013	1	0.0454545	15	1	5	39	social science	0	0	0	0	1	0.00206612	0.909091	0	1
2013	1	0.037037	8	5	4	27	social science	1	1	0	1	1	0.00137174	0.814815	1	1
2013	0	0	10	2	3	52	social science	1	0	0	0	1	0	0.297297	0	0
2013	0	0	10	2	3	77	social science	1	2	0	2	1	0	0.220588	1	0
2013	4	0.0430108	10	2	5	106	social science	1	2	0	2	1	0.00184993	0.258065	1	16
2013	9	0.209302	13	2	5	54	social science	1	0	0	0	1	0.0438075	0.44186	0	81
2013	1	0.00558659	14	2	4	188	social science	1	0	0	0	1	3.12e-05	0.312849	0	1
2013	0	0	10	10	5	33	social science	1	3	0	3	1	0	0.464286	1	0
2013	0	0	16	1	5	14	humanities	0	0	0	0	1	0		0	0
2013	0	0	20	1	5	50	humanities	0	0	0	0	1	0		0	0
2013	0	0	19	2	0	26	social science	1	0	0	0	1	0	1	0	0
2013	0	0	36	4	4	52	social science	1	0	0	0	1	0	0.714286	0	0
2013	0	0	23	2	5	39	social science	1	0	0	0	1	0	0.952381	0	0
2013	5	0.172414	12	2	6	83	social science	0	1	0	1	1	0.0297265	0.827586	1	25
2013	2	0.133333	9	3	5	54	social science	1	0	0	0	1	0.0177778	0.866667	0	4
2013	30	0.555556	7	2	7	80	social science	0	0	0	0	0	0.308642	0.277778	0	900
2013	26	0.896552	10	2	3	57	social science	0	2	0	2	0	0.803805	0.103448	1	676
2013	10	0.625	11	4	6	32	social science	1	0	0	0	0	0.390625	0.375	0	100
2013	1	0.0555556	9	2	6	71	social science	1	2	0	2	1	0.00308642	0.777778	1	1
2013	4	0.333333	10	2	4	21	social science	1	0	0	0	1	0.111111	0.583333	0	16
2013	5	0.555556	20	5	8	106	social science	1	0	0	0	0	0.308642	0.444444	0	25
2013	0	0	28	2	6	35	social science	0	0	0	0	1	0	1	0	0
2013	29	0.517857	13	2	7	102	humanities	1	0	0	0	0	0.268176	0.142857	0	841
2013	19	0.730769	6	6	5	26	social science	0	0	0	0	0	0.534024	0.192308	0	361
2013	0	0	6	3	0	20	social science	1	1	0	1	1	0	1	1	0
2013	7	0.411765	13	2	3	27	social science	0	0	0	0	1	0.16955	0.411765	0	49
2013	1	0.0434783	17	4	5	43	social science	0	0	0	0	1	0.00189036	0.304348	0	1
2013	0	0	19	4	6	19	social science	0	0	0	0	1	0	1	0	0
2013	0	0	21	3	3	61	social science	0	0	0	0	1	0	0.659574	0	0
2013	0	0	22	1	6	46	social science	0	0	0	0	1	0	0.473684	0	0
2013	4	0.8	16	4	5	24	social science	0	0	0	0	0	0.64	0.2	0	16
2013	8	0.8	17	2	5	29	social science	0	0	0	0	0	0.64	0.2	0	64
2013	1	0.0263158	9	3	7	48	social science	1	0	0	0	1	0.000692521	0.631579	0	1
2013	1	0.05	8	5	6	37	social science	1	0	0	0	1	0.0025	0.55	0	1
2013	1	0.111111	14	1	3	36	social science	0	0	0	0	1	0.0123457	0.444444	0	1
2013	1	0.0113636	28	5	6	114	social science	0	0	0	0	1	0.000129132	0.954545	0	1
2013	1	0.025	13	3	6	65	humanities	0	0	0	0	1	0.000625		0	1
2013	6	0.545455	5	4	0	16	social science	1	1	1	0	0	0.297521	0.454545	0	36
2013	2	0.125	14	5	4	42	social science	1	0	0	0	1	0.015625	0.625	0	4
2013	21	0.617647	8	6	6	42	social science	0	1	1	0	0	0.381488	0.176471	0	441
2013	5	0.147059	7	1	5	44	social science	0	0	0	0	1	0.0216263	0.823529	0	25
2013	12	0.26087	19	2	5	65	social science	1	0	0	0	1	0.0680529	0.5	0	144
2013	15	0.75	23	4	4	37	social science	1	1	0	1	0	0.5625	0.25	1	225
2013	4	0.307692	11	4	4	19	social science	0	0	0	0	1	0.0946746	0.692308	0	16
2013	17	0.68	8	5	3	35	social science	1	0	0	0	0	0.4624	0.32	0	289
2013	17	0.772727	7	5	6	30	social science	1	1	1	0	0	0.597107	0.227273	0	289
2013	0	0	28	4	8	140	social science	1	3	0	3	1	0	0.881579	1	0
2013	1	0.0128205	28	3	3	97	social science	1	0	0	0	1	0.000164366	0.730769	0	1
2013	0	0	10	3	4	22	social science	0	1	0	1	1	0	1	1	0
2013	0	0	29	2	5	122	social science	1	2	0	2	1	0	0.988506	1	0
2013	1	0.0175439	24	3	5	67	social science	1	0	0	0	1	0.000307787	0.912281	0	1
2013	0	0	22	2	8	74	social science	0	0	0	0	1	0	0.941176	0	0
2013	1	0.0188679	34	3	5	95	social science	0	0	0	0	1	0.000355999	0.773585	0	1
2013	10	0.116279	18	2	5	116	social science	0	3	1	2	1	0.0135208	0.395349	1	100
2013	11	0.392857	22	2	5	35	social science	0	1	1	0	1	0.154337	0.5	0	121
2013	14	0.4	24	5	7	43	social science	0	2	1	1	1	0.16	0.6	0	196
2013	0	0	19	1	7	25	social science	0	0	0	0	1	0	1	0	0
2013	1	0.125	13	2	4	28	social science	0	0	0	0	1	0.015625	0.5	0	1
2013	0	0	18	2	6	26	social science	1	0	0	0	1	0	1	0	0
2013	8	0.615385	8	5	5	14	social science	1	0	0	0	0	0.378698	0.384615	0	64
2013	7	0.875	9	3	6	35	social science	0	1	1	0	0	0.765625	0	0	49
2013	2	0.133333	11	1	0	43	social science	0	0	0	0	1	0.0177778	0.266667	0	4
2013	16	0.592593	7	7	0	30	social science	1	1	0	1	0	0.351166	0.37037	1	256
2013	0	0	42	3	0	46	social science	1	2	0	2	1	0	0.642857	1	0
2013	0	0	33	3	6	139	social science	1	3	0	3	1	0	0.929825	1	0
2013	20	0.540541	7	2	0	49	social science	1	0	0	0	0	0.292184	0.459459	0	400
2013	1	0.027027	11	3	3	47	social science	1	0	0	0	1	0.00073046	0.918919	0	1
2013	0	0	9	1	0	15	social science	0	1	0	1	1	0	1	1	0
2013	0	0	2	1	0	4	humanities	0	0	0	0	1	0		0	0
2013	0	0	6	10	3	15	social science	1	0	0	0	1	0	1	0	0
2013	20	0.25	21	8	5	126	social science	1	2	1	1	1	0.0625	0.7	0	400
2013	0	0	24	3	6	60	social science	1	0	0	0	1	0	0.933333	0	0
2013	0	0	13	7	7	21	social science	0	0	0	0	1	0	1	0	0
2013	2	0.181818	14	4	6	38	social science	1	0	0	0	1	0.0330579	0.818182	0	4
2013	3	0.1875	16	2	5	50	social science	1	0	0	0	1	0.0351562	0.6875	0	9
2013	0	0	4	1	0	17	social science	0	0	0	0	1	0	0.5	0	0
2013	1	0.0625	22	1	7	51	humanities	0	0	0	0	1	0.00390625		0	1
2013	0	0	8	3	6	18	social science	1	1	0	1	1	0	0.444444	1	0
2013	1	0.0714286	16	1	5	72	social science	0	0	0	0	1	0.00510204	0.928571	0	1
2013	6	0.171429	10	3	4	42	social science	0	2	0	2	1	0.0293878	0.0571429	1	36
2013	5	0.0862069	19	3	7	73	social science	1	1	0	1	1	0.00743163	0.741379	1	25
2013	5	0.116279	9	3	5	49	social science	0	2	0	2	1	0.0135208	0.0930233	1	25
2013	10	0.185185	27	2	6	69	social science	0	2	0	2	1	0.0342936	0.351852	1	100
2013	1	0.0285714	15	3	6	44	social science	0	0	0	0	1	0.000816327	0.285714	0	1
2013	3	0.107143	9	2	4	33	social science	0	2	0	2	1	0.0114796	0.0714286	1	9
2013	3	0.0714286	19	2	0	56	social science	0	1	0	1	1	0.00510204	0.785714	1	9
2013	1	0.05	16	1	7	55	social science	0	1	0	1	1	0.0025	0.15	1	1
2013	0	0	6	2	5	48	social science	0	1	0	1	1	0	0.947368	1	0
2013	0	0	8	2	5	54	social science	1	1	0	1	1	0	0.861111	1	0
2013	1	0.047619	7	4	4	32	social science	0	1	0	1	1	0.00226757	0.571429	1	1
2013	2	0.0833333	7	3	6	34	social science	1	1	0	1	1	0.00694444	0.208333	1	4
2013	0	0	6	4	5	55	social science	0	1	0	1	1	0	0.674419	1	0
2013	3	0.0666667	7	4	4	60	social science	0	1	0	1	1	0.00444444	0.777778	1	9
2013	3	0.115385	6	4	6	37	social science	0	1	0	1	1	0.0133136	0.807692	1	9
2013	1	0.037037	6	3	4	31	social science	1	1	0	1	1	0.00137174	0.851852	1	1
2013	0	0	6	3	5	73	social science	0	1	0	1	1	0	0.982759	1	0
2013	0	0	7	3	5	37	social science	0	1	0	1	1	0	0.913044	1	0
2013	4	0.125	8	5	5	36	social science	1	1	0	1	1	0.015625	0.8125	1	16
2013	0	0	7	4	6	47	social science	0	1	0	1	1	0	0.955556	1	0
2013	8	0.25	7	5	7	41	social science	1	1	0	1	1	0.0625	0.46875	1	64
2013	0	0	7	2	6	64	social science	0	1	0	1	1	0	0.927273	1	0
2013	0	0	7	5	6	46	social science	1	3	0	3	1	0	0.65	1	0
2013	15	0.625	22	20	10	30	social science	1	10	9	1	0	0.390625	0.375	0	225
2013	0	0	39	4	0	129	social science	1	3	0	3	1	0	0.78	1	0
2013	5	0.3125	14	5	4	25	social science	0	2	1	1	1	0.0976562	0.625	0	25
2013	0	0	14	3	6	54	social science	1	0	0	0	1	0	0.5	0	0
2013	0	0	36	3	0	71	social science	1	3	0	3	1	0	1	1	0
2013	0	0	16	1	6	24	social science	0	0	0	0	1	0	1	0	0
2013	8	0.242424	9	6	6	36	social science	0	1	1	0	1	0.0587695	0.0909091	0	64
2013	0	0	9	3	7	16	social science	1	1	0	1	1	0	0	1	0
2013	0	0	16	2	4	76	social science	1	0	0	0	1	0	0.559322	0	0
2013	2	0.0645161	19	1	3	55	social science	0	1	0	1	1	0.00416233	0.580645	1	4
2013	7	0.4375	24	3	0	26	social science	0	0	0	0	1	0.191406	0.4375	0	49
2013	1	0.037037	24	4	0	34	social science	0	2	0	2	1	0.00137174	0.518519	1	1
2013	1	0.25	6	1	0	5	social science	0	0	0	0	1	0.0625	0.5	0	1
2013	2	0.133333	13	1	4	43	social science	0	0	0	0	1	0.0177778	0.0666667	0	4
2013	0	0	16	3	4	18	social science	1	0	0	0	1	0	0.833333	0	0
2013	0	0	6	3	7	7	social science	0	0	0	0	1	0	1	0	0
2013	9	0.75	15	4	4	21	social science	0	0	0	0	0	0.5625	0.25	0	81
2013	0	0	13	3	0	32	social science	1	3	0	3	1	0	0.625	1	0
2013	0	0	21	4	5	70	social science	0	1	0	1	1	0	0.795918	1	0
2013	4	0.0212766	32	2	4	216	social science	1	1	0	1	1	0.000452693	0.68617	1	16
2013	3	0.075	31	2	0	44	social science	1	0	0	0	1	0.005625	0.9	0	9
2013	0	0	20	2	4	15	social science	0	0	0	0	1	0	1	0	0
2013	0	0	14	2	5	126	social science	1	1	1	0	1	0	0.92233	0	0
2013	0	0	13	4	5	77	social science	1	0	0	0	1	0	0.672131	0	0
2013	4	0.121212	9	4	4	41	social science	1	1	0	1	1	0.0146924	0.545455	1	16
2013	0	0	11	4	5	18	social science	1	2	1	1	1	0	0.9375	0	0
2013	3	0.111111	35	3	0	41	social science	0	1	0	1	1	0.0123457	0.407407	1	9
2013	21	0.636364	16	2	9	35	social science	0	9	9	0	0	0.404959	0.272727	0	441
2013	0	0	21	3	0	16	social science	1	0	0	0	1	0	1	0	0
2013	1	0.0454545	25	3	0	35	social science	1	0	0	0	1	0.00206612	0.818182	0	1
2013	1	0.04	14	2	5	32	social science	1	2	0	2	1	0.0016	0.8	1	1
2013	27	0.457627	16	2	4	76	social science	1	1	0	1	1	0.209423	0.542373	1	729
2013	2	0.133333	16	6	5	26	social science	0	0	0	0	1	0.0177778	0.8	0	4
2013	0	0	12	2	0	14	social science	1	2	0	2	1	0	1	1	0
2013	1	0.125	13	3	0	18	social science	1	0	0	0	1	0.015625	0.375	0	1
2013	1	0.05	16	2	0	34	social science	1	0	0	0	1	0.0025	0.5	0	1
2013	5	0.25	16	3	0	32	social science	1	0	0	0	1	0.0625	0.7	0	25
2013	0	0	6	2	5	14	social science	1	0	0	0	1	0	0.875	0	0
2013	4	0.117647	13	2	6	49	social science	0	0	0	0	1	0.0138408	0.764706	0	16
2013	2	0.0689655	11	3	5	38	social science	0	0	0	0	1	0.00475624	0.896552	0	4
2013	3	0.06	19	2	5	68	social science	0	0	0	0	1	0.0036	0.86	0	9
2013	0	0	12	3	6	47	social science	1	0	0	0	1	0	0.888889	0	0
2013	0	0	18	2	5	26	social science	1	1	1	0	1	0	0.956522	0	0
2013	2	0.0571429	19	4	5	51	social science	0	0	0	0	1	0.00326531	0.771429	0	4
2013	10	0.833333	10	6	6	24	social science	1	0	0	0	0	0.694444	0.166667	0	100
2013	6	0.24	12	4	5	39	social science	0	0	0	0	1	0.0576	0.24	0	36
2013	29	0.783784	11	2	5	43	social science	0	8	7	1	0	0.614317	0.189189	0	841
2013	22	0.578947	21	4	5	68	social science	0	0	0	0	0	0.33518	0.394737	0	484
2013	2	0.666667	8	4	4	14	social science	1	1	0	1	0	0.444444	0.333333	1	4
2013	16	0.444444	10	8	0	47	social science	0	0	0	0	1	0.197531	0.388889	0	256
2013	0	0	16	1	3	27	social science	0	0	0	0	1	0	1	0	0
2013	0	0	23	4	5	22	social science	1	0	0	0	1	0	0.941176	0	0
2013	0	0	15	3	7	15	social science	1	1	0	1	1	0	1	1	0
2013	2	0.125	12	2	6	21	social science	1	0	0	0	1	0.015625	0.75	0	4
2013	4	0.121212	15	2	6	45	social science	0	0	0	0	1	0.0146924	0.848485	0	16
2013	1	0.0555556	15	2	3	26	social science	0	0	0	0	1	0.00308642	0.333333	0	1
2013	0	0	7	2	3	31	social science	0	7	0	7	1	0	0	1	0
2013	4	0.266667	19	11	4	34	social science	1	0	0	0	1	0.0711111	0.733333	0	16
2013	0	0	13	1	0	44	social science	0	0	0	0	1	0	0.875	0	0
2013	3	0.0909091	13	4	0	49	social science	1	0	0	0	1	0.00826446	0.818182	0	9
2013	1	0.0454545	13	4	0	32	social science	0	0	0	0	1	0.00206612	0.909091	0	1
2013	0	0	2	1	0	1	social science	0	0	0	0	1	0	0	0	0
2013	7	0.5	10	7	6	27	social science	0	0	0	0	0	0.25	0.428571	0	49
2013	23	0.793103	10	3	8	40	social science	0	0	0	0	0	0.629013	0.206897	0	529
2013	1	0.0666667	15	3	7	24	social science	0	0	0	0	1	0.00444444	0.933333	0	1
2013	2	0.0625	21	3	8	46	social science	0	0	0	0	1	0.00390625	0.84375	0	4
2013	0	0	21	2	8	38	social science	0	0	0	0	1	0	0.666667	0	0
2013	0	0	21	3	4	25	social science	0	0	0	0	1	0	0.3	0	0
2013	2	0.133333	7	3	6	25	social science	1	1	0	1	1	0.0177778	0.8	1	4
2013	0	0	5	1	0	6	social science	1	0	0	0	1	0	1	0	0
2013	8	0.615385	35	2	7	102	social science	1	1	1	0	0	0.378698	0.384615	0	64
2013	8	0.4	26	4	7	51	social science	1	0	0	0	1	0.16	0.6	0	64
2013	25	0.806452	5	2	6	42	social science	1	0	0	0	0	0.650364	0.129032	0	625
2013	41	0.97619	8	3	4	48	social science	1	0	0	0	0	0.952948	0.0238095	0	1681
2013	2	0.1	12	1	6	42	social science	0	1	0	1	1	0.01	0.8	1	4
2013	1	0.04	23	3	4	58	social science	1	1	0	1	1	0.0016	0.72	1	1
2013	3	0.0625	20	3	4	78	social science	0	1	0	1	1	0.00390625	0.645833	1	9
2013	10	0.4	10	3	5	40	social science	0	2	2	0	1	0.16	0.12	0	100
2013	1	0.166667	14	4	3	18	social science	1	1	0	1	1	0.0277778	0.666667	1	1
2013	0	0	11	3	6	28	social science	1	0	0	0	1	0	1	0	0
2013	4	0.181818	14	3	5	59	social science	1	0	0	0	1	0.0330579	0.818182	0	16
2013	0	0	27	2	3	108	social science	0	0	0	0	1	0	0.833333	0	0
2013	0	0	18	1	5	67	social science	1	0	0	0	1	0	0.727273	0	0
2013	1	0.0243902	32	1	7	143	social science	1	0	0	0	1	0.000594884	0.487805	0	1
2013	12	0.181818	28	5	6	184	social science	0	0	0	0	1	0.0330579	0.545455	0	144
2013	11	0.203704	12	3	3	72	social science	1	1	0	1	1	0.0414952	0.703704	1	121
2013	0	0	16	4	5	50	social science	1	0	0	0	1	0	0.368421	0	0
2013	1	0.03125	17	2	5	43	social science	1	2	0	2	1	0.000976563	0.59375	1	1
2013	0	0	23	4	4	38	social science	1	0	0	0	1	0	0.758621	0	0
2013	0	0	21	3	4	29	social science	0	1	0	1	1	0	0.517241	1	0
2013	0	0	21	3	3	28	social science	1	0	0	0	1	0	0.478261	0	0
2013	14	0.875	11	6	0	29	social science	1	1	1	0	0	0.765625	0.125	0	196
2013	3	0.0967742	12	2	6	49	social science	0	0	0	0	1	0.00936524	0.548387	0	9
2013	0	0	23	2	5	19	social science	0	0	0	0	1	0	1	0	0
2013	6	0.176471	14	4	5	37	social science	1	1	1	0	1	0.0311419	0.823529	0	36
2013	37	0.660714	16	7	7	67	social science	1	1	0	1	0	0.436543	0.321429	1	1369
2013	0	0	4	2	0	17	social science	0	5	0	5	1	0	1	1	0
2013	10	0.277778	10	3	6	51	social science	1	2	2	0	1	0.0771605	0.694444	0	100
2013	5	0.384615	9	2	3	17	social science	0	2	2	0	1	0.147929	0.461538	0	25
2013	4	0.137931	9	3	6	36	social science	1	1	1	0	1	0.019025	0.827586	0	16
2013	4	0.153846	10	3	6	36	social science	1	0	0	0	1	0.0236686	0.807692	0	16
2013	5	0.125	10	3	4	46	social science	0	0	0	0	1	0.015625	0.55	0	25
2013	30	0.588235	11	3	6	62	social science	0	6	5	1	0	0.346021	0.411765	0	900
2013	21	0.724138	16	3	6	37	social science	0	0	0	0	0	0.524376	0.172414	0	441
2013	4	0.16	10	2	4	35	social science	1	1	1	0	1	0.0256	0.68	0	16
2013	12	0.375	11	3	3	41	social science	1	0	0	0	1	0.140625	0.5625	0	144
2013	9	0.428571	8	2	5	28	social science	0	3	3	0	1	0.183673	0.52381	0	81
2013	18	0.4	11	2	6	53	social science	1	10	9	1	1	0.16	0.488889	0	324
2013	11	0.392857	9	2	3	42	social science	1	2	1	1	1	0.154337	0.464286	0	121
2013	9	0.264706	8	1	3	40	social science	0	0	0	0	1	0.0700692	0.676471	0	81
2013	10	0.416667	15	4	4	52	social science	1	1	1	0	1	0.173611	0.541667	0	100
2013	23	0.45098	9	3	5	57	social science	0	4	4	0	1	0.203383	0.352941	0	529
2013	9	0.375	9	3	4	35	social science	0	0	0	0	1	0.140625	0.625	0	81
2013	3	0.2	7	1	3	18	social science	0	1	0	1	1	0.04	0.666667	1	9
2013	6	0.157895	16	3	5	52	social science	0	2	0	2	1	0.0249307	0.552632	1	36
2013	19	0.678571	9	1	4	31	social science	0	1	1	0	0	0.460459	0.321429	0	361
2013	0	0	12	1	2	10	social science	0	0	0	0	1	0	0.8	0	0
2013	1	0.0333333	15	4	4	37	social science	1	0	0	0	1	0.00111111	0.933333	0	1
2013	4	0.102564	14	10	6	71	social science	1	0	0	0	1	0.0105194	0.435897	0	16
2013	13	0.5	20	4	5	38	social science	1	0	0	0	0	0.25	0.5	0	169
2013	14	0.666667	21	4	5	42	social science	1	1	1	0	0	0.444444	0.285714	0	196
2013	0	0	15	1	5	28	social science	1	0	0	0	1	0	0.941176	0	0
2013	8	0.888889	21	4	0	44	social science	0	0	0	0	0	0.790123	0.111111	0	64
2013	4	0.142857	9	3	0	43	social science	1	1	0	1	1	0.0204082	0.75	1	16
2013	21	0.35	17	3	0	103	social science	0	0	0	0	1	0.1225	0.566667	0	441
2013	6	0.545455	14	5	0	16	social science	1	5	2	3	0	0.297521	0.454545	1	36
2013	0	0	12	3	0	23	social science	1	0	0	0	1	0	0.6	0	0
2013	20	0.769231	13	1	0	37	social science	0	0	0	0	0	0.591716	0.192308	0	400
2013	2	0.2	4	2	3	13	social science	0	0	0	0	1	0.04	0.4	0	4
2013	0	0	13	3	6	43	social science	1	1	0	1	1	0	0.958333	1	0
2013	12	0.4	11	5	8	41	social science	0	0	0	0	1	0.16	0.533333	0	144
2013	3	0.176471	18	2	0	24	social science	1	1	1	0	1	0.0311419	0.764706	0	9
2013	13	0.382353	8	3	5	46	social science	0	0	0	0	1	0.146194	0.5	0	169
2013	0	0	9	3	6	17	social science	1	0	0	0	1	0	1	0	0
2013	4	0.16	27	4	5	40	social science	1	0	0	0	1	0.0256	0.76	0	16
2013	10	0.285714	22	2	7	40	social science	0	0	0	0	1	0.0816327	0.714286	0	100
2013	1	0.0222222	29	4	4	55	social science	1	0	0	0	1	0.000493827	0.444444	0	1
2013	0	0	13	5	6	66	social science	1	0	0	0	1	0	0.475	0	0
2013	0	0	1	4	0	1	social science	0	0	0	0	1	0	1	0	0
2013	10	0.526316	15	5	5	21	social science	0	0	0	0	0	0.277008	0.473684	0	100
2013	0	0	16	3	0	26	social science	1	0	0	0	1	0	0.954545	0	0
2013	0	0	8	2	0	21	social science	1	0	0	0	1	0	1	0	0
2013	0	0	12	1	0	20	social science	0	2	0	2	1	0	1	1	0
2013	11	0.611111	5	8	5	27	social science	1	2	2	0	0	0.373457	0.388889	0	121
2013	32	0.52459	8	9	6	75	social science	1	4	1	3	0	0.275195	0.278689	1	1024
2013	25	0.735294	6	2	1	41	social science	1	4	2	2	0	0.540657	0.176471	0	625
2013	9	0.75	17	5	6	37	social science	1	0	0	0	0	0.5625	0.25	0	81
2013	0	0	17	2	4	22	social science	0	0	0	0	1	0	0.882353	0	0
2013	0	0	28	4	3	32	social science	1	0	0	0	1	0	0.793103	0	0
2013	0	0	36	2	5	15	social science	1	0	0	0	1	0	0.571429	0	0
2013	0	0	9	3	3	6	social science	1	0	0	0	1	0	0.75	0	0
2013	0	0	20	3	2	23	social science	1	0	0	0	1	0	0.923077	0	0
2013	0	0	17	1	3	18	social science	0	0	0	0	1	0	0.875	0	0
2013	0	0	23	2	5	30	social science	0	0	0	0	1	0	0.888889	0	0
2013	0	0	22	3	4	35	social science	0	0	0	0	1	0	0.727273	0	0
2013	1	0.0204082	20	1	0	75	social science	1	3	0	3	1	0.000416493	0.959184	1	1
2013	0	0	23	3	6	55	social science	1	3	0	3	1	0	0.538462	1	0
2013	0	0	27	3	5	69	social science	1	3	0	3	1	0	0.951613	1	0
2013	4	0.0634921	23	2	4	82	social science	0	3	0	3	1	0.00403124	0.825397	1	16
2013	3	0.0555556	21	2	5	71	social science	1	0	0	0	1	0.00308642	0.740741	0	9
2013	1	0.0285714	25	10	4	70	social science	1	1	0	1	1	0.000816327	0.628571	1	1
2013	0	0	21	3	5	57	social science	1	0	0	0	1	0	0.466667	0	0
2013	0	0	21	5	5	75	social science	1	0	0	0	1	0	0.736842	0	0
2013	1	0.1	11	3	3	14	social science	0	0	0	0	1	0.01	0.7	0	1
2013	0	0	25	1	5	50	humanities	0	0	0	0	1	0		0	0
2013	0	0	11	3	3	16	social science	1	1	0	1	1	0	0.642857	1	0
2013	3	0.047619	11	5	8	80	social science	1	3	0	3	1	0.00226757	0.952381	1	9
2013	2	0.0322581	18	5	11	80	social science	1	4	1	3	1	0.00104058	0.83871	1	4
2013	3	0.6	1	1	0	8	social science	0	0	0	0	0	0.36	0.2	0	9
2013	20	0.434783	11	3	7	74	social science	0	0	0	0	1	0.189036	0.304348	0	400
2013	5	0.192308	24	2	4	53	humanities	1	0	0	0	1	0.0369822		0	25
2013	3	0.075	28	4	7	61	social science	1	0	0	0	1	0.005625	0.25	0	9
2013	19	1	7	4	3	23	social science	0	0	0	0	0	1	0	0	361
2013	0	0	27	3	5	42	social science	1	0	0	0	1	0	1	0	0
2013	0	0	17	3	4	37	social science	0	0	0	0	1	0	0.666667	0	0
2013	1	0.0833333	14	10	5	33	social science	1	0	0	0	1	0.00694444	0.25	0	1
2013	0	0	20	3	5	45	social science	1	3	0	3	1	0	0.947368	1	0
2013	0	0	21	1	0	30	social science	1	4	0	4	1	0	1	1	0
2013	10	0.37037	22	2	0	61	social science	0	4	0	4	1	0.137174	0.62963	1	100
2013	1	0.0714286	18	2	0	35	social science	0	3	0	3	1	0.00510204	0.785714	1	1
2013	0	0	22	2	0	58	social science	0	1	0	1	1	0	0.928571	1	0
2013	4	0.133333	22	1	0	45	social science	0	3	0	3	1	0.0177778	0.566667	1	16
2013	0	0	19	2	0	55	social science	1	1	0	1	1	0	0.9	1	0
2013	2	0.08	22	2	0	77	social science	1	0	0	0	1	0.0064	0.92	0	4
2013	0	0	18	1	0	54	social science	1	0	0	0	1	0	0.777778	0	0
2013	0	0	11	3	5	21	social science	1	0	0	0	1	0	0.8	0	0
2013	11	0.366667	12	5	3	68	social science	1	8	0	8	1	0.134444	0.333333	1	121
2013	22	1	5	7	4	27	social science	0	0	0	0	0	1	0	0	484
2013	12	0.545455	7	4	0	25	social science	1	0	0	0	0	0.297521	0.409091	0	144
2013	1	0.25	7	4	0	6	social science	1	0	0	0	1	0.0625	0.75	0	1
2013	6	0.545455	14	3	3	12	social science	1	0	0	0	0	0.297521	0.363636	0	36
2013	0	0	21	3	0	98	social science	0	0	0	0	1	0	0.810127	0	0
2013	0	0	26	2	0	55	social science	0	1	0	1	1	0	0.860465	1	0
2013	0	0	11	2	5	84	social science	1	0	0	0	1	0	0.75	0	0
2013	1	0.0172414	11	2	3	66	social science	1	0	0	0	1	0.000297265	0.965517	0	1
2013	0	0	13	4	5	44	social science	1	1	0	1	1	0	1	1	0
2013	0	0	13	1	0	15	humanities	0	0	0	0	1	0		0	0
2013	0	0	15	2	11	23	humanities	1	0	0	0	1	0		0	0
2013	8	0.103896	21	3	6	97	social science	1	0	0	0	1	0.0107944	0.662338	0	64
2013	8	0.5	23	3	3	20	social science	1	1	1	0	0	0.25	0.5	0	64
2013	2	0.0425532	31	3	5	62	social science	1	0	0	0	1	0.00181077	0.808511	0	4
2013	1	0.0333333	13	1	9	54	social science	0	1	0	1	1	0.00111111	0.866667	1	1
2013	22	0.611111	7	2	0	56	social science	1	4	1	3	0	0.373457	0.305556	1	484
2013	4	0.129032	7	4	0	39	social science	0	0	0	0	1	0.0166493	0.129032	0	16
2013	9	0.290323	20	3	6	50	social science	0	0	0	0	1	0.0842872	0.548387	0	81
2013	0	0	15	2	0	24	social science	1	0	0	0	1	0	0.888889	0	0
2013	2	0.0263158	15	4	5	99	social science	1	1	0	1	1	0.000692521	0.605263	1	4
2013	1	0.0178571	16	6	6	68	social science	1	2	0	2	1	0.000318878	0.625	1	1
2013	1	0.0192308	10	5	4	64	social science	1	1	0	1	1	0.000369823	0.865385	1	1
2013	0	0	8	2	4	36	social science	1	0	0	0	1	0	0.9	0	0
2013	9	0.155172	16	6	6	74	social science	0	0	0	0	1	0.0240785	0.637931	0	81
2013	16	0.258065	13	3	5	68	social science	1	0	0	0	1	0.0665973	0.741935	0	256
2013	2	0.0689655	12	2	3	31	social science	0	1	0	1	1	0.00475624	0.931035	1	4
2013	4	0.0784314	18	4	5	82	social science	1	0	0	0	1	0.00615148	0.666667	0	16
2013	0	0	14	3	3	39	social science	1	0	0	0	1	0	0.857143	0	0
2013	1	0.0116279	20	2	6	126	social science	1	0	0	0	1	0.000135208	0.976744	0	1
2013	1	0.0277778	19	3	5	86	social science	0	0	0	0	1	0.000771605	0.944444	0	1
2013	0	0	20	4	3	25	social science	1	0	0	0	1	0	0.6	0	0
2013	0	0	20	2	5	19	social science	0	0	0	0	1	0	1	0	0
2013	1	0.0140845	22	3	6	84	social science	0	0	0	0	1	0.000198373	0.901408	0	1
2013	1	0.0172414	23	2	6	107	social science	1	0	0	0	1	0.000297265	0.758621	0	1
2013	5	0.1	12	2	5	82	social science	1	0	0	0	1	0.01	0.82	0	25
2013	0	0	12	3	0	86	social science	1	0	0	0	1	0	0.634615	0	0
2013	0	0	11	1	6	32	social science	0	0	0	0	1	0	0.526316	0	0
2013	8	0.275862	20	5	5	40	social science	1	0	0	0	1	0.0760999	0.62069	0	64
2013	0	0	5	1	0	2	social science	0	0	0	0	1	0	1	0	0
2013	11	0.183333	21	3	0	66	social science	1	9	2	7	1	0.0336111	0.783333	1	121
2013	31	0.424658	34	3	6	97	social science	1	1	0	1	1	0.180334	0.575342	1	961
2013	2	0.125	12	3	5	23	social science	1	1	0	1	1	0.015625	0.8125	1	4
2013	1	0.0454545	33	3	0	96	social science	1	0	0	0	1	0.00206612	0.818182	0	1
2013	0	0	5	3	4	6	social science	0	0	0	0	1	0	1	0	0
2013	0	0	3	1	4	8	social science	0	0	0	0	1	0	1	0	0
2013	0	0	5	4	5	15	social science	0	1	0	1	1	0	0.5	1	0
2013	1	0.0769231	4	2	5	15	social science	1	0	0	0	1	0.00591716	0.923077	0	1
2013	0	0	5	1	5	8	social science	0	0	0	0	1	0	1	0	0
2013	0	0	5	1	4	15	social science	0	0	0	0	1	0	0.928571	0	0
2013	0	0	13	4	0	55	social science	1	0	0	0	1	0	0.978261	0	0
2013	6	0.181818	7	4	5	45	social science	1	0	0	0	1	0.0330579	0.757576	0	36
2013	2	0.111111	9	1	4	44	social science	0	0	0	0	1	0.0123457	0.722222	0	4
2013	24	0.774194	6	6	3	35	social science	0	0	0	0	0	0.599376	0.225806	0	576
2013	21	0.5	6	3	4	45	social science	1	2	0	2	0	0.25	0.190476	1	441
2013	5	0.106383	23	3	0	66	social science	1	0	0	0	1	0.0113173	0.744681	0	25
2013	0	0	3	1	0	6	humanities	0	0	0	0	1	0		0	0
2013	29	0.47541	13	1	7	69	social science	0	1	0	1	1	0.226015	0.508197	1	841
2013	4	0.133333	15	2	6	35	social science	1	0	0	0	1	0.0177778	0.866667	0	16
2013	21	0.388889	20	3	6	78	social science	0	0	0	0	1	0.151235	0	0	441
2013	1	0.0434783	12	2	6	34	social science	1	1	0	1	1	0.00189036	0.956522	1	1
2013	14	0.5	16	1	5	44	social science	0	0	0	0	0	0.25	0.321429	0	196
2013	0	0	18	2	3	12	social science	1	0	0	0	1	0	1	0	0
2013	0	0	19	2	6	69	social science	0	0	0	0	1	0	0.966667	0	0
2013	0	0	13	4	5	32	social science	1	0	0	0	1	0	0.692308	0	0
2013	2	0.0444444	14	2	5	54	social science	0	0	0	0	1	0.00197531	0.466667	0	4
2013	1	0.0434783	16	3	4	27	social science	0	0	0	0	1	0.00189036	0.608696	0	1
2013	4	0.142857	7	6	6	33	social science	1	0	0	0	1	0.0204082	0.821429	0	16
2013	0	0	10	6	5	80	social science	1	8	0	8	1	0	0.969697	1	0
2013	2	0.0540541	7	3	3	42	social science	0	1	0	1	1	0.00292184	0.837838	1	4
2013	0	0	17	2	5	67	social science	1	0	0	0	1	0	1	0	0
2013	0	0	15	5	7	63	social science	1	0	0	0	1	0	0.714286	0	0
2013	0	0	20	2	6	89	social science	0	2	0	2	1	0	0.693333	1	0
2013	0	0	18	1	6	69	social science	0	0	0	0	1	0	0.785714	0	0
2013	0	0	21	3	6	63	social science	1	0	0	0	1	0	1	0	0
2013	1	0.0117647	25	2	4	106	social science	0	1	0	1	1	0.000138408	0.823529	1	1
2013	2	0.133333	18	1	6	33	social science	0	0	0	0	1	0.0177778	0.266667	0	4
2013	7	0.411765	4	3	0	25	social science	1	1	1	0	1	0.16955	0.470588	0	49
2013	12	0.363636	5	3	4	38	social science	0	0	0	0	1	0.132231	0.393939	0	144
2013	10	0.666667	7	2	5	33	social science	0	0	0	0	0	0.444444	0.333333	0	100
2013	28	0.903226	7	3	5	38	social science	1	0	0	0	0	0.815817	0.0967742	0	784
2013	15	0.714286	9	7	6	24	social science	1	6	3	3	0	0.510204	0.285714	0	225
2013	0	0	15	1	5	29	social science	0	0	0	0	1	0	0.888889	0	0
2013	2	0.2	16	4	7	33	social science	1	0	0	0	1	0.04	0.8	0	4
2013	27	0.675	23	2	4	44	social science	0	3	2	1	0	0.455625	0.325	0	729
2013	0	0	18	3	6	37	social science	1	1	0	1	1	0	0.842105	1	0
2013	1	0.0526316	23	9	8	55	social science	1	0	0	0	1	0.00277008	0.842105	0	1
2013	0	0	23	3	7	51	social science	1	1	1	0	1	0	0.272727	0	0
2013	8	0.296296	10	4	7	36	social science	1	2	0	2	1	0.0877915	0.185185	1	64
2013	5	0.208333	5	4	9	38	social science	0	1	0	1	1	0.0434028	0.75	1	25
2013	2	0.285714	11	1	8	33	social science	0	0	0	0	1	0.0816327	0.428571	0	4
2013	0	0	11	2	7	103	social science	1	1	0	1	1	0	0.870968	1	0
2013	8	0.380952	5	7	8	28	social science	0	0	0	0	1	0.145125	0.619048	0	64
2013	4	0.0869565	33	6	0	89	humanities	0	1	1	0	1	0.00756144		0	16
2013	0	0	12	2	5	38	social science	0	0	0	0	1	0	1	0	0
2013	0	0	9	2	5	22	social science	0	0	0	0	1	0	0.5	0	0
2013	0	0	9	1	4	23	social science	0	0	0	0	1	0	0.916667	0	0
2013	0	0	11	2	4	29	social science	0	0	0	0	1	0	0.5	0	0
2013	3	0.0909091	10	3	6	46	social science	0	0	0	0	1	0.00826446	0.575758	0	9
2013	0	0	12	3	4	33	social science	0	0	0	0	1	0	0.846154	0	0
2013	5	0.454545	7	1	4	18	humanities	0	0	0	0	1	0.206612	0.454545	0	25
2013	1	0.047619	25	1	4	68	social science	0	1	0	1	1	0.00226757	0.952381	1	1
2013	5	0.333333	9	1	3	43	social science	0	2	0	2	1	0.111111	0.666667	1	25
2013	0	0	12	3	5	29	social science	1	0	0	0	1	0	1	0	0
2013	2	0.04	13	5	6	70	social science	0	0	0	0	1	0.0016	0.8	0	4
2013	1	0.0277778	19	1	5	71	social science	0	0	0	0	1	0.000771605	0.777778	0	1
2013	3	0.0789474	11	5	6	53	social science	1	0	0	0	1	0.00623269	0.921053	0	9
2013	12	0.444444	20	3	5	30	social science	0	1	0	1	1	0.197531	0.518519	1	144
2013	0	0	25	3	7	37	social science	0	0	0	0	1	0	1	0	0
2013	4	0.148148	20	3	7	35	social science	1	1	1	0	1	0.0219479	0.851852	0	16
2013	0	0	7	3	3	46	social science	1	1	0	1	1	0	0.666667	1	0
2013	0	0	24	3	6	40	social science	1	2	0	2	1	0	0.5625	1	0
2013	8	0.727273	15	2	6	18	social science	0	0	0	0	0	0.528926	0.181818	0	64
2013	6	0.428571	15	3	6	31	social science	0	0	0	0	1	0.183673	0.357143	0	36
2013	0	0	28	4	5	92	social science	1	3	0	3	1	0	0.960526	1	0
2013	12	0.631579	17	4	4	42	social science	1	0	0	0	0	0.398892	0.315789	0	144
2013	40	0.740741	12	2	4	104	humanities	1	11	3	8	0	0.548697		1	1600
2013	15	0.454545	9	3	6	50	humanities	1	0	0	0	1	0.206612		0	225
2013	52	0.244131	55	3	4	256	social science	1	4	1	3	1	0.0596002	0.530516	1	2704
2013	0	0	12	4	0	75	social science	1	0	0	0	1	0	0.932203	0	0
2013	0	0	13	4	0	44	social science	0	0	0	0	1	0	0.944444	0	0
2013	1	0.0357143	14	2	3	45	social science	1	1	1	0	1	0.00127551	0.857143	0	1
2013	0	0	13	5	7	77	social science	1	1	0	1	1	0	0.978723	1	0
2013	0	0	6	2	6	12	social science	0	0	0	0	1	0	0.833333	0	0
2013	3	0.130435	7	1	5	32	social science	0	0	0	0	1	0.0170132	0.826087	0	9
2013	5	0.192308	8	2	3	49	social science	0	3	0	3	1	0.0369822	0.807692	1	25
2013	2	0.0384615	9	3	6	77	social science	1	1	0	1	1	0.00147929	0.942308	1	4
2013	2	0.0645161	10	2	6	59	social science	1	1	0	1	1	0.00416233	0.935484	1	4
2013	0	0	11	5	5	56	social science	1	0	0	0	1	0	0.857143	0	0
2013	0	0	4	2	3	8	social science	1	1	0	1	1	0	1	1	0
2013	12	0.461538	11	2	6	56	social science	1	0	0	0	1	0.213018	0.307692	0	144
2013	8	0.296296	10	6	5	65	social science	0	0	0	0	1	0.0877915	0.296296	0	64
2013	21	0.75	8	3	7	49	social science	1	1	0	1	0	0.5625	0.107143	1	441
2013	7	0.241379	7	2	5	49	social science	0	0	0	0	1	0.058264	0.62069	0	49
2013	0	0	9	2	5	85	social science	0	0	0	0	1	0	0.785714	0	0
2013	10	0.227273	13	5	0	54	social science	1	3	3	0	1	0.0516529	0.772727	0	100
2013	0	0	22	3	5	28	social science	1	0	0	0	1	0	1	0	0
2013	50	0.847458	12	6	0	73	social science	1	5	3	2	0	0.718184	0.152542	0	2500
2013	0	0	4	2	0	8	social science	1	0	0	0	1	0	1	0	0
2013	4	0.307692	16	2	6	44	social science	0	0	0	0	1	0.0946746	0.615385	0	16
2013	1	0.0833333	18	1	5	35	social science	0	0	0	0	1	0.00694444	0.916667	0	1
2013	0	0	22	2	7	31	social science	1	0	0	0	1	0	1	0	0
2013	3	0.375	15	3	4	24	social science	0	0	0	0	1	0.140625	0	0	9
2013	4	0.444444	19	4	6	23	social science	0	0	0	0	1	0.197531	0.555556	0	16
2013	9	0.45	7	1	0	24	social science	0	1	1	0	1	0.2025	0.55	0	81
2013	1	0.0555556	10	2	0	21	social science	0	1	1	0	1	0.00308642	0.833333	0	1
2013	0	0	24	1	2	40	social science	0	0	0	0	1	0	0.875	0	0
2013	1	0.0166667	16	5	8	72	social science	0	0	0	0	1	0.000277778	0.766667	0	1
2013	0	0	19	3	5	36	social science	0	4	2	2	1	0	0.964286	0	0
2013	1	0.142857	14	4	5	23	social science	1	0	0	0	1	0.0204082	0.857143	0	1
2013	9	0.5625	8	4	5	20	social science	0	0	0	0	0	0.316406	0.25	0	81
2013	10	0.294118	15	3	8	46	social science	0	2	1	1	1	0.0865052	0.676471	0	100
2013	10	0.277778	20	5	6	55	social science	1	0	0	0	1	0.0771605	0.527778	0	100
2013	9	0.391304	19	4	5	30	social science	0	1	0	1	1	0.153119	0.608696	1	81
2013	1	0.0666667	16	4	5	55	social science	1	0	0	0	1	0.00444444	0.333333	0	1
2013	0	0	15	1	0	33	social science	0	0	0	0	1	0	0.806452	0	0
2013	23	0.793103	11	2	5	43	social science	0	0	0	0	0	0.629013	0.172414	0	529
2013	12	0.923077	32	3	8	22	social science	1	1	1	0	0	0.852071	0.0769231	0	144
2013	1	0.0208333	19	4	6	58	social science	1	0	0	0	1	0.000434028	0.75	0	1
2013	1	0.0222222	14	2	6	71	social science	0	0	0	0	1	0.000493827	0.333333	0	1
2013	21	0.428571	12	6	6	68	social science	1	1	0	1	1	0.183673	0.367347	1	441
2013	23	0.323944	10	2	4	75	social science	0	1	0	1	1	0.10494	0.633803	1	529
2013	31	0.688889	18	1	0	68	social science	1	0	0	0	0	0.474568	0.288889	0	961
2013	2	0.0714286	10	4	5	57	social science	0	0	0	0	1	0.00510204	0.464286	0	4
2013	0	0	8	1	3	11	social science	0	0	0	0	1	0	1	0	0
2013	0	0	25	2	4	138	social science	0	6	0	6	1	0	0.984733	1	0
2013	0	0	7	2	0	4	social science	1	0	0	0	1	0	1	0	0
2013	16	0.516129	18	1	0	49	social science	0	0	0	0	0	0.266389	0	0	256
2013	1	0.0588235	15	2	7	38	social science	1	0	0	0	1	0.00346021	0.588235	0	1
2013	3	0.103448	13	3	5	42	social science	1	0	0	0	1	0.0107015	0.551724	0	9
2013	4	0.1	10	4	5	48	social science	0	1	0	1	1	0.01	0.175	1	16
2013	5	0.625	7	4	8	17	social science	0	0	0	0	0	0.390625	0.375	0	25
2013	3	0.3	9	1	7	26	social science	0	0	0	0	1	0.09	0.7	0	9
2013	12	0.705882	7	4	6	19	social science	0	0	0	0	0	0.49827	0	0	144
2013	10	0.47619	18	4	0	36	social science	1	0	0	0	1	0.226757	0.52381	0	100
2013	0	0	16	2	0	41	social science	1	0	0	0	1	0	0.88	0	0
2013	18	0.382979	7	3	7	62	social science	1	7	5	2	1	0.146673	0.170213	0	324
2013	2	0.0285714	21	5	4	97	social science	1	1	0	1	1	0.000816327	0.771429	1	4
2013	3	0.142857	9	3	5	31	social science	0	0	0	0	1	0.0204082	0.619048	0	9
2013	0	0	4	3	4	7	social science	0	0	0	0	1	0	0.5	0	0
2013	0	0	8	3	5	52	social science	1	0	0	0	1	0	0.956522	0	0
2013	1	0.0434783	18	2	7	34	social science	1	0	0	0	1	0.00189036	0.956522	0	1
2013	0	0	13	2	3	43	social science	1	0	0	0	1	0	0.90625	0	0
2013	5	0.217391	10	1	3	35	social science	0	5	4	1	1	0.047259	0.782609	0	25
2013	0	0	25	3	0	39	social science	1	0	0	0	1	0	0.428571	0	0
2013	0	0	11	3	4	39	social science	1	0	0	0	1	0	0.75	0	0
2013	0	0	5	1	4	5	social science	0	0	0	0	1	0	1	0	0
2013	11	0.183333	12	4	6	68	social science	1	7	6	1	1	0.0336111	0.816667	0	121
2013	15	0.428571	10	4	6	45	social science	0	1	0	1	1	0.183673	0.571429	1	225
2013	5	0.357143	18	7	0	36	social science	1	0	0	0	1	0.127551	0.0714286	0	25
2013	6	0.545455	9	1	5	102	social science	0	0	0	0	0	0.297521	0.181818	0	36
2013	0	0	4	1	6	15	social science	0	0	0	0	1	0	0	0	0
2013	1	0.2	11	2	4	47	social science	0	0	0	0	1	0.04	0.2	0	1
2013	25	0.581395	11	5	5	96	social science	1	4	1	3	0	0.338021	0.0465116	1	625
2013	1	1	11	1	5	44	social science	0	1	0	1	0	1	0	1	1
2013	11	0.6875	9	2	7	50	social science	1	0	0	0	0	0.472656	0.0625	0	121
2013	20	0.625	16	5	5	44	social science	0	2	1	1	0	0.390625	0.34375	0	400
2013	10	0.666667	6	2	5	22	humanities	0	0	0	0	0	0.444444	0.0666667	0	100
2013	38	0.76	13	5	6	72	social science	0	0	0	0	0	0.5776	0.16	0	1444
2013	11	0.6875	11	3	5	27	social science	1	0	0	0	0	0.472656	0.3125	0	121
2013	9	0.5	12	2	5	26	social science	0	6	3	3	0	0.25	0.444444	0	81
2013	12	0.307692	9	5	5	53	social science	1	1	1	0	1	0.0946746	0.615385	0	144
2013	7	0.134615	13	2	5	68	social science	1	0	0	0	1	0.0181213	0.865385	0	49
2013	8	0.421053	9	6	7	27	social science	1	1	1	0	1	0.177285	0.578947	0	64
2013	1	0.0454545	12	3	7	32	social science	1	1	1	0	1	0.00206612	0.954545	0	1
2013	0	0	3	2	3	11	social science	0	1	0	1	1	0	0.666667	1	0
2013	0	0	19	3	5	37	social science	1	1	1	0	1	0	1	0	0
2013	22	1	6	3	4	22	social science	0	0	0	0	0	1	0	0	484
2013	19	0.826087	5	7	4	26	social science	0	1	1	0	0	0.68242	0	0	361
2013	19	0.730769	8	8	8	30	social science	1	0	0	0	0	0.534024	0.269231	0	361
2013	13	0.481481	14	11	8	35	social science	1	1	1	0	1	0.231824	0.333333	0	169
2013	1	0.0357143	19	3	0	44	social science	1	0	0	0	1	0.00127551	0	0	1
2013	0	0	23	6	0	47	social science	1	0	0	0	1	0	0.464286	0	0
2013	0	0	28	3	0	35	social science	1	2	0	2	1	0	0.363636	1	0
2013	0	0	33	3	0	47	social science	1	0	0	0	1	0	0.484849	0	0
2013	2	0.153846	18	3	3	15	social science	1	0	0	0	1	0.0236686	0.846154	0	4
2013	0	0	8	1	0	16	humanities	0	0	0	0	1	0		0	0
2013	0	0	13	1	0	17	humanities	0	0	0	0	1	0		0	0
2013	0	0	18	1	5	50	social science	1	0	0	0	1	0	0.8	0	0
2013	24	0.55814	21	2	6	74	social science	1	0	0	0	0	0.31152	0.395349	0	576
2013	23	0.433962	18	4	10	66	social science	1	0	0	0	1	0.188323	0.471698	0	529
2013	0	0	29	4	3	110	social science	0	2	0	2	1	0	0.915663	1	0
2013	2	0.0384615	20	2	7	65	social science	0	1	0	1	1	0.00147929	0.826923	1	4
2013	0	0	17	3	5	66	social science	1	0	0	0	1	0	0.888889	0	0
2013	2	0.0571429	19	2	7	54	social science	0	0	0	0	1	0.00326531	0.742857	0	4
2013	1	0.0833333	17	2	7	28	social science	1	1	1	0	1	0.00694444	0.583333	0	1
2013	23	0.657143	11	3	5	60	social science	0	10	8	2	0	0.431837	0.2	0	529
2013	35	0.555556	15	3	6	98	social science	1	0	0	0	0	0.308642	0.428571	0	1225
2013	0	0	5	2	6	41	social science	1	0	0	0	1	0	1	0	0
2013	12	0.307692	8	3	5	56	social science	0	0	0	0	1	0.0946746	0.692308	0	144
2013	28	0.756757	8	6	0	39	social science	1	0	0	0	0	0.572681	0.243243	0	784
2013	4	0.0833333	22	3	0	65	social science	0	1	0	1	1	0.00694444	0.666667	1	16
2013	1	0.0322581	14	3	0	34	social science	0	0	0	0	1	0.00104058	0.935484	0	1
2013	0	0	8	1	6	22	social science	0	1	0	1	1	0	1	1	0
2013	4	0.181818	14	5	5	46	social science	0	0	0	0	1	0.0330579	0.727273	0	16
2013	6	0.24	17	4	0	29	social science	0	0	0	0	1	0.0576	0.76	0	36
2013	9	0.236842	12	7	7	44	social science	1	1	0	1	1	0.0560942	0.657895	1	81
2013	0	0	21	1	0	74	humanities	0	0	0	0	1	0		0	0
2013	16	0.390244	17	1	5	49	social science	1	1	1	0	1	0.15229	0.585366	0	256
2013	0	0	24	1	0	34	social science	0	2	0	2	1	0	1	1	0
2013	0	0	7	4	0	15	social science	1	0	0	0	1	0	1	0	0
2013	4	0.266667	7	2	0	23	social science	1	1	1	0	1	0.0711111	0.733333	0	16
2013	5	0.238095	14	4	4	34	social science	1	0	0	0	1	0.0566893	0.761905	0	25
2013	0	0	12	3	6	43	social science	0	0	0	0	1	0	0.846154	0	0
2013	0	0	11	1	0	15	humanities	0	0	0	0	1	0		0	0
2013	0	0	13	1	0	15	humanities	0	1	0	1	1	0		1	0
2013	0	0	3	1	0	9	humanities	0	0	0	0	1	0		0	0
2013	0	0	3	1	0	6	humanities	1	0	0	0	1	0		0	0
2013	15	0.294118	28	4	4	72	social science	1	0	0	0	1	0.0865052	0.27451	0	225
2013	0	0	19	1	4	87	social science	0	0	0	0	1	0	0.333333	0	0
2013	1	0.030303	8	3	5	40	social science	0	6	4	2	1	0.000918274	0.969697	0	1
2013	3	0.375	6	7	6	13	social science	1	0	0	0	1	0.140625	0.375	0	9
2013	4	0.4	8	7	4	25	social science	1	2	2	0	1	0.16	0.6	0	16
2013	16	0.432432	10	3	5	47	social science	1	1	1	0	1	0.186998	0.513514	0	256
2013	2	0.0869565	15	3	4	30	social science	1	1	0	1	1	0.00756144	0.913044	1	4
2013	0	0	27	2	0	96	social science	1	0	0	0	1	0	0.983607	0	0
2013	1	0.25	17	2	5	61	social science	0	0	0	0	1	0.0625	0.75	0	1
2013	4	0.142857	19	2	6	87	social science	1	2	0	2	1	0.0204082	0.464286	1	16
2013	11	0.44	20	3	6	44	social science	1	0	0	0	1	0.1936	0.44	0	121
2013	0	0	21	2	6	63	social science	1	0	0	0	1	0	0.769231	0	0
2013	8	0.181818	24	3	5	54	social science	1	0	0	0	1	0.0330579	0.75	0	64
2013	2	0.0408163	29	3	5	73	social science	0	0	0	0	1	0.00166597	0.530612	0	4
2013	1	0.0434783	18	2	4	33	social science	1	1	0	1	1	0.00189036	0.956522	1	1
2013	2	0.0243902	31	3	6	126	social science	1	4	2	2	1	0.000594884	0.963415	0	4
2013	1	0.05	5	5	0	43	social science	1	0	0	0	1	0.0025	0.75	0	1
2013	2	1	3	3	0	5	social science	1	0	0	0	0	1	0	0	4
2013	0	0	5	2	0	8	social science	0	0	0	0	1	0	0.714286	0	0
2013	10	0.47619	9	6	0	33	social science	1	0	0	0	1	0.226757	0.52381	0	100
2013	13	0.317073	22	2	7	56	social science	1	0	0	0	1	0.100535	0.682927	0	169
2013	0	0	14	4	5	29	social science	1	1	1	0	1	0	0.928571	0	0
2013	0	0	23	1	5	21	social science	0	1	0	1	1	0	1	1	0
2013	0	0	17	2	4	33	social science	1	0	0	0	1	0	0.923077	0	0
2013	10	0.588235	8	6	6	27	social science	0	0	0	0	0	0.346021	0.352941	0	100
2013	12	0.48	6	5	5	38	social science	0	0	0	0	1	0.2304	0.2	0	144
2013	0	0	3	6	0	10	social science	0	0	0	0	1	0	1	0	0
2013	3	0.107143	16	6	6	32	social science	1	0	0	0	1	0.0114796	0.892857	0	9
2013	10	0.47619	25	3	0	72	social science	1	3	1	2	1	0.226757	0.47619	1	100
2013	1	0.111111	21	2	0	94	social science	1	6	0	6	1	0.0123457	0.888889	1	1
2013	0	0	11	2	0	41	social science	0	0	0	0	1	0	1	0	0
2013	0	0	11	6	0	78	social science	1	0	0	0	1	0	0.914894	0	0
2013	0	0	9	2	0	30	social science	0	0	0	0	1	0	1	0	0
2013	13	0.433333	9	6	5	35	social science	1	1	0	1	1	0.187778	0.533333	1	169
2013	2	0.031746	18	3	7	67	social science	0	0	0	0	1	0.00100781	0.936508	0	4
2013	1	0.0714286	10	8	0	18	social science	1	0	0	0	1	0.00510204	0.571429	0	1
2013	15	0.283019	9	5	0	60	social science	1	0	0	0	1	0.0800997	0.320755	0	225
2013	18	0.75	6	7	0	30	social science	0	1	1	0	0	0.5625	0.25	0	324
2013	38	0.633333	12	6	3	95	social science	1	0	0	0	0	0.401111	0.183333	0	1444
2013	2	0.125	12	3	5	19	social science	0	0	0	0	1	0.015625	0.625	0	4
2013	1	0.0833333	5	2	4	14	social science	0	0	0	0	1	0.00694444	0.75	0	1
2013	6	0.26087	14	2	6	31	social science	1	0	0	0	1	0.0680529	0.73913	0	36
2013	17	0.653846	15	7	5	38	social science	0	0	0	0	0	0.427515	0.346154	0	289
2013	17	0.515151	9	3	6	45	social science	0	1	0	1	0	0.265381	0.363636	1	289
2013	18	0.428571	12	5	5	59	social science	1	0	0	0	1	0.183673	0.404762	0	324
2013	5	0.104167	11	4	5	63	social science	1	0	0	0	1	0.0108507	0.8125	0	25
2013	0	0	12	3	5	7	social science	1	0	0	0	1	0	1	0	0
2013	0	0	9	3	6	81	social science	1	0	0	0	1	0	0.983607	0	0
2013	1	0.0714286	8	4	5	28	social science	1	2	0	2	1	0.00510204	0.928571	1	1
2013	19	0.633333	12	3	5	39	social science	1	1	1	0	0	0.401111	0.366667	0	361
2013	7	0.318182	18	2	5	37	social science	1	0	0	0	1	0.10124	0.681818	0	49
2013	4	0.4	9	3	3	11	social science	1	0	0	0	1	0.16	0.6	0	16
2013	0	0	11	3	5	37	social science	1	0	0	0	1	0	0.137931	0	0
2013	0	0	20	1	3	21	social science	0	0	0	0	1	0	1	0	0
2013	0	0	22	3	0	17	social science	1	0	0	0	1	0	1	0	0
2013	3	0.0566038	8	4	0	59	social science	0	0	0	0	1	0.00320399	0.301887	0	9
2013	1	0.0625	24	2	5	30	social science	1	0	0	0	1	0.00390625	0.1875	0	1
2013	1	0.125	14	4	4	15	social science	0	0	0	0	1	0.015625	0.125	0	1
2013	17	1	7	4	3	20	social science	0	0	0	0	0	1	0	0	289
2013	1	1	2	6	0	1	social science	0	0	0	0	0	1	0	0	1
2013	2	1	1	1	2	3	humanities	0	0	0	0	0	1	0	0	4
2013	15	0.681818	7	3	4	44	social science	1	0	0	0	0	0.464876	0.0454545	0	225
2013	5	0.263158	7	5	5	19	social science	1	3	0	3	1	0.0692521	0.736842	1	25
2013	0	0	16	5	10	36	humanities	1	0	0	0	1	0		0	0
2013	2	0.0952381	16	3	5	41	social science	1	0	0	0	1	0.0090703	0.52381	0	4
2013	0	0	13	2	3	14	social science	0	0	0	0	1	0	0.857143	0	0
2013	20	0.3125	17	3	5	96	social science	1	0	0	0	1	0.0976562	0	0	400
2013	10	0.357143	8	5	6	45	social science	1	0	0	0	1	0.127551	0.107143	0	100
2013	18	0.486486	14	3	5	62	social science	1	0	0	0	1	0.236669	0.0540541	0	324
2013	18	0.947368	5	4	5	32	social science	1	0	0	0	0	0.897507	0.0526316	0	324
2013	3	0.0588235	19	3	6	62	social science	1	0	0	0	1	0.00346021	0.803922	0	9
2013	1	0.0285714	10	2	5	48	social science	0	0	0	0	1	0.000816327	0.228571	0	1
2013	1	0.142857	22	2	6	35	humanities	1	0	0	0	1	0.0204082		0	1
2013	1	1	12	1	6	34	humanities	0	0	0	0	0	1		0	1
2013	2	0.5	33	3	7	31	humanities	0	0	0	0	0	0.25		0	4
2013	15	0.288462	10	3	6	58	social science	1	2	1	1	1	0.0832101	0.461538	0	225
2013	10	0.322581	7	12	5	34	social science	1	1	1	0	1	0.104058	0.129032	0	100
2013	16	0.615385	9	13	6	30	social science	1	5	3	2	0	0.378698	0.115385	0	256
2013	0	0	22	3	5	44	social science	0	0	0	0	1	0	0.363636	0	0
2013	0	0	11	1	0	24	humanities	0	1	0	1	1	0		1	0
2013	9	0.818182	21	4	0	18	social science	1	0	0	0	0	0.669421	0.181818	0	81
2013	41	0.788462	28	3	0	63	social science	1	1	1	0	0	0.621672	0.211538	0	1681
2013	2	0.117647	15	5	6	41	social science	1	0	0	0	1	0.0138408	0.470588	0	4
2013	1	0.0222222	12	3	6	73	social science	1	1	0	1	1	0.000493827	0.444444	1	1
2013	10	0.25	13	4	6	62	social science	1	1	0	1	1	0.0625	0.725	1	100
2013	16	0.516129	13	4	4	44	social science	0	0	0	0	0	0.266389	0.16129	0	256
2013	20	0.689655	11	5	4	50	social science	1	1	0	1	0	0.475624	0.310345	1	400
2013	0	0	17	1	6	38	social science	0	0	0	0	1	0	1	0	0
2013	0	0	7	1	0	22	social science	0	0	0	0	1	0	0.833333	0	0
2013	3	0.09375	17	2	5	46	social science	1	2	1	1	1	0.00878906	0.78125	0	9
2013	5	0.142857	16	4	5	40	social science	1	1	0	1	1	0.0204082	0.857143	1	25
2013	0	0	11	5	5	35	social science	1	0	0	0	1	0	0.269231	0	0
2013	2	0.0588235	20	3	3	44	social science	1	4	0	4	1	0.00346021	0.588235	1	4
2013	0	0	9	3	4	27	social science	1	0	0	0	1	0	0.904762	0	0
2013	5	0.131579	15	3	4	62	social science	0	0	0	0	1	0.017313	0.815789	0	25
2013	0	0	12	2	5	84	social science	1	1	0	1	1	0	0.894737	1	0
2013	0	0	10	2	7	69	social science	0	1	0	1	1	0	0.921875	1	0
2013	1	0.0169492	27	3	0	89	social science	0	0	0	0	1	0.000287274	0.966102	0	1
2013	1	0.0588235	18	2	0	40	social science	0	0	0	0	1	0.00346021	0.882353	0	1
2013	0	0	23	4	4	20	social science	1	0	0	0	1	0	1	0	0
2013	1	0.0526316	13	2	4	27	social science	0	0	0	0	1	0.00277008	0.736842	0	1
2013	25	0.925926	9	3	6	32	social science	1	2	2	0	0	0.857339	0.037037	0	625
2013	36	0.666667	7	6	5	58	social science	1	1	1	0	0	0.444444	0.314815	0	1296
2013	47	0.94	8	4	4	53	social science	1	10	10	0	0	0.8836	0.06	0	2209
2013	37	0.627119	8	4	5	67	social science	1	2	2	0	0	0.393278	0.288136	0	1369
2013	12	0.631579	13	3	3	26	social science	0	0	0	0	0	0.398892	0.105263	0	144
2013	1	0.0107527	36	3	0	116	social science	1	0	0	0	1	0.00011562	0.935484	0	1
2013	7	0.259259	7	4	0	49	social science	1	1	0	1	1	0.0672154	0.666667	1	49
2013	19	0.2375	25	4	4	125	social science	1	1	0	1	1	0.0564062	0.7625	1	361
2013	0	0	14	1	4	43	humanities	0	0	0	0	1	0		0	0
2013	6	0.857143	2	1	0	13	social science	0	0	0	0	0	0.734694	0.142857	0	36
2013	0	0	7	1	0	18	social science	0	0	0	0	1	0	1	0	0
2013	1	0.0588235	17	3	4	22	social science	1	0	0	0	1	0.00346021	0.294118	0	1
2013	0	0	19	3	6	70	social science	1	0	0	0	1	0	0.511111	0	0
2013	1	0.0277778	17	2	4	43	social science	1	1	0	1	1	0.000771605	0.444444	1	1
2013	0	0	21	1	6	46	social science	0	1	0	1	1	0	0.363636	1	0
2013	2	0.0714286	8	3	7	35	social science	1	1	0	1	1	0.00510204	0.75	1	4
2013	0	0	13	1	4	52	social science	0	0	0	0	1	0	1	0	0
2013	0	0	14	1	5	50	social science	0	0	0	0	1	0	1	0	0
2013	0	0	17	2	6	34	social science	1	1	0	1	1	0	1	1	0
2013	5	0.333333	16	4	5	26	social science	1	0	0	0	1	0.111111	0.333333	0	25
2013	28	0.4375	19	3	5	98	social science	1	1	0	1	1	0.191406	0.484375	1	784
2013	14	0.933333	7	10	3	17	social science	0	0	0	0	0	0.871111	0	0	196
2013	0	0	12	5	5	21	social science	1	1	0	1	1	0	0.857143	1	0
2013	24	0.857143	9	9	5	32	social science	1	0	0	0	0	0.734694	0.142857	0	576
2013	0	0	4	7	6	14	social science	0	0	0	0	1	0	1	0	0
2013	30	0.714286	6	4	5	49	social science	0	2	2	0	0	0.510204	0.261905	0	900
2013	0	0	20	2	6	57	social science	1	0	0	0	1	0	0.555556	0	0
2013	7	0.194444	19	3	6	62	social science	0	0	0	0	1	0.0378086	0.694444	0	49
2013	18	0.62069	14	1	6	53	social science	0	1	1	0	0	0.385256	0.37931	0	324
2013	1	0.125	9	1	0	19	social science	0	4	0	4	1	0.015625	0.875	1	1
2013	39	0.709091	29	3	4	69	social science	1	0	0	0	0	0.50281	0.290909	0	1521
2013	9	0.214286	11	5	3	57	social science	1	3	0	3	1	0.0459184	0.47619	1	81
2013	12	0.2	32	4	0	103	social science	0	0	0	0	1	0.04	0.75	0	144
2013	0	0	14	1	0	39	social science	0	0	0	0	1	0	0.875	0	0
2013	3	0.0789474	13	1	5	56	humanities	0	1	0	1	1	0.00623269		1	9
2013	16	0.695652	9	4	7	36	social science	1	0	0	0	0	0.483932	0.0434783	0	256
2013	3	0.0588235	34	4	4	67	social science	1	0	0	0	1	0.00346021	0.823529	0	9
2013	22	0.916667	15	3	5	29	social science	0	0	0	0	0	0.840278	0.0416667	0	484
2013	0	0	6	3	5	21	social science	1	0	0	0	1	0	0.6875	0	0
2013	14	0.291667	11	4	4	52	social science	1	1	0	1	1	0.0850694	0.708333	1	196
2013	0	0	13	3	4	48	social science	1	0	0	0	1	0	0.542857	0	0
2013	3	0.0428571	17	3	4	85	social science	0	0	0	0	1	0.00183673	0.771429	0	9
2013	0	0	18	3	5	94	social science	0	0	0	0	1	0	0.880597	0	0
2013	2	0.0769231	21	4	3	57	humanities	1	0	0	0	1	0.00591716		0	4
2013	12	0.444444	8	4	5	35	social science	1	1	1	0	1	0.197531	0.518519	0	144
2013	6	1	1	3	0	6	social science	0	0	0	0	0	1	0	0	36
2013	6	0.461538	12	2	5	19	social science	1	0	0	0	1	0.213018	0.384615	0	36
2013	6	0.461538	7	2	3	15	social science	1	0	0	0	1	0.213018	0.307692	0	36
2013	0	0	14	2	0	41	social science	1	2	0	2	1	0	0.961538	1	0
2013	1	0.0526316	18	2	3	54	social science	0	0	0	0	1	0.00277008	0.842105	0	1
2013	3	0.125	23	3	8	31	social science	1	0	0	0	1	0.015625	0.833333	0	9
2013	0	0	4	1	4	17	social science	0	0	0	0	1	0	0.466667	0	0
2013	5	0.555556	3	3	6	11	social science	1	0	0	0	0	0.308642	0.444444	0	25
2013	4	0.166667	9	2	3	28	social science	0	0	0	0	1	0.0277778	0.625	0	16
2013	2	0.0952381	18	3	5	35	social science	0	0	0	0	1	0.0090703	0.904762	0	4
2013	0	0	24	4	4	49	social science	1	1	0	1	1	0	0.512821	1	0
2013	0	0	23	3	6	86	social science	1	4	0	4	1	0	0.636364	1	0
2013	2	0.0322581	25	2	8	83	social science	1	1	0	1	1	0.00104058	0.387097	1	4
2013	0	0	21	1	4	55	social science	0	3	0	3	1	0	0.302326	1	0
2013	6	0.3	26	3	5	24	social science	1	0	0	0	1	0.09	0.1	0	36
2013	0	0	27	3	3	19	social science	0	0	0	0	1	0	1	0	0
2013	5	0.147059	27	2	6	47	social science	0	1	1	0	1	0.0216263	0.823529	0	25
2013	5	0.208333	17	3	6	31	social science	1	0	0	0	1	0.0434028	0.666667	0	25
2013	0	0	16	3	4	34	social science	0	2	1	1	1	0	0.73913	0	0
2013	0	0	18	2	5	32	social science	1	0	0	0	1	0	0.133333	0	0
2013	1	0.025	20	2	4	83	social science	1	0	0	0	1	0.000625	0.85	0	1
2013	1	0.0714286	14	5	6	20	social science	1	0	0	0	1	0.00510204	0.928571	0	1
2013	4	0.190476	18	3	3	30	social science	0	0	0	0	1	0.0362812	0.809524	0	16
2013	3	0.0454545	14	3	6	95	social science	1	2	0	2	1	0.00206612	0.833333	1	9
2013	1	0.0666667	17	1	2	18	social science	0	0	0	0	1	0.00444444	0.933333	0	1
2013	4	0.363636	19	4	6	20	social science	1	1	0	1	1	0.132231	0.636364	1	16
2013	5	0.294118	20	3	6	30	social science	0	0	0	0	1	0.0865052	0.705882	0	25
2013	3	0.075	9	3	6	45	social science	0	0	0	0	1	0.005625	0.55	0	9
2013	7	0.225806	11	6	6	34	social science	0	0	0	0	1	0.0509886	0.741935	0	49
2013	13	0.464286	23	2	3	38	social science	1	0	0	0	1	0.215561	0.5	0	169
2013	0	0	24	3	4	18	social science	0	0	0	0	1	0	0.555556	0	0
2013	4	0.0909091	8	4	3	55	social science	0	1	0	1	1	0.00826446	0.772727	1	16
2013	1	0.0344828	10	2	4	63	social science	0	3	0	3	1	0.00118906	0.965517	1	1
2013	9	0.214286	14	5	3	63	social science	1	2	0	2	1	0.0459184	0.738095	1	81
2013	4	0.4	16	3	5	12	social science	1	0	0	0	1	0.16	0.6	0	16
2013	20	0.666667	8	5	4	59	social science	1	5	3	2	0	0.444444	0.1	0	400
2013	0	0	9	2	4	38	social science	1	2	0	2	1	0	0.117647	1	0
2013	20	0.606061	10	2	7	48	social science	0	0	0	0	0	0.367309	0.363636	0	400
2013	18	0.315789	7	4	5	71	social science	0	1	0	1	1	0.099723	0.333333	1	324
2013	11	0.297297	9	4	4	51	social science	1	0	0	0	1	0.0883857	0.567568	0	121
2013	17	0.485714	8	3	4	55	social science	1	0	0	0	1	0.235918	0.457143	0	289
2013	10	0.232558	10	3	7	61	social science	0	4	1	3	1	0.0540833	0.44186	1	100
2013	10	0.5	7	4	5	24	social science	1	1	1	0	0	0.25	0.3	0	100
2013	3	0.3	11	3	4	38	social science	1	1	0	1	1	0.09	0.6	1	9
2013	0	0	14	4	6	35	social science	0	0	0	0	1	0	0.1	0	0
2013	1	0.1	10	2	4	39	social science	1	0	0	0	1	0.01	0.8	0	1
2013	1	0.0277778	7	1	7	42	social science	0	1	0	1	1	0.000771605	0.611111	1	1
2013	3	0.0697674	25	8	5	61	social science	1	2	0	2	1	0.0048675	0.418605	1	9
2013	15	0.6	15	3	4	47	social science	1	1	0	1	0	0.36	0.2	1	225
2013	23	0.676471	13	5	6	43	social science	1	0	0	0	0	0.457612	0.323529	0	529
2013	15	0.681818	9	4	4	29	social science	0	2	1	1	0	0.464876	0.318182	0	225
2013	1	0.0555556	22	2	6	29	social science	0	0	0	0	1	0.00308642	0.833333	0	1
2013	8	0.205128	18	5	4	47	social science	1	1	1	0	1	0.0420776	0.769231	0	64
2013	0	0	9	7	5	40	social science	1	2	0	2	1	0	1	1	0
2013	0	0	20	3	0	40	social science	1	2	0	2	1	0	0.714286	1	0
2013	0	0	19	6	0	34	social science	1	0	0	0	1	0	0.2	0	0
2013	1	0.0217391	17	3	5	68	social science	1	2	0	2	1	0.00047259	0.782609	1	1
2013	19	0.633333	20	4	3	82	social science	1	0	0	0	0	0.401111	0.366667	0	361
2013	4	0.25	13	4	3	29	social science	0	0	0	0	1	0.0625	0.5625	0	16
2013	9	0.333333	16	6	3	62	social science	1	0	0	0	1	0.111111	0.592593	0	81
2013	36	0.75	20	2	4	62	social science	0	1	1	0	0	0.5625	0.208333	0	1296
2013	0	0	29	2	0	48	social science	1	4	0	4	1	0	0.947368	1	0
2013	20	0.666667	11	5	0	54	social science	0	1	0	1	0	0.444444	0.3	1	400
2013	1	0.027027	12	4	0	48	social science	0	0	0	0	1	0.00073046	0.405405	0	1
2013	2	0.0465116	16	3	0	56	social science	0	0	0	0	1	0.00216333	0.604651	0	4
2013	7	0.2	8	5	5	51	social science	0	0	0	0	1	0.04	0.0571429	0	49
2013	5	0.185185	12	2	3	35	social science	1	0	0	0	1	0.0342936	0.518519	0	25
2013	1	0.166667	10	5	4	13	social science	0	0	0	0	1	0.0277778	0.5	0	1
2013	2	0.181818	22	2	6	49	social science	1	0	0	0	1	0.0330579	0.818182	0	4
2013	5	0.384615	12	2	6	51	social science	1	1	0	1	1	0.147929	0.538462	1	25
2013	1	0.0344828	14	3	6	40	social science	1	0	0	0	1	0.00118906	0.551724	0	1
2013	6	0.333333	9	2	6	28	social science	1	0	0	0	1	0.111111	0.222222	0	36
2013	0	0	19	2	0	42	social science	0	0	0	0	1	0	0.945946	0	0
2013	0	0	28	2	0	25	social science	1	0	0	0	1	0	1	0	0
2013	2	0.0363636	21	2	6	72	social science	1	0	0	0	1	0.00132231	0.236364	0	4
2013	5	0.238095	8	2	5	26	social science	0	1	0	1	1	0.0566893	0	1	25
2013	0	0	17	2	0	99	social science	0	0	0	0	1	0	0.867647	0	0
2013	1	0.0147059	21	3	0	100	social science	1	0	0	0	1	0.000216263	0.867647	0	1
2013	0	0	8	3	5	11	social science	0	0	0	0	1	0	0	0	0
2013	0	0	6	1	4	9	social science	1	0	0	0	1	0	0.666667	0	0
2013	2	0.0392157	19	3	0	82	social science	1	2	1	1	1	0.00153787	0.490196	0	4
2013	4	0.117647	25	5	0	45	social science	0	4	4	0	1	0.0138408	0.264706	0	16
2013	0	0	5	3	6	11	social science	0	0	0	0	1	0	0.888889	0	0
2013	0	0	5	3	6	9	social science	0	0	0	0	1	0	0.857143	0	0
2013	0	0	4	1	7	12	social science	0	0	0	0	1	0	1	0	0
2013	49	0.844828	30	3	6	126	social science	1	2	2	0	0	0.713734	0.155172	0	2401
2013	9	0.3	13	2	3	38	social science	1	1	0	1	1	0.09	0.666667	1	81
2013	1	0.0212766	11	2	5	74	social science	1	0	0	0	1	0.000452693	0.531915	0	1
2013	2	0.0666667	11	1	0	58	social science	0	1	0	1	1	0.00444444	0.3	1	4
2013	7	0.259259	6	6	3	37	social science	1	0	0	0	1	0.0672154	0.592593	0	49
2013	1	0.0526316	5	3	3	23	social science	0	0	0	0	1	0.00277008	0.947368	0	1
2013	0	0	9	4	6	55	social science	1	1	0	1	1	0	0.885714	1	0
2013	1	0.25	15	4	5	33	social science	1	0	0	0	1	0.0625	0.75	0	1
2013	1	0.0185185	19	3	5	68	social science	0	0	0	0	1	0.000342936	0.685185	0	1
2013	0	0	19	4	6	65	social science	1	2	0	2	1	0	0.634615	1	0
2013	0	0	20	3	7	65	social science	1	0	0	0	1	0	0.538462	0	0
2013	0	0	18	3	6	47	social science	1	0	0	0	1	0	0.961538	0	0
2013	2	0.0289855	24	3	6	91	social science	1	3	1	2	1	0.00084016	0.84058	1	4
2013	6	0.26087	13	4	6	26	social science	0	0	0	0	1	0.0680529	0.608696	0	36
2013	4	0.307692	13	5	6	35	social science	1	2	1	1	1	0.0946746	0.307692	0	16
2013	1	0.0204082	9	3	6	72	social science	0	1	1	0	1	0.000416493	0.918367	0	1
2013	0	0	10	5	5	80	social science	1	0	0	0	1	0	0.957143	0	0
2013	0	0	9	4	4	51	social science	0	0	0	0	1	0	0.914894	0	0
2013	0	0	11	5	5	42	social science	1	1	0	1	1	0	1	1	0
2013	6	0.214286	12	2	7	32	social science	0	3	2	1	1	0.0459184	0.678571	0	36
2013	1	0.0714286	9	2	5	53	social science	1	2	1	1	1	0.00510204	0.857143	0	1
2013	3	0.0357143	12	3	6	107	social science	0	1	0	1	1	0.00127551	0.369048	1	9
2013	1	0.05	12	2	6	77	social science	0	0	0	0	1	0.0025	0.5	0	1
2013	6	0.666667	5	5	5	13	social science	0	3	3	0	0	0.444444	0.333333	0	36
2013	0	0	11	2	3	77	social science	1	0	0	0	1	0	0.954545	0	0
2013	0	0	9	1	5	18	social science	0	0	0	0	1	0	1	0	0
2013	18	0.5	13	22	7	50	social science	1	5	1	4	0	0.25	0.444444	1	324
2013	5	0.217391	6	6	4	30	social science	0	1	0	1	1	0.047259	0.73913	1	25
2013	10	0.454545	11	7	4	36	social science	1	0	0	0	1	0.206612	0.454545	0	100
2013	28	0.666667	9	3	6	55	social science	1	2	1	1	0	0.444444	0.309524	0	784
2013	29	0.935484	9	13	6	51	social science	1	6	6	0	0	0.87513	0.0645161	0	841
2013	4	0.4	10	3	0	28	social science	1	0	0	0	1	0.16	0.5	0	16
2013	13	0.419355	8	3	7	53	social science	1	1	1	0	1	0.175858	0.387097	0	169
2013	0	0	17	1	3	33	social science	0	0	0	0	1	0	0.961538	0	0
2013	0	0	14	2	6	35	social science	0	0	0	0	1	0	0.928571	0	0
2013	3	0.230769	41	3	0	31	social science	0	4	0	4	1	0.0532544	0.384615	1	9
2013	1	0.05	35	2	0	34	social science	1	0	0	0	1	0.0025	0.55	0	1
2013	1	0.111111	22	5	0	26	social science	1	1	0	1	1	0.0123457	0.777778	1	1
2013	0	0	37	2	0	51	social science	1	0	0	0	1	0	0.638889	0	0
2013	0	0	36	3	0	56	social science	1	0	0	0	1	0	0.926829	0	0
2013	7	0.159091	22	5	4	49	social science	1	3	0	3	1	0.0253099	0.772727	1	49
2013	10	0.208333	24	3	3	56	social science	1	3	1	2	1	0.0434028	0.791667	1	100
2013	5	0.1	8	3	0	65	social science	1	0	0	0	1	0.01	0.2	0	25
2013	20	0.689655	7	3	0	49	social science	0	0	0	0	0	0.475624	0	0	400
2013	2	0.333333	6	2	0	23	social science	0	0	0	0	1	0.111111	0	0	4
2013	2	0.0194175	41	2	0	120	social science	1	1	0	1	1	0.000377038	0.825243	1	4
2013	0	0	28	3	4	44	social science	1	0	0	0	1	0	0.536585	0	0
2013	0	0	26	2	6	40	social science	1	0	0	0	1	0	0.727273	0	0
2013	0	0	14	3	4	34	social science	1	1	0	1	1	0	0.941176	1	0
2013	0	0	10	3	5	34	social science	1	0	0	0	1	0	0.962963	0	0
2013	0	0	12	2	3	32	social science	1	1	0	1	1	0	0.92	1	0
2013	0	0	10	1	4	18	social science	0	0	0	0	1	0	0.846154	0	0
2013	0	0	15	1	5	16	social science	0	0	0	0	1	0	1	0	0
2013	1	0.0217391	9	4	3	62	social science	1	1	0	1	1	0.00047259	0.869565	1	1
2013	0	0	5	3	4	25	social science	0	1	0	1	1	0	0.611111	1	0
2013	9	0.36	6	2	6	29	social science	0	2	0	2	1	0.1296	0.6	1	81
2013	0	0	7	2	5	49	social science	0	0	0	0	1	0	0.827586	0	0
2013	0	0	5	2	7	21	social science	0	0	0	0	1	0	1	0	0
2013	6	0.272727	7	3	3	36	social science	0	0	0	0	1	0.0743802	0.272727	0	36
2013	0	0	4	3	6	11	social science	0	0	0	0	1	0	0.7	0	0
2013	3	0.15	14	2	3	30	social science	1	0	0	0	1	0.0225	0.4	0	9
2013	4	0.190476	8	2	6	21	social science	0	0	0	0	1	0.0362812	0.761905	0	16
2013	19	0.513514	7	4	4	47	social science	0	6	4	2	0	0.263696	0.378378	0	361
2013	0	0	8	2	4	56	social science	0	1	1	0	1	0	1	0	0
2013	8	0.205128	10	3	5	44	social science	0	0	0	0	1	0.0420776	0.769231	0	64
2013	18	0.461538	8	3	4	49	social science	0	0	0	0	1	0.213018	0.230769	0	324
2013	0	0	6	3	5	19	social science	0	0	0	0	1	0	0	0	0
2013	0	0	7	2	5	29	social science	0	2	0	2	1	0	0.64	1	0
2013	1	0.125	6	2	6	22	social science	0	0	0	0	1	0.015625	0.625	0	1
2013	0	0	11	2	5	16	social science	1	0	0	0	1	0	0.6	0	0
2013	2	0.0487805	6	2	8	50	social science	0	0	0	0	1	0.00237954	0.853659	0	4
2013	0	0	6	3	4	15	social science	1	0	0	0	1	0	1	0	0
2013	0	0	7	2	5	30	social science	0	0	0	0	1	0	0.517241	0	0
2013	1	0.125	9	2	6	20	social science	0	0	0	0	1	0.015625	0.5	0	1
2013	0	0	1	2	0	1	social science	1	0	0	0	1	0	1	0	0
2013	1	0.047619	13	4	3	27	social science	1	0	0	0	1	0.00226757	0.904762	0	1
2013	1	0.1	13	2	5	19	social science	1	0	0	0	1	0.01	0.9	0	1
2013	0	0	21	3	5	39	social science	0	0	0	0	1	0	0.73913	0	0
2013	0	0	16	4	6	25	social science	1	1	0	1	1	0	0.454545	1	0
2013	2	0.153846	23	4	7	28	social science	0	0	0	0	1	0.0236686	0.846154	0	4
2013	0	0	18	2	5	41	social science	0	0	0	0	1	0	0.205882	0	0
2013	0	0	9	1	0	58	social science	0	0	0	0	1	0	0.9	0	0
2013	1	0.1	12	1	5	23	social science	0	0	0	0	1	0.01	0.6	0	1
2013	0	0	13	1	5	16	social science	0	0	0	0	1	0	1	0	0
2013	0	0	10	1	5	11	social science	0	0	0	0	1	0	0	0	0
2013	0	0	11	1	5	18	social science	0	0	0	0	1	0	0.75	0	0
2013	0	0	37	3	0	29	social science	1	0	0	0	1	0	0.478261	0	0
2013	0	0	23	2	2	25	social science	1	1	0	1	1	0	0.8	1	0
2013	22	0.458333	14	6	5	60	social science	1	0	0	0	1	0.210069	0.4375	0	484
2013	1	0.0188679	16	4	4	65	social science	0	0	0	0	1	0.000355999	0.867925	0	1
2013	0	0	25	1	0	67	humanities	0	0	0	0	1	0		0	0
2013	0	0	3	4	4	13	social science	1	0	0	0	1	0	1	0	0
2013	1	0.111111	7	9	4	22	social science	1	2	0	2	1	0.0123457	0.888889	1	1
2013	5	0.277778	5	10	4	25	social science	1	0	0	0	1	0.0771605	0.722222	0	25
2013	3	0.6	6	5	6	14	social science	1	1	0	1	0	0.36	0.4	1	9
2013	8	0.32	7	8	4	35	social science	1	12	10	2	1	0.1024	0.68	0	64
2013	8	0.5	8	5	7	26	social science	1	0	0	0	0	0.25	0.375	0	64
2013	4	0.105263	8	3	6	44	social science	1	2	0	2	1	0.0110803	0.868421	1	16
2013	4	0.363636	30	1	0	42	social science	0	0	0	0	1	0.132231	0.545455	0	16
2013	1	0.05	26	1	0	40	social science	0	0	0	0	1	0.0025	0.95	0	1
2013	2	0.5	30	2	0	21	social science	0	1	1	0	0	0.25	0.25	0	4
2013	0	0	24	2	6	67	social science	1	0	0	0	1	0	0.727273	0	0
2013	0	0	34	3	0	38	social science	1	1	0	1	1	0	0.925926	1	0
2013	0	0	5	1	8	15	social science	0	0	0	0	1	0	1	0	0
2013	0	0	19	2	3	22	social science	0	0	0	0	1	0	1	0	0
2013	9	0.375	9	2	3	28	social science	0	0	0	0	1	0.140625	0.625	0	81
2013	0	0	29	1	6	52	social science	0	0	0	0	1	0	1	0	0
2013	0	0	22	1	4	27	social science	0	0	0	0	1	0	1	0	0
2013	0	0	8	2	0	17	social science	1	0	0	0	1	0	1	0	0
2013	0	0	8	1	5	43	social science	1	5	0	5	1	0	0.4	1	0
2013	1	0.333333	37	1	0	58	social science	0	0	0	0	1	0.111111	0.333333	0	1
2013	0	0	29	3	9	33	social science	1	0	0	0	1	0	0.625	0	0
2013	1	0.04	14	2	3	28	social science	0	0	0	0	1	0.0016	0.52	0	1
2013	1	0.125	14	1	5	23	humanities	0	0	0	0	1	0.015625	0.75	0	1
2013	0	0	24	1	6	49	social science	0	0	0	0	1	0	1	0	0
2013	0	0	29	1	6	43	social science	0	0	0	0	1	0	1	0	0
2013	0	0	29	1	7	50	social science	0	1	0	1	1	0	1	1	0
2013	0	0	21	1	5	37	social science	0	0	0	0	1	0	1	0	0
2013	0	0	24	1	0	2	social science	0	0	0	0	1	0	1	0	0
2013	3	0.1875	32	1	6	47	humanities	0	1	0	1	1	0.0351562		1	9
2013	0	0	8	1	0	19	humanities	0	0	0	0	1	0		0	0
2013	0	0	6	1	0	11	humanities	0	0	0	0	1	0		0	0
2013	0	0	7	3	0	17	humanities	0	0	0	0	1	0		0	0
2013	2	0.08	18	1	7	55	social science	1	0	0	0	1	0.0064	0.4	0	4
2013	0	0	12	2	3	18	social science	0	0	0	0	1	0	1	0	0
2013	0	0	3	2	0	6	social science	0	0	0	0	1	0	1	0	0
2013	0	0	18	4	0	17	humanities	1	0	0	0	1	0	0.75	0	0
2013	7	0.35	22	3	0	60	social science	1	0	0	0	1	0.1225	0.55	0	49
2013	18	0.642857	14	4	0	39	social science	0	0	0	0	0	0.413265	0.357143	0	324
2013	0	0	8	3	0	18	social science	1	0	0	0	1	0	0.875	0	0
2013	15	0.625	14	5	7	62	social science	1	0	0	0	0	0.390625	0.375	0	225
2013	0	0	9	1	0	53	social science	0	0	0	0	1	0	1	0	0
2013	10	1	4	5	4	18	social science	1	0	0	0	0	1	0	0	100
2013	4	0.5	17	7	6	22	social science	0	0	0	0	0	0.25	0.5	0	16
2013	0	0	31	3	0	56	social science	0	1	0	1	1	0	0.6	1	0
2013	0	0	26	1	5	30	social science	0	0	0	0	1	0	1	0	0
2013	0	0	28	2	4	15	social science	1	0	0	0	1	0	0.928571	0	0
2013	1	0.0555556	14	4	3	31	social science	1	2	0	2	1	0.00308642	0.611111	1	1
2013	0	0	21	1	7	65	social science	0	0	0	0	1	0	1	0	0
2013	0	0	18	2	5	18	social science	0	0	0	0	1	0	0.923077	0	0
2013	0	0	15	2	3	41	social science	1	0	0	0	1	0	0.666667	0	0
2013	0	0	8	2	0	27	social science	1	0	0	0	1	0	0.545455	0	0
2013	0	0	17	3	0	26	social science	1	0	0	0	1	0	0.375	0	0
2013	4	0.153846	6	5	4	29	social science	1	1	0	1	1	0.0236686	0.769231	1	16
2013	7	0.12963	11	5	7	79	social science	1	1	0	1	1	0.0168038	0.833333	1	49
2013	0	0	8	1	0	11	social science	0	0	0	0	1	0	1	0	0
2013	1	0.037037	22	3	6	71	social science	1	0	0	0	1	0.00137174	0.777778	0	1
2013	6	0.214286	11	5	6	30	social science	1	0	0	0	1	0.0459184	0.785714	0	36
2013	18	0.818182	11	6	6	26	social science	1	0	0	0	0	0.669421	0.136364	0	324
2013	6	0.4	15	3	3	26	social science	0	0	0	0	1	0.16	0.2	0	36
2013	4	0.307692	17	2	4	50	social science	1	0	0	0	1	0.0946746	0.461538	0	16
2013	0	0	19	2	5	30	social science	1	0	0	0	1	0	0.933333	0	0
2013	0	0	12	2	3	30	social science	0	0	0	0	1	0	0.5	0	0
2013	0	0	13	1	5	40	social science	0	0	0	0	1	0	0.384615	0	0
2013	0	0	14	1	5	24	social science	0	0	0	0	1	0	0.333333	0	0
2013	0	0	15	1	4	28	social science	0	1	0	1	1	0	1	1	0
2013	2	0.0952381	11	2	5	35	social science	1	1	1	0	1	0.0090703	0.52381	0	4
2013	2	0.4	15	1	3	26	social science	0	0	0	0	1	0.16	0.6	0	4
2013	3	0.111111	17	2	8	60	social science	0	0	0	0	1	0.0123457	0.888889	0	9
2013	10	0.555556	10	2	7	67	social science	1	0	0	0	0	0.308642	0.388889	0	100
2013	0	0	20	5	7	24	social science	1	1	0	1	1	0	0.125	1	0
2013	0	0	22	2	7	35	social science	1	0	0	0	1	0	1	0	0
2013	0	0	11	1	0	47	social science	0	0	0	0	1	0	0.633333	0	0
2013	4	0.5	4	4	0	10	social science	0	0	0	0	0	0.25	0.375	0	16
2013	0	0	29	2	5	102	social science	1	0	0	0	1	0	0.470588	0	0
2013	2	0.166667	19	3	5	51	social science	1	0	0	0	1	0.0277778	0.75	0	4
2013	0	0	30	3	7	72	social science	1	0	0	0	1	0	0.815789	0	0
2013	0	0	14	3	3	37	social science	1	2	0	2	1	0	1	1	0
2013	0	0	7	5	6	10	social science	0	0	0	0	1	0	1	0	0
2013	0	0	10	2	7	25	social science	0	1	0	1	1	0	0.875	1	0
2013	3	0.0857143	8	6	7	45	social science	0	1	0	1	1	0.00734694	0.857143	1	9
2013	0	0	16	3	4	19	social science	0	0	0	0	1	0	1	0	0
2013	0	0	24	2	3	51	social science	0	0	0	0	1	0	1	0	0
2013	1	0.1	18	2	3	23	social science	0	0	0	0	1	0.01	0.5	0	1
2013	6	0.26087	22	4	6	39	social science	1	1	0	1	1	0.0680529	0.565217	1	36
2013	0	0	21	2	4	24	social science	0	1	0	1	1	0	1	1	0
2013	0	0	31	1	0	68	social science	0	3	0	3	1	0	0.8	1	0
2013	0	0	3	1	0	2	social science	0	0	0	0	1	0	1	0	0
2013	0	0	26	3	0	60	social science	1	0	0	0	1	0	0.906977	0	0
2013	1	0.0909091	19	1	5	15	social science	0	1	0	1	1	0.00826446	0.818182	1	1
2013	0	0	15	2	4	10	social science	0	0	0	0	1	0	1	0	0
2013	22	0.4	18	1	5	64	social science	0	2	2	0	1	0.16	0.527273	0	484
2013	1	0.0833333	15	2	3	34	social science	0	0	0	0	1	0.00694444	0.25	0	1
2013	0	0	12	2	5	31	social science	0	0	0	0	1	0	0.1875	0	0
2013	7	0.7	9	8	3	22	social science	0	0	0	0	0	0.49	0.3	0	49
2013	5	0.294118	20	1	0	26	social science	0	0	0	0	1	0.0865052	0.647059	0	25
2013	4	0.057971	11	2	0	104	social science	0	0	0	0	1	0.00336064	0.217391	0	16
2013	20	0.606061	15	5	0	58	social science	0	0	0	0	0	0.367309	0.30303	0	400
2013	0	0	11	2	7	68	social science	0	0	0	0	1	0	0.866667	0	0
2013	1	0.0277778	14	2	5	58	social science	1	0	0	0	1	0.000771605	0.916667	0	1
2013	30	0.211268	42	2	0	215	social science	1	1	0	1	1	0.044634	0.725352	1	900
2013	0	0	12	3	0	10	social science	1	0	0	0	1	0	0	0	0
2013	16	0.695652	5	2	0	52	humanities	1	0	0	0	0	0.483932		0	256
2013	0	0	20	2	6	28	social science	1	1	0	1	1	0	0.541667	1	0
2013	0	0	3	3	3	2	social science	0	0	0	0	1	0	1	0	0
2013	0	0	13	1	6	48	social science	0	1	0	1	1	0	0.888889	1	0
2013	1	0.166667	5	3	5	6	social science	0	0	0	0	1	0.0277778	0.5	0	1
2013	2	0.125	4	3	4	28	social science	0	0	0	0	1	0.015625	0.625	0	4
2013	1	0.0769231	11	1	0	53	social science	0	0	0	0	1	0.00591716	0.846154	0	1
2013	0	0	5	1	0	10	social science	0	0	0	0	1	0	1	0	0
2013	0	0	15	2	6	22	social science	1	0	0	0	1	0	0.833333	0	0
2013	0	0	18	2	5	41	social science	0	0	0	0	1	0	0.657143	0	0
2013	14	0.823529	20	4	7	26	social science	0	0	0	0	0	0.678201	0.117647	0	196
2013	20	0.769231	22	3	7	45	social science	0	4	4	0	0	0.591716	0.115385	0	400
2013	33	0.825	17	3	5	44	social science	0	0	0	0	0	0.680625	0.025	0	1089
2013	13	0.433333	9	2	6	35	social science	1	0	0	0	1	0.187778	0.533333	0	169
2013	0	0	28	3	4	88	social science	1	1	0	1	1	0	0.960784	1	0
2013	1	0.0322581	28	3	6	45	social science	1	0	0	0	1	0.00104058	0.709677	0	1
2013	0	0	28	3	5	40	social science	1	0	0	0	1	0	0.962963	0	0
2013	0	0	11	3	0	34	social science	0	0	0	0	1	0	1	0	0
2013	1	0.0138889	14	2	12	99	social science	0	2	0	2	1	0.000192901	0.833333	1	1
2013	1	0.0138889	15	2	12	99	social science	0	0	0	0	1	0.000192901	0.833333	0	1
2013	2	0.142857	22	2	7	34	social science	1	0	0	0	1	0.0204082	0.785714	0	4
2013	0	0	6	2	5	10	social science	1	0	0	0	1	0	1	0	0
2013	0	0	20	2	5	27	social science	0	5	0	5	1	0	1	1	0
2013	0	0	20	2	7	66	social science	1	4	0	4	1	0	1	1	0
2013	1	0.0769231	19	2	7	45	social science	0	0	0	0	1	0.00591716	0.615385	0	1
2013	3	0.428571	26	2	7	29	social science	0	1	0	1	1	0.183673	0.285714	1	9
2013	0	0	25	3	6	55	social science	1	1	1	0	1	0	0.472222	0	0
2013	3	0.2	24	5	6	55	social science	1	1	0	1	1	0.04	0.666667	1	9
2013	1	0.0769231	20	7	4	26	social science	1	1	0	1	1	0.00591716	0.538462	1	1
2013	1	0.0222222	22	3	0	63	social science	1	0	0	0	1	0.000493827	0.355556	0	1
2013	3	1	13	4	4	17	social science	0	0	0	0	0	1	0	0	9
2013	6	1	10	3	5	27	social science	0	0	0	0	0	1	0	0	36
2013	19	0.95	12	4	6	42	social science	0	0	0	0	0	0.9025	0.05	0	361
2013	19	0.633333	11	3	6	38	social science	0	0	0	0	0	0.401111	0.3	0	361
2013	0	0	12	3	6	77	social science	1	0	0	0	1	0	0.790323	0	0
2013	0	0	13	4	8	56	social science	1	1	0	1	1	0	0.956522	1	0
2013	0	0	21	3	6	47	social science	1	0	0	0	1	0	0.46875	0	0
2013	0	0	27	4	5	59	social science	0	1	0	1	1	0	0.357143	1	0
2013	0	0	18	2	4	39	social science	1	3	0	3	1	0	0.294118	1	0
2013	1	0.0384615	21	2	5	38	social science	0	0	0	0	1	0.00147929	0.423077	0	1
2013	0	0	12	2	6	32	social science	0	0	0	0	1	0	0.809524	0	0
2013	2	0.117647	30	1	0	54	social science	0	0	0	0	1	0.0138408	0.823529	0	4
2013	0	0	26	2	0	70	social science	1	0	0	0	1	0	0.5	0	0
2013	0	0	12	1	0	63	social science	0	0	0	0	1	0	0.894737	0	0
2013	17	0.566667	10	4	7	38	social science	1	2	1	1	0	0.321111	0.4	0	289
2013	3	0.1	8	4	2	37	social science	1	1	1	0	1	0.01	0.466667	0	9
2013	7	0.184211	10	6	6	45	social science	1	0	0	0	1	0.0339335	0.789474	0	49
2013	11	0.244444	10	1	5	60	social science	0	0	0	0	1	0.0597531	0.422222	0	121
2013	1	0.0333333	15	5	8	64	social science	1	1	0	1	1	0.00111111	0.6	1	1
2013	8	0.25	21	1	5	56	social science	0	1	0	1	1	0.0625	0.3125	1	64
2013	2	0.08	17	4	6	34	social science	1	0	0	0	1	0.0064	0.12	0	4
2013	4	0.0833333	24	2	6	62	social science	0	0	0	0	1	0.00694444	0.145833	0	16
2013	1	0.125	16	1	3	9	social science	0	0	0	0	1	0.015625	0.125	0	1
2013	1	0.0769231	17	2	6	21	social science	0	0	0	0	1	0.00591716	0.846154	0	1
2013	6	0.6	18	3	6	38	social science	0	0	0	0	0	0.36	0.3	0	36
2013	0	0	25	2	4	40	social science	1	0	0	0	1	0	0.56	0	0
2013	8	0.2	9	1	8	48	social science	0	0	0	0	1	0.04	0.725	0	64
2013	11	0.34375	9	5	6	50	social science	1	0	0	0	1	0.118164	0.09375	0	121
2013	0	0	9	4	6	28	social science	1	11	0	11	1	0	0.857143	1	0
2013	20	0.3125	34	3	0	77	humanities	0	0	0	0	1	0.0976562		0	400
2013	16	0.8	19	4	0	39	social science	0	0	0	0	0	0.64	0.05	0	256
2013	0	0	10	1	0	37	social science	0	0	0	0	1	0	0.875	0	0
2013	2	0.0540541	8	4	3	45	social science	1	0	0	0	1	0.00292184	0.486486	0	4
2013	21	0.552632	8	2	5	54	social science	0	4	1	3	0	0.305402	0.0263158	1	441
2013	2	0.153846	6	2	7	62	social science	0	0	0	0	1	0.0236686	0	0	4
2013	0	0	18	2	6	80	social science	0	0	0	0	1	0	0.833333	0	0
2013	7	0.0985916	13	3	6	90	social science	0	0	0	0	1	0.00972029	0.704225	0	49
2013	3	0.142857	16	1	4	54	social science	0	0	0	0	1	0.0204082	0.571429	0	9
2013	23	0.377049	17	3	6	82	social science	1	0	0	0	1	0.142166	0.278689	0	529
2013	4	0.0784314	17	4	8	69	social science	1	2	1	1	1	0.00615148	0.823529	0	16
2013	17	0.293103	19	3	11	74	social science	1	8	4	4	1	0.0859096	0.431034	0	289
2013	37	0.345794	24	3	8	162	social science	1	3	2	1	1	0.119574	0.439252	0	1369
2013	6	0.176471	15	3	7	53	social science	1	1	0	1	1	0.0311419	0.529412	1	36
2013	19	0.475	16	2	8	48	social science	1	0	0	0	1	0.225625	0.425	0	361
2013	0	0	20	2	4	38	social science	0	0	0	0	1	0	1	0	0
2013	6	0.666667	16	2	6	43	social science	1	0	0	0	0	0.444444	0.333333	0	36
2013	21	0.7	19	5	6	53	social science	0	0	0	0	0	0.49	0.2	0	441
2013	0	0	22	1	6	47	social science	0	0	0	0	1	0	1	0	0
2013	0	0	19	2	5	64	social science	0	0	0	0	1	0	0.75	0	0
2013	0	0	18	3	0	70	social science	0	1	0	1	1	0	0.868421	1	0
2013	0	0	9	5	5	46	social science	0	0	0	0	1	0	0.833333	0	0
2013	0	0	11	3	3	52	social science	1	1	0	1	1	0	0.945946	1	0
2013	2	0.0357143	11	5	5	78	social science	1	1	0	1	1	0.00127551	0.75	1	4
2013	0	0	22	4	0	60	social science	1	0	0	0	1	0	0.966667	0	0
2013	0	0	21	1	0	81	social science	1	1	0	1	1	0	1	1	0
2013	1	0.0666667	16	1	0	49	social science	0	0	0	0	1	0.00444444	0.866667	0	1
2013	2	0.181818	18	2	0	55	social science	1	0	0	0	1	0.0330579	0.818182	0	4
2013	0	0	19	1	0	52	social science	0	0	0	0	1	0	0.933333	0	0
2013	0	0	18	1	0	37	social science	0	0	0	0	1	0	1	0	0
2013	4	0.173913	10	5	6	28	social science	1	0	0	0	1	0.0302457	0.695652	0	16
2013	0	0	14	4	3	19	social science	1	0	0	0	1	0	0.9375	0	0
2013	0	0	13	2	5	80	social science	0	0	0	0	1	0	0.6	0	0
2013	0	0	22	3	7	65	humanities	1	0	0	0	1	0		0	0
2013	0	0	15	3	5	59	humanities	1	0	0	0	1	0		0	0
2013	2	0.4	9	4	1	16	social science	1	0	0	0	1	0.16	0.6	0	4
2013	47	0.723077	17	2	5	74	social science	1	0	0	0	0	0.52284	0.261538	0	2209
2013	5	0.217391	38	2	6	36	social science	1	1	0	1	1	0.047259	0.73913	1	25
2013	1	0.0416667	12	4	4	35	social science	1	2	0	2	1	0.00173611	0.916667	1	1
2013	0	0	17	2	5	80	social science	0	0	0	0	1	0	0.931035	0	0
2013	0	0	16	5	5	56	social science	1	0	0	0	1	0	0.954545	0	0
2013	2	0.0645161	18	3	3	35	social science	0	0	0	0	1	0.00416233	0.774194	0	4
2013	0	0	13	2	4	52	social science	0	0	0	0	1	0	0.647059	0	0
2013	14	0.518519	11	4	4	45	social science	1	1	0	1	0	0.268861	0.444444	1	196
2013	0	0	15	2	0	25	social science	0	1	0	1	1	0	0.9	1	0
2013	1	0.047619	26	3	5	27	social science	1	0	0	0	1	0.00226757	0.952381	0	1
2013	0	0	20	2	5	21	social science	1	1	0	1	1	0	0.578947	1	0
2013	3	0.05	10	2	5	63	social science	0	0	0	0	1	0.0025	0.916667	0	9
2013	1	0.0714286	4	3	4	16	social science	0	0	0	0	1	0.00510204	0.928571	0	1
2013	0	0	4	2	3	14	social science	0	0	0	0	1	0	1	0	0
2013	1	0.166667	4	4	3	6	social science	1	0	0	0	1	0.0277778	0.833333	0	1
2013	0	0	6	2	5	14	social science	1	0	0	0	1	0	1	0	0
2013	0	0	4	1	3	4	social science	0	0	0	0	1	0	1	0	0
2013	0	0	3	1	5	7	social science	0	0	0	0	1	0	0.75	0	0
2013	0	0	22	3	6	72	social science	1	0	0	0	1	0	0.156863	0	0
2013	0	0	19	3	5	43	social science	1	0	0	0	1	0	0.5	0	0
2013	14	0.518519	7	2	5	40	social science	1	1	1	0	0	0.268861	0.444444	0	196
2013	19	0.59375	10	3	6	42	social science	0	2	1	1	0	0.352539	0.40625	0	361
2013	4	0.222222	10	2	5	38	social science	0	0	0	0	1	0.0493827	0.166667	0	16
2013	0	0	24	2	5	32	social science	1	0	0	0	1	0	0.761905	0	0
2013	6	0.171429	9	2	3	41	social science	0	1	0	1	1	0.0293878	0.571429	1	36
2013	9	0.36	8	5	5	29	social science	1	2	1	1	1	0.1296	0.4	0	81
2013	11	0.733333	5	6	5	22	social science	1	1	1	0	0	0.537778	0.266667	0	121
2013	11	0.5	5	7	0	27	social science	1	3	2	1	0	0.25	0.363636	0	121
2013	4	0.0952381	13	3	0	57	social science	1	1	1	0	1	0.0090703	0.904762	0	16
2013	0	0	17	1	4	38	social science	0	0	0	0	1	0	0.125	0	0
2013	0	0	8	3	3	40	social science	0	0	0	0	1	0	0.833333	0	0
2013	0	0	9	2	4	35	social science	0	1	0	1	1	0	0.5	1	0
2013	0	0	12	1	4	37	social science	0	0	0	0	1	0	0.666667	0	0
2013	0	0	10	3	6	48	social science	1	0	0	0	1	0	0.5	0	0
2013	0	0	11	1	6	50	social science	0	2	0	2	1	0	0.933333	1	0
2013	43	0.728814	7	6	5	65	social science	0	0	0	0	0	0.531169	0.186441	0	1849
2013	0	0	11	4	4	21	social science	0	0	0	0	1	0	1	0	0
2013	0	0	14	2	4	20	social science	0	0	0	0	1	0	0.615385	0	0
2013	0	0	16	3	5	14	social science	1	0	0	0	1	0	1	0	0
2013	0	0	18	2	5	65	social science	1	0	0	0	1	0	0.733333	0	0
2013	2	0.0952381	12	3	3	29	social science	0	0	0	0	1	0.0090703	0.857143	0	4
2013	2	0.0666667	15	2	4	42	social science	1	0	0	0	1	0.00444444	0.866667	0	4
2013	3	0.0857143	10	2	4	55	social science	1	0	0	0	1	0.00734694	0.885714	0	9
2013	0	0	22	1	0	64	humanities	0	0	0	0	1	0	0	0	0
2013	0	0	12	2	6	20	social science	1	0	0	0	1	0	1	0	0
2013	2	0.5	9	2	4	15	social science	1	0	0	0	0	0.25	0.5	0	4
2013	16	0.484849	23	3	7	54	social science	1	1	1	0	1	0.235078	0.484849	0	256
2013	7	0.318182	15	3	6	63	social science	1	0	0	0	1	0.10124	0.5	0	49
2013	10	0.416667	14	3	5	90	social science	0	1	1	0	1	0.173611	0.375	0	100
2013	2	0.0625	8	3	5	49	social science	1	0	0	0	1	0.00390625	0.9375	0	4
2013	19	0.904762	7	8	4	24	social science	0	1	1	0	0	0.818594	0.0952381	0	361
2013	3	0.0882353	15	3	3	40	social science	1	0	0	0	1	0.00778547	0.911765	0	9
2013	3	0.142857	16	2	4	24	social science	1	0	0	0	1	0.0204082	0.809524	0	9
2013	3	0.111111	14	3	5	47	social science	1	2	0	2	1	0.0123457	0.888889	1	9
2013	10	0.357143	28	4	0	43	social science	1	0	0	0	1	0.127551	0.571429	0	100
2013	2	0.2	28	4	0	37	social science	1	0	0	0	1	0.04	0.5	0	4
2013	0	0	14	1	5	41	humanities	0	0	0	0	1	0		0	0
2013	0	0	3	1	0	5	humanities	0	0	0	0	1	0		0	0
2013	0	0	16	1	4	45	humanities	0	0	0	0	1	0		0	0
2013	16	0.340426	13	3	3	58	social science	1	0	0	0	1	0.11589	0.382979	0	256
2013	0	0	30	1	5	33	social science	1	0	0	0	1	0	1	0	0
2013	0	0	30	1	5	67	social science	0	0	0	0	1	0	1	0	0
2013	1	0.03125	15	3	5	53	humanities	1	0	0	0	1	0.000976563		0	1
2013	9	0.428571	15	2	5	21	social science	0	2	0	2	1	0.183673	0.571429	1	81
2013	36	0.878049	14	3	6	48	social science	0	2	1	1	0	0.77097	0.121951	0	1296
2013	15	0.681818	17	3	7	27	social science	0	1	1	0	0	0.464876	0.318182	0	225
2013	9	0.409091	16	4	4	24	social science	0	1	0	1	1	0.167355	0.545455	1	81
2013	1	0.5	4	5	0	3	social science	1	0	0	0	0	0.25	0.5	0	1
2013	0	0	7	3	4	17	social science	0	0	0	0	1	0	0.0909091	0	0
2013	0	0	21	2	5	66	social science	1	1	0	1	1	0	1	1	0
2013	0	0	23	3	5	46	social science	0	1	0	1	1	0	0.625	1	0
2013	7	0.777778	8	7	4	23	social science	1	5	3	2	0	0.604938	0.111111	0	49
2013	11	0.6875	10	9	4	28	social science	1	3	2	1	0	0.472656	0.1875	0	121
2013	26	0.52	11	4	6	57	social science	1	0	0	0	0	0.2704	0.46	0	676
2013	0	0	59	1	0	199	social science	1	4	0	4	1	0	0.288462	1	0
2013	7	0.636364	19	2	5	23	social science	1	0	0	0	0	0.404959	0.363636	0	49
2013	6	0.230769	15	2	5	33	social science	0	1	0	1	1	0.0532544	0.769231	1	36
2013	0	0	4	1	0	15	social science	0	1	0	1	1	0	1	1	0
2013	1	0.03125	5	6	4	39	social science	1	6	1	5	1	0.000976563	0.59375	1	1
2013	35	0.972222	11	14	0	40	social science	0	6	6	0	0	0.945216	0.0277778	0	1225
2013	0	0	15	1	5	17	social science	0	0	0	0	1	0	0.363636	0	0
2013	0	0	19	4	4	33	social science	1	0	0	0	1	0	0.933333	0	0
2013	14	0.311111	28	3	0	72	social science	1	2	1	1	1	0.0967901	0.0666667	0	196
2013	2	0.0714286	10	1	2	38	social science	0	0	0	0	1	0.00510204	0.5	0	4
2013	1	0.2	16	2	5	29	social science	0	0	0	0	1	0.04	0.6	0	1
2013	1	0.027027	27	5	3	73	social science	0	0	0	0	1	0.00073046	0.972973	0	1
2013	5	0.5	11	3	6	36	social science	1	2	2	0	0	0.25	0.4	0	25
2013	0	0	22	3	0	40	social science	0	0	0	0	1	0	0.105263	0	0
2013	2	0.0363636	11	3	5	69	social science	1	1	0	1	1	0.00132231	0.0727273	1	4
2013	3	0.0545455	13	1	6	81	social science	0	1	0	1	1	0.00297521	0.290909	1	9
2013	2	0.05	17	5	5	49	social science	1	3	0	3	1	0.0025	0.85	1	4
2013	18	0.352941	8	3	0	64	social science	1	0	0	0	1	0.124567	0.352941	0	324
2013	15	0.441176	12	5	0	41	social science	1	0	0	0	1	0.194637	0.558824	0	225
2013	0	0	31	2	5	20	social science	1	1	0	1	1	0	0.75	1	0
2013	0	0	19	5	4	53	social science	0	0	0	0	1	0	0.823529	0	0
2013	0	0	40	3	0	84	social science	1	1	0	1	1	0	0.444444	1	0
2013	0	0	41	3	0	54	social science	1	1	0	1	1	0	0.181818	1	0
2013	26	0.866667	8	2	5	36	humanities	0	0	0	0	0	0.751111	0.0333333	0	676
2013	20	0.487805	14	1	5	62	humanities	0	2	0	2	1	0.237954	0.0731707	1	400
2013	0	0	19	2	0	25	social science	1	0	0	0	1	0	0.9	0	0
2013	2	0.0416667	18	4	6	80	social science	1	1	0	1	1	0.00173611	0.166667	1	4
2013	1	0.0526316	16	2	5	38	social science	0	0	0	0	1	0.00277008	0.736842	0	1
2013	7	0.104478	16	2	5	89	social science	0	3	0	3	1	0.0109156	0.641791	1	49
2013	22	0.52381	10	1	7	53	social science	0	2	0	2	0	0.274376	0.333333	1	484
2013	3	0.75	2	1	0	5	social science	0	0	0	0	0	0.5625	0.25	0	9
2013	0	0	14	5	7	38	social science	1	0	0	0	1	0	0.827586	0	0
2013	1	0.0588235	7	4	0	25	social science	1	2	0	2	1	0.00346021	0.941176	1	1
2013	1	0.0188679	16	2	5	85	social science	1	0	0	0	1	0.000355999	0.962264	0	1
2013	0	0	19	5	4	58	social science	0	0	0	0	1	0	0.818182	0	0
2013	1	0.0178571	18	3	6	72	social science	0	3	0	3	1	0.000318878	0.875	1	1
2013	2	0.0588235	14	2	4	48	social science	0	1	0	1	1	0.00346021	0.735294	1	4
2013	0	0	19	4	3	37	social science	1	6	0	6	1	0	0.833333	1	0
2013	0	0	17	2	5	67	social science	1	1	0	1	1	0	0.943396	1	0
2013	0	0	24	3	4	53	social science	0	0	0	0	1	0	0.823529	0	0
2013	0	0	25	2	3	65	social science	0	1	0	1	1	0	0.823529	1	0
2013	0	0	16	3	5	46	social science	0	4	0	4	1	0	0.862069	1	0
2013	5	0.138889	28	1	4	95	social science	0	1	0	1	1	0.0192901	0.777778	1	25
2013	0	0	17	4	0	101	social science	1	1	0	1	1	0	0.609195	1	0
2013	0	0	18	6	6	19	social science	1	0	0	0	1	0	0.846154	0	0
2013	0	0	15	2	5	69	social science	0	2	0	2	1	0	0.925926	1	0
2013	23	0.71875	8	4	5	46	social science	0	0	0	0	0	0.516602	0.1875	0	529
2013	2	0.1	8	3	5	44	social science	1	0	0	0	1	0.01	0.7	0	4
2013	0	0	17	4	4	121	social science	1	4	0	4	1	0	0.432836	1	0
2013	1	0.0243902	27	4	5	53	social science	0	0	0	0	1	0.000594884	0.804878	0	1
2013	1	0.0175439	23	4	5	77	social science	1	0	0	0	1	0.000307787	0.701754	0	1
2013	2	0.0909091	8	4	0	41	social science	1	0	0	0	1	0.00826446	0.909091	0	4
2013	2	0.0425532	15	4	0	56	social science	1	0	0	0	1	0.00181077	0.93617	0	4
2013	10	0.243902	11	2	3	59	social science	0	0	0	0	1	0.0594884	0.536585	0	100
2013	7	0.35	10	4	3	42	social science	1	0	0	0	1	0.1225	0.6	0	49
2013	7	0.538462	12	3	2	31	social science	1	0	0	0	0	0.289941	0.307692	0	49
2013	3	0.230769	7	3	4	20	social science	0	1	0	1	1	0.0532544	0.769231	1	9
2013	0	0	13	2	5	37	social science	1	0	0	0	1	0	1	0	0
2013	1	0.0454545	9	3	3	28	social science	0	0	0	0	1	0.00206612	0.954545	0	1
2013	1	0.0909091	9	2	7	21	social science	1	0	0	0	1	0.00826446	0.545455	0	1
2013	4	0.142857	11	1	4	30	social science	0	3	2	1	1	0.0204082	0.857143	0	16
2013	1	0.03125	16	1	5	46	social science	0	0	0	0	1	0.000976563	0.28125	0	1
2013	0	0	17	3	0	25	social science	1	0	0	0	1	0	0.952381	0	0
2013	0	0	16	4	5	29	social science	0	1	0	1	1	0	0.96	1	0
2013	6	0.6	11	1	0	19	social science	0	0	0	0	0	0.36	0.4	0	36
2013	0	0	6	3	0	18	social science	1	0	0	0	1	0	0.941176	0	0
2013	3	0.1875	12	2	4	25	social science	1	0	0	0	1	0.0351562	0.75	0	9
2013	1	0.0238095	13	3	6	53	social science	1	3	0	3	1	0.000566893	0.880952	1	1
2013	0	0	24	1	5	73	social science	0	0	0	0	1	0	0.878788	0	0
2013	5	0.166667	27	4	5	91	social science	1	0	0	0	1	0.0277778	0.666667	0	25
2013	2	0.0740741	19	3	6	54	social science	1	0	0	0	1	0.00548697	0.62963	0	4
2013	0	0	21	3	2	49	social science	1	0	0	0	1	0	1	0	0
2013	0	0	19	3	0	26	social science	1	0	0	0	1	0	0.684211	0	0
2013	0	0	19	1	5	44	social science	0	0	0	0	1	0	0.821429	0	0
2013	4	0.148148	19	3	0	36	social science	1	3	1	2	1	0.0219479	0.740741	1	16
2013	1	0.0434783	11	3	5	32	social science	1	1	1	0	1	0.00189036	0.956522	0	1
2013	0	0	15	1	5	73	social science	0	1	0	1	1	0	1	1	0
2013	0	0	17	1	7	114	social science	0	0	0	0	1	0	1	0	0
2013	5	0.142857	18	3	3	80	social science	0	0	0	0	1	0.0204082	0.4	0	25
2013	13	1	19	3	5	26	social science	1	0	0	0	0	1	0	0	169
2013	0	0	9	3	4	34	social science	1	5	0	5	1	0	0.92	1	0
2013	0	0	13	3	3	45	social science	1	2	0	2	1	0	0.545455	1	0
2013	0	0	19	3	3	39	social science	1	1	0	1	1	0	0.555556	1	0
2013	0	0	14	2	5	21	social science	0	0	0	0	1	0	0.357143	0	0
2013	0	0	15	3	5	40	social science	0	1	0	1	1	0	0.315789	1	0
2013	3	0.166667	10	3	4	29	social science	0	1	0	1	1	0.0277778	0.444444	1	9
2013	3	0.15	15	3	0	31	humanities	1	1	1	0	1	0.0225		0	9
2013	0	0	21	3	5	86	social science	1	1	0	1	1	0	0.242424	1	0
2013	5	0.172414	17	3	6	44	social science	1	0	0	0	1	0.0297265	0.689655	0	25
2013	0	0	17	3	5	68	social science	0	1	0	1	1	0	0.315789	1	0
2013	0	0	27	4	5	69	humanities	1	0	0	0	1	0		0	0
2013	0	0	15	4	5	38	social science	1	0	0	0	1	0	1	0	0
2013	0	0	23	4	4	35	social science	1	0	0	0	1	0	0.714286	0	0
2013	2	0.25	26	1	8	57	social science	1	1	0	1	1	0.0625	0.375	1	4
2013	16	0.533333	19	1	0	54	social science	1	1	0	1	0	0.284444	0.233333	1	256
2013	3	0.3	16	5	0	15	social science	0	0	0	0	1	0.09	0.1	0	9
2013	11	0.733333	13	1	4	18	social science	0	1	1	0	0	0.537778	0.266667	0	121
2013	1	0.0526316	16	4	6	39	social science	1	0	0	0	1	0.00277008	0.947368	0	1
2013	0	0	19	2	5	39	social science	1	0	0	0	1	0	0.851852	0	0
2013	0	0	28	1	0	80	social science	0	3	0	3	1	0	0.888889	1	0
2013	0	0	24	1	0	117	social science	1	1	0	1	1	0	1	1	0
2013	3	0.107143	24	2	6	41	social science	1	1	0	1	1	0.0114796	0.678571	1	9
2013	2	0.133333	8	3	5	28	social science	1	0	0	0	1	0.0177778	0.666667	0	4
2013	7	0.0786517	24	3	4	153	social science	0	0	0	0	1	0.00618609	0.898876	0	49
2013	1	0.2	7	1	5	16	social science	0	1	0	1	1	0.04	0.8	1	1
2013	13	0.342105	10	3	6	48	social science	0	3	0	3	1	0.117036	0.184211	1	169
2013	25	0.471698	13	4	6	93	social science	1	5	0	5	1	0.222499	0.150943	1	625
2013	6	0.1	13	11	5	97	social science	1	3	0	3	1	0.01	0.783333	1	36
2013	11	0.423077	18	2	6	54	social science	1	1	0	1	1	0.178994	0.230769	1	121
2013	2	0.0769231	7	4	4	61	social science	1	0	0	0	1	0.00591716	0.653846	0	4
2013	0	0	7	2	7	46	social science	1	0	0	0	1	0	0.6	0	0
2013	6	0.3	7	3	6	43	social science	1	0	0	0	1	0.09	0.45	0	36
2013	0	0	8	2	5	33	social science	1	1	0	1	1	0	1	1	0
2013	1	0.0294118	8	3	5	58	social science	0	1	0	1	1	0.000865052	0.705882	1	1
2013	3	0.125	8	2	6	33	social science	0	1	0	1	1	0.015625	0.833333	1	9
2013	0	0	13	3	7	32	social science	1	2	0	2	1	0	1	1	0
2013	19	0.487179	12	3	5	45	social science	1	0	0	0	1	0.237344	0.461538	0	361
2013	0	0	12	3	4	97	social science	0	2	0	2	1	0	0.966667	1	0
2013	2	0.117647	7	4	4	50	social science	0	1	0	1	1	0.0138408	0.294118	1	4
2013	0	0	12	4	6	68	social science	1	1	0	1	1	0	0.588235	1	0
2013	0	0	11	3	4	69	social science	1	0	0	0	1	0	1	0	0
2013	4	0.173913	11	2	6	64	social science	0	0	0	0	1	0.0302457	0.695652	0	16
2013	3	0.107143	13	5	5	62	social science	1	1	1	0	1	0.0114796	0.857143	0	9
2013	6	0.0983607	11	4	6	96	social science	1	3	0	3	1	0.00967482	0.688525	1	36
2013	2	0.05	20	1	6	79	social science	0	2	0	2	1	0.0025	0.9	1	4
2013	0	0	16	2	6	24	social science	1	0	0	0	1	0	0.944444	0	0
2013	1	0.0153846	17	5	6	91	social science	1	0	0	0	1	0.000236686	0.938462	0	1
2013	2	0.0606061	20	3	5	58	social science	0	0	0	0	1	0.00367309	0.454545	0	4
2013	2	0.0425532	11	5	7	63	social science	1	1	0	1	1	0.00181077	0.93617	1	4
2013	1	0.0285714	11	3	4	43	social science	0	1	0	1	1	0.000816327	0.914286	1	1
2013	3	0.15	10	3	3	36	social science	1	0	0	0	1	0.0225	0.85	0	9
2013	0	0	10	1	3	31	social science	0	0	0	0	1	0	0.882353	0	0
2013	17	0.607143	8	6	5	44	social science	0	4	0	4	0	0.368622	0.392857	1	289
2013	9	0.391304	6	5	3	29	social science	0	1	0	1	1	0.153119	0.478261	1	81
2013	10	0.277778	7	5	6	43	social science	0	1	1	0	1	0.0771605	0.388889	0	100
2013	13	0.722222	9	5	5	31	social science	1	1	1	0	0	0.521605	0.277778	0	169
2013	12	0.857143	7	4	6	25	social science	1	0	0	0	0	0.734694	0.0714286	0	144
2013	3	0.214286	8	5	4	34	social science	1	1	1	0	1	0.0459184	0.785714	0	9
2013	17	0.944444	11	9	7	25	social science	1	0	0	0	0	0.891975	0.0555556	0	289
2013	15	0.833333	8	7	5	26	social science	1	1	1	0	0	0.694444	0.166667	0	225
2013	11	0.647059	9	6	4	20	social science	1	0	0	0	0	0.418685	0.235294	0	121
2013	13	0.317073	13	4	6	45	social science	1	0	0	0	1	0.100535	0.682927	0	169
2013	29	0.725	10	11	5	52	social science	1	2	1	1	0	0.525625	0.275	0	841
2013	5	0.25	14	2	5	39	social science	1	0	0	0	1	0.0625	0.7	0	25
2013	17	0.607143	9	10	0	31	social science	0	2	2	0	0	0.368622	0.392857	0	289
2013	30	0.612245	16	2	5	57	social science	1	11	2	9	0	0.374844	0.265306	1	900
2013	0	0	34	2	0	70	social science	1	0	0	0	1	0	0.528302	0	0
2013	13	0.302326	10	5	6	51	social science	0	0	0	0	1	0.0914008	0.651163	0	169
2013	1	0.111111	14	3	3	33	social science	0	0	0	0	1	0.0123457	0.444444	0	1
2013	0	0	27	4	3	46	social science	1	0	0	0	1	0	0.185185	0	0
2013	13	0.254902	18	4	8	69	social science	1	0	0	0	1	0.064975	0.705882	0	169
2013	0	0	15	3	5	66	social science	1	0	0	0	1	0	0.92	0	0
2013	0	0	3	1	0	7	social science	0	0	0	0	1	0	1	0	0
2013	0	0	9	3	2	29	social science	1	1	0	1	1	0	1	1	0
2013	1	0.0769231	36	1	3	81	social science	0	1	0	1	1	0.00591716	0.923077	1	1
2013	2	0.5	3	1	6	12	social science	0	1	1	0	0	0.25	0.5	0	4
2013	0	0	41	1	0	172	social science	1	0	0	0	1	0	1	0	0
2013	10	0.277778	19	4	0	58	social science	0	0	0	0	1	0.0771605	0.5	0	100
2013	2	0.111111	11	2	0	40	social science	0	0	0	0	1	0.0123457	0.833333	0	4
2013	0	0	21	3	0	78	social science	0	0	0	0	1	0	1	0	0
2013	0	0	12	3	5	22	social science	1	0	0	0	1	0	0.75	0	0
2013	9	0.126761	33	3	9	80	social science	1	0	0	0	1	0.0160682	0.816901	0	81
2013	0	0	9	5	6	98	social science	1	0	0	0	1	0	0.903614	0	0
2013	1	0.0192308	12	2	4	64	social science	0	3	1	2	1	0.000369823	0.0192308	1	1
2013	0	0	18	2	4	30	social science	0	0	0	0	1	0	0.25	0	0
2013	0	0	9	1	4	18	social science	0	0	0	0	1	0	1	0	0
2013	12	0.352941	7	12	5	42	social science	0	1	1	0	1	0.124567	0.0588235	0	144
2013	0	0	17	1	0	37	social science	0	0	0	0	1	0	1	0	0
2013	3	0.6	16	1	0	27	social science	0	0	0	0	0	0.36	0.2	0	9
2013	0	0	18	1	0	29	social science	0	2	0	2	1	0	1	1	0
2013	18	0.461538	24	3	0	70	social science	1	0	0	0	1	0.213018	0.410256	0	324
2013	0	0	23	3	0	12	social science	0	0	0	0	1	0	0	0	0
2013	0	0	15	2	0	36	social science	1	0	0	0	1	0	0.933333	0	0
2013	3	0.214286	14	1	5	36	social science	1	0	0	0	1	0.0459184	0.714286	0	9
2013	0	0	22	2	6	34	social science	1	1	1	0	1	0	0.4375	0	0
2013	15	0.428571	34	7	7	51	social science	1	1	1	0	1	0.183673	0.571429	0	225
2013	9	0.5	7	3	5	29	social science	1	0	0	0	0	0.25	0.5	0	81
2013	4	0.2	14	6	0	55	social science	1	1	0	1	1	0.04	0.3	1	16
2013	0	0	24	1	0	94	social science	0	0	0	0	1	0	0.777778	0	0
2013	0	0	4	1	0	8	social science	0	0	0	0	1	0	1	0	0
2013	0	0	14	1	5	87	social science	1	0	0	0	1	0	0.533333	0	0
2013	0	0	19	2	4	74	social science	1	0	0	0	1	0	1	0	0
2013	0	0	15	2	4	81	social science	0	3	0	3	1	0	0.901639	1	0
2013	0	0	11	2	4	22	social science	1	0	0	0	1	0	0.9	0	0
2013	4	0.125	10	3	4	48	social science	1	1	0	1	1	0.015625	0.59375	1	16
2013	27	0.72973	6	6	4	62	social science	1	2	2	0	0	0.532505	0.27027	0	729
2013	19	0.59375	17	15	7	51	social science	1	6	5	1	0	0.352539	0.40625	0	361
2013	1	0.0125	26	6	0	143	social science	1	3	0	3	1	0.00015625	0.65	1	1
2013	0	0	21	6	0	84	social science	1	2	0	2	1	0	0.611111	1	0
2013	2	0.0833333	19	1	2	47	social science	0	0	0	0	1	0.00694444	0.875	0	4
2013	2	0.111111	20	2	3	71	social science	0	0	0	0	1	0.0123457	0.833333	0	4
2013	0	0	12	4	5	32	social science	0	0	0	0	1	0	1	0	0
2013	3	0.0833333	18	4	6	39	social science	1	1	1	0	1	0.00694444	0.916667	0	9
2013	5	0.113636	16	3	5	91	social science	0	1	1	0	1	0.0129132	0.863636	0	25
2013	1	0.0526316	15	2	3	41	social science	0	0	0	0	1	0.00277008	0.947368	0	1
2013	3	0.125	16	4	5	35	social science	1	1	0	1	1	0.015625	0.625	1	9
2013	0	0	16	2	4	26	social science	0	0	0	0	1	0	1	0	0
2013	7	0.134615	15	3	4	56	social science	0	0	0	0	1	0.0181213	0.346154	0	49
2013	11	0.611111	13	2	4	39	social science	0	1	1	0	0	0.373457	0.388889	0	121
2013	6	1	11	5	4	17	social science	0	1	0	1	0	1	0	1	36
2013	0	0	15	1	5	44	social science	0	0	0	0	1	0	0	0	0
2013	17	0.85	11	5	5	29	social science	0	0	0	0	0	0.7225	0.15	0	289
2013	0	0	13	1	6	22	humanities	0	0	0	0	1	0		0	0
2013	0	0	14	3	3	41	social science	1	0	0	0	1	0	0.16	0	0
2013	18	0.5625	5	6	4	38	social science	1	3	2	1	0	0.316406	0.3125	0	324
2013	21	0.411765	5	3	5	56	social science	0	0	0	0	1	0.16955	0.568627	0	441
2013	22	0.536585	13	7	5	54	social science	1	0	0	0	0	0.287924	0.317073	0	484
2013	1	0.142857	5	2	5	22	social science	0	1	0	1	1	0.0204082	0.857143	1	1
2013	1	0.5	17	1	7	25	social science	0	0	0	0	0	0.25	0	0	1
2013	34	0.576271	9	6	6	66	social science	0	2	2	0	0	0.332088	0.40678	0	1156
2013	12	0.363636	9	3	5	38	social science	0	0	0	0	1	0.132231	0.606061	0	144
2013	6	0.166667	24	3	3	44	social science	1	1	0	1	1	0.0277778	0.833333	1	36
2013	4	0.181818	10	4	5	47	social science	0	0	0	0	1	0.0330579	0.5	0	16
2013	0	0	17	13	6	48	social science	1	1	1	0	1	0	0.65	0	0
2013	7	0.304348	7	4	0	38	social science	1	0	0	0	1	0.0926276	0.434783	0	49
2013	0	0	6	3	4	60	social science	1	1	0	1	1	0	0.818182	1	0
2013	18	0.782609	10	1	0	28	social science	1	0	0	0	0	0.612476	0.217391	0	324
2013	1	0.0212766	19	1	6	68	social science	0	0	0	0	1	0.000452693	0.93617	0	1
2013	2	0.0465116	12	3	0	53	social science	1	0	0	0	1	0.00216333	0.232558	0	4
2013	0	0	20	3	3	65	social science	0	1	0	1	1	0	1	1	0
2013	0	0	15	1	5	55	social science	0	0	0	0	1	0	0.969697	0	0
2013	0	0	18	2	5	74	social science	0	1	0	1	1	0	0.833333	1	0
2013	0	0	16	1	0	21	social science	0	0	0	0	1	0	0.928571	0	0
2013	0	0	17	3	0	25	social science	0	0	0	0	1	0	0.684211	0	0
2013	0	0	14	2	0	33	social science	0	2	0	2	1	0	0.954545	1	0
2013	0	0	13	1	0	25	social science	0	1	0	1	1	0	0.928571	1	0
2013	0	0	20	2	0	15	social science	0	0	0	0	1	0	0.75	0	0
2013	1	0.0526316	16	3	0	25	social science	1	0	0	0	1	0.00277008	0.947368	0	1
2013	0	0	14	3	5	35	social science	0	0	0	0	1	0	1	0	0
2013	0	0	18	3	3	47	social science	0	0	0	0	1	0	0.705882	0	0
2013	0	0	17	4	4	33	social science	0	0	0	0	1	0	0.9	0	0
2013	0	0	16	2	5	54	social science	1	2	0	2	1	0	0.866667	1	0
2013	0	0	12	2	4	28	social science	0	0	0	0	1	0	1	0	0
2013	0	0	15	1	5	37	social science	0	0	0	0	1	0	0.5	0	0
2013	1	0.0555556	27	3	5	38	humanities	1	0	0	0	1	0.00308642		0	1
2013	2	0.0645161	12	4	4	51	social science	1	0	0	0	1	0.00416233	0.806452	0	4
2013	7	0.28	8	3	6	32	social science	0	2	0	2	1	0.0784	0.64	1	49
2013	16	0.326531	13	6	4	53	social science	0	2	1	1	1	0.106622	0.591837	0	256
2013	6	0.206897	18	10	3	54	social science	1	3	1	2	1	0.0428062	0.793103	1	36
2013	3	0.107143	6	6	4	33	social science	1	0	0	0	1	0.0114796	0.285714	0	9
2013	1	0.0188679	10	2	6	71	social science	0	0	0	0	1	0.000355999	0.716981	0	1
2013	5	0.172414	25	3	9	50	social science	1	1	0	1	1	0.0297265	0.206897	1	25
2013	19	0.575758	26	2	6	42	social science	0	2	1	1	0	0.331497	0.242424	0	361
2013	2	0.153846	24	1	6	62	social science	0	0	0	0	1	0.0236686	0.846154	0	4
2013	0	0	20	2	4	27	social science	1	0	0	0	1	0	0.761905	0	0
2013	0	0	20	2	2	47	social science	1	0	0	0	1	0	1	0	0
2013	8	0.258065	18	2	5	40	social science	0	0	0	0	1	0.0665973	0.741935	0	64
2013	0	0	17	2	4	32	social science	0	1	0	1	1	0	0.925926	1	0
2013	1	0.0212766	19	9	4	73	social science	1	1	0	1	1	0.000452693	0.957447	1	1
2013	23	0.958333	12	1	6	42	social science	0	0	0	0	0	0.918403	0	0	529
2013	11	0.423077	9	2	10	36	social science	1	3	1	2	1	0.178994	0.384615	1	121
2013	8	0.32	9	5	0	27	social science	1	0	0	0	1	0.1024	0.56	0	64
2013	9	0.75	13	6	0	20	social science	1	0	0	0	0	0.5625	0.25	0	81
2013	16	0.5	13	11	0	39	social science	1	0	0	0	0	0.25	0.5	0	256
2013	1	0.047619	10	1	7	40	social science	0	0	0	0	1	0.00226757	0.190476	0	1
2013	11	0.5	9	4	9	24	social science	1	0	0	0	0	0.25	0.5	0	121
2013	0	0	30	3	5	67	social science	1	0	0	0	1	0	0.795918	0	0
2013	7	0.0945946	15	4	0	97	social science	1	0	0	0	1	0.00894814	0.824324	0	49
2013	0	0	22	3	3	24	social science	1	0	0	0	1	0	1	0	0
2013	29	0.763158	7	5	5	40	social science	1	2	2	0	0	0.58241	0.184211	0	841
2013	0	0	13	2	3	73	social science	0	0	0	0	1	0	0.711538	0	0
2013	12	0.27907	14	2	7	55	social science	1	0	0	0	1	0.0778799	0.72093	0	144
2013	6	0.142857	10	5	6	54	social science	1	5	0	5	1	0.0204082	0.666667	1	36
2013	15	0.535714	12	2	4	31	social science	0	0	0	0	0	0.28699	0.464286	0	225
2013	0	0	27	3	4	26	social science	0	0	0	0	1	0	0.181818	0	0
2013	0	0	25	3	3	32	social science	1	2	0	2	1	0	0.633333	1	0
2013	41	0.650794	14	6	3	77	social science	1	5	4	1	0	0.423532	0.269841	0	1681
2013	3	0.1	7	5	3	36	social science	1	3	0	3	1	0.01	0.866667	1	9
2013	0	0	19	1	13	7	social science	1	3	1	2	1	0	1	1	0
2013	0	0	35	2	0	38	social science	1	2	0	2	1	0	0.432432	1	0
2013	0	0	24	2	0	25	social science	0	0	0	0	1	0	0.923077	0	0
2013	3	0.0882353	16	2	3	50	social science	0	0	0	0	1	0.00778547	0.176471	0	9
2013	16	0.727273	7	9	6	38	social science	0	1	1	0	0	0.528926	0.136364	0	256
2013	12	0.857143	5	11	3	16	social science	1	1	1	0	0	0.734694	0.142857	0	144
2013	25	0.961538	5	8	3	35	social science	1	0	0	0	0	0.924556	0	0	625
2013	1	0.333333	3	1	0	8	social science	0	0	0	0	1	0.111111	0.666667	0	1
2013	1	0.1	52	2	5	19	social science	1	0	0	0	1	0.01	0.9	0	1
2013	5	0.3125	11	4	5	27	social science	1	0	0	0	1	0.0976562	0.6875	0	25
2013	13	0.433333	10	4	7	40	social science	0	0	0	0	1	0.187778	0.566667	0	169
2013	13	0.265306	13	4	6	64	social science	1	2	0	2	1	0.0703873	0.693878	1	169
2013	3	0.142857	22	3	5	38	humanities	1	0	0	0	1	0.0204082		0	9
2013	11	0.478261	8	7	5	24	social science	1	3	2	1	1	0.228733	0.478261	0	121
2013	7	0.318182	7	4	4	33	social science	0	1	0	1	1	0.10124	0.636364	1	49
2013	14	0.4375	12	4	6	40	social science	0	1	0	1	1	0.191406	0.53125	1	196
2013	0	0	6	4	0	31	social science	1	0	0	0	1	0	0.888889	0	0
2013	0	0	15	3	2	56	social science	1	2	0	2	1	0	0.891892	1	0
2013	4	0.0816327	21	4	4	71	social science	1	0	0	0	1	0.00666389	0.77551	0	16
2013	0	0	13	3	4	34	social science	1	3	0	3	1	0	0.966667	1	0
2013	2	0.0555556	12	3	5	39	social science	1	1	0	1	1	0.00308642	0.555556	1	4
2013	0	0	20	1	6	40	humanities	0	0	0	0	1	0		0	0
2013	0	0	14	1	6	24	humanities	0	0	0	0	1	0		0	0
2013	5	0.192308	29	1	5	30	social science	0	1	0	1	1	0.0369822	0.769231	1	25
2013	7	0.25	12	4	3	59	social science	1	1	0	1	1	0.0625	0.571429	1	49
2013	8	0.275862	11	5	1	42	social science	1	0	0	0	1	0.0760999	0.241379	0	64
2013	26	0.619048	15	1	5	47	social science	0	0	0	0	0	0.38322	0.380952	0	676
2013	3	0.214286	15	9	7	22	social science	0	2	0	2	1	0.0459184	0.785714	1	9
2013	8	0.615385	7	1	3	14	social science	0	1	1	0	0	0.378698	0.230769	0	64
2013	11	0.458333	15	2	6	30	social science	1	0	0	0	1	0.210069	0.208333	0	121
2013	7	0.388889	11	4	2	22	social science	0	1	0	1	1	0.151235	0.611111	1	49
2013	17	0.708333	10	6	6	27	social science	0	1	0	1	0	0.501736	0.291667	1	289
2013	0	0	14	2	6	52	social science	1	4	0	4	1	0	0.764706	1	0
2013	2	0.0689655	27	3	5	59	social science	1	2	0	2	1	0.00475624	0.758621	1	4
2013	0	0	10	4	4	59	social science	1	1	0	1	1	0	0.813953	1	0
2013	0	0	4	2	6	7	social science	0	0	0	0	1	0	1	0	0
2013	0	0	19	5	4	61	social science	1	0	0	0	1	0	0.681818	0	0
2013	0	0	20	2	5	60	social science	0	1	0	1	1	0	0.333333	1	0
2013	5	0.217391	19	4	5	57	social science	1	1	0	1	1	0.047259	0.652174	1	25
2013	0	0	21	3	5	31	social science	1	1	0	1	1	0	1	1	0
2013	4	0.333333	23	2	4	27	social science	0	0	0	0	1	0.111111	0.666667	0	16
2013	3	0.157895	15	3	6	52	social science	1	0	0	0	1	0.0249307	0.789474	0	9
2013	1	0.142857	19	1	4	21	social science	0	0	0	0	1	0.0204082	0.285714	0	1
2013	35	0.833333	12	10	5	82	social science	0	1	1	0	0	0.694444	0.142857	0	1225
2013	17	0.809524	8	2	6	31	social science	1	4	3	1	0	0.655329	0.190476	0	289
2013	0	0	19	2	3	51	social science	0	0	0	0	1	0	0.378378	0	0
2013	0	0	14	3	7	48	social science	1	0	0	0	1	0	0.75	0	0
2013	0	0	13	2	6	38	social science	0	0	0	0	1	0	0.8	0	0
2013	0	0	14	5	3	38	social science	1	3	1	2	1	0	0.733333	1	0
2013	0	0	15	3	4	47	social science	1	0	0	0	1	0	0.290323	0	0
2013	1	0.0625	15	3	5	36	social science	1	1	0	1	1	0.00390625	0.8125	1	1
2013	0	0	16	3	5	60	social science	1	0	0	0	1	0	0.469388	0	0
2013	3	0.09375	14	3	7	38	social science	0	0	0	0	1	0.00878906	0.46875	0	9
2013	0	0	16	4	6	46	social science	0	0	0	0	1	0	0.473684	0	0
2013	24	0.648649	6	9	4	38	social science	0	4	4	0	0	0.420745	0.351351	0	576
2013	0	0	19	1	7	38	social science	0	0	0	0	1	0	0.92	0	0
2013	1	0.0222222	14	1	0	66	social science	0	0	0	0	1	0.000493827	0.311111	0	1
2013	12	0.461538	12	2	6	29	social science	0	0	0	0	1	0.213018	0.538462	0	144
2013	19	0.452381	16	5	6	51	social science	1	0	0	0	1	0.204649	0.428571	0	361
2013	3	1	10	1	3	14	social science	0	0	0	0	0	1	0	0	9
2013	2	0.0571429	23	2	4	49	social science	1	0	0	0	1	0.00326531	0.685714	0	4
2013	2	0.0294118	27	2	5	101	social science	1	0	0	0	1	0.000865052	0.897059	0	4
2013	7	0.7	7	4	4	15	social science	1	1	1	0	0	0.49	0	0	49
2013	15	0.714286	15	2	6	31	social science	0	1	1	0	0	0.510204	0.142857	0	225
2013	3	0.125	14	3	6	30	social science	1	0	0	0	1	0.015625	0.208333	0	9
2013	5	0.416667	17	2	5	33	social science	0	0	0	0	1	0.173611	0	0	25
2013	36	0.553846	24	1	3	99	social science	0	4	1	3	0	0.306746	0.2	1	1296
2013	8	0.421053	15	1	4	30	social science	0	2	0	2	1	0.177285	0.210526	1	64
2013	1	0.0588235	16	2	7	21	social science	0	0	0	0	1	0.00346021	0.529412	0	1
2013	12	0.193548	27	4	5	95	social science	0	1	0	1	1	0.037461	0.774194	1	144
2013	2	0.0689655	13	1	7	37	social science	0	2	0	2	1	0.00475624	0.655172	1	4
2013	0	0	16	3	5	37	social science	1	0	0	0	1	0	0.833333	0	0
2013	3	0.2	22	1	5	24	social science	0	0	0	0	1	0.04	0.6	0	9
2013	2	0.0588235	20	2	6	76	social science	1	0	0	0	1	0.00346021	0.470588	0	4
2013	6	0.0952381	21	3	4	99	social science	0	0	0	0	1	0.0090703	0.619048	0	36
2013	5	0.185185	8	2	3	36	social science	0	2	0	2	1	0.0342936	0.111111	1	25
2013	6	0.09375	20	1	10	86	social science	0	0	0	0	1	0.00878906	0.53125	0	36
2013	2	0.0869565	9	2	4	25	social science	0	0	0	0	1	0.00756144	0.913044	0	4
2013	18	0.529412	10	4	5	48	social science	1	5	3	2	0	0.280277	0.411765	0	324
2013	14	0.318182	12	6	6	61	social science	1	3	1	2	1	0.10124	0.590909	1	196
2013	3	0.0882353	9	3	5	58	social science	0	1	1	0	1	0.00778547	0.147059	0	9
2013	1	0.05	13	4	8	42	social science	1	0	0	0	1	0.0025	0.5	0	1
2013	5	0.208333	25	2	0	32	social science	1	1	0	1	1	0.0434028	0.0416667	1	25
2013	0	0	18	4	4	50	social science	1	5	0	5	1	0	0.414634	1	0
2013	1	0.0285714	24	2	5	57	social science	1	1	0	1	1	0.000816327	0.885714	1	1
2013	1	0.111111	19	1	6	25	social science	0	0	0	0	1	0.0123457	0.888889	0	1
2013	2	0.0540541	14	4	4	46	social science	1	2	0	2	1	0.00292184	0.648649	1	4
2013	20	0.666667	20	3	6	44	social science	1	1	0	1	0	0.444444	0.333333	1	400
2013	3	0.2	12	1	4	30	social science	0	9	6	3	1	0.04	0.8	0	9
2013	12	0.363636	10	4	4	44	social science	0	0	0	0	1	0.132231	0.545455	0	144
2013	21	0.552632	13	3	5	48	social science	0	12	9	3	0	0.305402	0.184211	0	441
2013	0	0	14	2	6	16	social science	0	1	1	0	1	0	1	0	0
2013	1	0.142857	8	1	5	14	social science	0	0	0	0	1	0.0204082	0.857143	0	1
2013	0	0	14	1	4	21	social science	0	2	0	2	1	0	1	1	0
2013	0	0	12	1	6	37	social science	0	0	0	0	1	0	0	0	0
2013	11	0.423077	18	2	0	45	social science	1	0	0	0	1	0.178994	0.384615	0	121
2013	2	0.0555556	18	3	0	45	social science	0	1	0	1	1	0.00308642	0.0555556	1	4
2013	0	0	8	2	5	51	social science	1	1	1	0	1	0	0.727273	0	0
2013	0	0	7	5	3	63	social science	0	0	0	0	1	0	0.972222	0	0
2013	6	0.15	8	4	5	54	social science	1	0	0	0	1	0.0225	0.65	0	36
2013	0	0	3	3	4	14	social science	1	3	1	2	1	0	1	1	0
2013	10	0.212766	8	3	4	72	social science	1	0	0	0	1	0.0452694	0.638298	0	100
2013	1	0.0238095	7	3	6	49	social science	1	1	0	1	1	0.000566893	0.952381	1	1
2013	10	0.27027	13	3	5	42	social science	0	0	0	0	1	0.073046	0.72973	0	100
2013	0	0	7	4	6	28	social science	0	2	1	1	1	0	0.736842	0	0
2013	3	0.0967742	16	2	10	51	social science	1	1	0	1	1	0.00936524	0.903226	1	9
2013	2	0.08	7	1	5	35	social science	0	1	0	1	1	0.0064	0.88	1	4
2013	0	0	19	2	4	47	social science	1	1	0	1	1	0	0.863636	1	0
2013	3	0.0638298	14	3	5	66	social science	1	3	0	3	1	0.00407424	0.914894	1	9
2013	0	0	28	4	0	27	social science	1	3	0	3	1	0	0.5	1	0
2013	6	0.214286	28	2	0	51	social science	0	1	1	0	1	0.0459184	0.142857	0	36
2013	2	0.0555556	15	4	7	63	social science	0	0	0	0	1	0.00308642	0.944444	0	4
2013	28	0.965517	14	6	0	38	social science	1	0	0	0	0	0.932223	0	0	784
2013	6	0.0857143	13	3	6	103	social science	1	0	0	0	1	0.00734694	0.842857	0	36
2013	4	0.114286	9	1	3	43	social science	0	0	0	0	1	0.0130612	0.657143	0	16
2013	1	0.0131579	14	2	6	110	social science	0	0	0	0	1	0.00017313	0.947368	0	1
2013	2	0.0869565	7	4	5	31	social science	1	1	0	1	1	0.00756144	0.913044	1	4
2013	8	0.533333	15	4	5	24	social science	0	0	0	0	0	0.284444	0.2	0	64
2013	1	0.0344828	10	3	5	47	social science	1	0	0	0	1	0.00118906	0.896552	0	1
2013	0	0	19	4	5	36	social science	0	2	1	1	1	0	0.6875	0	0
2013	0	0	20	3	3	29	social science	0	1	0	1	1	0	1	1	0
2013	2	0.0465116	18	3	5	102	social science	1	0	0	0	1	0.00216333	0.906977	0	4
2013	0	0	10	2	5	29	social science	0	0	0	0	1	0	0.9375	0	0
2013	2	0.0625	14	2	0	52	social science	0	1	0	1	1	0.00390625	0.75	1	4
2013	1	0.0322581	14	5	6	53	social science	1	7	4	3	1	0.00104058	0.967742	0	1
2013	9	0.209302	11	3	8	57	social science	1	0	0	0	1	0.0438075	0.744186	0	81
2013	3	0.125	10	7	0	30	social science	0	1	1	0	1	0.015625	0.583333	0	9
2013	16	0.372093	9	7	5	60	social science	1	0	0	0	1	0.138453	0.27907	0	256
2013	2	0.117647	8	1	3	21	social science	0	5	1	4	1	0.0138408	0.764706	1	4
2013	0	0	10	3	4	19	social science	0	0	0	0	1	0	0.846154	0	0
2013	2	0.0434783	40	1	0	64	social science	0	2	0	2	1	0.00189036	0.130435	1	4
2013	12	0.285714	10	5	8	60	social science	1	2	0	2	1	0.0816327	0.714286	1	144
2013	3	0.166667	9	14	5	49	social science	1	0	0	0	1	0.0277778	0.833333	0	9
2013	26	0.619048	11	2	6	68	social science	0	2	2	0	0	0.38322	0.357143	0	676
2013	17	0.73913	5	4	5	25	social science	0	0	0	0	0	0.546314	0.173913	0	289
2013	13	0.866667	5	7	3	16	social science	1	2	2	0	0	0.751111	0.133333	0	169
2013	4	0.142857	5	7	4	33	social science	1	1	0	1	1	0.0204082	0	1	16
2013	26	0.866667	8	10	3	38	social science	0	5	5	0	0	0.751111	0.133333	0	676
2013	17	0.944444	8	24	7	21	social science	1	0	0	0	0	0.891975	0.0555556	0	289
2013	0	0	18	1	7	27	social science	0	0	0	0	1	0	0.666667	0	0
2013	9	1	2	2	0	10	social science	1	0	0	0	0	1	0	0	81
2013	26	1	7	6	5	27	social science	0	0	0	0	0	1	0	0	676
2013	16	0.888889	7	1	6	23	social science	0	0	0	0	0	0.790123	0.111111	0	256
2013	16	1	8	4	5	21	social science	0	1	1	0	0	1	0	0	256
2013	11	1	6	4	7	16	social science	0	0	0	0	0	1	0	0	121
2013	13	1	7	3	5	25	social science	0	0	0	0	0	1	0	0	169
2013	19	1	6	6	5	25	social science	0	0	0	0	0	1	0	0	361
2013	17	0.944444	8	7	5	28	social science	0	2	2	0	0	0.891975	0.0555556	0	289
2013	16	0.8	7	10	7	22	social science	0	1	1	0	0	0.64	0.2	0	256
2013	21	0.913044	8	2	5	29	social science	0	0	0	0	0	0.833648	0.0869565	0	441
2013	10	0.714286	8	8	6	17	social science	0	1	1	0	0	0.510204	0.285714	0	100
2013	16	1	8	7	6	18	social science	0	2	2	0	0	1	0	0	256
2013	0	0	22	1	6	51	humanities	0	0	0	0	1	0	0	0	0
2013	1	0.333333	11	5	8	8	social science	0	0	0	0	1	0.111111	0.666667	0	1
2013	3	0.157895	18	6	3	48	social science	1	0	0	0	1	0.0249307	0.789474	0	9
2013	0	0	15	3	5	13	social science	0	0	0	0	1	0	0.555556	0	0
2013	0	0	8	4	4	15	social science	0	1	0	1	1	0	0.615385	1	0
2013	6	0.375	14	3	6	54	social science	0	0	0	0	1	0.140625	0.5	0	36
2013	4	0.8	5	4	0	6	social science	1	0	0	0	0	0.64	0.2	0	16
2013	2	0.0689655	18	3	5	49	social science	1	1	0	1	1	0.00475624	0.793103	1	4
2013	0	0	14	2	5	21	social science	0	0	0	0	1	0	0.75	0	0
2013	0	0	24	3	5	32	social science	1	0	0	0	1	0	0.833333	0	0
2013	0	0	3	3	0	8	social science	1	1	0	1	1	0	0.857143	1	0
2013	7	0.148936	16	4	4	52	social science	1	0	0	0	1	0.022182	0.829787	0	49
2013	0	0	17	3	2	33	social science	1	0	0	0	1	0	1	0	0
2013	4	0.333333	14	2	4	52	social science	0	0	0	0	1	0.111111	0.5	0	16
2013	10	0.5	23	3	0	42	social science	1	0	0	0	0	0.25	0	0	100
2013	5	0.333333	10	2	5	23	social science	0	0	0	0	1	0.111111	0.266667	0	25
2013	1	0.0769231	7	2	3	51	humanities	1	0	0	0	1	0.00591716		0	1
2013	2	0.117647	7	3	4	36	social science	0	2	0	2	1	0.0138408	0.352941	1	4
2013	0	0	9	2	5	69	social science	0	0	0	0	1	0	1	0	0
2013	5	0.357143	26	3	6	60	social science	1	1	0	1	1	0.127551	0.357143	1	25
2013	1	0.142857	11	1	3	27	social science	0	0	0	0	1	0.0204082	0.428571	0	1
2013	1	0.2	13	2	4	34	social science	0	0	0	0	1	0.04	0.8	0	1
2013	1	0.0285714	7	2	3	43	social science	0	1	0	1	1	0.000816327	0.542857	1	1
2013	4	0.285714	27	2	5	48	social science	0	0	0	0	1	0.0816327	0.714286	0	16
2013	0	0	23	1	6	36	social science	1	0	0	0	1	0	1	0	0
2013	0	0	26	1	7	49	social science	0	0	0	0	1	0	0.5	0	0
2013	0	0	23	1	5	54	social science	0	0	0	0	1	0	1	0	0
2013	0	0	19	3	4	31	social science	1	0	0	0	1	0	1	0	0
2013	10	0.25641	9	3	0	51	social science	0	0	0	0	1	0.0657462	0.641026	0	100
2013	21	0.617647	7	3	6	46	social science	0	1	1	0	0	0.381488	0.0882353	0	441
2013	0	0	10	3	4	9	social science	0	0	0	0	1	0	1	0	0
2013	18	0.4	8	3	6	54	social science	0	1	0	1	1	0.16	0.466667	1	324
2013	3	0.230769	5	2	8	16	social science	0	0	0	0	1	0.0532544	0.0769231	0	9
2013	0	0	5	4	4	29	social science	0	0	0	0	1	0	0.857143	0	0
2013	1	0.0625	6	2	5	22	social science	0	5	0	5	1	0.00390625	0.625	1	1
2013	1	0.05	7	4	6	39	social science	0	0	0	0	1	0.0025	0.85	0	1
2013	0	0	7	3	5	37	social science	0	1	0	1	1	0	1	1	0
2013	11	0.733333	6	3	6	15	social science	0	0	0	0	0	0.537778	0.266667	0	121
2013	0	0	9	1	7	40	social science	0	0	0	0	1	0	1	0	0
2013	0	0	5	2	5	36	social science	0	0	0	0	1	0	0.954545	0	0
2013	1	0.0344828	7	5	3	46	social science	0	0	0	0	1	0.00118906	0.793103	0	1
2013	0	0	8	5	5	16	social science	1	0	0	0	1	0	0.777778	0	0
2013	6	0.24	9	3	5	27	social science	1	2	1	1	1	0.0576	0.36	0	36
2013	0	0	7	3	5	34	social science	1	0	0	0	1	0	0.344828	0	0
2013	3	0.2	7	1	3	22	social science	0	0	0	0	1	0.04	0.6	0	9
2013	18	0.72	10	4	5	29	social science	0	2	2	0	0	0.5184	0.28	0	324
2013	4	0.137931	8	3	5	40	social science	0	0	0	0	1	0.019025	0.62069	0	16
2013	1	0.0344828	7	4	5	35	social science	0	1	1	0	1	0.00118906	0.62069	0	1
2013	4	0.111111	10	2	5	41	social science	0	1	0	1	1	0.0123457	0.666667	1	16
2013	32	0.571429	15	5	7	65	social science	0	0	0	0	0	0.326531	0.178571	0	1024
2013	2	0.0555556	6	5	6	55	social science	1	0	0	0	1	0.00308642	0.666667	0	4
2013	0	0	6	2	4	28	social science	0	1	0	1	1	0	0.95	1	0
2013	0	0	11	1	4	19	social science	0	2	1	1	1	0	0.941176	0	0
2013	2	0.0571429	8	2	6	64	social science	0	0	0	0	1	0.00326531	0.942857	0	4
2013	0	0	13	2	4	60	social science	1	1	0	1	1	0	1	1	0
2013	2	0.0689655	14	1	7	49	social science	0	1	0	1	1	0.00475624	0.931035	1	4
2013	0	0	7	2	6	27	social science	0	0	0	0	1	0	0.866667	0	0
2013	3	0.176471	17	2	0	28	social science	0	2	2	0	1	0.0311419	0.647059	0	9
2013	1	0.1	29	5	4	23	social science	1	0	0	0	1	0.01	0.7	0	1
2013	11	0.647059	7	5	4	30	social science	0	1	1	0	0	0.418685	0.294118	0	121
2013	1	0.5	2	5	0	2	social science	0	0	0	0	0	0.25	0	0	1
2013	7	0.7	12	3	4	13	social science	1	0	0	0	0	0.49	0.3	0	49
2013	30	0.405405	18	3	3	89	social science	0	0	0	0	1	0.164354	0.472973	0	900
2013	20	0.4	10	2	5	67	social science	0	1	0	1	1	0.16	0.54	1	400
2013	1	0.5	4	3	1	3	social science	1	0	0	0	0	0.25	0.5	0	1
2013	1	0.2	5	1	5	9	social science	0	0	0	0	1	0.04	0.8	0	1
2013	0	0	19	2	5	47	social science	1	1	0	1	1	0	1	1	0
2013	0	0	9	5	0	36	social science	1	0	0	0	1	0	0.954545	0	0
2013	0	0	11	5	0	48	social science	1	0	0	0	1	0	0.892857	0	0
2013	1	0.04	12	4	0	62	social science	1	1	0	1	1	0.0016	0.8	1	1
2013	10	0.192308	7	3	0	61	social science	0	0	0	0	1	0.0369822	0.769231	0	100
2013	0	0	10	1	3	16	social science	0	0	0	0	1	0	0.933333	0	0
2013	1	0.0263158	13	3	4	66	social science	1	0	0	0	1	0.000692521	0.789474	0	1
2013	1	0.0526316	15	3	0	31	social science	1	0	0	0	1	0.00277008	0.473684	0	1
2013	0	0	14	6	5	35	social science	0	0	0	0	1	0	0.863636	0	0
2013	0	0	31	2	5	65	humanities	0	0	0	0	1	0		0	0
2013	0	0	21	2	5	28	social science	0	0	0	0	1	0	1	0	0
2013	2	0.0307692	38	5	0	94	social science	1	2	0	2	1	0.000946746	0.938462	1	4
2013	26	0.866667	7	4	4	41	social science	0	3	2	1	0	0.751111	0.133333	0	676
2013	10	0.588235	9	5	5	25	social science	0	0	0	0	0	0.346021	0.411765	0	100
2013	1	1	8	2	6	24	social science	1	1	0	1	0	1	0	1	1
2013	32	0.761905	9	5	5	46	social science	0	5	1	4	0	0.580499	0.166667	1	1024
2013	4	0.181818	7	8	4	31	social science	1	0	0	0	1	0.0330579	0.818182	0	16
2013	1	0.0344828	28	3	5	51	social science	1	1	0	1	1	0.00118906	0.517241	1	1
2013	0	0	30	1	6	43	social science	0	0	0	0	1	0	0.666667	0	0
2013	15	0.75	11	6	5	37	social science	0	0	0	0	0	0.5625	0.25	0	225
2013	133	0.665	22	2	3	229	social science	1	7	5	2	0	0.442225	0.335	0	17689
2013	4	0.148148	12	3	5	27	social science	0	0	0	0	1	0.0219479	0.851852	0	16
2013	8	0.195122	12	3	8	54	social science	1	1	0	1	1	0.0380726	0.804878	1	64
2013	2	0.05	16	1	6	50	social science	0	0	0	0	1	0.0025	0.925	0	4
2013	0	0	22	4	5	64	social science	1	0	0	0	1	0	0.852941	0	0
2013	5	0.147059	16	3	5	52	social science	0	0	0	0	1	0.0216263	0.764706	0	25
2013	18	0.782609	9	6	6	27	social science	0	0	0	0	0	0.612476	0.217391	0	324
2013	2	0.0769231	7	5	5	36	social science	1	4	0	4	1	0.00591716	0.769231	1	4
2013	0	0	16	3	7	64	social science	1	0	0	0	1	0	0.842105	0	0
2013	0	0	18	2	4	24	humanities	1	0	0	0	1	0		0	0
2013	0	0	35	2	3	61	humanities	1	0	0	0	1	0		0	0
2013	0	0	20	3	12	145	social science	1	1	0	1	1	0	0.757576	1	0
2013	2	1	2	2	0	3	social science	0	1	1	0	0	1	0	0	4
2013	0	0	18	4	0	28	social science	0	0	0	0	1	0	0.722222	0	0
2013	1	0.0555556	12	1	0	29	social science	0	0	0	0	1	0.00308642	0.611111	0	1
2013	1	0.0666667	16	4	4	57	social science	1	0	0	0	1	0.00444444	0.733333	0	1
2013	4	0.16	8	3	5	35	social science	0	1	1	0	1	0.0256	0.72	0	16
2013	1	0.0344828	19	4	7	54	social science	1	1	0	1	1	0.00118906	0.241379	1	1
2013	4	0.25	6	3	0	26	social science	0	0	0	0	1	0.0625	0.5625	0	16
2013	2	0.25	18	1	5	41	social science	0	0	0	0	1	0.0625	0.375	0	4
2013	0	0	13	1	4	30	social science	0	0	0	0	1	0	0.266667	0	0
2013	6	0.857143	22	3	4	17	social science	1	0	0	0	0	0.734694	0	0	36
2013	9	0.219512	16	5	5	70	social science	0	2	1	1	1	0.0481856	0.414634	0	81
2013	17	0.515151	14	3	5	44	social science	1	0	0	0	0	0.265381	0.30303	0	289
2013	2	0.133333	11	2	2	19	social science	1	0	0	0	1	0.0177778	0.866667	0	4
2013	0	0	14	3	6	42	social science	1	0	0	0	1	0	1	0	0
2013	0	0	17	3	5	35	social science	1	1	0	1	1	0	0.956522	1	0
2013	13	0.309524	19	4	6	66	social science	1	2	1	1	1	0.095805	0.309524	0	169
2013	0	0	16	2	0	48	social science	1	0	0	0	1	0	0.75	0	0
2013	2	0.133333	14	3	5	26	social science	0	0	0	0	1	0.0177778	0.8	0	4
2013	7	0.225806	25	1	5	35	social science	0	1	0	1	1	0.0509886	0.774194	1	49
2013	1	0.0169492	24	1	0	104	social science	0	2	0	2	1	0.000287274	0.559322	1	1
2013	2	0.0714286	12	7	6	50	social science	1	1	0	1	1	0.00510204	0.857143	1	4
2013	2	0.0363636	13	4	6	67	social science	1	1	0	1	1	0.00132231	0.890909	1	4
2013	0	0	18	2	4	39	humanities	0	1	0	1	1	0		1	0
2013	2	0.117647	16	1	8	78	social science	1	2	0	2	1	0.0138408	0.117647	1	4
2013	3	0.1875	16	3	8	91	social science	1	2	0	2	1	0.0351562	0.0625	1	9
2013	21	0.7	8	5	5	42	social science	1	0	0	0	0	0.49	0.266667	0	441
2013	10	0.769231	9	5	3	20	social science	0	0	0	0	0	0.591716	0.153846	0	100
2013	6	0.125	20	2	4	56	social science	0	0	0	0	1	0.015625	0.583333	0	36
2013	13	0.232143	22	3	7	76	social science	1	4	0	4	1	0.0538903	0.767857	1	169
2013	0	0	23	4	4	104	social science	1	2	0	2	1	0	0.623188	1	0
2013	0	0	5	3	0	16	social science	1	0	0	0	1	0	0.5	0	0
2013	45	0.818182	9	3	6	57	social science	0	2	2	0	0	0.669421	0.181818	0	2025
2013	36	0.857143	6	6	5	44	social science	1	0	0	0	0	0.734694	0.0714286	0	1296
2013	0	0	21	1	0	59	social science	0	0	0	0	1	0	0.388889	0	0
2013	0	0	9	2	5	7	social science	1	0	0	0	1	0	0.8	0	0
2013	0	0	9	3	5	6	social science	1	0	0	0	1	0	1	0	0
2013	0	0	8	1	4	22	social science	0	0	0	0	1	0	0.538462	0	0
2013	0	0	22	3	8	22	social science	0	0	0	0	1	0	0.8	0	0
2013	4	0.307692	20	3	7	37	social science	1	1	1	0	1	0.0946746	0.230769	0	16
2013	1	0.0555556	22	3	9	27	social science	1	2	0	2	1	0.00308642	0.333333	1	1
2013	8	0.421053	20	2	9	38	social science	0	1	1	0	1	0.177285	0.526316	0	64
2013	69	0.663462	30	2	5	120	social science	0	1	0	1	0	0.440181	0.326923	1	4761
2013	21	0.355932	16	3	0	73	social science	1	2	1	1	1	0.126688	0.322034	0	441
2013	4	0.444444	13	1	5	31	humanities	0	1	0	1	1	0.197531		1	16
2013	5	0.277778	13	1	8	63	humanities	1	2	0	2	1	0.0771605		1	25
2013	1	0.0666667	26	2	6	22	social science	0	0	0	0	1	0.00444444	0.0666667	0	1
2013	4	0.333333	26	3	6	29	social science	1	0	0	0	1	0.111111	0.333333	0	16
2013	4	0.097561	22	5	5	70	social science	1	0	0	0	1	0.00951814	0.0487805	0	16
2013	7	0.35	6	4	6	32	social science	1	2	0	2	1	0.1225	0.5	1	49
2013	7	0.189189	8	5	7	50	social science	1	0	0	0	1	0.0357926	0.783784	0	49
2013	2	0.0540541	19	1	5	62	social science	0	0	0	0	1	0.00292184	0.486486	0	4
2013	2	0.0740741	8	3	0	48	social science	1	0	0	0	1	0.00548697	0.333333	0	4
2013	0	0	17	2	6	20	social science	1	0	0	0	1	0	0.941176	0	0
2013	5	0.142857	11	2	3	41	social science	1	0	0	0	1	0.0204082	0.8	0	25
2013	10	0.322581	17	1	5	51	social science	0	0	0	0	1	0.104058	0.645161	0	100
2013	0	0	10	4	5	63	social science	1	0	0	0	1	0	0.972973	0	0
2013	5	0.5	8	2	0	16	social science	0	2	1	1	0	0.25	0.5	0	25
2013	0	0	4	1	0	9	social science	0	0	0	0	1	0	0.666667	0	0
2013	11	0.354839	19	3	5	53	social science	1	2	1	1	1	0.125911	0.612903	0	121
2013	0	0	29	2	0	89	social science	1	0	0	0	1	0	0.6	0	0
2013	0	0	6	2	6	6	social science	1	0	0	0	1	0	0.25	0	0
2013	1	0.0833333	7	4	6	13	social science	1	1	1	0	1	0.00694444	0.166667	0	1
2013	1	0.0909091	5	4	6	15	social science	0	1	0	1	1	0.00826446	0.909091	1	1
[truncated: 29,336 more rows]
