# Supplementary material for: Double-edged sword of interdisciplinary knowledge flow from hard sciences to humanities and social sciences: Evidence from China
Source: PLoS One. 2017 Sep 21;12(9):e0184977. doi: 10.1371/journal.pone.0184977 (PMC5608305; doi:10.1371/journal.pone.0184977)
Supplement: S2 Data — (XLSX) [file pone.0184977.s005.xlsx]

## Sheet: S2_Data
year	stamn	stamp	page	author	keyword	reference	discipline	international	win10all	win10hs	win10hss	attribute	stamp2	selfciting	cattribute	stamn2
2004	36	0.782609	11	4	5	52	social science	0	22	16	6	0	0.612476	0.195652	0	1296
2004	1	0.0526316	14	4	0	38	social science	0	0	0	0	1	0.00277008	0.789474	0	1
2004	7	0.388889	19	8	0	45	social science	1	124	55	69	1	0.151235	0.555556	1	49
2004	15	0.625	14	8	0	40	social science	1	15	10	5	0	0.390625	0.291667	0	225
2004	0	0	19	2	0	12	social science	1	73	6	67	1	0	0.875	1	0
2004	0	0	36	1	0	163	humanities	0	3	1	2	1	0	0.875	1	0
2004	0	0	12	4	0	17	social science	0	2	1	1	1	0	1	0	0
2004	0	0	13	2	0	17	social science	0	7	2	5	1	0	1	1	0
2004	1	0.333333	10	3	5	10	social science	1	5	1	4	1	0.111111	0.666667	1	1
2004	0	0	16	2	4	38	social science	0	0	0	2	1	0	0.5	1	0
2004	5	0.227273	5	3	4	32	social science	0	6	2	4	1	0.0516529	0.454545	1	25
2004	0	0	22	4	0	35	social science	1	16	6	10	1	0	1	1	0
2004	0	0	16	1	6	34	social science	0	0	0	1	1	0	1	1	0
2004	1	0.5	20	2	0	65	social science	1	5	1	4	0	0.25	0	1	1
2004	0	0	23	3	0	36	social science	1	0	0	0	1	0	0.181818	0	0
2004	0	0	39	3	5	42	social science	1	20	3	17	1	0	0.764706	1	0
2004	1	0.0555556	29	3	5	40	social science	1	25	1	24	1	0.00308642	0.944444	1	1
2004	0	0	17	1	4	34	social science	0	0	0	5	1	0	0.96	1	0
2004	3	0.230769	13	2	5	27	social science	1	0	0	0	1	0.0532544	0.0769231	0	9
2004	17	0.326923	27	2	4	132	social science	1	154	92	62	1	0.106879	0.673077	0	289
2004	0	0	20	1	0	73	social science	0	0	0	2	1	0	0.142857	1	0
2004	0	0	19	5	0	39	social science	1	0	0	7	1	0	0.5	1	0
2004	2	0.25	12	1	0	25	social science	0	12	3	9	1	0.0625	0.75	1	4
2004	0	0	21	2	0	16	social science	1	0	0	10	1	0	1	1	0
2004	2	0.111111	11	6	0	41	social science	1	35	8	27	1	0.0123457	0.666667	1	4
2004	0	0	10	7	3	22	social science	1	7	1	6	1	0	1	1	0
2004	0	0	15	1	0	47	social science	0	0	0	2	1	0	1	1	0
2004	0	0	20	2	6	24	social science	0	8	3	5	1	0	1	1	0
2004	0	0	12	1	0	25	social science	0	0	0	1	1	0	0.0454545	1	0
2004	0	0	9	2	0	58	social science	1	0	0	0	1	0	0.512821	0	0
2004	0	0	26	1	6	94	social science	0	0	0	4	1	0	0.6875	1	0
2004	0	0	22	2	6	22	social science	0	5	2	3	1	0	1	1	0
2004	2	0.0952381	11	1	0	47	social science	0	0	0	7	1	0.0090703	0.761905	1	4
2004	2	0.166667	6	2	0	19	social science	0	0	0	6	1	0.0277778	0.75	1	4
2004	7	0.318182	18	3	4	33	social science	0	3	1	2	1	0.10124	0.590909	1	49
2004	1	0.333333	7	8	7	10	social science	0	6	4	2	1	0.111111	0.666667	0	1
2004	2	0.0645161	18	3	6	42	social science	1	0	0	24	1	0.00416233	0.709677	1	4
2004	0	0	18	5	5	50	social science	0	96	19	77	1	0	0.612903	1	0
2004	0	0	20	2	6	36	social science	0	30	5	25	1	0	0.736842	1	0
2004	1	0.166667	20	3	0	51	social science	1	0	0	4	1	0.0277778	0.666667	1	1
2004	0	0	6	3	0	22	social science	1	9	1	8	1	0	0.789474	1	0
2004	0	0	7	2	0	22	social science	1	8	3	5	1	0	0.5625	1	0
2004	1	0.015873	32	3	5	102	social science	0	33	9	24	1	0.000251953	0.952381	1	1
2004	1	0.0666667	7	6	0	18	social science	1	10	2	8	1	0.00444444	0.933333	1	1
2004	29	0.690476	15	4	0	59	social science	1	65	54	11	0	0.476757	0.166667	0	841
2004	0	0	24	3	0	30	social science	1	0	0	25	1	0	0.304348	1	0
2004	1	0.0909091	30	3	0	15	social science	1	5	1	4	1	0.00826446	0.0909091	1	1
2004	0	0	19	1	0	201	social science	0	43	3	40	1	0	0.94	1	0
2004	0	0	19	2	5	16	social science	1	15	5	10	1	0	1	1	0
2004	0	0	22	1	0	20	social science	0	3	1	2	1	0	1	1	0
2004	0	0	29	2	4	66	social science	1	22	2	20	1	0	1	1	0
2004	0	0	17	2	4	25	social science	1	0	0	5	1	0	0.941176	1	0
2004	1	0.0434783	24	3	0	31	social science	1	5	1	4	1	0.00189036	0.956522	1	1
2004	0	0	16	4	0	26	social science	0	17	4	13	1	0	1	1	0
2004	1	1	16	2	0	38	social science	0	0	0	13	0	1	0	1	1
2004	1	1	14	2	0	13	social science	0	0	0	4	0	1	0	1	1
2004	0	0	19	1	0	34	social science	0	7	2	5	1	0	0.5	1	0
2004	0	0	6	2	0	16	social science	0	0	0	0	1	0	1	0	0
2004	1	0.025641	16	4	0	67	social science	1	47	5	42	1	0.000657462	0.692308	1	1
2004	0	0	15	4	4	26	social science	1	27	5	22	1	0	0.6	1	0
2004	0	0	28	1	5	34	humanities	0	19	2	17	1	0		1	0
2004	3	0.142857	10	3	4	31	social science	1	31	15	16	1	0.0204082	0.857143	1	9
2004	0	0	3	1	0	9	humanities	0	0	0	0	1	0		0	0
2004	0	0	19	3	0	20	social science	1	0	0	6	1	0	1	1	0
2004	1	0.1	4	3	0	11	social science	0	15	2	13	1	0.01	0.9	1	1
2004	4	0.8	5	3	0	8	social science	1	0	0	0	0	0.64	0.2	0	16
2004	18	0.72	11	2	0	30	social science	1	8	4	4	0	0.5184	0.28	0	324
2004	1	0.0454545	14	1	2	38	social science	0	20	1	19	1	0.00206612	0.954545	1	1
2004	1	0.0294118	26	2	0	55	social science	0	4	3	1	1	0.000865052	0.852941	0	1
2004	0	0	24	2	5	21	social science	0	0	0	0	1	0	1	0	0
2004	11	0.916667	4	5	3	18	social science	1	6	4	2	0	0.840278	0	0	121
2004	23	0.676471	12	5	7	51	social science	1	13	12	1	0	0.457612	0.294118	0	529
2004	0	0	24	1	0	67	humanities	0	0	0	4	1	0		1	0
2004	1	0.0666667	7	2	0	33	social science	0	6	3	3	1	0.00444444	0.533333	0	1
2004	1	0.0434783	12	2	5	44	social science	0	82	27	55	1	0.00189036	0.956522	1	1
2004	1	0.0769231	12	2	5	48	social science	0	9	3	6	1	0.00591716	0.846154	1	1
2004	0	0	3	1	0	3	social science	0	0	0	0	1	0	1	0	0
2004	13	0.866667	5	8	0	24	social science	1	68	50	18	0	0.751111	0.133333	0	169
2004	0	0	21	1	0	22	social science	0	4	2	2	1	0	1	0	0
2004	0	0	21	2	0	24	social science	0	0	0	6	1	0	1	1	0
2004	5	0.333333	8	7	6	30	social science	1	0	0	0	1	0.111111	0.466667	0	25
2004	1	0.0625	16	2	0	39	social science	0	10	4	6	1	0.00390625	0.9375	1	1
2004	18	0.580645	10	4	0	37	social science	0	2	1	1	0	0.337149	0.0967742	0	324
2004	0	0	23	1	0	29	social science	0	0	0	1	1	0	1	1	0
2004	4	0.16	16	3	5	40	social science	1	49	8	41	1	0.0256	0.68	1	16
2004	2	0.0512821	11	2	3	53	social science	0	15	1	14	1	0.00262985	0.666667	1	4
2004	1	0.5	11	2	0	25	social science	0	0	0	5	0	0.25	0.5	1	1
2004	1	0.0769231	16	2	0	31	social science	0	4	2	2	1	0.00591716	0.692308	0	1
2004	0	0	10	3	0	23	social science	1	0	0	11	1	0	0.3125	1	0
2004	2	0.142857	24	2	7	20	social science	1	0	0	1	1	0.0204082	0.142857	1	4
2004	15	0.405405	12	3	4	62	social science	1	43	18	25	1	0.164354	0.513514	1	225
2004	12	0.461538	11	4	0	42	social science	1	21	15	6	1	0.213018	0.538462	0	144
2004	2	0.105263	22	3	0	35	humanities	1	17	6	11	1	0.0110803		1	4
2004	9	0.25	10	3	4	51	social science	0	4	3	1	1	0.0625	0.444444	0	81
2004	5	0.104167	15	4	4	73	social science	0	53	13	40	1	0.0108507	0.666667	1	25
2004	0	0	23	3	0	85	social science	0	47	6	41	1	0	0.775862	1	0
2004	0	0	12	2	0	23	social science	1	10	1	9	1	0	0.705882	1	0
2004	0	0	15	2	0	33	social science	1	0	0	19	1	0	0.8	1	0
2004	0	0	5	1	0	6	humanities	0	0	0	0	1	0		0	0
2004	4	0.137931	19	3	3	34	social science	0	0	0	1	1	0.019025	0.827586	1	16
2004	0	0	7	1	0	5	humanities	0	0	0	0	1	0		0	0
2004	5	0.416667	9	3	2	19	social science	1	8	2	6	1	0.173611	0.583333	1	25
2004	0	0	9	3	0	15	social science	1	0	0	4	1	0	1	1	0
2004	0	0	13	3	0	42	social science	1	8	2	6	1	0	0.75	1	0
2004	0	0	13	2	0	49	social science	0	0	0	4	1	0	0.692308	1	0
2004	1	0.0384615	16	3	0	41	social science	1	0	0	14	1	0.00147929	0.846154	1	1
2004	0	0	13	1	0	22	social science	0	0	0	2	1	0	1	1	0
2004	0	0	19	1	6	26	humanities	0	0	0	1	1	0		1	0
2004	0	0	17	1	15	11	social science	1	4	1	3	1	0	1	1	0
2004	2	0.666667	3	9	0	10	social science	0	2	1	1	0	0.444444	0	0	4
2004	2	0.105263	11	2	4	22	social science	0	30	15	15	1	0.0110803	0.684211	0	4
2004	2	0.0625	17	4	6	47	social science	1	81	4	77	1	0.00390625	0.875	1	4
2004	6	0.352941	9	6	6	26	social science	0	4	3	1	1	0.124567	0.647059	0	36
2004	0	0	10	3	8	35	social science	1	12	7	5	1	0	0.85	0	0
2004	0	0	18	4	0	57	social science	0	0	0	7	1	0	1	1	0
2004	1	0.0142857	21	4	5	96	social science	1	44	19	25	1	0.000204082	0.8	1	1
2004	1	0.037037	15	2	5	50	social science	1	93	6	87	1	0.00137174	0.962963	1	1
2004	1	0.05	12	1	0	30	social science	0	9	1	8	1	0.0025	0.95	1	1
2004	0	0	22	2	0	29	social science	0	6	1	5	1	0	1	1	0
2004	0	0	27	2	0	54	social science	0	0	0	0	1	0	0.782609	0	0
2004	33	0.916667	6	5	11	45	social science	1	0	17	0	0	0.840278	0.0833333	0	1089
2004	25	0.862069	8	4	5	30	social science	0	26	23	3	0	0.743163	0.137931	0	625
2004	4	0.444444	17	3	5	34	social science	0	35	22	13	1	0.197531	0.444444	0	16
2004	1	0.03125	18	2	0	66	social science	1	26	4	22	1	0.000976563	0.96875	1	1
2004	3	0.142857	4	6	0	30	social science	1	19	7	12	1	0.0204082	0.857143	1	9
2004	1	0.166667	15	3	4	26	social science	1	29	6	23	1	0.0277778	0.833333	1	1
2004	6	0.2	10	6	6	38	social science	1	14	4	10	1	0.04	0.566667	1	36
2004	3	0.1875	16	4	5	33	social science	0	17	9	8	1	0.0351562	0.0625	0	9
2004	0	0	11	2	0	46	social science	0	0	1	0	1	0	0.517241	0	0
2004	0	0	27	2	0	26	social science	1	10	1	9	1	0	0.705882	1	0
2004	2	0.166667	50	3	0	55	social science	1	0	0	0	1	0.0277778	0.833333	0	4
2004	0	0	4	1	2	10	social science	0	0	1	0	1	0	1	0	0
2004	3	0.2	21	3	8	30	social science	1	0	0	0	1	0.04	0.733333	0	9
2004	1	0.037037	20	3	4	50	social science	1	54	3	51	1	0.00137174	0.518519	1	1
2004	14	1	5	5	0	26	social science	0	4	3	1	0	1	0	0	196
2004	0	0	10	1	4	32	social science	0	3	1	2	1	0	1	1	0
2004	0	0	12	1	3	63	social science	0	17	1	16	1	0	0.956522	1	0
2004	0	0	19	2	0	43	social science	1	23	3	20	1	0	0.227273	1	0
2004	2	0.133333	8	6	6	24	social science	1	34	16	18	1	0.0177778	0.733333	1	4
2004	1	0.125	16	4	5	17	social science	1	15	9	6	1	0.015625	0.875	0	1
2004	11	0.44	18	4	5	37	social science	1	37	25	12	1	0.1936	0.56	0	121
2004	7	0.35	16	4	5	29	social science	1	19	13	6	1	0.1225	0.65	0	49
2004	1	0.111111	13	1	5	33	social science	0	3	1	2	1	0.0123457	0.111111	1	1
2004	10	0.5	14	3	5	42	social science	1	6	1	5	0	0.25	0.35	1	100
2004	20	1	7	1	6	31	social science	0	0	4	0	0	1	0	0	400
2004	0	0	14	1	3	18	social science	0	0	0	11	1	0	1	1	0
2004	2	0.117647	17	1	2	55	social science	0	27	6	21	1	0.0138408	0.294118	1	4
2004	1	0.25	10	3	3	31	social science	1	0	0	3	1	0.0625	0.5	1	1
2004	8	0.363636	20	3	5	42	social science	1	4	1	3	1	0.132231	0.272727	1	64
2004	5	0.277778	15	3	0	33	social science	1	0	0	5	1	0.0771605	0.277778	1	25
2004	0	0	12	3	0	19	social science	1	0	0	0	1	0	1	0	0
2004	0	0	16	2	0	35	social science	0	0	0	1	1	0	1	1	0
2004	1	0.0526316	12	2	0	25	social science	0	24	3	21	1	0.00277008	0.315789	1	1
2004	0	0	32	3	5	41	social science	1	0	0	6	1	0	0.606061	1	0
2004	7	0.241379	23	4	6	36	social science	1	47	8	39	1	0.058264	0.551724	1	49
2004	2	0.0416667	17	3	8	65	social science	1	15	2	13	1	0.00173611	0.75	1	4
2004	0	0	16	2	6	24	social science	0	0	0	3	1	0	0	1	0
2004	0	0	8	3	3	31	social science	1	10	3	7	1	0	0.4	1	0
2004	0	0	26	2	3	34	social science	1	19	2	17	1	0	0.888889	1	0
2004	2	0.25	28	4	5	39	social science	1	27	12	15	1	0.0625	0.625	1	4
2004	0	0	16	2	4	22	social science	1	2	1	1	1	0	1	0	0
2004	0	0	21	1	4	34	social science	0	0	0	7	1	0	1	1	0
2004	1	0.0666667	9	3	4	18	social science	1	29	3	26	1	0.00444444	0.533333	1	1
2004	0	0	19	4	6	26	social science	1	50	9	41	1	0	0.9375	1	0
2004	3	0.176471	9	2	3	40	social science	0	11	8	3	1	0.0311419	0.764706	0	9
2004	0	0	32	2	0	20	social science	1	36	9	27	1	0	0.75	1	0
2004	0	0	27	1	2	32	social science	0	28	5	23	1	0	0.344828	1	0
2004	0	0	13	1	0	24	social science	0	0	0	3	1	0	0.352941	1	0
2004	6	0.315789	25	2	3	29	social science	1	4	1	3	1	0.099723	0.684211	1	36
2004	0	0	24	2	4	19	social science	1	0	0	1	1	0	0.538462	1	0
2004	0	0	14	2	0	44	social science	1	42	5	37	1	0	0.95	1	0
2004	0	0	2	1	0	5	social science	1	7	2	5	1	0	1	1	0
2004	6	0.857143	14	1	0	23	social science	0	0	0	0	0	0.734694	0.142857	0	36
2004	0	0	24	2	6	78	social science	0	15	5	10	1	0	0.457143	1	0
2004	0	0	14	1	0	25	social science	0	0	0	0	1	0	1	0	0
2004	0	0	9	1	0	3	social science	0	0	0	8	1	0	1	1	0
2004	2	0.181818	8	2	4	27	social science	0	12	8	4	1	0.0330579	0.545455	0	4
2004	1	0.05	11	1	6	27	social science	0	7	1	6	1	0.0025	0.95	1	1
2004	0	0	9	3	4	19	social science	1	6	1	5	1	0	1	1	0
2004	2	0.0689655	17	1	4	65	social science	0	17	4	13	1	0.00475624	0.931035	1	4
2004	0	0	2	1	0	6	social science	0	0	0	1	1	0	1	1	0
2004	0	0	7	1	0	16	social science	0	0	0	0	1	0	0.166667	0	0
2004	1	0.0204082	24	2	0	71	social science	1	173	45	128	1	0.000416493	0.857143	1	1
2004	1	0.0526316	18	4	3	33	social science	1	84	47	37	1	0.00277008	0.894737	0	1
2004	15	0.681818	11	4	6	34	social science	1	83	54	29	0	0.464876	0.136364	0	225
2004	3	0.05	17	3	4	75	social science	1	100	12	88	1	0.0025	0.816667	1	9
2004	0	0	18	1	6	35	social science	0	21	5	16	1	0	0.636364	1	0
2004	1	0.142857	18	3	4	16	social science	1	14	4	10	1	0.0204082	0.714286	1	1
2004	2	1	6	1	4	8	social science	0	20	9	11	0	1	0	1	4
2004	2	0.0909091	12	2	5	50	social science	0	14	1	13	1	0.00826446	0.863636	1	4
2004	3	0.230769	16	2	0	39	social science	1	4	1	3	1	0.0532544	0.615385	1	9
2004	0	0	14	2	0	27	social science	1	11	5	6	1	0	0.153846	1	0
2004	23	0.851852	6	3	8	41	social science	0	7	4	3	0	0.725652	0.148148	0	529
2004	12	1	3	6	0	17	social science	0	0	14	0	0	1	0	0	144
2004	16	1	8	4	0	18	social science	1	8	3	5	0	1	0	1	256
2004	0	0	21	3	0	57	social science	1	23	2	21	1	0	1	1	0
2004	4	0.285714	4	3	0	14	social science	0	5	4	1	1	0.0816327	0.571429	0	16
2004	1	0.037037	13	2	0	38	social science	1	0	1	0	1	0.00137174	0.703704	0	1
2004	0	0	20	1	0	28	social science	0	0	1	0	1	0	1	0	0
2004	1	1	24	1	0	40	social science	0	0	0	1	0	1	0	1	1
2004	0	0	13	1	0	31	social science	0	0	0	4	1	0	1	1	0
2004	0	0	3	3	0	3	social science	0	0	0	3	1	0	1	1	0
2004	3	0.176471	16	3	0	36	social science	1	0	0	5	1	0.0311419	0.411765	1	9
2004	0	0	18	1	0	12	social science	0	0	0	0	1	0	1	0	0
2004	0	0	32	1	0	15	social science	0	0	0	5	1	0	1	1	0
2004	0	0	23	3	0	29	social science	1	0	0	2	1	0	1	1	0
2004	0	0	24	2	0	23	social science	1	4	1	3	1	0	1	1	0
2004	0	0	22	1	0	10	social science	0	0	0	0	1	0	1	0	0
2004	17	1	16	4	3	25	humanities	1	0	7	0	0	1		0	289
2004	6	0.545455	11	6	4	20	humanities	1	9	4	5	0	0.297521		1	36
2004	0	0	17	2	4	17	social science	0	2	1	1	1	0	1	0	0
2004	0	0	22	2	0	62	social science	1	4	2	2	1	0	0.941176	0	0
2004	2	0.117647	22	3	0	25	social science	1	35	19	16	1	0.0138408	0.823529	0	4
2004	0	0	12	1	0	68	social science	0	74	5	69	1	0	0.941176	1	0
2004	15	0.394737	45	2	7	57	social science	1	12	7	5	1	0.155817	0.605263	0	225
2004	0	0	8	2	5	9	social science	0	4	1	3	1	0	1	1	0
2004	0	0	39	3	3	57	social science	1	19	2	17	1	0	0.961538	1	0
2004	1	0.0344828	21	3	4	37	social science	1	34	2	32	1	0.00118906	0.793103	1	1
2004	8	0.5	25	2	0	27	social science	0	0	1	0	0	0.25	0.125	0	64
2004	0	0	18	2	6	41	social science	0	13	5	8	1	0	0.875	1	0
2004	0	0	24	4	4	17	social science	0	0	0	3	1	0	1	1	0
2004	1	0.047619	14	1	2	60	social science	0	7	1	6	1	0.00226757	0.904762	1	1
2004	2	0.117647	12	7	4	32	social science	1	28	13	15	1	0.0138408	0.647059	1	4
2004	1	0.027027	10	4	0	52	social science	1	12	5	7	1	0.00073046	0.837838	1	1
2004	1	0.0454545	14	1	5	51	social science	0	13	2	11	1	0.00206612	0.954545	1	1
2004	1	0.0588235	17	1	0	54	social science	0	9	2	7	1	0.00346021	0.764706	1	1
2004	2	0.0645161	14	2	0	94	social science	1	21	5	16	1	0.00416233	0.774194	1	4
2004	2	0.0689655	22	4	9	48	social science	1	6	4	2	1	0.00475624	0.482759	0	4
2004	4	0.2	22	2	4	53	social science	0	0	0	8	1	0.04	0.75	1	16
2004	1	0.0625	22	3	0	36	social science	1	14	2	12	1	0.00390625	0.9375	1	1
2004	0	0	13	2	0	32	social science	1	63	8	55	1	0	0.4	1	0
2004	0	0	11	4	0	21	social science	0	28	4	24	1	0	0.833333	1	0
2004	0	0	20	2	5	56	social science	1	0	0	18	1	0	0.857143	1	0
2004	1	0.0434783	23	69	5	62	social science	1	84	10	74	1	0.00189036	0.652174	1	1
2004	1	0.111111	25	4	4	17	social science	1	12	5	7	1	0.0123457	0.555556	1	1
2004	1	0.0212766	19	3	0	63	social science	1	7	2	5	1	0.000452693	0.957447	1	1
2004	0	0	35	1	6	60	social science	0	13	1	12	1	0	0.16	1	0
2004	0	0	26	3	0	19	social science	0	2	1	1	1	0	0.5	0	0
2004	0	0	21	2	0	56	social science	1	25	4	21	1	0	0.622222	1	0
2004	2	0.0869565	20	1	5	42	social science	0	0	0	8	1	0.00756144	0.652174	1	4
2004	0	0	12	1	0	13	social science	0	0	0	4	1	0	0.285714	1	0
2004	0	0	15	1	0	16	social science	0	0	0	4	1	0	1	1	0
2004	0	0	14	2	4	32	social science	1	0	0	4	1	0	0.333333	1	0
2004	0	0	27	1	4	43	social science	0	15	1	14	1	0	1	1	0
2004	0	0	14	1	5	32	social science	1	0	0	0	1	0	1	0	0
2004	4	0.571429	28	1	7	57	humanities	0	4	1	3	0	0.326531		1	16
2004	4	0.16	19	1	0	67	social science	0	0	0	2	1	0.0256	0.36	1	16
2004	0	0	11	2	0	18	social science	1	0	0	2	1	0	1	1	0
2004	0	0	19	2	4	49	social science	1	61	28	33	1	0	0.851852	1	0
2004	0	0	3	1	4	5	social science	0	14	2	12	1	0	0.5	1	0
2004	0	0	19	2	6	40	social science	1	24	6	18	1	0	0.545455	1	0
2004	0	0	33	2	0	41	social science	1	47	4	43	1	0	0.862069	1	0
2004	1	0.0208333	28	4	0	67	social science	1	0	0	6	1	0.000434028	0.708333	1	1
2004	0	0	27	1	0	96	social science	0	0	0	2	1	0	1	1	0
2004	1	0.125	23	2	0	30	social science	1	99	33	66	1	0.015625	0.75	1	1
2004	5	0.357143	26	3	0	33	social science	1	154	48	106	1	0.127551	0.642857	1	25
2004	4	0.210526	17	2	0	31	social science	0	7	2	5	1	0.0443213	0.631579	1	16
2004	10	0.322581	15	9	0	59	social science	1	30	16	14	1	0.104058	0.0967742	0	100
2004	2	0.0689655	7	1	0	46	social science	0	43	6	37	1	0.00475624	0.413793	1	4
2004	1	1	2	1	0	2	social science	0	0	0	0	0	1	0	0	1
2004	1	0.047619	17	2	0	60	social science	1	13	3	10	1	0.00226757	0.761905	1	1
2004	1	0.0357143	16	2	0	59	social science	0	9	3	6	1	0.00127551	0.857143	1	1
2004	0	0	14	1	0	59	social science	0	49	15	34	1	0	0.911765	1	0
2004	7	0.189189	21	2	0	57	social science	0	15	7	8	1	0.0357926	0.756757	1	49
2004	0	0	29	3	0	30	social science	1	13	1	12	1	0	0.315789	1	0
2004	2	0.0869565	29	1	0	76	social science	0	6	2	4	1	0.00756144	0.782609	1	4
2004	0	0	18	7	0	28	humanities	1	0	0	1	1	0		1	0
2004	4	0.444444	4	5	0	36	social science	1	17	4	13	1	0.197531	0.555556	1	16
2004	0	0	15	1	4	28	social science	0	65	27	38	1	0	1	1	0
2004	5	0.3125	26	2	0	50	social science	0	13	3	10	1	0.0976562	0.6875	1	25
2004	0	0	16	1	0	12	social science	0	0	0	0	1	0	1	0	0
2004	2	0.1	9	1	3	30	social science	0	0	0	0	1	0.01	0.85	0	4
2004	1	0.0454545	27	1	0	43	social science	0	0	0	5	1	0.00206612	0.909091	1	1
2004	0	0	15	2	0	44	social science	1	0	0	17	1	0	0.921053	1	0
2004	8	0.363636	11	3	0	27	social science	0	7	4	3	1	0.132231	0.5	0	64
2004	0	0	21	3	5	43	social science	1	15	1	14	1	0	0.83871	1	0
2004	8	0.4	15	3	5	51	social science	1	4	2	2	1	0.16	0.55	0	64
2004	36	0.765957	10	1	8	118	social science	0	48	32	16	0	0.586691	0.234043	0	1296
2004	0	0	19	1	0	61	social science	0	0	0	1	1	0	1	1	0
2004	0	0	3	1	0	3	social science	0	0	0	0	1	0	1	0	0
2004	0	0	21	1	0	91	social science	0	31	4	27	1	0	0.666667	1	0
2004	7	0.466667	11	2	0	22	social science	0	3	2	1	1	0.217778	0.533333	0	49
2004	0	0	18	2	4	29	social science	1	0	0	3	1	0	1	1	0
2004	0	0	8	1	4	14	social science	0	0	0	1	1	0	1	1	0
2004	1	0.0625	6	1	3	23	social science	0	0	0	5	1	0.00390625	0.8125	1	1
2004	1	0.0666667	31	3	0	43	social science	1	16	8	8	1	0.00444444	0.133333	0	1
2004	2	0.0606061	17	2	5	53	social science	0	34	8	26	1	0.00367309	0.757576	1	4
2004	12	0.162162	15	4	4	121	social science	1	32	16	16	1	0.0262966	0.783784	0	144
2004	20	0.689655	14	3	3	49	social science	1	34	21	13	0	0.475624	0.241379	0	400
2004	1	0.166667	13	3	5	18	social science	1	15	10	5	1	0.0277778	0.166667	0	1
2004	0	0	14	2	0	21	social science	1	14	8	6	1	0	1	0	0
2004	0	0	12	3	0	47	social science	0	23	4	19	1	0	0.961538	1	0
2004	0	0	17	7	0	25	social science	1	19	2	17	1	0	0.846154	1	0
2004	1	0.0714286	28	2	0	41	humanities	1	10	7	3	1	0.00510204		0	1
2004	0	0	14	4	4	29	social science	1	27	4	23	1	0	1	1	0
2004	2	0.0465116	28	2	5	60	social science	1	17	3	14	1	0.00216333	0.953488	1	4
2004	0	0	31	2	5	62	social science	1	24	5	19	1	0	0.941176	1	0
2004	0	0	9	4	4	14	social science	1	13	8	5	1	0	1	0	0
2004	0	0	15	3	0	80	social science	0	21	5	16	1	0	0.945946	1	0
2004	11	0.478261	29	1	0	45	social science	0	4	3	1	1	0.228733	0.521739	0	121
2004	0	0	12	3	4	28	social science	1	126	86	40	1	0	1	0	0
2004	4	0.571429	2	4	0	10	social science	1	15	10	5	0	0.326531	0.428571	0	16
2004	22	0.758621	12	4	0	47	social science	0	7	5	2	0	0.575505	0.0344828	0	484
2004	0	0	13	9	4	63	social science	1	29	1	28	1	0	0.918919	1	0
2004	2	0.2	8	2	0	21	social science	0	5	2	3	1	0.04	0.3	1	4
2004	0	0	23	2	6	49	social science	1	3	2	1	1	0	0	0	0
2004	0	0	8	3	0	15	social science	1	0	0	1	1	0	1	1	0
2004	1	0.027027	19	2	0	55	social science	1	14	3	11	1	0.00073046	0.972973	1	1
2004	0	0	5	4	7	17	social science	0	11	5	6	1	0	1	1	0
2004	0	0	21	1	5	24	social science	0	70	13	57	1	0	1	1	0
2004	1	0.0625	20	2	0	53	social science	1	47	1	46	1	0.00390625	0.625	1	1
2004	14	0.933333	8	1	0	47	social science	0	0	0	0	0	0.871111	0.0666667	0	196
2004	10	0.769231	14	1	4	33	social science	0	0	0	0	0	0.591716	0.230769	0	100
2004	3	0.25	13	3	4	27	social science	0	12	2	10	1	0.0625	0.583333	1	9
2004	7	0.5	6	3	0	26	social science	1	29	18	11	0	0.25	0.357143	0	49
2004	3	0.428571	1	2	0	7	social science	1	0	0	1	1	0.183673	0.571429	1	9
2004	0	0	4	1	0	11	social science	0	8	2	6	1	0	0	1	0
2004	0	0	20	2	0	52	social science	1	15	2	13	1	0	0.52	1	0
2004	0	0	13	1	0	7	social science	1	11	1	10	1	0	1	1	0
2004	7	0.25	27	2	0	115	social science	1	8	5	3	1	0.0625	0.321429	0	49
2004	0	0	19	1	0	19	social science	0	0	0	0	1	0	0.875	0	0
2004	0	0	16	6	0	33	social science	1	26	6	20	1	0	0.904762	1	0
2004	0	0	19	1	0	21	social science	0	0	0	9	1	0	1	1	0
2004	0	0	22	4	0	17	social science	1	4	2	2	1	0	1	0	0
2004	0	0	22	3	0	18	social science	1	7	2	5	1	0	0.666667	1	0
2004	3	0.12	19	3	0	32	social science	1	0	0	2	1	0.0144	0.6	1	9
2004	6	0.285714	21	2	0	57	social science	0	3	2	1	1	0.0816327	0.666667	0	36
2004	0	0	26	1	0	60	social science	0	10	2	8	1	0	1	1	0
2004	0	0	23	3	0	41	social science	0	14	5	9	1	0	0.5	1	0
2004	2	0.25	10	3	4	29	social science	1	28	11	17	1	0.0625	0.75	1	4
2004	9	0.204545	24	2	4	63	social science	1	0	0	6	1	0.0418388	0.613636	1	81
2004	0	0	25	2	5	49	social science	1	0	0	3	1	0	0.73913	1	0
2004	6	0.4	20	2	5	54	social science	1	7	3	4	1	0.16	0.6	1	36
2004	10	0.136986	15	1	6	84	social science	0	14	4	10	1	0.0187652	0.863014	1	100
2004	2	0.0392157	8	4	0	64	social science	1	27	2	25	1	0.00153787	0.72549	1	4
2004	0	0	13	2	2	18	social science	1	0	0	5	1	0	1	1	0
2004	3	0.6	19	5	6	17	social science	1	8	4	4	0	0.36	0.4	0	9
2004	0	0	8	5	8	5	social science	1	0	0	2	1	0	0	1	0
2004	0	0	10	2	0	18	social science	0	2	1	1	1	0	1	0	0
2004	1	0.0204082	14	3	6	100	social science	1	35	3	32	1	0.000416493	0.571429	1	1
2004	7	0.7	12	6	4	53	social science	1	27	16	11	0	0.49	0.3	0	49
2004	8	0.727273	13	7	9	33	social science	1	10	5	5	0	0.528926	0.272727	0	64
2004	1	0.0333333	34	3	5	34	social science	1	0	0	4	1	0.00111111	0.5	1	1
2004	0	0	15	3	3	39	social science	1	0	0	3	1	0	1	1	0
2004	0	0	36	131	5	99	social science	1	57	12	45	1	0	0.904762	1	0
2004	0	0	19	5	6	54	social science	1	0	0	11	1	0	0.413793	1	0
2004	0	0	8	1	0	26	social science	1	4	1	3	1	0	1	1	0
2004	0	0	16	2	0	43	social science	0	13	1	12	1	0	1	1	0
2004	0	0	14	2	5	25	social science	1	6	1	5	1	0	0.85	1	0
2004	0	0	10	1	0	14	social science	0	0	0	5	1	0	0.375	1	0
2004	1	0.0588235	23	3	4	24	social science	1	0	0	3	1	0.00346021	0.882353	1	1
2004	0	0	21	4	5	24	social science	1	68	15	53	1	0	1	1	0
2004	0	0	23	2	0	48	social science	1	33	5	28	1	0	0.636364	1	0
2004	2	0.117647	9	3	0	31	social science	1	91	33	58	1	0.0138408	0.882353	1	4
2004	1	0.025	20	1	3	78	social science	0	20	6	14	1	0.000625	0.975	1	1
2004	1	0.0277778	18	2	0	56	social science	1	50	1	49	1	0.000771605	0.611111	1	1
2004	5	0.555556	11	2	0	26	social science	0	8	4	4	0	0.308642	0.444444	0	25
2004	7	0.875	9	4	3	13	social science	1	14	7	7	0	0.765625	0.125	0	49
2004	2	0.5	19	3	4	11	social science	0	11	6	5	0	0.25	0	0	4
2004	4	0.4	23	3	3	18	social science	0	5	3	2	1	0.16	0.6	0	16
2004	2	0.285714	35	1	4	38	social science	0	12	3	9	1	0.0816327	0.714286	1	4
2004	0	0	16	3	0	59	social science	1	0	0	6	1	0	0.465116	1	0
2004	4	0.0833333	17	1	2	69	social science	0	0	0	7	1	0.00694444	0.916667	1	16
2004	4	0.333333	24	2	4	55	social science	1	0	0	0	1	0.111111	0.666667	0	16
2004	11	0.846154	20	3	5	77	social science	1	0	0	0	0	0.715976	0.153846	0	121
2004	1	0.04	11	1	5	46	social science	0	34	4	30	1	0.0016	0.84	1	1
2004	0	0	11	4	0	49	social science	1	0	0	6	1	0	0.47619	1	0
2004	0	0	2	1	0	11	social science	0	0	0	1	1	0	1	1	0
2004	1	0.125	13	2	0	51	social science	1	17	5	12	1	0.015625	0.875	1	1
2004	12	0.631579	21	3	3	33	social science	0	0	1	0	0	0.398892	0.315789	0	144
2004	2	0.1	9	1	6	66	social science	0	2	1	1	1	0.01	0.55	0	4
2004	0	0	15	1	0	39	social science	0	0	0	0	1	0	1	0	0
2004	0	0	9	2	0	8	social science	1	7	1	6	1	0	1	1	0
2004	0	0	5	1	0	4	social science	0	6	2	4	1	0	1	1	0
2004	34	0.618182	26	2	0	78	social science	1	3	1	2	0	0.382149	0.381818	1	1156
2004	0	0	13	3	0	26	social science	1	28	8	20	1	0	0.9	1	0
2004	0	0	12	3	0	42	social science	1	4	1	3	1	0	0.772727	1	0
2004	7	0.259259	13	9	5	53	social science	1	25	10	15	1	0.0672154	0.555556	1	49
2004	11	0.333333	11	6	4	46	social science	0	20	8	12	1	0.111111	0.393939	1	121
2004	6	0.75	11	3	0	36	social science	0	106	52	54	0	0.5625	0.25	1	36
2004	6	0.857143	9	2	0	30	social science	0	5	2	3	0	0.734694	0.142857	1	36
2004	0	0	29	2	0	53	social science	1	0	0	23	1	0	0.818182	1	0
2004	6	0.375	35	1	4	52	social science	0	0	0	15	1	0.140625	0.625	1	36
2004	4	0.307692	22	2	0	41	humanities	1	52	9	43	1	0.0946746		1	16
2004	0	0	3	1	0	9	humanities	0	0	0	0	1	0		0	0
2004	0	0	14	2	0	25	social science	0	0	0	0	1	0	0.7	0	0
2004	4	0.285714	18	2	0	44	social science	0	0	0	0	1	0.0816327	0.642857	0	16
2004	0	0	14	1	0	38	social science	0	0	0	0	1	0	0.5	0	0
2004	0	0	7	2	0	12	social science	0	0	0	0	1	0	1	0	0
2004	0	0	21	1	0	31	social science	0	8	3	5	1	0	1	1	0
2004	5	0.333333	12	2	5	22	social science	0	0	3	0	1	0.111111	0.666667	0	25
2004	2	0.125	19	3	0	33	social science	0	54	7	47	1	0.015625	0.8125	1	4
2004	1	0.0526316	16	4	0	38	social science	0	17	3	14	1	0.00277008	0.947368	1	1
2004	0	0	20	3	0	28	social science	1	25	1	24	1	0	0.6	1	0
2004	2	1	21	1	0	54	social science	0	8	2	6	0	1	0	1	4
2004	11	0.916667	15	2	5	37	humanities	0	0	8	0	0	0.840278		0	121
2004	0	0	16	2	6	20	social science	0	0	0	2	1	0	0	1	0
2004	41	0.694915	21	1	7	128	social science	0	21	9	12	0	0.482907	0.237288	1	1681
2004	0	0	10	1	4	8	social science	0	0	0	6	1	0	0.8	1	0
2004	0	0	16	2	4	14	social science	0	6	4	2	1	0	1	0	0
2004	0	0	4	3	5	6	social science	1	33	5	28	1	0	0.75	1	0
2004	2	0.0909091	18	2	5	35	social science	1	5	1	4	1	0.00826446	0.863636	1	4
2004	15	0.535714	10	4	4	41	social science	0	0	1	0	0	0.28699	0.285714	0	225
2004	0	0	17	1	0	63	social science	0	0	0	5	1	0	1	1	0
2004	0	0	14	2	0	71	social science	0	13	1	12	1	0	0.204545	1	0
2004	3	0.1875	8	5	3	23	social science	1	19	5	14	1	0.0351562	0.6875	1	9
2004	5	0.714286	6	2	0	14	social science	0	0	3	0	0	0.510204	0.285714	0	25
2004	0	0	12	2	0	13	social science	0	26	20	6	1	0	1	0	0
2004	1	0.0714286	13	2	0	18	social science	1	10	3	7	1	0.00510204	0.357143	1	1
2004	9	0.219512	22	3	9	65	social science	1	106	68	38	1	0.0481856	0.634146	0	81
2004	1	0.333333	15	1	5	12	social science	0	0	0	0	1	0.111111	0.666667	0	1
2004	2	0.166667	14	3	4	25	social science	0	12	1	11	1	0.0277778	0.833333	1	4
2004	2	0.0952381	17	3	7	42	social science	1	28	3	25	1	0.0090703	0.857143	1	4
2004	0	0	20	3	4	67	social science	0	5	1	4	1	0	0.666667	1	0
2004	4	0.210526	25	3	4	53	social science	0	7	2	5	1	0.0443213	0.631579	1	16
2004	1	0.0188679	20	1	4	109	social science	0	17	2	15	1	0.000355999	0.735849	1	1
2004	0	0	17	3	11	32	social science	1	20	6	14	1	0	0.307692	1	0
2004	2	0.0645161	17	2	4	56	social science	0	23	6	17	1	0.00416233	0.645161	1	4
2004	0	0	17	3	3	30	social science	1	24	1	23	1	0	0.916667	1	0
2004	0	0	16	2	3	38	social science	1	0	0	1	1	0	1	1	0
2004	1	0.0322581	11	2	0	41	social science	0	10	2	8	1	0.00104058	0.645161	1	1
2004	1	0.0263158	15	3	5	50	social science	0	0	0	15	1	0.000692521	0.789474	1	1
2004	8	0.533333	31	1	0	42	social science	0	7	4	3	0	0.284444	0.333333	0	64
2004	0	0	29	2	3	16	social science	1	16	1	15	1	0	0.875	1	0
2004	0	0	11	3	0	49	social science	1	19	6	13	1	0	0.34375	1	0
2004	1	0.0384615	14	3	0	44	social science	0	194	30	164	1	0.00147929	0.384615	1	1
2004	1	0.0322581	25	2	4	41	social science	0	23	3	20	1	0.00104058	0.645161	1	1
2004	0	0	25	2	6	29	social science	1	9	1	8	1	0	0.461538	1	0
2004	1	0.0666667	13	2	6	56	social science	1	4	1	3	1	0.00444444	0.933333	1	1
2004	0	0	49	1	6	39	humanities	0	0	0	0	1	0		0	0
2004	3	0.0681818	27	1	0	112	social science	0	0	0	1	1	0.00464876	0.704545	1	9
2004	0	0	11	2	0	21	social science	1	76	5	71	1	0	0.294118	1	0
2004	1	0.047619	26	3	5	30	social science	1	8	1	7	1	0.00226757	0.714286	1	1
2004	0	0	22	3	4	34	social science	1	44	5	39	1	0	0.392857	1	0
2004	0	0	7	3	3	4	social science	1	6	2	4	1	0	1	1	0
2004	0	0	24	1	3	17	social science	0	0	0	2	1	0	1	1	0
2004	0	0	17	1	0	19	social science	0	0	0	7	1	0	0.941176	1	0
2004	1	0.03125	9	2	0	50	social science	0	0	0	1	1	0.000976563	0.96875	1	1
2004	1	0.0212766	12	6	0	57	social science	1	20	1	19	1	0.000452693	0.914894	1	1
2004	0	0	20	2	0	16	social science	0	9	3	6	1	0	0.428571	1	0
2004	0	0	1	2	0	1	social science	1	0	0	1	1	0	1	1	0
2004	0	0	33	1	0	54	social science	0	0	0	3	1	0	0.4	1	0
2004	1	0.1	16	1	7	20	social science	1	0	0	0	1	0.01	0.9	0	1
2004	2	0.125	16	2	5	31	social science	0	26	10	16	1	0.015625	0.625	1	4
2004	0	0	2	2	0	6	social science	1	0	0	0	1	0	1	0	0
2004	31	0.815789	10	5	3	49	social science	1	12	8	4	0	0.665512	0.184211	0	961
2004	0	0	16	3	0	74	humanities	1	29	6	23	1	0		1	0
2004	2	0.142857	15	1	4	31	social science	0	23	2	21	1	0.0204082	0.857143	1	4
2004	4	0.137931	27	1	0	134	social science	0	11	1	10	1	0.019025	0.655172	1	16
2004	10	0.625	5	2	0	22	social science	0	16	10	6	0	0.390625	0.0625	0	100
2004	1	0.0588235	15	1	0	53	social science	0	0	0	5	1	0.00346021	0.941176	1	1
2004	2	0.2	14	2	0	15	social science	0	7	3	4	1	0.04	0.4	1	4
2004	4	0.266667	8	2	0	28	social science	1	9	3	6	1	0.0711111	0.4	1	16
2004	0	0	29	3	0	32	social science	0	11	1	10	1	0	0.818182	1	0
2004	0	0	29	3	0	21	social science	1	22	4	18	1	0	0.615385	1	0
2004	10	0.769231	19	3	0	30	social science	1	0	0	0	0	0.591716	0.230769	0	100
2004	1	0.1	23	2	0	34	humanities	1	0	0	0	1	0.01		0	1
2004	8	0.666667	6	3	0	17	social science	1	0	0	1	0	0.444444	0.333333	1	64
2004	0	0	4	2	0	14	social science	1	0	0	1	1	0	1	1	0
2004	19	0.655172	18	4	6	36	social science	1	5	4	1	0	0.429251	0.206897	0	361
2004	1	0.0555556	8	1	5	23	social science	0	51	20	31	1	0.00308642	0.944444	1	1
2004	6	0.214286	8	3	6	40	social science	0	86	29	57	1	0.0459184	0.178571	1	36
2004	3	0.2	10	3	0	25	social science	0	16	8	8	1	0.04	0.666667	0	9
2004	0	0	10	2	5	27	social science	0	5	2	3	1	0	1	1	0
2004	3	0.136364	16	1	0	37	social science	0	0	0	8	1	0.018595	0.454545	1	9
2004	0	0	3	3	0	9	social science	1	21	1	20	1	0	1	1	0
2004	8	0.216216	19	4	0	46	social science	1	17	6	11	1	0.0467495	0.783784	1	64
2004	10	0.416667	9	3	3	42	social science	0	3	1	2	1	0.173611	0.375	1	100
2004	0	0	32	3	0	27	social science	0	0	0	0	1	0	1	0	0
2004	0	0	6	3	0	21	social science	1	0	0	1	1	0	1	1	0
2004	1	0.5	14	2	0	19	social science	0	13	3	10	0	0.25	0.5	1	1
2004	0	0	25	2	0	69	social science	0	0	0	9	1	0	1	1	0
2004	13	0.342105	27	3	0	78	social science	1	0	0	0	1	0.117036	0.657895	0	169
2004	0	0	22	2	0	45	social science	1	89	13	76	1	0	0.8	1	0
2004	2	0.0294118	15	4	0	90	social science	1	67	7	60	1	0.000865052	0.882353	1	4
2004	0	0	6	1	3	5	social science	0	0	1	0	1	0	1	0	0
2004	37	0.880952	18	4	0	97	social science	0	0	0	0	0	0.776077	0	0	1369
2004	6	0.857143	13	4	3	28	social science	0	27	20	7	0	0.734694	0	0	36
2004	0	0	21	1	5	50	social science	0	9	4	5	1	0	1	1	0
2004	0	0	15	3	6	14	social science	0	0	0	0	1	0	0.25	0	0
2004	0	0	30	2	0	34	social science	1	0	0	2	1	0	1	1	0
2004	1	0.0625	35	2	0	23	social science	1	0	0	5	1	0.00390625	0.9375	1	1
2004	0	0	16	3	6	37	social science	1	0	0	2	1	0	0.65	1	0
2004	13	0.40625	15	3	5	45	social science	0	0	0	2	1	0.165039	0.3125	1	169
2004	11	0.289474	10	7	0	54	social science	1	24	5	19	1	0.083795	0.657895	1	121
2004	0	0	6	2	0	11	social science	0	5	3	2	1	0	1	0	0
2004	0	0	8	4	8	10	social science	0	24	12	12	1	0	1	0	0
2004	2	0.5	9	3	0	13	social science	1	0	2	0	0	0.25	0.5	0	4
2004	4	0.133333	18	3	0	60	social science	0	0	0	9	1	0.0177778	0.466667	1	16
2004	0	0	31	3	5	87	social science	0	21	1	20	1	0	0.810345	1	0
2004	6	0.206897	16	3	4	39	social science	0	0	0	0	1	0.0428062	0.448276	0	36
2004	6	0.113208	18	2	0	68	social science	1	22	1	21	1	0.0128159	0.886792	1	36
2004	3	0.0666667	41	2	2	56	social science	1	59	6	53	1	0.00444444	0.288889	1	9
2004	4	0.133333	37	2	6	40	social science	1	32	4	28	1	0.0177778	0.333333	1	16
2004	8	0.5	31	4	8	70	social science	1	14	7	7	0	0.25	0.5	0	64
2004	0	0	26	5	5	115	social science	1	55	5	50	1	0	0.735849	1	0
2004	2	0.105263	20	3	3	36	social science	1	12	6	6	1	0.0110803	0.473684	0	4
2004	3	0.0967742	11	4	0	51	social science	1	46	19	27	1	0.00936524	0.451613	1	9
2004	1	0.00909091	36	1	0	181	social science	0	13	1	12	1	8.26e-05	0.781818	1	1
2004	2	0.0666667	20	1	3	53	social science	0	29	1	28	1	0.00444444	0.9	1	4
2004	0	0	15	3	3	46	social science	1	16	1	15	1	0	0.666667	1	0
2004	0	0	21	3	0	30	social science	1	0	0	3	1	0	0.823529	1	0
2004	0	0	17	1	6	12	humanities	0	0	0	0	1	0		0	0
2004	0	0	26	1	0	53	social science	0	0	0	0	1	0	1	0	0
2004	2	0.0392157	14	3	0	78	social science	1	52	12	40	1	0.00153787	0.784314	1	4
2004	0	0	15	2	0	59	social science	1	31	2	29	1	0	0.235294	1	0
2004	1	0.05	18	3	0	35	social science	1	0	0	3	1	0.0025	0.95	1	1
2004	0	0	9	1	0	25	social science	0	7	1	6	1	0	1	1	0
2004	0	0	9	1	0	25	social science	0	0	0	3	1	0	1	1	0
2004	19	0.730769	9	2	8	38	social science	0	7	5	2	0	0.534024	0.115385	0	361
2004	1	0.0714286	33	3	5	47	social science	1	24	5	19	1	0.00510204	0.785714	1	1
2004	0	0	6	1	4	33	social science	0	0	1	0	1	0	1	0	0
2004	3	0.0612245	13	2	0	65	social science	1	0	0	4	1	0.00374844	0.877551	1	9
2004	1	0.0243902	27	3	0	85	social science	1	24	4	20	1	0.000594884	0.731707	1	1
2004	4	0.2	10	5	0	28	social science	0	17	5	12	1	0.04	0.5	1	16
2004	0	0	15	3	3	27	social science	0	0	0	9	1	0	1	1	0
2004	2	0.0416667	19	1	0	86	social science	0	18	6	12	1	0.00173611	0.9375	1	4
2004	1	0.0232558	19	2	0	60	social science	1	17	1	16	1	0.000540833	0.27907	1	1
2004	4	0.137931	9	2	4	42	social science	0	14	3	11	1	0.019025	0.62069	1	16
2004	3	0.1	9	2	4	40	social science	0	12	2	10	1	0.01	0.533333	1	9
2004	3	0.75	5	2	5	10	social science	0	24	16	8	0	0.5625	0.25	0	9
2004	0	0	10	4	3	19	social science	1	35	7	28	1	0	0.944444	1	0
2004	2	0.125	12	3	7	21	social science	0	14	3	11	1	0.015625	0.8125	1	4
2004	2	0.105263	15	3	6	27	social science	1	4	1	3	1	0.0110803	0.789474	1	4
2004	0	0	6	1	0	9	social science	0	0	0	2	1	0	1	1	0
2004	1	0.0625	29	5	5	50	social science	0	105	20	85	1	0.00390625	0.25	1	1
2004	1	0.25	17	1	0	27	humanities	0	28	17	11	1	0.0625	0.25	0	1
2004	7	0.333333	23	1	0	55	social science	0	6	3	3	1	0.111111	0.666667	0	49
2004	0	0	6	2	0	17	social science	0	13	1	12	1	0	1	1	0
2004	0	0	12	1	0	21	social science	0	6	1	5	1	0	1	1	0
2004	1	0.25	7	4	13	21	social science	0	7	4	3	1	0.0625	0.75	0	1
2004	18	0.947368	19	2	4	29	humanities	0	11	10	1	0	0.897507		0	324
2004	3	0.0681818	24	5	4	58	social science	1	36	4	32	1	0.00464876	0.863636	1	9
2004	2	0.0833333	40	2	0	48	social science	1	31	7	24	1	0.00694444	0.833333	1	4
2004	0	0	17	3	0	24	social science	0	25	5	20	1	0	1	1	0
2004	1	0.0434783	20	1	0	29	social science	0	18	1	17	1	0.00189036	0.869565	1	1
2004	0	0	10	3	0	17	social science	1	14	5	9	1	0	1	1	0
2004	0	0	11	2	3	10	social science	1	0	0	0	1	0	0.833333	0	0
2004	1	0.0625	15	5	0	29	social science	1	53	5	48	1	0.00390625	0.6875	1	1
2004	0	0	28	3	6	96	social science	1	0	0	0	1	0	1	0	0
2004	0	0	23	2	0	45	social science	1	45	14	31	1	0	0.944444	1	0
2004	12	0.545455	8	5	6	37	social science	0	18	13	5	0	0.297521	0.363636	0	144
2004	1	0.0909091	11	3	4	20	social science	1	10	6	4	1	0.00826446	0.909091	0	1
2004	1	0.166667	9	2	4	29	social science	0	5	1	4	1	0.0277778	0.833333	1	1
2004	0	0	11	2	3	37	social science	1	0	0	1	1	0	1	1	0
2004	0	0	19	3	0	51	social science	1	0	0	2	1	0	0.692308	1	0
2004	6	0.461538	20	1	0	55	social science	0	0	0	0	1	0.213018	0.538462	0	36
2004	0	0	16	1	3	54	social science	0	10	7	3	1	0	1	0	0
2004	0	0	11	3	0	59	social science	1	106	17	89	1	0	0.820513	1	0
2004	0	0	15	2	7	87	social science	1	9	3	6	1	0	0.948718	1	0
2004	1	0.0416667	8	2	0	48	social science	0	0	0	9	1	0.00173611	0.75	1	1
2004	0	0	11	2	3	48	social science	1	3	2	1	1	0	0.948718	0	0
2004	0	0	10	8	4	20	social science	0	0	0	5	1	0	1	1	0
2004	0	0	22	3	4	6	social science	1	0	0	2	1	0	1	1	0
2004	0	0	18	1	3	12	social science	1	32	19	13	1	0	0.75	0	0
2004	1	0.0714286	23	1	6	23	social science	1	0	0	8	1	0.00510204	0.142857	1	1
2004	3	0.272727	17	2	3	20	social science	1	0	0	7	1	0.0743802	0.727273	1	9
2004	12	0.48	17	2	7	41	social science	0	10	3	7	1	0.2304	0.48	1	144
2004	0	0	21	3	0	25	social science	1	0	0	2	1	0	0.384615	1	0
2004	25	0.595238	32	2	7	62	social science	1	27	16	11	0	0.354308	0.404762	0	625
2004	4	0.266667	10	2	0	24	humanities	0	21	1	20	1	0.0711111	0.666667	1	16
2004	0	0	30	1	7	24	humanities	0	37	18	19	1	0	1	1	0
2004	1	0.25	15	2	5	22	humanities	0	37	14	23	1	0.0625	0.5	1	1
2004	0	0	12	1	5	15	humanities	0	16	2	14	1	0	1	1	0
2004	4	0.363636	17	2	11	27	humanities	0	0	0	1	1	0.132231	0.454545	1	16
2004	3	0.214286	6	5	0	19	social science	1	0	0	2	1	0.0459184	0.785714	1	9
2004	2	0.166667	10	3	4	33	social science	0	2	1	1	1	0.0277778	0	0	4
2004	9	0.692308	17	2	0	25	social science	1	9	6	3	0	0.47929	0.307692	0	81
2004	3	0.166667	7	3	0	31	social science	1	9	5	4	1	0.0277778	0.333333	0	9
2004	0	0	12	2	0	19	social science	1	10	1	9	1	0	1	1	0
2004	21	1	10	6	7	35	social science	1	70	67	3	0	1	0	0	441
2004	1	0.0833333	26	2	0	50	humanities	0	3	1	2	1	0.00694444		1	1
2004	0	0	4	2	0	8	humanities	0	0	0	0	1	0		0	0
2004	1	1	0	1	0	22	humanities	0	0	0	0	0	1		0	1
2004	10	0.5	6	2	0	28	social science	1	14	3	11	0	0.25	0.5	1	100
2004	16	0.761905	10	2	4	30	social science	0	52	37	15	0	0.580499	0.238095	0	256
2004	0	0	48	1	5	67	social science	0	0	0	2	1	0	1	1	0
2004	0	0	29	1	5	42	social science	0	0	0	1	1	0	1	1	0
2004	2	0.0571429	31	1	3	82	social science	0	58	9	49	1	0.00326531	0.942857	1	4
2004	3	0.115385	19	3	5	32	social science	1	10	6	4	1	0.0133136	0.884615	0	9
2004	1	0.0833333	13	3	5	40	social science	1	73	26	47	1	0.00694444	0.833333	1	1
2004	0	0	6	1	4	26	social science	1	4	3	1	1	0	0.666667	0	0
2004	12	0.571429	18	2	4	36	social science	0	19	4	15	0	0.326531	0.0952381	1	144
2004	1	0.0588235	11	3	0	34	social science	1	0	0	1	1	0.00346021	0.882353	1	1
2004	6	0.428571	14	3	6	39	social science	1	7	1	6	1	0.183673	0.571429	1	36
2004	4	0.190476	17	2	6	29	social science	1	16	6	10	1	0.0362812	0.809524	1	16
2004	10	0.526316	7	2	0	24	social science	0	0	5	0	0	0.277008	0.157895	0	100
2004	1	0.0769231	18	1	0	38	social science	0	0	0	2	1	0.00591716	0.923077	1	1
2004	8	0.333333	7	3	6	34	social science	1	4	3	1	1	0.111111	0.208333	0	64
2004	0	0	13	3	4	30	humanities	0	0	2	0	1	0	0	0	0
2004	0	0	19	1	6	43	social science	0	20	1	19	1	0	0.916667	1	0
2004	0	0	18	2	6	66	social science	0	43	6	37	1	0	0.815789	1	0
2004	0	0	20	1	0	31	social science	0	22	3	19	1	0	1	1	0
2004	0	0	11	2	5	54	social science	0	36	3	33	1	0	1	1	0
2004	2	0.153846	13	3	5	34	social science	1	0	0	14	1	0.0236686	0.846154	1	4
2004	0	0	7	3	3	20	social science	1	13	2	11	1	0	1	1	0
2004	9	0.5625	13	5	6	40	social science	0	21	15	6	0	0.316406	0.4375	0	81
2004	12	0.461538	10	3	0	47	social science	0	0	0	0	1	0.213018	0.192308	0	144
2004	1	0.0294118	30	1	0	81	social science	0	85	20	65	1	0.000865052	0.588235	1	1
2004	0	0	16	2	0	19	social science	0	7	1	6	1	0	1	1	0
2004	2	0.0833333	8	1	0	35	social science	0	9	4	5	1	0.00694444	0.791667	1	4
2004	0	0	18	2	5	88	social science	0	10	2	8	1	0	1	1	0
2004	0	0	17	3	0	29	social science	1	18	2	16	1	0	0.615385	1	0
2004	0	0	29	1	0	43	social science	0	13	2	11	1	0	0.7	1	0
2004	0	0	20	2	0	64	social science	0	14	4	10	1	0	0.375	1	0
2004	0	0	22	1	0	33	social science	0	0	0	0	1	0	0.5	0	0
2004	0	0	16	2	0	19	social science	0	0	0	3	1	0	0	1	0
2004	0	0	13	2	3	9	social science	1	14	9	5	1	0	0	0	0
2004	1	0.25	21	3	7	12	social science	0	21	6	15	1	0.0625	0.75	1	1
2004	0	0	18	3	4	94	social science	0	13	2	11	1	0	0.866667	1	0
2004	12	0.461538	28	2	0	44	social science	1	35	29	6	1	0.213018	0.538462	0	144
2004	2	0.04	22	1	0	61	social science	0	9	2	7	1	0.0016	0.4	1	4
2004	8	0.8	14	2	6	28	social science	0	4	2	2	0	0.64	0.2	0	64
2004	0	0	31	1	0	136	humanities	0	0	0	1	1	0	1	1	0
2004	13	0.216667	27	3	9	100	social science	1	61	30	31	1	0.0469444	0.266667	1	169
2004	0	0	10	12	0	79	social science	1	10	1	9	1	0	1	1	0
2004	1	0.25	12	1	0	25	social science	0	0	1	0	1	0.0625	0.5	0	1
2004	8	0.444444	11	2	5	29	social science	0	6	4	2	1	0.197531	0.555556	0	64
2004	4	0.148148	21	2	4	40	social science	0	16	7	9	1	0.0219479	0.703704	1	16
2004	0	0	23	1	3	16	social science	0	0	0	2	1	0	1	1	0
2004	1	0.0217391	20	2	6	80	social science	1	86	17	69	1	0.00047259	0.869565	1	1
2004	0	0	11	2	0	18	social science	1	0	0	0	1	0	1	0	0
2004	0	0	16	2	0	51	social science	1	0	0	1	1	0	1	1	0
2004	5	0.384615	16	4	4	33	social science	0	6	4	2	1	0.147929	0.538462	0	25
2004	8	0.8	6	3	5	27	social science	1	3	2	1	0	0.64	0.2	0	64
2004	0	0	8	1	5	48	social science	0	9	2	7	1	0	1	1	0
2004	1	0.111111	23	4	0	38	social science	1	2	1	1	1	0.0123457	0.888889	0	1
2004	0	0	22	5	5	49	social science	1	0	0	5	1	0	0.914286	1	0
2004	4	0.129032	20	4	5	47	social science	1	34	3	31	1	0.0166493	0.709677	1	16
2004	0	0	3	1	0	6	social science	1	0	0	0	1	0	1	0	0
2004	5	0.135135	12	2	0	68	social science	1	66	5	61	1	0.0182615	0.810811	1	25
2004	0	0	10	6	0	27	social science	1	30	3	27	1	0	0.809524	1	0
2004	1	0.1	10	3	0	18	social science	1	33	16	17	1	0.01	0.9	1	1
2004	2	0.222222	16	1	4	17	social science	0	0	0	0	1	0.0493827	0.777778	0	4
2004	2	0.133333	23	3	3	33	social science	1	0	0	8	1	0.0177778	0.733333	1	4
2004	0	0	9	2	4	18	social science	0	0	0	2	1	0	0	1	0
2004	0	0	19	2	4	51	social science	1	51	10	41	1	0	0.972222	1	0
2004	0	0	25	1	0	24	social science	0	0	0	1	1	0	1	1	0
2004	0	0	21	1	6	44	humanities	0	7	2	5	1	0		1	0
2004	0	0	21	2	5	28	humanities	0	0	0	2	1	0		1	0
2004	0	0	19	2	5	13	humanities	1	0	0	7	1	0		1	0
2004	0	0	17	2	6	31	humanities	1	0	0	3	1	0		1	0
2004	1	0.166667	26	2	8	32	humanities	0	0	0	4	1	0.0277778		1	1
2004	2	0.105263	15	1	4	36	social science	0	6	5	1	1	0.0110803	0.736842	0	4
2004	1	0.05	9	1	3	28	social science	0	7	2	5	1	0.0025	0.9	1	1
2004	2	0.153846	13	3	4	27	social science	1	0	0	1	1	0.0236686	0.769231	1	4
2004	0	0	30	3	0	39	social science	0	0	0	0	1	0	1	0	0
2004	0	0	22	2	6	19	social science	1	0	0	8	1	0	1	1	0
2004	0	0	8	3	6	11	social science	1	0	0	1	1	0	0.285714	1	0
2004	2	0.0833333	16	3	5	36	social science	1	18	10	8	1	0.00694444	0.916667	0	4
2004	1	0.1	19	1	0	49	humanities	0	0	0	10	1	0.01		1	1
2004	0	0	12	5	6	76	social science	1	87	8	79	1	0	0.684211	1	0
2004	0	0	14	2	4	65	social science	1	81	17	64	1	0	0.575758	1	0
2004	0	0	13	5	7	90	social science	1	169	22	147	1	0	0.857143	1	0
2004	0	0	14	2	6	38	social science	1	14	1	13	1	0	0.333333	1	0
2004	0	0	10	3	4	54	social science	1	81	11	70	1	0	0.52381	1	0
2004	0	0	11	3	3	43	social science	1	0	0	19	1	0	0.65	1	0
2004	0	0	9	3	5	56	social science	1	89	15	74	1	0	0.897436	1	0
2004	0	0	13	3	3	41	social science	1	125	32	93	1	0	0.777778	1	0
2004	3	0.075	24	15	0	55	social science	1	97	7	90	1	0.005625	0.525	1	9
2004	8	0.8	5	3	5	15	social science	1	0	1	0	0	0.64	0.2	0	64
2004	22	0.578947	17	2	4	62	social science	1	20	6	14	0	0.33518	0.421053	1	484
2004	1	0.125	21	2	10	51	social science	1	67	9	58	1	0.015625	0.875	1	1
2004	13	0.52	7	4	5	37	social science	0	6	4	2	0	0.2704	0.36	0	169
2004	0	0	13	1	4	47	social science	0	0	0	0	1	0	0.875	0	0
2004	2	0.0606061	11	2	0	45	social science	1	42	3	39	1	0.00367309	0.30303	1	4
2004	1	0.166667	8	2	3	19	social science	0	26	12	14	1	0.0277778	0.833333	1	1
2004	0	0	12	1	6	33	social science	0	0	0	4	1	0	1	1	0
2004	4	0.222222	11	2	4	37	social science	0	26	17	9	1	0.0493827	0.777778	0	16
2004	0	0	25	1	0	13	humanities	0	0	0	1	1	0	1	1	0
2004	0	0	14	1	6	26	social science	0	7	5	2	1	0	0.8	0	0
2004	6	0.4	18	3	5	21	social science	1	16	10	6	1	0.16	0.133333	0	36
2004	0	0	19	1	0	21	social science	1	5	1	4	1	0	1	1	0
2004	0	0	15	1	0	9	social science	0	4	1	3	1	0	1	1	0
2004	4	0.333333	28	2	0	53	social science	0	11	5	6	1	0.111111	0.25	1	16
2004	0	0	9	2	0	24	social science	1	0	0	4	1	0	0.863636	1	0
2004	5	0.333333	12	4	0	23	social science	1	121	67	54	1	0.111111	0.6	0	25
2004	21	0.875	10	3	0	27	social science	1	19	15	4	0	0.765625	0	0	441
2004	7	0.241379	18	1	6	43	social science	0	36	7	29	1	0.058264	0.137931	1	49
2004	13	0.288889	33	5	4	79	social science	0	115	68	47	1	0.0834568	0.666667	0	169
2004	10	0.434783	20	1	0	37	social science	0	0	0	2	1	0.189036	0.565217	1	100
2004	0	0	18	2	3	8	social science	1	3	2	1	1	0	1	0	0
2004	0	0	32	2	4	17	social science	1	10	1	9	1	0	0.8	1	0
2004	0	0	13	1	5	9	social science	0	14	4	10	1	0	1	1	0
2004	20	0.487805	9	8	3	60	social science	1	0	0	0	1	0.237954	0.512195	0	400
2004	0	0	26	1	0	95	social science	0	0	0	3	1	0	0.971429	1	0
2004	5	0.142857	13	3	4	97	social science	0	8	4	4	1	0.0204082	0.771429	0	25
2004	0	0	24	2	0	14	social science	1	0	0	8	1	0	0.833333	1	0
2004	0	0	19	3	3	79	social science	0	48	6	42	1	0	0.977778	1	0
2004	0	0	17	1	5	53	social science	0	0	0	1	1	0	0.655172	1	0
2004	0	0	21	1	0	67	social science	0	0	0	0	1	0	0.888889	0	0
2004	0	0	31	2	10	37	social science	0	0	0	7	1	0	0.769231	1	0
2004	0	0	19	3	3	32	social science	0	11	2	9	1	0	1	1	0
2004	0	0	25	3	5	19	social science	1	0	0	29	1	0	0.6	1	0
2004	0	0	32	3	4	85	social science	1	83	10	73	1	0	0.453125	1	0
2004	0	0	29	3	0	33	social science	0	3	1	2	1	0	0.391304	1	0
2004	0	0	14	2	0	6	social science	0	0	0	3	1	0	0.5	1	0
2004	0	0	15	3	0	38	social science	1	36	3	33	1	0	0.7	1	0
2004	2	0.125	12	3	0	31	social science	0	0	0	5	1	0.015625	0.875	1	4
2004	0	0	25	2	0	29	social science	1	0	0	8	1	0	0.869565	1	0
2004	1	0.0833333	31	2	0	30	social science	1	7	1	6	1	0.00694444	0.833333	1	1
2004	0	0	29	3	0	36	social science	0	11	2	9	1	0	1	1	0
2004	13	0.928571	15	3	0	21	social science	0	11	5	6	0	0.862245	0.0714286	1	169
2004	2	0.153846	6	3	3	15	social science	0	47	30	17	1	0.0236686	0.846154	0	4
2004	0	0	17	3	0	71	social science	1	15	3	12	1	0	1	1	0
2004	1	0.0277778	28	2	0	54	social science	0	15	3	12	1	0.000771605	0.916667	1	1
2004	0	0	23	2	0	31	social science	0	10	2	8	1	0	1	1	0
2004	0	0	4	1	0	9	social science	0	0	0	0	1	0	1	0	0
2004	0	0	16	5	0	12	social science	0	34	4	30	1	0	1	1	0
2004	0	0	15	4	0	10	social science	0	27	4	23	1	0	1	1	0
2004	0	0	19	3	0	19	social science	1	22	4	18	1	0	1	1	0
2004	1	0.0666667	13	2	0	23	social science	0	0	0	2	1	0.00444444	0.133333	1	1
2004	18	0.486486	17	1	0	50	social science	0	62	15	47	1	0.236669	0.486486	1	324
2004	2	0.0869565	21	2	3	44	social science	0	9	5	4	1	0.00756144	0.869565	0	4
2004	14	0.466667	12	7	6	48	social science	1	18	10	8	1	0.217778	0.166667	0	196
2004	0	0	19	1	7	27	social science	0	3	1	2	1	0	0.875	1	0
2004	0	0	17	2	0	53	social science	0	7	2	5	1	0	0.333333	1	0
2004	0	0	11	2	3	41	social science	0	79	23	56	1	0	0.833333	1	0
2004	0	0	6	3	4	15	social science	1	21	4	17	1	0	1	1	0
2004	32	0.842105	9	6	5	41	social science	0	13	10	3	0	0.709141	0.0789474	0	1024
2004	0	0	22	2	6	42	social science	1	24	1	23	1	0	0.733333	1	0
2004	2	0.03125	79	2	0	142	social science	0	114	7	107	1	0.000976563	0.875	1	4
2004	12	0.27907	8	3	0	66	social science	0	23	13	10	1	0.0778799	0.139535	0	144
2004	42	0.893617	10	4	0	51	social science	1	14	12	2	0	0.798551	0.106383	0	1764
2004	2	1	13	1	5	20	social science	0	28	11	17	0	1	0	1	4
2004	1	0.037037	23	5	0	40	social science	1	21	5	16	1	0.00137174	0.481481	1	1
2004	0	0	19	2	0	66	social science	1	26	2	24	1	0	0.170732	1	0
2004	0	0	21	2	4	32	social science	0	0	0	1	1	0	0	1	0
2004	0	0	10	2	4	8	social science	0	0	0	1	1	0	1	1	0
2004	0	0	12	2	0	13	social science	1	0	0	1	1	0	1	1	0
2004	0	0	15	1	0	44	social science	0	0	0	0	1	0	1	0	0
2004	1	0.0833333	15	2	0	51	social science	1	0	0	1	1	0.00694444	0.916667	1	1
2004	0	0	11	1	0	17	social science	0	10	3	7	1	0	1	1	0
2004	0	0	13	2	0	35	social science	1	49	5	44	1	0	0.684211	1	0
2004	0	0	20	2	4	13	social science	0	97	23	74	1	0	0.75	1	0
2004	1	0.0555556	18	3	3	31	social science	1	0	0	12	1	0.00308642	0.777778	1	1
2004	0	0	19	3	3	37	social science	1	22	8	14	1	0	0.9375	1	0
2004	0	0	12	2	4	14	social science	1	44	22	22	1	0	1	0	0
2004	0	0	18	3	4	28	social science	1	24	2	22	1	0	0.5	1	0
2004	1	0.111111	10	2	4	23	social science	1	21	7	14	1	0.0123457	0.444444	1	1
2004	2	0.2	9	6	2	16	social science	1	12	7	5	1	0.04	0.5	0	4
2004	0	0	14	3	4	35	social science	1	22	9	13	1	0	0.909091	1	0
2004	1	0.0588235	20	3	3	27	social science	1	9	3	6	1	0.00346021	0.941176	1	1
2004	0	0	14	1	4	28	social science	0	0	0	0	1	0	0	0	0
2004	0	0	9	3	0	21	social science	0	0	0	8	1	0	0.9375	1	0
2004	0	0	10	4	0	36	social science	0	0	0	22	1	0	1	1	0
2004	2	0.142857	16	2	0	28	social science	0	7	2	5	1	0.0204082	0.785714	1	4
2004	0	0	27	3	0	22	social science	0	40	10	30	1	0	1	1	0
2004	0	0	29	3	0	24	social science	1	8	3	5	1	0	1	1	0
2004	1	0.04	38	3	6	43	social science	1	0	0	9	1	0.0016	0.64	1	1
2004	4	1	5	2	3	11	social science	0	0	0	0	0	1	0	0	16
2004	4	0.8	6	1	5	7	social science	0	0	0	0	0	0.64	0.2	0	16
2004	0	0	3	1	0	2	humanities	0	0	0	0	1	0		0	0
2004	0	0	1	1	0	1	humanities	0	0	0	0	1	0		0	0
2004	1	0.166667	20	1	5	32	humanities	0	4	3	1	1	0.0277778		0	1
2004	0	0	1	1	0	1	humanities	0	0	0	0	1	0		0	0
2004	3	0.166667	23	1	4	78	humanities	0	6	1	5	1	0.0277778		1	9
2004	0	0	20	3	7	33	social science	0	31	17	14	1	0	1	0	0
2004	3	0.111111	11	6	5	39	social science	1	42	14	28	1	0.0123457	0.888889	1	9
2004	10	0.285714	22	3	6	69	social science	1	97	68	29	1	0.0816327	0.685714	0	100
2004	0	0	12	2	0	18	social science	0	16	6	10	1	0	1	1	0
2004	0	0	12	2	0	36	social science	0	0	0	2	1	0	1	1	0
2004	0	0	11	4	0	53	social science	1	4	2	2	1	0	0.925926	0	0
2004	15	0.789474	24	2	0	51	social science	0	5	2	3	0	0.623269	0.157895	1	225
2004	7	0.318182	20	2	0	40	social science	0	0	0	0	1	0.10124	0.636364	0	49
2004	9	0.321429	26	3	2	58	social science	1	56	19	37	1	0.103316	0.642857	1	81
2004	5	0.555556	21	4	5	24	social science	0	16	11	5	0	0.308642	0.444444	0	25
2004	1	0.5	13	3	6	7	social science	1	0	0	0	0	0.25	0	0	1
2004	0	0	24	2	6	43	social science	1	0	0	2	1	0	0.3	1	0
2004	0	0	17	3	4	51	social science	1	0	0	6	1	0	0.857143	1	0
2004	0	0	4	3	4	9	social science	1	3	1	2	1	0	1	1	0
2004	0	0	8	3	4	13	social science	1	0	0	4	1	0	1	1	0
2004	0	0	20	2	0	46	social science	1	19	3	16	1	0	0.666667	1	0
2004	28	0.903226	15	3	7	41	social science	1	0	0	0	0	0.815817	0	0	784
2004	1	0.0344828	27	3	0	46	social science	1	22	6	16	1	0.00118906	0.896552	1	1
2004	0	0	19	1	4	24	humanities	0	0	0	0	1	0		0	0
2004	0	0	61	1	5	8	humanities	0	0	0	0	1	0		0	0
2004	0	0	17	3	0	29	social science	0	0	0	8	1	0	0.9	1	0
2004	0	0	22	2	0	43	social science	1	9	1	8	1	0	1	1	0
2004	0	0	16	1	0	59	social science	0	0	0	1	1	0	0.941176	1	0
2004	0	0	23	1	0	53	social science	0	0	0	1	1	0	1	1	0
2004	0	0	25	2	4	16	social science	1	29	8	21	1	0	0.125	1	0
2004	2	0.0833333	29	1	3	33	social science	0	0	0	17	1	0.00694444	0.333333	1	4
2004	1	0.0833333	12	3	5	34	social science	1	19	1	18	1	0.00694444	0.5	1	1
2004	0	0	21	5	5	44	social science	1	0	0	17	1	0	0.625	1	0
2004	9	0.409091	15	2	4	30	social science	1	11	10	1	1	0.167355	0.545455	0	81
2004	6	1	10	2	3	11	social science	1	0	3	0	0	1	0	0	36
2004	3	0.375	6	2	3	15	social science	1	0	0	1	1	0.140625	0.5	1	9
2004	5	0.128205	16	4	0	46	social science	1	144	40	104	1	0.0164366	0.871795	1	25
2004	1	0.05	10	3	0	31	social science	1	19	2	17	1	0.0025	0.95	1	1
2004	0	0	34	4	3	36	social science	1	11	2	9	1	0	0.181818	1	0
2004	9	0.75	12	3	5	29	social science	0	6	5	1	0	0.5625	0.25	0	81
2004	1	0.030303	15	3	5	49	social science	0	71	8	63	1	0.000918274	0.757576	1	1
2004	0	0	21	4	0	43	social science	1	25	3	22	1	0	0.885714	1	0
2004	1	0.027027	15	2	0	44	social science	0	62	6	56	1	0.00073046	0.864865	1	1
2004	1	0.0196078	13	3	0	73	social science	1	27	10	17	1	0.000384468	0.921569	1	1
2004	0	0	17	1	5	18	social science	1	21	15	6	1	0	0.8	0	0
2004	2	0.0833333	20	1	5	30	social science	1	0	0	4	1	0.00694444	0.916667	1	4
2004	7	0.466667	6	3	4	22	social science	1	35	18	17	1	0.217778	0.533333	0	49
2004	2	0.2	12	3	6	36	social science	0	13	10	3	1	0.04	0.4	0	4
2004	1	0.0344828	11	1	5	54	social science	0	4	3	1	1	0.00118906	0.517241	0	1
2004	2	0.0645161	24	2	7	61	social science	0	0	0	2	1	0.00416233	0.354839	1	4
2004	13	1	7	3	0	15	social science	0	0	1	0	0	1	0	0	169
2004	0	0	8	4	6	21	social science	0	3	2	1	1	0	0.9375	0	0
2004	0	0	13	1	0	19	social science	0	0	0	2	1	0	0.9	1	0
2004	1	0.047619	15	3	3	35	social science	1	31	13	18	1	0.00226757	0.952381	1	1
2004	1	0.25	43	1	5	47	social science	0	15	11	4	1	0.0625	0.75	0	1
2004	3	0.3	32	2	5	32	social science	1	47	22	25	1	0.09	0.7	1	9
2004	1	0.333333	14	1	0	19	humanities	0	0	0	0	1	0.111111		0	1
2004	0	0	12	2	0	37	social science	1	12	3	9	1	0	0.961538	1	0
2004	0	0	20	1	5	60	social science	0	0	0	0	1	0	1	0	0
2004	12	1	5	3	0	14	social science	1	6	5	1	0	1	0	0	144
2004	9	0.5625	8	5	4	22	social science	1	24	19	5	0	0.316406	0.4375	0	81
2004	0	0	12	5	5	83	social science	1	15	1	14	1	0	1	1	0
2004	4	0.0754717	17	1	0	114	social science	0	0	0	27	1	0.00569598	0.54717	1	16
2004	1	0.025641	9	1	0	52	social science	0	0	0	3	1	0.000657462	0.769231	1	1
2004	2	0.0571429	16	2	6	77	social science	1	8	1	7	1	0.00326531	0.428571	1	4
2004	1	0.0416667	15	2	4	38	social science	0	7	2	5	1	0.00173611	0.916667	1	1
2004	1	0.0555556	31	2	4	93	social science	0	0	1	0	1	0.00308642	0.944444	0	1
2004	25	0.757576	15	1	0	63	social science	0	15	6	9	0	0.573921	0.242424	1	625
2004	13	0.541667	29	1	0	76	social science	0	6	4	2	0	0.293403	0.375	0	169
2004	0	0	17	5	0	73	social science	1	77	6	71	1	0	0.962963	1	0
2004	0	0	15	1	3	15	social science	0	0	0	20	1	0	0.5	1	0
2004	4	0.210526	16	3	0	29	social science	1	12	4	8	1	0.0443213	0.526316	1	16
2004	9	0.36	20	1	0	39	social science	0	23	11	12	1	0.1296	0.64	1	81
2004	8	0.533333	15	1	0	19	social science	0	6	1	5	0	0.284444	0.4	1	64
2004	7	0.291667	21	2	0	32	social science	0	35	12	23	1	0.0850694	0.666667	1	49
2004	0	0	9	3	0	11	social science	0	0	0	10	1	0	1	1	0
2004	0	0	11	4	0	9	social science	0	7	1	6	1	0	1	1	0
2004	0	0	13	8	0	9	social science	0	17	1	16	1	0	1	1	0
2004	0	0	11	3	0	10	social science	1	0	0	10	1	0	1	1	0
2004	4	0.333333	10	2	0	19	social science	1	30	9	21	1	0.111111	0.666667	1	16
2004	4	1	13	3	0	12	social science	0	0	0	3	0	1	0	1	16
2004	3	0.125	25	2	0	38	social science	0	0	0	2	1	0.015625	0.833333	1	9
2004	0	0	20	3	3	50	social science	1	7	1	6	1	0	0.961538	1	0
2004	4	0.166667	15	2	0	54	social science	0	0	0	2	1	0.0277778	0.75	1	16
2004	0	0	10	5	0	26	social science	0	0	0	3	1	0	0.571429	1	0
2004	0	0	10	3	0	33	humanities	0	0	0	0	1	0		0	0
2004	3	0.428571	16	3	6	29	social science	0	19	10	9	1	0.183673	0.571429	0	9
2004	1	0.125	34	1	4	36	humanities	0	0	0	0	1	0.015625		0	1
2004	0	0	43	1	0	53	social science	0	0	0	0	1	0	0.1	0	0
2004	11	0.578947	22	4	0	42	social science	1	2	1	1	0	0.33518	0.421053	0	121
2004	3	0.2	21	3	0	71	social science	1	25	6	19	1	0.04	0.733333	1	9
2004	5	0.833333	15	3	0	29	social science	0	17	12	5	0	0.694444	0.166667	0	25
2004	9	0.45	16	6	5	32	social science	1	16	2	14	1	0.2025	0.4	1	81
2004	0	0	26	3	0	20	social science	1	39	4	35	1	0	1	1	0
2003	61	0.802632	42	4	0	181	social science	1	15	10	5	0	0.644217	0.184211	0	3721
2003	0	0	12	1	0	41	social science	0	0	0	10	1	0	1	1	0
2003	1	0.2	6	1	4	23	social science	0	0	0	0	1	0.04	0	0	1
2003	8	0.571429	7	2	0	25	social science	0	2	1	1	0	0.326531	0.428571	0	64
2003	9	0.529412	13	4	0	23	social science	0	23	8	15	0	0.280277	0.294118	1	81
2003	1	1	3	4	0	4	social science	1	2	1	1	0	1	0	0	1
2003	4	0.5	3	9	0	18	social science	1	4	2	2	0	0.25	0.5	0	16
2003	6	0.26087	9	2	5	41	social science	1	4	1	3	1	0.0680529	0.521739	1	36
2003	1	0.0769231	25	1	0	70	social science	0	0	0	0	1	0.00591716	0.384615	0	1
2003	0	0	35	2	0	35	social science	0	0	0	0	1	0	0.6	0	0
2003	2	0.08	16	2	3	32	social science	1	16	1	15	1	0.0064	0.88	1	4
2003	30	0.909091	13	4	5	40	social science	0	0	1	0	0	0.826446	0	0	900
2003	1	0.5	6	2	6	9	social science	0	0	0	0	0	0.25	0	0	1
2003	0	0	25	2	0	17	social science	1	8	1	7	1	0	0.166667	1	0
2003	0	0	23	1	0	36	social science	0	0	0	11	1	0	0.8	1	0
2003	6	0.4	13	1	4	47	social science	0	14	6	8	1	0.16	0.6	1	36
2003	2	0.2	21	3	5	14	social science	0	44	28	16	1	0.04	0.8	0	4
2003	4	0.5	20	1	0	29	social science	0	15	2	13	0	0.25	0.5	1	16
2003	0	0	26	2	0	51	social science	0	0	0	11	1	0	1	1	0
2003	6	0.214286	25	2	0	34	social science	1	2	1	1	1	0.0459184	0.785714	0	36
2003	0	0	6	1	3	7	social science	0	0	0	8	1	0	1	1	0
2003	0	0	10	2	4	33	social science	0	0	0	26	1	0	0.25	1	0
2003	0	0	11	2	5	27	social science	0	7	2	5	1	0	0.875	1	0
2003	4	0.166667	14	5	0	44	social science	1	39	10	29	1	0.0277778	0.0833333	1	16
2003	13	0.8125	6	2	5	32	social science	1	9	3	6	0	0.660156	0.125	1	169
2003	0	0	18	3	4	51	social science	1	25	5	20	1	0	1	1	0
2003	7	1	19	2	8	24	social science	0	0	0	0	0	1	0	0	49
2003	0	0	12	1	3	39	social science	0	0	0	1	1	0	1	1	0
2003	2	0.0714286	11	1	0	42	social science	0	9	3	6	1	0.00510204	0.357143	1	4
2003	7	0.179487	32	2	0	71	social science	1	2	1	1	1	0.0322156	0.538462	0	49
2003	0	0	20	1	0	10	social science	0	0	0	0	1	0	1	0	0
2003	0	0	16	2	0	9	social science	1	0	0	0	1	0	1	0	0
2003	1	0.0833333	18	1	3	19	social science	1	0	0	3	1	0.00694444	0.833333	1	1
2003	1	0.0666667	14	2	5	45	social science	1	0	0	6	1	0.00444444	0.733333	1	1
2003	1	1	13	1	7	19	social science	0	15	4	11	0	1	0	1	1
2003	2	0.0444444	16	1	7	88	social science	0	0	0	1	1	0.00197531	0.955556	1	4
2003	0	0	24	2	0	44	social science	1	0	0	1	1	0	0.863636	1	0
2003	0	0	16	1	0	51	social science	0	32	3	29	1	0	0.447368	1	0
2003	0	0	9	3	0	26	social science	1	11	1	10	1	0	0.727273	1	0
2003	0	0	35	6	0	100	social science	1	62	8	54	1	0	0	1	0
2003	2	0.0833333	34	2	4	35	social science	1	0	0	3	1	0.00694444	0.916667	1	4
2003	0	0	22	2	5	35	social science	1	6	3	3	1	0	0.470588	0	0
2003	0	0	25	2	5	23	social science	1	0	0	8	1	0	1	1	0
2003	17	0.894737	16	2	5	27	social science	1	54	45	9	0	0.800554	0.0526316	0	289
2003	2	0.0769231	9	5	0	38	social science	1	83	18	65	1	0.00591716	0.807692	1	4
2003	7	0.241379	21	2	3	81	social science	1	5	2	3	1	0.058264	0.586207	1	49
2003	2	0.0689655	16	4	0	50	social science	0	8	1	7	1	0.00475624	0.448276	1	4
2003	0	0	9	4	0	62	social science	1	109	18	91	1	0	0.0789474	1	0
2003	0	0	31	2	0	30	social science	1	11	1	10	1	0	0.588235	1	0
2003	0	0	17	2	0	18	social science	0	0	0	1	1	0	0.214286	1	0
2003	0	0	8	1	3	20	social science	0	0	0	0	1	0	1	0	0
2003	0	0	12	2	0	15	social science	0	0	0	5	1	0	1	1	0
2003	6	0.139535	29	3	0	115	social science	1	31	4	27	1	0.01947	0.744186	1	36
2003	0	0	23	2	0	111	social science	0	33	4	29	1	0	0.662338	1	0
2003	1	0.025	32	8	0	90	social science	1	54	8	46	1	0.000625	0.975	1	1
2003	0	0	14	8	0	89	social science	1	21	2	19	1	0	0.960784	1	0
2003	1	0.0555556	28	2	0	48	social science	1	0	0	5	1	0.00308642	0.777778	1	1
2003	2	0.0588235	17	5	3	45	social science	1	10	4	6	1	0.00346021	0.941176	1	4
2003	2	0.133333	7	6	4	29	social science	0	0	0	4	1	0.0177778	0.6	1	4
2003	2	0.0666667	10	2	0	41	social science	1	0	0	12	1	0.00444444	0.766667	1	4
2003	0	0	21	1	0	13	social science	0	0	0	0	1	0	1	0	0
2003	1	0.0909091	10	1	4	33	social science	0	22	3	19	1	0.00826446	0.909091	1	1
2003	0	0	14	3	8	39	social science	1	10	5	5	1	0	0.956522	0	0
2003	15	0.714286	10	2	5	29	social science	0	57	33	24	0	0.510204	0.238095	0	225
2003	3	0.2	11	3	4	22	social science	1	16	9	7	1	0.04	0.8	0	9
2003	0	0	10	1	0	22	social science	0	0	0	0	1	0	1	0	0
2003	0	0	13	5	4	56	social science	1	43	6	37	1	0	0.965517	1	0
2003	1	0.166667	13	1	0	21	humanities	0	0	0	3	1	0.0277778	0	1	1
2003	1	0.125	17	1	4	25	humanities	0	3	1	2	1	0.015625	0	1	1
2003	3	0.125	9	3	0	38	social science	1	5	1	4	1	0.015625	0.375	1	9
2003	3	0.1875	10	1	6	34	social science	0	22	2	20	1	0.0351562	0.75	1	9
2003	1	0.0909091	11	1	0	22	social science	0	0	0	0	1	0.00826446	0.818182	0	1
2003	4	0.444444	8	3	0	15	social science	1	0	0	0	1	0.197531	0.444444	0	16
2003	1	0.0416667	7	3	0	29	social science	1	27	6	21	1	0.00173611	0.958333	1	1
2003	5	0.384615	7	4	0	23	social science	0	22	13	9	1	0.147929	0.230769	0	25
2003	2	0.0740741	22	2	4	43	social science	0	0	0	2	1	0.00548697	0.703704	1	4
2003	0	0	25	1	0	34	humanities	0	0	0	19	1	0		1	0
2003	0	0	5	2	0	13	social science	1	0	0	5	1	0	1	1	0
2003	0	0	7	2	0	16	social science	0	0	0	3	1	0	0.928571	1	0
2003	0	0	2	2	0	6	social science	0	38	18	20	1	0	1	1	0
2003	19	0.791667	9	4	6	31	social science	1	4	2	2	0	0.626736	0.166667	0	361
2003	0	0	16	1	0	36	social science	0	9	1	8	1	0	0.75	1	0
2003	0	0	8	1	0	2	social science	0	0	0	0	1	0	1	0	0
2003	10	0.833333	7	3	5	14	social science	0	0	1	0	0	0.694444	0.166667	0	100
2003	8	0.421053	22	3	9	47	social science	1	8	6	2	1	0.177285	0.473684	0	64
2003	0	0	21	2	5	41	social science	0	0	0	2	1	0	0.875	1	0
2003	0	0	24	1	0	29	social science	0	17	2	15	1	0	1	1	0
2003	0	0	23	1	0	9	humanities	0	0	0	1	1	0	1	1	0
2003	1	0.0833333	15	1	0	35	social science	0	0	0	5	1	0.00694444	0.833333	1	1
2003	1	0.0588235	14	1	4	32	social science	1	85	61	24	1	0.00346021	0.941176	0	1
2003	13	0.764706	20	2	0	33	social science	0	16	12	4	0	0.584775	0.117647	0	169
2003	13	0.40625	19	3	5	51	social science	1	0	1	0	1	0.165039	0.3125	0	169
2003	7	0.304348	12	2	9	45	social science	0	9	4	5	1	0.0926276	0.608696	1	49
2003	6	0.461538	30	2	0	62	social science	1	0	1	0	1	0.213018	0.461538	0	36
2003	0	0	18	1	0	32	social science	0	0	0	10	1	0	0.73913	1	0
2003	18	0.818182	17	1	0	52	social science	0	0	0	2	0	0.669421	0.136364	1	324
2003	0	0	11	1	0	68	social science	0	0	0	6	1	0	1	1	0
2003	2	0.0571429	18	5	5	51	social science	1	25	1	24	1	0.00326531	0.885714	1	4
2003	14	0.341463	25	5	5	53	social science	1	102	60	42	1	0.116597	0.560976	0	196
2003	0	0	40	2	6	72	social science	1	142	19	123	1	0	0.282609	1	0
2003	1	0.0140845	26	1	0	127	social science	0	0	0	6	1	0.000198373	0.760563	1	1
2003	0	0	17	1	4	26	social science	1	0	0	4	1	0	1	1	0
2003	0	0	24	2	3	47	social science	1	0	0	56	1	0	1	1	0
2003	0	0	32	3	4	48	social science	1	0	0	11	1	0	0.96	1	0
2003	1	0.0416667	28	1	2	65	social science	0	0	0	3	1	0.00173611	0.958333	1	1
2003	3	1	8	5	4	14	social science	0	19	13	6	0	1	0	0	9
2003	2	0.0571429	31	2	5	83	social science	0	0	0	0	1	0.00326531	0.771429	0	4
2003	16	1	23	8	4	43	social science	0	13	12	1	0	1	0	0	256
2003	0	0	10	1	0	22	social science	0	0	0	0	1	0	0.875	0	0
2003	14	0.341463	10	4	4	54	social science	0	8	1	7	1	0.116597	0.658537	1	196
2003	13	0.619048	12	6	5	33	social science	1	10	8	2	0	0.38322	0.380952	0	169
2003	0	0	13	2	0	22	social science	1	0	1	0	1	0	0.666667	0	0
2003	0	0	7	2	3	24	social science	1	11	8	3	1	0	1	0	0
2003	1	0.142857	4	2	0	9	social science	1	0	0	1	1	0.0204082	0.857143	1	1
2003	0	0	31	1	0	27	social science	0	63	33	30	1	0	1	0	0
2003	3	0.032967	19	2	0	137	social science	1	0	0	8	1	0.00108683	0.505495	1	9
2003	2	0.142857	8	6	0	25	social science	1	16	4	12	1	0.0204082	0.785714	1	4
2003	20	0.625	13	6	5	54	social science	1	16	10	6	0	0.390625	0.375	0	400
2003	3	0.333333	14	2	4	37	social science	0	24	13	11	1	0.111111	0.666667	0	9
2003	0	0	12	1	0	23	social science	0	42	23	19	1	0	0.7	0	0
2003	0	0	18	1	4	44	social science	0	0	0	2	1	0	0.75	1	0
2003	0	0	23	2	0	32	social science	0	11	1	10	1	0	0.4	1	0
2003	0	0	9	2	3	15	social science	1	0	0	8	1	0	1	1	0
2003	2	0.4	16	9	0	16	social science	1	9	7	2	1	0.16	0.6	0	4
2003	0	0	7	1	4	6	social science	0	0	0	11	1	0	1	1	0
2003	1	0.0909091	16	2	0	75	social science	1	0	0	0	1	0.00826446	0.909091	0	1
2003	3	0.157895	12	1	0	46	social science	0	9	2	7	1	0.0249307	0.736842	1	9
2003	0	0	13	2	0	28	social science	0	0	0	8	1	0	1	1	0
2003	39	0.709091	12	2	0	82	social science	0	0	0	0	0	0.50281	0.290909	0	1521
2003	12	0.8	12	2	0	58	social science	0	0	0	0	0	0.64	0.2	0	144
2003	0	0	12	1	0	49	social science	0	23	12	11	1	0	0.454545	0	0
2003	0	0	20	1	0	28	social science	0	5	1	4	1	0	1	1	0
2003	4	0.8	4	3	5	13	social science	1	4	3	1	0	0.64	0.2	0	16
2003	12	1	7	5	5	20	social science	1	14	10	4	0	1	0	0	144
2003	0	0	18	1	4	17	social science	0	0	0	4	1	0	0.2	1	0
2003	0	0	20	3	3	19	social science	1	8	2	6	1	0	0.5	1	0
2003	0	0	16	4	10	67	social science	1	33	6	27	1	0	0.489796	1	0
2003	2	0.0869565	13	5	3	42	social science	0	33	8	25	1	0.00756144	0.73913	1	4
2003	0	0	5	1	4	20	social science	1	8	3	5	1	0	0.875	1	0
2003	0	0	6	1	6	26	social science	0	10	2	8	1	0	0.642857	1	0
2003	0	0	14	2	3	11	social science	0	0	0	0	1	0	1	0	0
2003	0	0	23	2	0	36	social science	0	0	0	1	1	0	0.454545	1	0
2003	0	0	18	2	4	52	social science	1	0	0	3	1	0	0.83871	1	0
2003	0	0	34	2	5	26	social science	1	0	0	5	1	0	0.2	1	0
2003	0	0	2	1	0	3	social science	0	0	0	1	1	0	1	1	0
2003	0	0	13	2	0	17	social science	1	0	0	9	1	0	1	1	0
2003	0	0	22	2	0	10	social science	1	6	1	5	1	0	0.75	1	0
2003	1	0.047619	9	2	4	35	social science	0	6	2	4	1	0.00226757	0.190476	1	1
2003	0	0	18	2	3	30	social science	0	0	0	3	1	0	1	1	0
2003	0	0	9	3	5	9	social science	0	0	0	2	1	0	0.6	1	0
2003	8	0.258065	9	5	0	35	social science	1	7	3	4	1	0.0665973	0.741935	1	64
2003	0	0	18	2	0	50	social science	0	0	0	1	1	0	0.766667	1	0
2003	9	0.36	8	3	4	38	social science	0	8	4	4	1	0.1296	0.52	0	81
2003	2	0.0714286	14	1	0	47	social science	0	0	0	5	1	0.00510204	0.928571	1	4
2003	0	0	26	2	5	23	social science	1	10	1	9	1	0	0.923077	1	0
2003	0	0	23	2	3	13	social science	0	4	3	1	1	0	0.9	0	0
2003	37	0.787234	31	2	0	52	social science	0	0	0	0	0	0.619738	0.212766	0	1369
2003	5	0.263158	13	3	3	59	social science	1	54	38	16	1	0.0692521	0.631579	0	25
2003	1	0.166667	7	2	5	16	social science	0	38	23	15	1	0.0277778	0.833333	0	1
2003	0	0	14	2	5	25	social science	1	40	18	22	1	0	0.909091	1	0
2003	0	0	9	3	4	19	social science	1	10	1	9	1	0	1	1	0
2003	0	0	9	2	5	38	social science	0	12	1	11	1	0	0.333333	1	0
2003	11	0.323529	19	5	4	62	social science	1	9	3	6	1	0.104671	0.205882	1	121
2003	9	0.75	7	5	0	16	social science	1	4	2	2	0	0.5625	0.25	0	81
2003	10	0.666667	9	4	0	24	social science	0	16	10	6	0	0.444444	0.333333	0	100
2003	2	1	2	4	0	4	social science	0	0	0	0	0	1	0	0	4
2003	4	0.4	12	2	0	24	social science	0	10	5	5	1	0.16	0.1	0	16
2003	1	0.25	22	4	0	15	social science	1	16	6	10	1	0.0625	0.75	1	1
2003	0	0	26	4	5	28	social science	1	10	2	8	1	0	1	1	0
2003	1	0.0666667	15	3	4	38	social science	0	4	2	2	1	0.00444444	0.8	0	1
2003	11	0.192982	29	3	0	110	social science	0	0	2	0	1	0.0372422	0.754386	0	121
2003	0	0	14	2	0	75	social science	0	0	0	4	1	0	1	1	0
2003	1	0.25	27	2	0	17	social science	1	11	5	6	1	0.0625	0.5	1	1
2003	0	0	28	1	0	31	social science	0	0	0	3	1	0	1	1	0
2003	3	0.136364	17	3	6	25	social science	1	19	13	6	1	0.018595	0.818182	0	9
2003	6	0.375	27	3	8	27	social science	1	55	26	29	1	0.140625	0.625	1	36
2003	0	0	24	3	4	49	social science	0	0	0	22	1	0	0.945946	1	0
2003	3	0.6	7	2	3	12	social science	0	0	0	0	0	0.36	0.4	0	9
2003	0	0	7	1	3	8	social science	0	0	0	2	1	0	1	1	0
2003	1	0.0769231	27	2	0	38	social science	0	0	0	3	1	0.00591716	0.153846	1	1
2003	1	0.25	23	1	0	29	social science	0	0	0	0	1	0.0625	0.75	0	1
2003	0	0	21	2	5	52	social science	0	5	4	1	1	0	0.785714	0	0
2003	6	0.26087	25	2	4	83	social science	0	9	7	2	1	0.0680529	0.434783	0	36
2003	3	0.272727	7	2	5	36	social science	1	18	9	9	1	0.0743802	0.727273	0	9
2003	2	0.0689655	19	1	5	43	social science	0	0	0	0	1	0.00475624	0.0344828	0	4
2003	1	0.125	13	3	0	10	social science	0	0	0	0	1	0.015625	0.875	0	1
2003	0	0	16	2	0	29	social science	0	10	2	8	1	0	0.6	1	0
2003	9	0.409091	12	4	2	31	social science	1	7	3	4	1	0.167355	0.545455	1	81
2003	1	0.0232558	9	10	0	69	social science	1	20	1	19	1	0.000540833	0.860465	1	1
2003	1	0.0212766	15	2	3	97	social science	0	0	0	15	1	0.000452693	0.659574	1	1
2003	1	0.047619	14	3	5	35	social science	0	6	1	5	1	0.00226757	0.761905	1	1
2003	7	0.137255	14	3	5	57	social science	1	19	3	16	1	0.0188389	0.490196	1	49
2003	0	0	12	3	0	11	social science	0	0	0	1	1	0	1	1	0
2003	6	0.75	4	1	6	11	social science	1	16	10	6	0	0.5625	0.25	0	36
2003	6	0.272727	9	3	4	38	social science	0	16	11	5	1	0.0743802	0.272727	0	36
2003	9	0.391304	9	9	5	39	social science	1	43	27	16	1	0.153119	0.391304	0	81
2003	2	0.0645161	20	2	0	59	social science	0	22	2	20	1	0.00416233	0.258065	1	4
2003	4	0.0606061	27	3	2	142	social science	0	37	2	35	1	0.00367309	0.181818	1	16
2003	0	0	12	2	6	28	social science	0	0	0	2	1	0	0.642857	1	0
2003	1	0.0666667	27	2	0	26	social science	1	41	13	28	1	0.00444444	0.933333	1	1
2003	0	0	15	3	0	27	social science	1	10	1	9	1	0	0.9375	1	0
2003	0	0	21	3	5	59	social science	1	32	12	20	1	0	0.944444	1	0
2003	1	0.05	17	1	0	39	social science	0	17	4	13	1	0.0025	0.95	1	1
2003	2	0.0740741	26	1	0	59	social science	0	0	0	0	1	0.00548697	0.851852	0	4
2003	18	0.75	11	10	0	59	social science	1	0	1	0	0	0.5625	0.208333	0	324
2003	0	0	14	3	3	30	social science	0	0	0	3	1	0	0.95	1	0
2003	5	0.0704225	18	2	0	124	social science	0	22	1	21	1	0.00495933	0.760563	1	25
2003	1	0.0526316	20	2	0	24	social science	0	0	0	8	1	0.00277008	0.315789	1	1
2003	3	0.25	6	2	4	13	social science	0	0	0	0	1	0.0625	0.75	0	9
2003	0	0	8	1	3	21	social science	0	0	0	0	1	0	0.818182	0	0
2003	0	0	16	3	4	47	social science	1	25	5	20	1	0	0.972973	1	0
2003	3	0.125	19	2	3	50	social science	0	2	1	1	1	0.015625	0.583333	0	9
2003	0	0	7	2	0	12	humanities	0	0	0	0	1	0		0	0
2003	1	0.0434783	30	3	0	52	social science	0	28	8	20	1	0.00189036	0.869565	1	1
2003	0	0	20	1	5	35	social science	0	0	0	2	1	0	0.928571	1	0
2003	0	0	15	2	5	21	social science	1	0	0	2	1	0	0.8	1	0
2003	5	0.625	12	3	0	24	social science	0	3	1	2	0	0.390625	0.375	1	25
2003	1	0.5	12	2	7	28	humanities	0	2	1	1	0	0.25	0.5	0	1
2003	4	0.285714	36	1	0	48	humanities	0	0	0	2	1	0.0816327		1	16
2003	0	0	16	1	0	51	social science	0	0	0	2	1	0	0	1	0
2003	0	0	15	3	8	28	social science	1	28	10	18	1	0	0.888889	1	0
2003	3	0.12	17	4	4	28	social science	1	50	10	40	1	0.0144	0.44	1	9
2003	3	0.107143	13	3	0	50	social science	1	39	13	26	1	0.0114796	0.892857	1	9
2003	3	0.0625	25	128	0	107	social science	1	32	7	25	1	0.00390625	0.833333	1	9
2003	6	0.75	4	7	3	15	social science	1	25	20	5	0	0.5625	0.25	0	36
2003	37	0.822222	6	4	4	48	social science	1	0	4	0	0	0.676049	0.155556	0	1369
2003	1	0.125	17	2	0	24	social science	0	0	3	0	1	0.015625	0.5	0	1
2003	0	0	11	1	5	28	social science	0	0	2	0	1	0	0.818182	0	0
2003	1	0.0434783	5	3	0	42	social science	1	6	1	5	1	0.00189036	0.956522	1	1
2003	5	0.208333	9	3	0	101	social science	1	13	2	11	1	0.0434028	0.791667	1	25
2003	23	0.71875	11	3	0	58	social science	1	9	5	4	0	0.516602	0.15625	0	529
2003	46	0.597403	12	2	0	101	social science	0	9	2	7	0	0.35689	0.363636	1	2116
2003	2	0.0625	10	4	0	73	social science	0	20	3	17	1	0.00390625	0.9375	1	4
2003	0	0	29	3	0	33	social science	1	0	0	9	1	0	0.821429	1	0
2003	1	0.0526316	19	1	5	42	social science	0	0	0	6	1	0.00277008	0.473684	1	1
2003	0	0	17	2	4	49	social science	0	19	5	14	1	0	0.75	1	0
2003	3	0.375	7	8	2	12	social science	1	0	0	0	1	0.140625	0.625	0	9
2003	0	0	28	1	0	67	social science	0	0	0	3	1	0	0.8	1	0
2003	0	0	7	2	3	40	social science	1	33	2	31	1	0	1	1	0
2003	3	0.1	11	2	3	47	social science	0	63	36	27	1	0.01	0.766667	0	9
2003	0	0	23	1	0	48	humanities	0	0	0	0	1	0		0	0
2003	40	1	14	4	6	41	social science	0	0	4	0	0	1	0	0	1600
2003	7	0.875	5	1	0	11	social science	0	0	0	0	0	0.765625	0.125	0	49
2003	2	0.2	6	3	0	15	social science	1	21	2	19	1	0.04	0.5	1	4
2003	0	0	6	2	0	11	social science	0	34	14	20	1	0	1	1	0
2003	1	0.0357143	16	2	9	35	social science	1	13	4	9	1	0.00127551	0.5	1	1
2003	6	1	6	3	0	10	social science	0	16	10	6	0	1	0	0	36
2003	0	0	14	3	4	26	social science	0	10	4	6	1	0	0.875	1	0
2003	3	0.375	10	2	6	37	social science	0	6	3	3	1	0.140625	0.5	0	9
2003	4	0.285714	24	2	0	20	social science	0	21	11	10	1	0.0816327	0.714286	0	16
2003	0	0	10	2	2	16	social science	1	0	0	22	1	0	0.6	1	0
2003	12	0.3	10	2	8	54	social science	0	0	0	3	1	0.09	0.65	1	144
2003	7	0.107692	14	1	5	83	social science	0	15	7	8	1	0.0115976	0.892308	1	49
2003	1	0.333333	8	5	0	10	social science	0	6	1	5	1	0.111111	0.666667	1	1
2003	0	0	6	1	0	8	social science	0	0	0	0	1	0	1	0	0
2003	0	0	12	1	4	29	social science	0	11	1	10	1	0	1	1	0
2003	1	0.125	3	5	7	10	social science	1	5	3	2	1	0.015625	0.375	0	1
2003	1	0.0238095	18	2	9	76	social science	1	42	2	40	1	0.000566893	0.666667	1	1
2003	3	0.125	25	2	0	92	social science	0	25	10	15	1	0.015625	0.458333	1	9
2003	0	0	14	4	6	100	social science	1	25	3	22	1	0	0.953125	1	0
2003	0	0	35	2	5	36	social science	1	0	0	13	1	0	0.894737	1	0
2003	0	0	14	3	0	70	social science	1	0	0	20	1	0	0.65	1	0
2003	0	0	21	3	0	95	social science	1	42	8	34	1	0	0.576923	1	0
2003	0	0	25	4	0	92	social science	1	37	6	31	1	0	0.82	1	0
2003	1	0.0555556	10	6	0	31	social science	1	23	5	18	1	0.00308642	0.777778	1	1
2003	1	0.0526316	19	6	6	36	social science	1	0	0	0	1	0.00277008	0.894737	0	1
2003	0	0	22	1	6	28	humanities	0	0	0	3	1	0		1	0
2003	1	0.0588235	14	3	3	30	social science	0	33	17	16	1	0.00346021	0.882353	0	1
2003	1	0.125	10	2	4	17	social science	0	8	7	1	1	0.015625	0.875	0	1
2003	0	0	12	2	3	33	social science	0	9	2	7	1	0	0.565217	1	0
2003	1	0.0357143	8	1	4	41	social science	0	0	0	12	1	0.00127551	0.607143	1	1
2003	31	0.72093	9	12	0	47	social science	1	20	14	6	0	0.51974	0.0930233	0	961
2003	9	0.818182	12	2	3	28	social science	0	17	13	4	0	0.669421	0.181818	0	81
2003	0	0	23	3	0	50	social science	1	24	4	20	1	0	0.75	1	0
2003	1	0.142857	13	1	0	34	social science	0	7	3	4	1	0.0204082	0.714286	1	1
2003	2	0.333333	8	1	0	21	social science	0	0	0	1	1	0.111111	0.166667	1	4
2003	1	0.0625	16	2	5	32	social science	0	2	1	1	1	0.00390625	0.5	0	1
2003	2	0.125	11	3	6	23	social science	1	19	6	13	1	0.015625	0.5625	1	4
2003	0	0	12	1	6	29	social science	0	0	0	4	1	0	1	1	0
2003	1	0.166667	30	2	5	42	social science	1	6	4	2	1	0.0277778	0.833333	0	1
2003	0	0	10	2	4	27	social science	0	24	3	21	1	0	1	1	0
2003	16	0.64	10	4	2	54	social science	1	32	6	26	0	0.4096	0.28	1	256
2003	3	0.25	5	4	6	17	social science	1	20	13	7	1	0.0625	0.75	0	9
2003	1	0.333333	10	1	0	14	social science	0	3	1	2	1	0.111111	0.333333	1	1
2003	12	0.631579	7	2	0	27	social science	0	0	0	1	0	0.398892	0.368421	1	144
2003	13	0.325	8	1	0	50	social science	0	6	3	3	1	0.105625	0.525	0	169
2003	0	0	20	1	0	52	social science	1	13	6	7	1	0	0.62069	1	0
2003	0	0	15	1	0	47	social science	0	15	1	14	1	0	0.952381	1	0
2003	0	0	36	2	0	44	social science	1	2	1	1	1	0	0.833333	0	0
2003	0	0	8	1	0	15	social science	0	0	0	11	1	0	1	1	0
2003	2	0.181818	14	2	0	23	social science	1	14	1	13	1	0.0330579	0.727273	1	4
2003	0	0	13	2	0	23	social science	1	0	0	1	1	0	1	1	0
2003	0	0	6	1	4	6	social science	0	3	1	2	1	0	1	1	0
2003	3	0.0588235	19	2	2	70	social science	0	0	0	4	1	0.00346021	0.45098	1	9
2003	0	0	15	2	4	57	social science	1	12	1	11	1	0	0.769231	1	0
2003	1	0.333333	26	3	0	42	social science	1	0	0	14	1	0.111111	0.666667	1	1
2003	0	0	17	2	3	45	social science	0	0	0	1	1	0	0.2	1	0
2003	10	0.625	11	3	4	25	social science	1	0	0	0	0	0.390625	0.375	0	100
2003	0	0	13	1	0	26	social science	1	0	0	6	1	0	1	1	0
2003	1	0.1	14	1	0	44	social science	0	0	0	2	1	0.01	0.6	1	1
2003	0	0	37	2	0	36	social science	0	0	0	0	1	0	1	0	0
2003	0	0	10	4	5	34	social science	1	4	1	3	1	0	1	1	0
2003	0	0	15	4	6	52	social science	1	0	0	4	1	0	0.648649	1	0
2003	0	0	19	3	6	49	social science	1	18	3	15	1	0	0.733333	1	0
2003	14	0.608696	14	4	0	45	social science	1	34	27	7	0	0.37051	0.130435	0	196
2003	1	0.047619	20	5	5	35	social science	1	31	2	29	1	0.00226757	0.952381	1	1
2003	0	0	13	1	3	14	social science	0	0	0	3	1	0	1	1	0
2003	0	0	18	4	7	79	social science	1	21	1	20	1	0	0.74	1	0
2003	0	0	25	2	0	57	social science	1	0	0	0	1	0	0.903226	0	0
2003	1	0.025641	16	2	0	64	social science	1	53	10	43	1	0.000657462	0.538462	1	1
2003	9	0.473684	10	4	4	32	social science	0	0	0	0	1	0.224377	0.473684	0	81
2003	0	0	7	4	0	24	social science	1	35	12	23	1	0	0.8	1	0
2003	5	1	14	2	0	24	social science	0	0	5	0	0	1	0	0	25
2003	0	0	11	3	5	17	social science	0	13	11	2	1	0	1	0	0
2003	0	0	13	2	4	6	social science	1	0	0	1	1	0	1	1	0
2003	0	0	9	2	3	16	social science	0	0	0	9	1	0	1	1	0
2003	1	0.0344828	17	4	0	46	social science	1	17	3	14	1	0.00118906	0.241379	1	1
2003	0	0	13	1	0	37	social science	0	0	0	4	1	0	1	1	0
2003	1	1	8	4	0	12	social science	0	0	0	0	0	1	0	0	1
2003	0	0	9	9	8	15	social science	1	7	5	2	1	0	1	0	0
2003	0	0	16	1	5	68	social science	0	0	0	13	1	0	1	1	0
2003	2	0.133333	15	3	6	19	social science	0	21	11	10	1	0.0177778	0.866667	0	4
2003	12	0.75	6	4	7	28	social science	0	0	0	0	0	0.5625	0	0	144
2003	0	0	19	2	4	17	social science	0	0	1	0	1	0	0.846154	0	0
2003	0	0	15	1	0	32	social science	0	15	1	14	1	0	0.96	1	0
2003	0	0	7	1	0	17	humanities	0	0	0	0	1	0		0	0
2003	0	0	17	3	0	18	social science	0	0	0	0	1	0	0.25	0	0
2003	0	0	22	1	0	45	social science	0	0	0	0	1	0	1	0	0
2003	1	0.0625	21	1	0	66	social science	0	0	0	0	1	0.00390625	0.625	0	1
2003	0	0	22	1	0	50	social science	0	0	0	0	1	0	0.833333	0	0
2003	0	0	30	1	0	12	social science	0	0	0	0	1	0	1	0	0
2003	4	0.25	15	2	4	108	social science	0	14	8	6	1	0.0625	0.6875	0	16
2003	7	0.538462	8	2	5	38	social science	0	8	5	3	0	0.289941	0.384615	0	49
2003	7	1	6	3	3	15	humanities	0	0	8	0	0	1		0	49
2003	5	0.714286	7	3	4	14	humanities	0	13	11	2	0	0.510204		0	25
2003	3	0.5	15	1	3	27	social science	0	0	0	1	0	0.25	0.333333	1	9
2003	5	0.416667	28	3	0	22	social science	1	8	4	4	1	0.173611	0.583333	0	25
2003	0	0	37	3	4	37	social science	0	38	3	35	1	0	0.857143	1	0
2003	0	0	23	1	0	57	social science	0	0	1	0	1	0	0	0	0
2003	0	0	23	1	0	55	humanities	0	0	0	0	1	0		0	0
2003	0	0	21	3	0	79	social science	0	0	0	1	1	0	0.5	1	0
2003	0	0	16	3	0	86	social science	1	0	0	5	1	0	0.294118	1	0
2003	0	0	7	6	3	12	social science	0	0	0	0	1	0	1	0	0
2003	0	0	17	3	0	45	social science	1	6	1	5	1	0	1	1	0
2003	2	0.25	14	1	0	33	social science	0	16	2	14	1	0.0625	0.75	1	4
2003	12	0.444444	18	1	4	43	social science	1	15	8	7	1	0.197531	0.555556	0	144
2003	3	0.0681818	24	1	5	101	social science	0	12	1	11	1	0.00464876	0.818182	1	9
2003	2	0.0487805	22	2	3	58	social science	0	0	0	15	1	0.00237954	0.585366	1	4
2003	8	0.205128	10	7	0	54	social science	1	9	1	8	1	0.0420776	0.769231	1	64
2003	0	0	15	1	0	20	social science	0	0	0	1	1	0	0.6	1	0
2003	0	0	24	3	0	76	social science	1	6	3	3	1	0	0.8125	0	0
2003	0	0	27	2	0	50	social science	1	0	0	11	1	0	0.392857	1	0
2003	1	0.0222222	10	3	0	73	social science	1	0	0	1	1	0.000493827	0.8	1	1
2003	0	0	10	3	4	42	social science	1	26	5	21	1	0	0.894737	1	0
2003	0	0	11	3	3	82	social science	1	39	11	28	1	0	0.916667	1	0
2003	0	0	25	1	0	19	humanities	0	0	0	0	1	0		0	0
2003	1	0.03125	14	4	0	47	social science	1	40	5	35	1	0.000976563	0.375	1	1
2003	0	0	10	2	3	20	social science	0	3	1	2	1	0	1	1	0
2003	25	0.806452	24	3	6	48	social science	0	18	12	6	0	0.650364	0.129032	0	625
2003	0	0	26	3	0	15	social science	1	25	2	23	1	0	0.5	1	0
2003	0	0	25	3	0	23	social science	1	18	1	17	1	0	0.210526	1	0
2003	1	0.0769231	26	1	0	22	social science	0	22	15	7	1	0.00591716	0.615385	0	1
2003	0	0	17	1	0	113	social science	0	0	0	0	1	0	0.794872	0	0
2003	0	0	36	3	0	52	social science	0	0	0	2	1	0	1	1	0
2003	0	0	16	2	0	41	social science	0	47	2	45	1	0	0.84	1	0
2003	0	0	17	1	6	13	humanities	0	12	7	5	1	0	0	0	0
2003	4	0.129032	14	2	0	58	social science	0	25	1	24	1	0.0166493	0.870968	1	16
2003	0	0	21	3	0	41	social science	1	7	1	6	1	0	0.56	1	0
2003	0	0	15	1	5	42	social science	0	0	0	4	1	0	1	1	0
2003	2	0.666667	13	2	0	58	social science	0	17	11	6	0	0.444444	0.333333	0	4
2003	0	0	9	2	3	22	social science	0	8	6	2	1	0	1	0	0
2003	1	0.166667	6	3	5	12	social science	0	9	5	4	1	0.0277778	0.833333	0	1
2003	1	0.0192308	21	2	5	76	social science	0	100	22	78	1	0.000369823	0.134615	1	1
2003	1	0.333333	12	3	0	40	social science	1	0	0	1	1	0.111111	0.333333	1	1
2003	1	0.333333	4	1	0	5	social science	0	0	0	0	1	0.111111	0.666667	0	1
2003	0	0	20	1	0	53	humanities	0	23	2	21	1	0		1	0
2003	4	0.0645161	21	3	5	79	social science	1	208	46	162	1	0.00416233	0.419355	1	16
2003	0	0	25	2	0	31	social science	1	0	0	1	1	0	1	1	0
2003	2	0.111111	11	6	0	33	social science	0	8	4	4	1	0.0123457	0.611111	0	4
2003	0	0	8	4	0	11	social science	0	0	0	1	1	0	0.666667	1	0
2003	2	0.0377359	16	1	2	81	social science	0	30	3	27	1	0.00142399	0.943396	1	4
2003	0	0	11	4	5	8	social science	0	0	0	8	1	0	1	1	0
2003	1	0.0909091	14	3	0	21	social science	0	0	0	2	1	0.00826446	0.909091	1	1
2003	3	0.2	6	1	0	18	social science	1	9	3	6	1	0.04	0.733333	1	9
2003	0	0	17	1	0	24	humanities	0	0	0	0	1	0	0	0	0
2003	0	0	39	2	0	83	social science	1	27	1	26	1	0	0.902439	1	0
2003	0	0	30	1	0	64	social science	0	0	0	0	1	0	1	0	0
2003	0	0	22	3	4	111	social science	1	50	5	45	1	0	0.934783	1	0
2003	1	0.5	8	1	0	13	social science	0	46	19	27	0	0.25	0	1	1
2003	1	0.142857	12	1	0	32	social science	0	0	0	1	1	0.0204082	0.857143	1	1
2003	0	0	3	2	0	5	social science	0	4	3	1	1	0	0.6	0	0
2003	2	0.133333	24	4	5	23	social science	1	4	2	2	1	0.0177778	0.8	0	4
2003	5	0.178571	8	2	0	43	social science	0	23	14	9	1	0.0318878	0.785714	0	25
2003	5	0.227273	11	3	6	30	social science	1	0	0	2	1	0.0516529	0.318182	1	25
2003	0	0	13	2	0	61	social science	1	100	9	91	1	0	0.83871	1	0
2003	1	0.5	2	1	0	5	social science	0	4	1	3	0	0.25	0.5	1	1
2003	1	0.2	9	2	0	9	social science	1	0	0	4	1	0.04	0.6	1	1
2003	2	0.0526316	18	3	0	70	social science	1	47	6	41	1	0.00277008	0.842105	1	4
2003	2	0.0588235	18	4	0	61	social science	1	28	1	27	1	0.00346021	0.882353	1	4
2003	0	0	25	2	0	54	social science	1	61	7	54	1	0	0.62069	1	0
2003	1	0.142857	15	3	0	10	social science	1	0	0	0	1	0.0204082	0.857143	0	1
2003	0	0	26	2	0	36	social science	1	0	0	0	1	0	1	0	0
2003	3	0.6	7	2	4	5	social science	0	7	2	5	0	0.36	0.4	1	9
2003	0	0	6	1	3	10	social science	0	0	0	0	1	0	1	0	0
2003	0	0	21	3	4	81	social science	0	18	2	16	1	0	0.583333	1	0
2003	0	0	22	1	4	38	social science	1	0	0	17	1	0	0.8125	1	0
2003	11	0.354839	13	2	8	80	social science	1	9	6	3	1	0.125911	0.612903	0	121
2003	0	0	12	2	0	18	social science	1	4	1	3	1	0	1	1	0
2003	0	0	20	2	9	12	social science	1	24	2	22	1	0	1	1	0
2003	0	0	11	2	0	50	social science	1	26	1	25	1	0	0.923077	1	0
2003	1	0.0232558	10	4	0	61	social science	1	0	0	14	1	0.000540833	0.906977	1	1
2003	8	0.533333	9	2	6	38	social science	0	5	1	4	0	0.284444	0.0666667	1	64
2003	0	0	9	1	0	20	social science	0	0	0	7	1	0	0.6	1	0
2003	10	0.151515	35	3	0	116	social science	0	110	55	55	1	0.0229568	0.848485	0	100
2003	1	0.0555556	14	3	3	26	social science	1	0	0	0	1	0.00308642	0.944444	0	1
2003	10	0.47619	32	2	9	37	social science	0	12	9	3	1	0.226757	0.52381	0	100
2003	0	0	13	3	6	63	social science	1	40	5	35	1	0	0.913044	1	0
2003	0	0	11	3	5	46	social science	0	48	5	43	1	0	0.965517	1	0
2003	0	0	8	1	0	30	humanities	0	0	0	1	1	0		1	0
2003	0	0	22	3	5	23	social science	1	10	1	9	1	0	0.833333	1	0
2003	4	0.114286	29	5	5	136	humanities	1	14	2	12	1	0.0130612		1	16
2003	2	0.666667	12	2	0	38	social science	0	18	11	7	0	0.444444	0	0	4
2003	3	0.230769	8	3	5	21	social science	1	5	4	1	1	0.0532544	0.769231	0	9
2003	1	0.1	15	2	0	18	social science	1	0	0	21	1	0.01	0.7	1	1
2003	8	0.666667	6	3	5	14	social science	1	12	8	4	0	0.444444	0.333333	0	64
2003	32	0.761905	10	6	5	50	social science	1	27	16	11	0	0.580499	0.119048	0	1024
2003	0	0	5	1	0	7	humanities	0	0	1	0	1	0		0	0
2003	0	0	19	3	4	74	social science	1	40	3	37	1	0	0.651163	1	0
2003	0	0	21	2	6	28	social science	0	0	0	2	1	0	1	1	0
2003	0	0	12	2	0	43	social science	0	0	0	1	1	0	0.916667	1	0
2003	14	0.518519	5	8	0	35	social science	1	64	37	27	0	0.268861	0.481481	0	196
2003	0	0	14	2	0	60	social science	0	4	1	3	1	0	1	1	0
2003	0	0	12	1	7	15	social science	0	0	0	1	1	0	1	1	0
2003	0	0	6	2	0	27	social science	1	23	2	21	1	0	0.681818	1	0
2003	3	0.0769231	9	1	0	59	social science	0	0	0	3	1	0.00591716	0.923077	1	9
2003	9	0.9	14	3	6	18	social science	1	0	1	0	0	0.81	0.1	0	81
2003	3	0.0769231	15	1	5	60	social science	0	19	2	17	1	0.00591716	0.897436	1	9
2003	0	0	12	3	0	65	social science	0	0	0	1	1	0	1	1	0
2003	0	0	17	1	4	18	social science	0	0	0	0	1	0	0.25	0	0
2003	0	0	32	2	5	27	social science	0	0	0	9	1	0	1	1	0
2003	6	0.857143	9	4	0	23	social science	1	86	46	40	0	0.734694	0.142857	0	36
2003	5	0.555556	13	3	0	27	social science	1	50	23	27	0	0.308642	0.333333	1	25
2003	0	0	18	3	0	57	social science	0	6	1	5	1	0	0.454545	1	0
2003	0	0	13	3	5	11	social science	0	0	0	11	1	0	1	1	0
2003	6	0.75	8	1	4	44	social science	0	11	9	2	0	0.5625	0.25	0	36
2003	7	0.5	14	2	3	46	social science	1	13	6	7	0	0.25	0.5	1	49
2003	8	0.32	31	2	0	38	social science	1	152	81	71	1	0.1024	0.68	0	64
2003	0	0	16	3	0	20	social science	1	0	0	1	1	0	1	1	0
2003	0	0	6	1	0	21	social science	0	0	0	1	1	0	1	1	0
2003	0	0	8	2	4	13	social science	0	0	0	4	1	0	1	1	0
2003	0	0	6	1	3	7	social science	0	2	1	1	1	0	0.833333	0	0
2003	2	0.222222	14	3	5	23	social science	1	7	1	6	1	0.0493827	0.777778	1	4
2003	1	0.333333	16	1	5	33	social science	0	7	1	6	1	0.111111	0	1	1
2003	4	0.363636	10	2	0	20	social science	0	4	1	3	1	0.132231	0.636364	1	16
2003	1	0.0526316	8	2	3	31	social science	1	17	12	5	1	0.00277008	0.842105	0	1
2003	13	0.619048	6	9	4	25	social science	1	19	16	3	0	0.38322	0.380952	0	169
2003	0	0	9	1	1	13	social science	1	0	0	2	1	0	0	1	0
2003	1	0.047619	11	1	0	46	social science	0	7	3	4	1	0.00226757	0.857143	1	1
2003	0	0	13	1	6	34	social science	0	30	7	23	1	0	1	1	0
2003	1	0.0357143	15	3	0	56	social science	1	0	0	0	1	0.00127551	0.321429	0	1
2003	3	0.0909091	18	2	4	39	social science	1	33	12	21	1	0.00826446	0.666667	1	9
2003	0	0	22	1	5	23	social science	0	19	2	17	1	0	1	1	0
2003	2	0.333333	20	3	5	29	humanities	1	9	1	8	1	0.111111	0.166667	1	4
2003	1	0.0416667	17	2	0	32	social science	0	33	4	29	1	0.00173611	0.541667	1	1
2003	0	0	28	3	0	22	social science	1	0	0	6	1	0	0.818182	1	0
2003	3	0.230769	21	2	5	45	social science	1	92	67	25	1	0.0532544	0.692308	0	9
2003	0	0	4	3	0	8	social science	0	4	2	2	1	0	1	0	0
2003	2	0.111111	15	3	3	27	social science	1	0	0	0	1	0.0123457	0.444444	0	4
2003	0	0	33	2	0	53	social science	1	11	1	10	1	0	0.769231	1	0
2003	1	0.111111	26	1	0	30	social science	0	23	3	20	1	0.0123457	0.777778	1	1
2003	2	0.105263	14	2	5	40	social science	0	22	6	16	1	0.0110803	0.894737	1	4
2003	2	0.181818	10	3	0	28	social science	0	5	3	2	1	0.0330579	0.818182	0	4
2003	0	0	18	2	0	42	social science	0	0	0	3	1	0	0.966667	1	0
2003	1	0.2	10	3	0	10	social science	0	19	11	8	1	0.04	0.6	0	1
2003	0	0	19	2	6	26	social science	0	0	0	13	1	0	1	1	0
2003	0	0	20	3	0	37	social science	1	0	0	7	1	0	0.619048	1	0
2003	0	0	20	1	4	22	social science	0	11	8	3	1	0	1	0	0
2003	2	0.285714	16	1	3	43	social science	0	4	3	1	1	0.0816327	0.714286	0	4
2003	0	0	15	2	5	22	social science	0	0	0	1	1	0	1	1	0
2003	0	0	17	1	0	34	social science	0	0	0	0	1	0	0.9	0	0
2003	0	0	28	1	0	33	social science	0	23	11	12	1	0	0.666667	1	0
2003	0	0	17	1	0	38	social science	0	0	0	2	1	0	0.857143	1	0
2003	0	0	9	3	5	24	social science	1	5	2	3	1	0	1	1	0
2003	4	0.571429	20	3	7	22	social science	1	28	24	4	0	0.326531	0.428571	0	16
2003	0	0	6	3	0	6	social science	0	0	1	0	1	0	1	0	0
2003	8	0.727273	8	1	0	41	social science	0	0	11	0	0	0.528926	0.272727	0	64
2003	0	0	20	3	0	56	social science	0	2	1	1	1	0	0.75	0	0
2003	0	0	57	4	0	101	social science	1	75	2	73	1	0	0.646154	1	0
2003	3	0.428571	13	4	4	42	social science	1	9	4	5	1	0.183673	0.428571	1	9
2003	3	0.375	4	7	3	13	social science	0	0	0	6	1	0.140625	0.625	1	9
2003	0	0	18	1	6	23	social science	0	23	2	21	1	0	1	1	0
2003	2	0.4	7	2	0	17	social science	1	0	0	0	1	0.16	0.2	0	4
2003	8	0.8	12	2	0	36	social science	1	5	4	1	0	0.64	0.1	0	64
2003	0	0	9	2	0	33	social science	0	0	0	2	1	0	0	1	0
2003	0	0	14	1	0	86	social science	0	47	6	41	1	0	0.966667	1	0
2003	1	0.0769231	42	1	0	69	social science	0	6	2	4	1	0.00591716	0.153846	1	1
2003	5	0.625	21	2	0	37	social science	1	13	10	3	0	0.390625	0.375	0	25
2003	1	0.111111	10	3	0	17	social science	1	0	0	0	1	0.0123457	0.777778	0	1
2003	9	0.75	16	3	0	34	social science	1	10	7	3	0	0.5625	0.25	0	81
2003	1	0.0526316	11	2	4	24	social science	0	5	4	1	1	0.00277008	0.947368	0	1
2003	1	0.0625	11	1	0	48	social science	0	4	1	3	1	0.00390625	0.9375	1	1
2003	4	0.25	17	2	3	69	social science	0	5	2	3	1	0.0625	0.375	1	16
2003	4	0.363636	17	3	4	39	social science	0	14	8	6	1	0.132231	0.636364	0	16
2003	9	0.473684	16	2	4	47	social science	0	38	17	21	1	0.224377	0.526316	1	81
2003	4	0.8	17	2	0	30	social science	1	0	0	2	0	0.64	0.2	1	16
2003	0	0	8	4	0	49	social science	1	32	3	29	1	0	0.882353	1	0
2003	2	0.0606061	17	1	3	67	social science	0	0	0	14	1	0.00367309	0.909091	1	4
2003	1	0.0555556	23	1	6	53	social science	0	5	1	4	1	0.00308642	0.888889	1	1
2003	0	0	19	2	6	61	social science	1	0	0	6	1	0	0.705882	1	0
2003	0	0	10	1	4	53	social science	0	27	2	25	1	0	0.84	1	0
2003	0	0	8	3	4	6	social science	1	0	0	4	1	0	1	1	0
2003	0	0	14	2	6	68	social science	0	9	2	7	1	0	0.894737	1	0
2003	1	0.0333333	12	2	6	67	social science	0	0	0	12	1	0.00111111	0.766667	1	1
2003	0	0	10	1	3	26	social science	0	0	0	8	1	0	0.8	1	0
2003	3	0.0652174	13	5	3	70	social science	0	20	6	14	1	0.00425331	0.869565	1	9
2003	0	0	27	2	4	95	social science	1	65	12	53	1	0	0.93617	1	0
2003	1	0.0454545	19	3	0	30	social science	1	27	8	19	1	0.00206612	0.954545	1	1
2003	0	0	12	3	6	22	social science	1	34	7	27	1	0	1	1	0
2003	2	0.0689655	14	2	0	46	social science	0	30	4	26	1	0.00475624	0.310345	1	4
2003	1	0.0769231	21	2	5	20	social science	1	70	10	60	1	0.00591716	0.846154	1	1
2003	0	0	6	4	4	13	social science	1	0	0	8	1	0	1	1	0
2003	0	0	21	2	3	25	social science	0	26	2	24	1	0	1	1	0
2003	0	0	23	2	3	12	social science	1	0	0	21	1	0	1	1	0
2003	0	0	6	5	0	30	social science	1	16	4	12	1	0	0.933333	1	0
2003	2	0.0487805	14	2	4	66	social science	0	0	0	5	1	0.00237954	0.658537	1	4
2003	0	0	4	4	0	21	social science	0	15	2	13	1	0	1	1	0
2003	0	0	19	2	3	29	social science	1	33	10	23	1	0	0.619048	1	0
2003	0	0	20	2	6	59	social science	1	29	3	26	1	0	0.365854	1	0
2003	1	0.0192308	38	2	0	112	social science	1	0	0	7	1	0.000369823	0.980769	1	1
2003	1	0.0285714	21	2	0	72	social science	1	23	2	21	1	0.000816327	0.371429	1	1
2003	0	0	7	2	4	11	social science	1	14	10	4	1	0	1	0	0
2003	2	0.666667	8	3	4	14	social science	0	0	4	0	0	0.444444	0.333333	0	4
2003	0	0	18	2	0	19	social science	1	0	0	2	1	0	1	1	0
2003	1	0.05	19	2	0	28	social science	0	11	2	9	1	0.0025	0.2	1	1
2003	0	0	17	3	0	27	social science	0	0	0	4	1	0	1	1	0
2003	1	0.125	14	3	9	41	social science	1	0	0	9	1	0.015625	0.75	1	1
2003	0	0	12	5	5	41	social science	0	0	0	4	1	0	0.923077	1	0
2003	2	0.2	12	3	0	27	social science	0	0	0	11	1	0.04	0.8	1	4
2003	2	0.0869565	6	2	0	30	social science	1	5	1	4	1	0.00756144	0.782609	1	4
2003	0	0	12	2	0	48	social science	0	0	0	5	1	0	1	1	0
2003	0	0	17	1	5	25	social science	0	15	9	6	1	0	1	0	0
2003	1	1	7	1	3	19	social science	0	0	13	0	0	1	0	0	1
2003	0	0	18	1	0	33	social science	0	0	0	0	1	0	1	0	0
2003	0	0	16	3	0	16	social science	1	0	0	2	1	0	1	1	0
2003	1	0.030303	9	2	3	41	social science	0	0	0	1	1	0.000918274	0.484849	1	1
2003	11	0.44	25	1	4	47	social science	0	21	6	15	1	0.1936	0.48	1	121
2003	1	0.333333	37	1	5	22	social science	0	10	5	5	1	0.111111	0.333333	0	1
2003	11	0.268293	17	2	0	69	social science	0	37	25	12	1	0.071981	0.682927	0	121
2003	14	0.636364	11	4	0	29	social science	1	11	5	6	0	0.404959	0.363636	1	196
2003	1	0.0285714	28	4	0	65	social science	1	47	13	34	1	0.000816327	0.828571	1	1
2003	1	0.0909091	19	1	0	81	social science	0	0	0	2	1	0.00826446	0.818182	1	1
2003	0	0	19	2	5	34	social science	0	6	4	2	1	0	1	0	0
2003	0	0	5	1	4	10	social science	0	3	1	2	1	0	0.8	1	0
2003	0	0	5	1	6	4	social science	0	0	0	0	1	0	1	0	0
2003	5	0.333333	31	1	0	60	social science	0	4	2	2	1	0.111111	0.466667	0	25
2003	1	0.111111	18	2	3	13	social science	1	0	0	0	1	0.0123457	0.666667	0	1
2003	0	0	5	2	0	30	social science	0	14	7	7	1	0	0.666667	0	0
2003	6	0.4	5	2	0	28	social science	0	11	9	2	1	0.16	0.533333	0	36
2003	3	0.0566038	41	2	0	105	social science	1	47	6	41	1	0.00320399	0.245283	1	9
2003	0	0	8	2	0	31	social science	1	49	10	39	1	0	0.727273	1	0
2003	0	0	14	3	3	35	social science	0	10	2	8	1	0	0.5	1	0
2003	0	0	36	3	0	51	social science	1	8	2	6	1	0	0.846154	1	0
2003	0	0	19	3	4	33	social science	1	0	0	3	1	0	0.913044	1	0
2003	0	0	23	2	4	12	social science	1	18	1	17	1	0	1	1	0
2003	0	0	12	1	3	18	social science	0	0	0	1	1	0	1	1	0
2003	1	0.0227273	28	2	5	78	social science	1	0	0	3	1	0.000516529	0.954545	1	1
2003	0	0	32	2	3	31	social science	1	149	12	137	1	0	0.48	1	0
2003	10	0.384615	14	3	6	57	social science	1	20	9	11	1	0.147929	0.615385	1	100
2003	1	0.0222222	20	4	0	68	social science	0	23	8	15	1	0.000493827	0.666667	1	1
2003	11	0.166667	14	1	0	98	social science	0	58	12	46	1	0.0277778	0.787879	1	121
2003	0	0	13	1	4	42	humanities	0	54	3	51	1	0		1	0
2003	2	0.222222	9	1	0	27	social science	0	48	10	38	1	0.0493827	0.666667	1	4
2003	1	0.166667	8	2	2	12	social science	1	13	11	2	1	0.0277778	0.833333	0	1
2003	0	0	35	1	0	48	social science	0	0	0	0	1	0	0.875	0	0
2003	3	0.0882353	16	2	0	57	social science	1	19	7	12	1	0.00778547	0.735294	1	9
2003	0	0	11	3	0	10	social science	1	10	4	6	1	0	0.777778	1	0
2003	0	0	8	3	4	11	social science	0	40	25	15	1	0	1	0	0
2003	3	0.3	10	2	0	26	social science	0	7	6	1	1	0.09	0.7	0	9
2003	0	0	8	3	0	24	social science	0	0	1	0	1	0	0.944444	0	0
2003	0	0	13	1	5	12	social science	0	0	2	0	1	0	1	0	0
2003	1	0.0434783	30	1	0	63	social science	0	0	0	5	1	0.00189036	0.826087	1	1
2003	19	0.826087	31	2	5	41	social science	0	5	3	2	0	0.68242	0.173913	0	361
2003	2	0.133333	11	2	0	30	social science	1	0	0	3	1	0.0177778	0.866667	1	4
2003	2	0.181818	11	3	0	24	social science	1	16	6	10	1	0.0330579	0.727273	1	4
2003	0	0	5	5	0	7	social science	1	0	1	0	1	0	1	0	0
2003	6	0.193548	17	6	0	47	social science	0	10	4	6	1	0.037461	0.612903	1	36
2003	5	0.227273	16	1	0	50	social science	0	19	6	13	1	0.0516529	0.545455	1	25
2003	10	0.769231	37	2	0	79	humanities	1	0	0	1	0	0.591716	0.230769	1	100
2003	0	0	18	3	5	64	social science	1	10	1	9	1	0	0.5	1	0
2003	0	0	11	2	5	25	social science	0	21	11	10	1	0	0.8	0	0
2003	1	0.142857	4	1	0	17	humanities	1	0	0	0	1	0.0204082		0	1
2003	0	0	15	3	0	34	social science	1	0	0	20	1	0	0.210526	1	0
2003	0	0	24	2	0	40	social science	1	3	1	2	1	0	1	1	0
2003	20	0.666667	9	2	5	46	social science	0	12	8	4	0	0.444444	0.2	0	400
2003	0	0	29	2	6	44	social science	1	0	0	0	1	0	1	0	0
2003	0	0	3	1	0	4	social science	0	0	0	0	1	0	0.666667	0	0
2003	9	0.391304	13	5	7	37	social science	0	19	11	8	1	0.153119	0.478261	0	81
2003	1	0.0526316	21	5	0	40	social science	1	78	24	54	1	0.00277008	0.736842	1	1
2003	1	0.1	19	3	3	19	social science	1	10	2	8	1	0.01	0.9	1	1
2003	0	0	25	4	4	5	social science	1	50	12	38	1	0	1	1	0
2003	1	0.5	11	2	3	4	social science	0	3	1	2	0	0.25	0.5	1	1
2003	0	0	19	3	4	13	social science	0	8	1	7	1	0	1	1	0
2003	0	0	35	2	4	38	social science	1	10	4	6	1	0	1	1	0
2003	0	0	12	3	3	16	social science	1	13	5	8	1	0	1	1	0
2003	0	0	9	1	3	8	social science	0	0	0	5	1	0	1	1	0
2003	6	0.4	12	4	6	27	social science	1	28	7	21	1	0.16	0.466667	1	36
2003	1	0.0666667	10	2	4	19	social science	0	0	0	0	1	0.00444444	0.866667	0	1
2003	1	0.0625	12	2	3	25	social science	0	0	0	4	1	0.00390625	0.875	1	1
2003	0	0	20	4	3	39	social science	0	0	0	5	1	0	1	1	0
2003	0	0	32	1	0	72	social science	0	6	1	5	1	0	1	1	0
2003	1	0.0555556	15	3	3	28	social science	1	12	1	11	1	0.00308642	0.944444	1	1
2003	3	1	11	3	3	21	social science	1	0	1	0	0	1	0	0	9
2003	0	0	1	3	0	1	humanities	0	0	0	0	1	0		0	0
2003	1	0.2	18	1	0	45	humanities	0	0	0	1	1	0.04		1	1
2003	0	0	3	1	0	6	humanities	0	0	0	0	1	0		0	0
2003	0	0	18	1	0	30	humanities	0	0	0	12	1	0		1	0
2003	0	0	21	2	0	25	humanities	1	13	2	11	1	0		1	0
2003	1	0.0384615	20	2	0	45	social science	1	0	0	4	1	0.00147929	0.346154	1	1
2003	3	0.75	6	1	0	23	social science	0	0	0	0	0	0.5625	0.25	0	9
2003	0	0	4	3	0	11	social science	0	0	0	0	1	0	0.8	0	0
2003	0	0	18	2	3	21	social science	1	11	2	9	1	0	0.769231	1	0
2003	0	0	15	2	4	63	social science	0	24	7	17	1	0	0.714286	1	0
2003	0	0	17	1	5	47	social science	0	0	0	1	1	0	0	1	0
2003	0	0	16	3	0	21	social science	1	0	0	1	1	0	0.375	1	0
2003	2	0.285714	16	2	5	21	social science	0	0	0	6	1	0.0816327	0.714286	1	4
2003	1	0.0454545	28	4	5	42	social science	1	0	0	0	1	0.00206612	0.954545	0	1
2003	1	0.0588235	17	2	0	21	social science	1	3	1	2	1	0.00346021	0.941176	1	1
2003	0	0	25	1	0	36	social science	0	13	1	12	1	0	1	1	0
2003	2	0.666667	17	3	5	15	social science	0	0	1	0	0	0.444444	0.333333	0	4
2003	7	0.466667	26	2	6	39	social science	0	13	4	9	1	0.217778	0.533333	1	49
2003	0	0	13	3	5	28	social science	1	0	0	8	1	0	1	1	0
2003	0	0	17	3	6	27	social science	1	0	0	7	1	0	1	1	0
2003	0	0	25	1	0	14	social science	0	11	2	9	1	0	0	1	0
2003	1	0.0555556	18	3	0	47	social science	0	0	0	0	1	0.00308642	0.333333	0	1
2003	0	0	18	1	7	24	social science	0	9	2	7	1	0	0.294118	1	0
2003	0	0	6	2	0	17	social science	1	0	0	3	1	0	0.571429	1	0
2003	0	0	11	4	0	48	social science	1	34	6	28	1	0	0.631579	1	0
2003	0	0	26	1	0	70	social science	0	0	0	1	1	0	1	1	0
2003	0	0	23	1	0	28	social science	0	0	0	0	1	0	1	0	0
2003	0	0	14	1	0	31	social science	0	7	1	6	1	0	0.9	1	0
2003	1	0.0322581	28	2	0	126	social science	1	4	1	3	1	0.00104058	0.806452	1	1
2003	0	0	22	4	0	52	social science	0	0	0	0	1	0	0.954545	0	0
2003	0	0	22	3	0	49	social science	0	0	0	0	1	0	1	0	0
2003	0	0	27	1	0	41	social science	0	0	0	1	1	0	1	1	0
2003	0	0	20	3	0	61	social science	1	42	10	32	1	0	0.466667	1	0
2003	0	0	14	2	0	30	social science	0	0	0	12	1	0	0.714286	1	0
2003	0	0	40	3	4	64	social science	1	77	13	64	1	0	0.355556	1	0
2003	0	0	26	3	3	32	social science	1	12	1	11	1	0	0.321429	1	0
2003	0	0	11	3	5	19	social science	0	7	3	4	1	0	1	1	0
2003	11	0.916667	18	2	7	18	social science	0	10	9	1	0	0.840278	0.0833333	0	121
2003	0	0	20	3	0	22	social science	0	0	0	12	1	0	0.8	1	0
2003	0	0	27	2	3	22	social science	0	27	3	24	1	0	0.923077	1	0
2003	0	0	5	2	0	6	social science	1	3	1	2	1	0	1	1	0
2003	0	0	24	3	0	58	social science	1	50	6	44	1	0	0.933333	1	0
2003	0	0	5	1	0	14	social science	0	0	0	2	1	0	1	1	0
2003	0	0	23	2	0	59	social science	1	40	10	30	1	0	0.833333	1	0
2003	1	0.0243902	24	1	0	69	social science	0	0	0	7	1	0.000594884	0.707317	1	1
2003	0	0	23	2	0	42	social science	1	0	0	11	1	0	0.851852	1	0
2003	0	0	10	2	0	27	social science	1	0	0	23	1	0	1	1	0
2003	0	0	22	1	0	88	social science	0	0	0	20	1	0	0.888889	1	0
2003	8	0.470588	13	8	7	26	social science	1	17	10	7	1	0.221453	0.411765	0	64
2003	1	0.0333333	22	4	5	56	social science	1	0	0	1	1	0.00111111	0.466667	1	1
2003	5	0.142857	32	6	0	52	social science	1	79	17	62	1	0.0204082	0.542857	1	25
2003	1	0.0909091	7	3	5	20	social science	0	30	17	13	1	0.00826446	0.454545	0	1
2003	20	0.588235	7	4	6	38	social science	1	42	28	14	0	0.346021	0.382353	0	400
2003	0	0	8	4	6	11	social science	0	0	2	0	1	0	0	0	0
2003	15	1	13	2	0	33	social science	1	0	1	0	0	1	0	0	225
2003	3	0.214286	22	2	3	30	social science	1	36	24	12	1	0.0459184	0.571429	0	9
2003	4	0.16	23	1	4	60	social science	0	0	0	0	1	0.0256	0.8	0	16
2003	9	0.36	27	4	5	64	humanities	1	0	1	0	1	0.1296		0	81
2003	0	0	25	1	0	37	social science	0	0	0	4	1	0	0.5	1	0
2003	5	0.555556	25	2	0	24	humanities	0	10	8	2	0	0.308642		0	25
2003	2	1	10	2	5	15	social science	1	10	9	1	0	1	0	0	4
2003	1	0.0333333	4	2	0	35	social science	0	4	2	2	1	0.00111111	0.766667	0	1
2003	3	0.6	10	3	6	15	social science	0	5	1	4	0	0.36	0	1	9
2003	1	0.5	7	5	6	10	social science	0	4	2	2	0	0.25	0.5	0	1
2003	1	1	15	2	0	14	social science	1	42	19	23	0	1	0	1	1
2003	3	0.166667	14	4	0	23	social science	1	10	2	8	1	0.0277778	0.833333	1	9
2003	22	0.709677	12	4	0	41	social science	1	7	6	1	0	0.503642	0.290323	0	484
2003	1	0.0909091	13	2	5	25	social science	0	11	1	10	1	0.00826446	0.727273	1	1
2003	0	0	15	1	6	71	social science	0	10	1	9	1	0	0.65	1	0
2003	4	0.153846	16	5	0	60	social science	1	19	1	18	1	0.0236686	0.692308	1	16
2003	0	0	20	2	0	29	social science	0	0	0	10	1	0	1	1	0
2003	1	0.0909091	10	4	0	19	social science	1	0	0	5	1	0.00826446	0.909091	1	1
2003	0	0	14	6	0	26	social science	1	0	0	1	1	0	1	1	0
2003	26	0.27957	42	1	0	122	social science	0	2	1	1	1	0.0781593	0.72043	0	676
2003	6	1	7	5	0	13	social science	1	0	0	0	0	1	0	0	36
2003	0	0	8	1	0	33	social science	1	15	1	14	1	0	0.4	1	0
2003	0	0	16	1	0	18	social science	0	19	16	3	1	0	1	0	0
2003	0	0	20	4	0	26	social science	1	5	2	3	1	0	1	1	0
2003	8	0.533333	16	3	0	21	social science	1	17	8	9	0	0.284444	0.4	1	64
2003	4	0.266667	7	1	0	46	social science	0	0	0	1	1	0.0711111	0.666667	1	16
2003	0	0	21	1	0	63	social science	0	0	0	5	1	0	1	1	0
2003	0	0	12	2	0	2	social science	0	0	0	4	1	0	0.5	1	0
2003	1	0.5	13	3	0	4	social science	0	0	0	4	0	0.25	0.5	1	1
2003	0	0	7	2	0	5	social science	0	5	2	3	1	0	1	1	0
2003	2	0.333333	13	1	0	21	social science	0	5	1	4	1	0.111111	0.666667	1	4
2003	3	1	11	3	0	8	social science	0	9	5	4	0	1	0	0	9
2003	0	0	20	1	0	37	humanities	0	0	0	0	1	0		0	0
2003	0	0	9	4	4	17	social science	1	0	0	3	1	0	0.916667	1	0
2003	6	0.4	7	3	7	28	social science	1	0	2	0	1	0.16	0.6	0	36
2003	0	0	10	1	0	33	social science	0	0	0	0	1	0	0.666667	0	0
2003	1	0.0217391	21	2	3	58	social science	1	29	6	23	1	0.00047259	0.73913	1	1
2003	0	0	9	2	0	27	humanities	0	0	0	1	1	0		1	0
2003	5	0.555556	15	2	5	30	social science	0	28	13	15	0	0.308642	0.444444	1	25
2003	5	0.454545	13	3	4	45	social science	1	13	3	10	1	0.206612	0.454545	1	25
2003	9	0.529412	15	2	3	37	social science	0	49	29	20	0	0.280277	0.470588	0	81
2003	0	0	19	2	0	23	social science	1	0	1	0	1	0	0.0833333	0	0
2003	3	0.12	27	3	0	29	social science	1	17	3	14	1	0.0144	0.88	1	9
2003	5	0.416667	14	3	7	15	social science	1	3	2	1	1	0.173611	0.5	0	25
2003	4	0.121212	12	8	4	49	social science	1	0	0	3	1	0.0146924	0.878788	1	16
2002	1	0.0277778	17	2	0	49	social science	1	27	2	25	1	0.000771605	0.805556	1	1
2002	1	0.0588235	15	1	0	41	social science	0	0	0	0	1	0.00346021	0.588235	0	1
2002	1	0.0666667	26	2	0	119	social science	1	0	0	0	1	0.00444444	0.8	0	1
2002	8	0.470588	6	5	0	42	social science	1	30	16	14	1	0.221453	0.411765	0	64
2002	0	0	28	1	0	142	social science	0	0	0	4	1	0	0.882353	1	0
2002	1	0.25	27	2	0	37	humanities	1	12	2	10	1	0.0625		1	1
2002	0	0	4	1	0	6	humanities	0	0	0	0	1	0		0	0
2002	3	0.125	23	3	0	41	humanities	1	35	11	24	1	0.015625		1	9
2002	1	0.111111	17	3	0	26	social science	1	0	0	8	1	0.0123457	0.888889	1	1
2002	17	0.369565	25	20	0	87	social science	1	0	0	0	1	0.136578	0.5	0	289
2002	9	0.473684	8	4	6	31	social science	0	12	4	8	1	0.224377	0.0526316	1	81
2002	0	0	17	4	0	16	social science	0	0	0	0	1	0	1	0	0
2002	3	0.333333	19	1	0	35	social science	0	0	0	0	1	0.111111	0.666667	0	9
2002	0	0	19	2	0	20	social science	0	0	0	0	1	0	0.333333	0	0
2002	15	0.882353	7	5	3	24	social science	0	0	0	1	0	0.778547	0	1	225
2002	1	0.0526316	17	3	0	53	social science	0	22	1	21	1	0.00277008	0.894737	1	1
2002	0	0	13	2	0	17	social science	0	0	0	1	1	0	1	1	0
2002	0	0	9	1	0	13	humanities	0	0	0	0	1	0		0	0
2002	2	0.666667	24	1	0	27	social science	0	0	0	1	0	0.444444	0.333333	1	4
2002	0	0	19	2	0	17	social science	0	4	2	2	1	0	1	0	0
2002	5	0.384615	21	2	4	46	humanities	1	5	2	3	1	0.147929		1	25
2002	0	0	21	1	6	43	social science	0	0	0	3	1	0	0.6875	1	0
2002	1	0.142857	9	3	6	11	social science	1	0	0	0	1	0.0204082	0.714286	0	1
2002	0	0	9	2	3	24	social science	0	3	2	1	1	0	1	0	0
2002	1	0.142857	22	2	6	37	social science	0	0	0	0	1	0.0204082	0.714286	0	1
2002	0	0	14	1	0	17	humanities	0	0	0	1	1	0	1	1	0
2002	0	0	27	2	0	30	social science	1	0	0	6	1	0	0.1875	1	0
2002	2	0.0689655	14	2	5	49	social science	0	5	2	3	1	0.00475624	0.206897	1	4
2002	1	0.2	10	5	4	15	social science	1	50	20	30	1	0.04	0.8	1	1
2002	1	0.142857	9	3	8	21	social science	1	0	0	0	1	0.0204082	0.857143	0	1
2002	0	0	8	3	6	23	social science	1	10	4	6	1	0	1	1	0
2002	3	0.176471	19	2	4	30	social science	0	2	1	1	1	0.0311419	0.823529	0	9
2002	1	0.0322581	19	2	4	60	social science	0	0	0	10	1	0.00104058	0.806452	1	1
2002	0	0	18	3	6	46	social science	0	0	0	6	1	0	0.633333	1	0
2002	11	0.392857	9	2	0	45	social science	0	0	0	0	1	0.154337	0.535714	0	121
2002	0	0	17	3	5	46	social science	1	26	2	24	1	0	0.861111	1	0
2002	0	0	16	3	4	75	social science	1	36	3	33	1	0	0.92	1	0
2002	1	0.0555556	20	1	6	78	social science	0	0	0	2	1	0.00308642	0.833333	1	1
2002	0	0	5	11	5	10	social science	0	0	0	0	1	0	1	0	0
2002	1	0.0909091	10	3	4	29	social science	0	18	3	15	1	0.00826446	0.818182	1	1
2002	0	0	5	1	0	7	social science	1	0	0	0	1	0	0.6	0	0
2002	0	0	21	1	0	27	social science	1	0	0	1	1	0	0.916667	1	0
2002	0	0	16	2	0	37	social science	0	51	5	46	1	0	0.25	1	0
2002	0	0	15	1	5	25	social science	0	0	0	6	1	0	0.8	1	0
2002	0	0	31	4	0	21	social science	1	342	59	283	1	0	0.384615	1	0
2002	0	0	6	1	4	14	social science	0	5	1	4	1	0	0.777778	1	0
2002	13	0.65	13	7	5	47	social science	1	35	22	13	0	0.4225	0.35	0	169
2002	0	0	20	1	5	12	social science	0	0	0	6	1	0	0.142857	1	0
2002	0	0	31	2	0	41	social science	1	35	3	32	1	0	0.757576	1	0
2002	8	0.615385	16	2	0	26	social science	1	9	4	5	0	0.378698	0	1	64
2002	2	0.181818	9	2	5	12	social science	0	6	5	1	1	0.0330579	0.818182	0	4
2002	7	0.777778	5	2	4	19	social science	1	8	4	4	0	0.604938	0.222222	0	49
2002	0	0	12	2	4	45	social science	0	24	6	18	1	0	0.73913	1	0
2002	4	0.235294	20	3	4	43	humanities	0	0	2	0	1	0.0553633		0	16
2002	0	0	5	5	0	9	social science	1	2	1	1	1	0	1	0	0
2002	0	0	22	2	0	53	social science	1	27	2	25	1	0	0.681818	1	0
2002	0	0	43	1	6	36	humanities	0	0	0	0	1	0		0	0
2002	45	0.56962	28	3	4	123	social science	0	34	26	8	0	0.324467	0.367089	0	2025
2002	2	0.166667	16	3	0	37	social science	1	0	0	0	1	0.0277778	0.833333	0	4
2002	7	0.5	8	3	0	27	social science	0	3	1	2	0	0.25	0.428571	1	49
2002	1	0.1	16	1	0	79	social science	0	0	0	0	1	0.01	0.9	0	1
2002	0	0	16	1	6	15	social science	0	6	2	4	1	0	0.272727	1	0
2002	0	0	6	4	0	20	social science	0	2	1	1	1	0	0.5	0	0
2002	0	0	5	2	0	5	social science	0	0	0	0	1	0	0	0	0
2002	0	0	25	4	0	22	social science	1	44	5	39	1	0	0.333333	1	0
2002	0	0	18	1	4	16	social science	0	0	0	1	1	0	1	1	0
2002	1	0.111111	11	2	6	18	social science	0	9	5	4	1	0.0123457	0.777778	0	1
2002	0	0	18	1	0	48	social science	0	0	0	1	1	0	0.882353	1	0
2002	0	0	5	1	0	3	humanities	0	0	0	1	1	0		1	0
2002	0	0	13	2	7	24	social science	1	14	5	9	1	0	1	1	0
2002	1	0.0294118	16	3	0	62	social science	0	43	15	28	1	0.000865052	0.941176	1	1
2002	0	0	3	1	0	2	social science	1	0	0	1	1	0	1	1	0
2002	1	0.0833333	9	1	0	38	social science	0	0	0	0	1	0.00694444	0.5	0	1
2002	0	0	15	4	7	28	social science	1	42	10	32	1	0	0.909091	1	0
2002	15	0.6	7	3	8	55	social science	1	4	3	1	0	0.36	0.4	0	225
2002	26	0.928571	6	4	0	47	social science	0	19	16	3	0	0.862245	0.0714286	0	676
2002	1	0.166667	20	2	4	12	social science	0	0	0	0	1	0.0277778	0.833333	0	1
2002	4	0.333333	13	4	0	21	social science	1	27	13	14	1	0.111111	0.25	1	16
2002	0	0	29	3	0	14	social science	0	0	0	1	1	0	1	1	0
2002	0	0	7	1	3	6	social science	0	0	0	2	1	0	1	1	0
2002	3	0.0909091	8	4	3	50	social science	1	8	1	7	1	0.00826446	0.909091	1	9
2002	2	0.0444444	11	9	0	73	social science	1	45	2	43	1	0.00197531	0.755556	1	4
2002	4	0.285714	9	4	0	55	social science	0	6	4	2	1	0.0816327	0.5	0	16
2002	0	0	24	1	6	125	social science	0	0	0	8	1	0	0.555556	1	0
2002	0	0	5	1	6	8	social science	0	0	0	14	1	0	1	1	0
2002	1	0.0384615	23	3	0	79	social science	1	0	0	13	1	0.00147929	0.730769	1	1
2002	1	0.0625	27	2	0	87	social science	0	0	0	9	1	0.00390625	0.9375	1	1
2002	1	0.166667	9	1	4	21	social science	1	0	0	2	1	0.0277778	0.833333	1	1
2002	0	0	9	2	2	35	social science	1	3	1	2	1	0	0.956522	1	0
2002	0	0	10	4	0	32	social science	0	7	1	6	1	0	0.95	1	0
2002	11	0.423077	18	6	0	47	social science	1	11	3	8	1	0.178994	0.5	1	121
2002	0	0	18	1	6	21	social science	1	0	2	0	1	0	1	0	0
2002	7	0.225806	28	3	5	48	social science	0	33	20	13	1	0.0509886	0.677419	0	49
2002	1	0.333333	11	1	8	10	social science	1	0	0	0	1	0.111111	0.666667	0	1
2002	0	0	13	1	6	23	social science	0	13	12	1	1	0	0.5	0	0
2002	0	0	17	1	4	11	social science	0	0	0	1	1	0	1	1	0
2002	0	0	10	1	2	14	social science	0	0	0	3	1	0	1	1	0
2002	0	0	14	2	6	17	social science	0	0	0	4	1	0	0.583333	1	0
2002	1	0.0909091	5	2	0	22	social science	1	44	42	2	1	0.00826446	0.545455	0	1
2002	0	0	19	2	7	62	social science	1	12	3	9	1	0	0.75	1	0
2002	1	0.0166667	17	2	4	81	social science	1	105	12	93	1	0.000277778	0.866667	1	1
2002	2	0.142857	10	2	0	22	social science	0	0	0	10	1	0.0204082	0.857143	1	4
2002	2	0.25	13	3	6	17	social science	1	14	7	7	1	0.0625	0.75	0	4
2002	1	0.25	9	2	7	16	social science	0	26	7	19	1	0.0625	0.75	1	1
2002	8	0.333333	12	4	6	44	social science	0	25	14	11	1	0.111111	0.666667	0	64
2002	0	0	10	3	6	17	social science	1	7	1	6	1	0	1	1	0
2002	1	0.0833333	12	3	0	32	social science	1	0	0	3	1	0.00694444	0.0833333	1	1
2002	1	0.0714286	7	2	4	30	social science	0	16	5	11	1	0.00510204	0.928571	1	1
2002	0	0	9	4	2	37	social science	0	27	17	10	1	0	1	0	0
2002	0	0	18	3	5	47	social science	0	42	31	11	1	0	0.904762	0	0
2002	1	0.2	19	2	0	19	social science	1	11	1	10	1	0.04	0	1	1
2002	0	0	14	2	0	10	social science	0	15	6	9	1	0	0	1	0
2002	0	0	12	4	0	49	social science	1	0	0	0	1	0	1	0	0
2002	0	0	5	2	0	11	social science	1	0	0	1	1	0	0.833333	1	0
2002	1	0.0454545	15	3	4	27	social science	0	0	0	2	1	0.00206612	0.5	1	1
2002	0	0	10	3	0	30	social science	1	43	4	39	1	0	0.818182	1	0
2002	0	0	11	2	0	102	social science	1	88	7	81	1	0	0.921053	1	0
2002	0	0	6	2	0	10	social science	1	29	7	22	1	0	0.666667	1	0
2002	1	0.2	12	7	0	13	social science	1	31	13	18	1	0.04	0.8	1	1
2002	9	0.5	13	2	0	30	social science	0	0	0	0	0	0.25	0.388889	0	81
2002	32	1	9	4	0	71	social science	1	18	16	2	0	1	0	0	1024
2002	3	0.09375	18	1	0	47	social science	0	22	5	17	1	0.00878906	0.40625	1	9
2002	4	0.166667	25	5	0	48	social science	1	16	5	11	1	0.0277778	0.416667	1	16
2002	11	0.6875	8	3	3	29	social science	0	34	29	5	0	0.472656	0.3125	0	121
2002	23	0.605263	18	1	5	89	social science	0	55	26	29	0	0.366343	0.368421	1	529
2002	32	0.780488	12	7	0	52	social science	0	7	6	1	0	0.609161	0.219512	0	1024
2002	0	0	10	2	0	10	social science	1	41	5	36	1	0	0.8	1	0
2002	0	0	13	1	3	21	social science	0	0	0	0	1	0	1	0	0
2002	10	0.714286	9	3	3	37	social science	0	0	1	0	0	0.510204	0.214286	0	100
2002	5	0.833333	12	2	4	18	social science	1	11	6	5	0	0.694444	0.166667	0	25
2002	6	0.666667	4	4	3	14	social science	1	0	0	0	0	0.444444	0.333333	0	36
2002	2	0.5	10	1	9	39	social science	0	11	4	7	0	0.25	0.5	1	4
2002	2	0.105263	17	2	6	26	social science	1	0	0	2	1	0.0110803	0.263158	1	4
2002	0	0	20	1	0	31	social science	0	0	0	11	1	0	0.736842	1	0
2002	0	0	23	1	4	111	social science	0	22	2	20	1	0	0.871795	1	0
2002	26	0.666667	6	4	6	48	social science	1	42	34	8	0	0.444444	0.333333	0	676
2002	2	0.333333	16	1	0	23	social science	0	0	0	4	1	0.111111	0.5	1	4
2002	0	0	26	2	3	25	social science	1	21	4	17	1	0	0.875	1	0
2002	0	0	22	3	0	36	social science	1	18	3	15	1	0	1	1	0
2002	0	0	29	2	6	37	social science	1	0	0	0	1	0	1	0	0
2002	0	0	18	1	5	8	social science	0	0	0	0	1	0	1	0	0
2002	0	0	31	2	5	31	social science	1	8	1	7	1	0	1	1	0
2002	1	0.25	27	1	10	23	humanities	0	0	0	1	1	0.0625	0.25	1	1
2002	0	0	18	2	4	7	social science	1	37	1	36	1	0	1	1	0
2002	1	0.0222222	21	3	0	75	social science	1	9	3	6	1	0.000493827	0.888889	1	1
2002	2	0.125	13	1	0	45	social science	0	0	0	7	1	0.015625	0.6875	1	4
2002	0	0	5	2	0	8	social science	0	0	0	1	1	0	1	1	0
2002	0	0	26	3	3	14	social science	1	30	1	29	1	0	0.692308	1	0
2002	0	0	33	2	0	77	social science	1	0	0	0	1	0	1	0	0
2002	0	0	22	1	0	34	humanities	0	0	0	8	1	0		1	0
2002	0	0	11	4	6	36	social science	1	31	16	15	1	0	0.8	0	0
2002	14	0.875	13	3	4	20	social science	0	0	0	0	0	0.765625	0.125	0	196
2002	0	0	6	1	0	5	social science	0	0	0	0	1	0	1	0	0
2002	16	0.571429	13	1	0	71	social science	0	14	7	7	0	0.326531	0.428571	0	256
2002	5	0.147059	10	5	5	79	social science	0	34	12	22	1	0.0216263	0.823529	1	25
2002	2	0.142857	9	1	0	20	social science	0	0	0	0	1	0.0204082	0.785714	0	4
2002	1	0.0232558	21	3	6	82	social science	1	16	1	15	1	0.000540833	0.813953	1	1
2002	1	0.0769231	12	2	5	23	social science	0	52	16	36	1	0.00591716	0.384615	1	1
2002	1	0.125	13	2	7	35	social science	1	2	1	1	1	0.015625	0.75	0	1
2002	3	0.0810811	37	3	7	65	social science	1	32	2	30	1	0.00657414	0.918919	1	9
2002	0	0	9	2	5	13	social science	1	0	0	0	1	0	1	0	0
2002	0	0	7	3	0	30	social science	1	0	0	1	1	0	1	1	0
2002	0	0	5	1	0	4	social science	0	3	1	2	1	0	1	1	0
2002	2	0.111111	7	4	4	26	social science	1	6	2	4	1	0.0123457	0.833333	1	4
2002	0	0	21	5	0	22	social science	1	33	17	16	1	0	1	0	0
2002	0	0	14	2	0	42	social science	1	27	4	23	1	0	0.96875	1	0
2002	2	0.0952381	16	5	0	42	social science	1	12	7	5	1	0.0090703	0.714286	0	4
2002	0	0	28	2	0	34	humanities	0	0	0	0	1	0		0	0
2002	3	0.0731707	16	2	0	64	social science	1	85	17	68	1	0.00535396	0.756098	1	9
2002	0	0	20	1	0	45	social science	0	0	0	6	1	0	1	1	0
2002	2	0.142857	17	2	3	36	humanities	0	3	1	2	1	0.0204082		1	4
2002	12	0.631579	19	1	3	34	social science	0	2	1	1	0	0.398892	0.105263	0	144
2002	5	0.333333	12	2	8	21	social science	1	17	12	5	1	0.111111	0.666667	0	25
2002	0	0	20	2	7	26	social science	1	0	0	1	1	0	1	1	0
2002	1	0.25	31	1	5	49	social science	0	6	1	5	1	0.0625	0.75	1	1
2002	0	0	21	2	3	19	social science	1	0	0	4	1	0	1	1	0
2002	14	0.608696	12	6	0	28	social science	1	0	0	2	0	0.37051	0.26087	1	196
2002	14	0.451613	17	3	5	50	social science	1	8	4	4	1	0.203954	0.483871	0	196
2002	2	0.125	15	2	3	24	social science	0	0	0	5	1	0.015625	0.0625	1	4
2002	5	0.333333	15	1	4	28	social science	0	22	11	11	1	0.111111	0.666667	0	25
2002	0	0	12	3	3	42	social science	1	0	0	0	1	0	0.166667	0	0
2002	3	0.333333	7	3	3	24	social science	1	5	3	2	1	0.111111	0.222222	0	9
2002	2	0.5	18	2	3	29	social science	1	10	4	6	0	0.25	0.5	1	4
2002	1	0.1	20	2	3	28	social science	0	0	0	6	1	0.01	0.6	1	1
2002	1	0.166667	18	4	0	47	social science	1	3	2	1	1	0.0277778	0	0	1
2002	0	0	24	2	2	11	social science	1	4	1	3	1	0	0	1	0
2002	2	0.25	7	4	3	13	social science	0	7	2	5	1	0.0625	0.125	1	4
2002	0	0	12	2	4	43	social science	1	70	12	58	1	0	1	1	0
2002	1	0.0384615	18	1	8	56	social science	0	11	1	10	1	0.00147929	0.730769	1	1
2002	1	0.0294118	18	3	6	70	social science	0	16	7	9	1	0.000865052	0.794118	1	1
2002	3	0.428571	18	3	0	16	social science	1	9	4	5	1	0.183673	0.571429	1	9
2002	1	0.0588235	14	2	0	36	social science	1	0	0	2	1	0.00346021	0.588235	1	1
2002	1	0.037037	20	2	0	43	social science	1	9	1	8	1	0.00137174	0.407407	1	1
2002	0	0	20	2	0	29	social science	1	0	0	1	1	0	0.846154	1	0
2002	0	0	16	1	0	56	social science	0	0	0	1	1	0	1	1	0
2002	0	0	24	2	7	50	social science	1	19	1	18	1	0	0.84	1	0
2002	0	0	17	1	0	12	social science	0	0	0	5	1	0	1	1	0
2002	0	0	11	3	8	22	social science	0	0	1	0	1	0	1	0	0
2002	0	0	31	2	2	42	social science	1	334	49	285	1	0	0.388889	1	0
2002	0	0	37	1	0	16	social science	0	0	0	2	1	0	0.222222	1	0
2002	1	0.0625	27	3	0	44	social science	1	29	4	25	1	0.00390625	0.5625	1	1
2002	0	0	23	3	0	82	social science	1	0	0	10	1	0	0.872727	1	0
2002	0	0	22	3	0	61	social science	1	43	7	36	1	0	0.939394	1	0
2002	0	0	18	2	0	58	social science	1	0	0	24	1	0	0.794118	1	0
2002	0	0	18	3	0	54	social science	0	86	18	68	1	0	0.8125	1	0
2002	0	0	9	2	0	49	social science	1	8	1	7	1	0	0.810811	1	0
2002	6	0.352941	24	3	3	32	social science	0	11	9	2	1	0.124567	0.647059	0	36
2002	1	0.025	17	2	3	59	social science	0	3	1	2	1	0.000625	0.975	1	1
2002	0	0	24	2	4	26	social science	1	16	2	14	1	0	1	1	0
2002	1	1	4	1	0	3	humanities	0	0	0	0	0	1		0	1
2002	0	0	24	1	0	37	humanities	0	23	4	19	1	0		1	0
2002	0	0	11	3	4	22	social science	0	0	0	3	1	0	1	1	0
2002	0	0	11	3	6	29	social science	0	0	0	3	1	0	1	1	0
2002	1	0.0232558	11	3	0	62	social science	0	6	1	5	1	0.000540833	0.348837	1	1
2002	2	0.0425532	14	2	0	94	social science	1	0	0	4	1	0.00181077	0.212766	1	4
2002	1	0.25	24	2	3	9	social science	1	8	6	2	1	0.0625	0.75	0	1
2002	1	0.0344828	27	3	0	35	social science	1	0	0	26	1	0.00118906	0.413793	1	1
2002	0	0	17	1	5	7	social science	0	0	0	4	1	0	1	1	0
2002	0	0	4	2	0	4	social science	1	0	0	2	1	0	1	1	0
2002	0	0	8	4	5	49	social science	0	0	0	5	1	0	0.142857	1	0
2002	5	0.384615	6	6	0	32	social science	1	20	10	10	1	0.147929	0.615385	0	25
2002	1	0.5	1	4	0	2	social science	1	0	0	0	0	0.25	0.5	0	1
2002	0	0	15	1	7	5	social science	0	0	1	0	1	0	1	0	0
2002	0	0	9	1	0	21	social science	0	0	0	0	1	0	1	0	0
2002	0	0	11	3	0	31	social science	1	44	2	42	1	0	0.727273	1	0
2002	10	0.769231	12	3	0	22	social science	0	17	14	3	0	0.591716	0.230769	0	100
2002	13	0.619048	12	3	0	35	social science	0	23	11	12	0	0.38322	0.380952	1	169
2002	0	0	14	2	4	24	social science	1	30	7	23	1	0	0.944444	1	0
2002	10	0.4	8	5	4	30	social science	1	33	11	22	1	0.16	0.24	1	100
2002	4	0.666667	7	3	6	14	social science	0	17	6	11	0	0.444444	0	1	16
2002	0	0	17	1	3	73	social science	0	9	1	8	1	0	0.413043	1	0
2002	0	0	9	4	6	25	social science	0	0	0	4	1	0	0.428571	1	0
2002	0	0	15	4	0	28	social science	1	13	1	12	1	0	1	1	0
2002	8	0.32	11	3	0	33	social science	1	0	0	3	1	0.1024	0.16	1	64
2002	5	1	6	3	5	12	social science	0	5	4	1	0	1	0	0	25
2002	2	0.25	7	1	0	13	social science	0	0	0	0	1	0.0625	0.75	0	4
2002	1	0.0625	20	2	0	65	social science	1	4	1	3	1	0.00390625	0.8125	1	1
2002	3	0.272727	9	1	4	16	social science	0	15	14	1	1	0.0743802	0.272727	0	9
2002	0	0	31	3	6	46	social science	1	42	5	37	1	0	0.833333	1	0
2002	0	0	15	4	4	32	social science	1	3	2	1	1	0	1	0	0
2002	2	0.1	15	5	0	30	social science	1	38	20	18	1	0.01	0.85	0	4
2002	0	0	9	2	0	31	social science	1	0	0	4	1	0	1	1	0
2002	0	0	33	1	4	16	social science	0	0	0	6	1	0	0.5	1	0
2002	0	0	25	2	4	50	social science	0	125	32	93	1	0	0.535714	1	0
2002	0	0	8	2	0	54	social science	1	0	0	13	1	0	0.868421	1	0
2002	0	0	22	1	5	44	social science	0	12	1	11	1	0	0.794872	1	0
2002	5	0.227273	7	5	4	25	social science	0	24	16	8	1	0.0516529	0.772727	0	25
2002	0	0	13	2	6	17	social science	1	0	0	0	1	0	0.909091	0	0
2002	1	0.0416667	12	2	0	28	social science	1	16	3	13	1	0.00173611	0.958333	1	1
2002	21	0.677419	25	2	0	48	social science	0	5	4	1	0	0.458897	0.16129	0	441
2002	1	0.333333	18	1	0	24	social science	0	0	0	3	1	0.111111	0	1	1
2002	27	0.613636	21	3	7	157	social science	1	17	14	3	0	0.37655	0.386364	0	729
2002	0	0	13	2	4	28	social science	0	0	0	11	1	0	0.818182	1	0
2002	0	0	22	1	6	35	humanities	0	35	4	31	1	0		1	0
2002	1	0.0666667	22	2	3	24	humanities	0	17	2	15	1	0.00444444		1	1
2002	2	0.666667	3	3	0	4	social science	1	4	2	2	0	0.444444	0.333333	0	4
2002	0	0	2	3	0	3	social science	1	0	0	0	1	0	1	0	0
2002	0	0	10	1	3	39	social science	0	0	0	0	1	0	1	0	0
2002	0	0	14	9	4	54	social science	1	13	2	11	1	0	0.482759	1	0
2002	0	0	14	1	3	34	social science	0	20	3	17	1	0	1	1	0
2002	23	0.851852	7	6	5	29	social science	1	51	45	6	0	0.725652	0.0740741	0	529
2002	0	0	12	1	0	23	social science	0	0	0	3	1	0	0.857143	1	0
2002	1	0.111111	13	1	0	52	social science	0	7	1	6	1	0.0123457	0.111111	1	1
2002	0	0	30	2	0	16	social science	0	24	5	19	1	0	0.9	1	0
2002	0	0	37	2	0	45	social science	1	0	0	0	1	0	0.777778	0	0
2002	0	0	5	2	0	9	social science	1	0	0	3	1	0	1	1	0
2002	0	0	9	1	0	19	social science	0	5	1	4	1	0	1	1	0
2002	1	0.5	7	1	0	20	social science	0	7	1	6	0	0.25	0.5	1	1
2002	1	1	8	1	0	16	social science	0	5	1	4	0	1	0	1	1
2002	1	0.25	8	1	0	26	social science	0	6	1	5	1	0.0625	0.75	1	1
2002	0	0	29	3	0	64	social science	0	15	1	14	1	0	0.451613	1	0
2002	0	0	17	2	0	15	social science	1	8	3	5	1	0	1	1	0
2002	0	0	20	2	0	31	social science	0	0	0	5	1	0	0.416667	1	0
2002	0	0	13	3	0	11	social science	0	0	0	0	1	0	1	0	0
2002	2	0.166667	16	1	0	19	social science	0	0	0	0	1	0.0277778	0.833333	0	4
2002	9	0.642857	7	4	6	23	social science	1	20	9	11	0	0.413265	0.285714	1	81
2002	18	0.391304	17	6	0	60	social science	1	9	4	5	1	0.153119	0.521739	1	324
2002	0	0	6	1	0	7	social science	0	0	0	0	1	0	1	0	0
2002	1	0.0625	15	2	5	48	social science	0	7	1	6	1	0.00390625	0.8125	1	1
2002	2	0.333333	4	1	0	9	social science	0	0	0	3	1	0.111111	0.333333	1	4
2002	0	0	7	1	0	12	social science	0	0	0	0	1	0	0.833333	0	0
2002	2	0.111111	15	4	0	43	social science	1	103	19	84	1	0.0123457	0.611111	1	4
2002	1	0.025641	12	3	0	48	social science	1	0	0	3	1	0.000657462	0.948718	1	1
2002	0	0	9	2	0	9	social science	1	0	0	0	1	0	1	0	0
2002	1	0.05	23	2	5	48	social science	1	45	1	44	1	0.0025	0.95	1	1
2002	1	0.05	9	3	0	30	social science	0	17	3	14	1	0.0025	0.9	1	1
2002	14	0.333333	11	4	0	69	social science	0	67	27	40	1	0.111111	0.595238	1	196
2002	0	0	25	1	0	28	social science	0	19	6	13	1	0	0.642857	1	0
2002	0	0	6	2	3	5	social science	1	0	0	4	1	0	0	1	0
2002	3	0.15	17	2	0	51	social science	0	4	1	3	1	0.0225	0.7	1	9
2002	0	0	20	1	0	13	social science	0	0	0	1	1	0	1	1	0
2002	0	0	15	2	0	31	social science	0	0	0	4	1	0	1	1	0
2002	0	0	17	3	0	26	social science	1	0	0	12	1	0	0.75	1	0
2002	6	0.285714	32	1	5	32	social science	1	4	1	3	1	0.0816327	0.666667	1	36
2002	2	0.0952381	44	3	7	27	social science	1	26	8	18	1	0.0090703	0.904762	1	4
2002	36	0.45	25	3	0	115	social science	1	95	53	42	1	0.2025	0.5375	0	1296
2002	0	0	37	3	5	42	social science	1	0	0	1	1	0	0	1	0
2002	3	0.0967742	28	3	4	45	social science	1	0	0	10	1	0.00936524	0.451613	1	9
2002	2	0.166667	18	3	0	20	social science	1	0	0	4	1	0.0277778	0.166667	1	4
2002	22	0.846154	15	7	3	53	social science	1	33	10	23	0	0.715976	0.153846	1	484
2002	0	0	21	2	0	76	social science	1	71	12	59	1	0	0.903226	1	0
2002	0	0	28	3	3	28	social science	0	3	1	2	1	0	0.909091	1	0
2002	0	0	13	2	3	20	social science	0	0	0	0	1	0	1	0	0
2002	1	0.2	17	2	4	70	social science	0	6	4	2	1	0.04	0.6	0	1
2002	0	0	13	3	3	12	social science	1	0	0	11	1	0	1	1	0
2002	0	0	16	1	5	22	social science	0	0	1	0	1	0	1	0	0
2002	11	0.733333	24	3	0	25	social science	0	8	4	4	0	0.537778	0.2	0	121
2002	18	0.782609	10	3	0	40	social science	0	22	15	7	0	0.612476	0.217391	0	324
2002	0	0	26	1	0	44	social science	0	0	0	0	1	0	1	0	0
2002	0	0	20	1	0	46	social science	0	11	3	8	1	0	0.291667	1	0
2002	6	0.3	14	3	6	47	social science	1	0	0	2	1	0.09	0.7	1	36
2002	6	1	5	3	4	16	social science	0	13	9	4	0	1	0	0	36
2002	0	0	20	1	0	34	social science	0	14	8	6	1	0	1	0	0
2002	0	0	5	1	0	6	social science	0	18	3	15	1	0	1	1	0
2002	0	0	12	1	0	39	social science	0	0	0	1	1	0	0.304348	1	0
2002	7	0.233333	23	1	0	52	social science	0	12	5	7	1	0.0544444	0.233333	1	49
2002	3	0.375	9	3	0	24	social science	0	0	1	0	1	0.140625	0.125	0	9
2002	1	0.0833333	12	4	0	26	social science	0	8	1	7	1	0.00694444	0.333333	1	1
2002	1	0.142857	12	5	0	22	social science	0	6	4	2	1	0.0204082	0.142857	0	1
2002	12	0.857143	12	4	0	32	social science	0	0	2	0	0	0.734694	0.0714286	0	144
2002	0	0	19	1	0	49	social science	0	0	0	0	1	0	1	0	0
2002	0	0	12	2	0	16	social science	1	19	2	17	1	0	1	1	0
2002	9	0.290323	16	2	6	67	social science	1	21	11	10	1	0.0842872	0.677419	0	81
2002	7	0.388889	24	3	0	64	social science	1	28	7	21	1	0.151235	0.5	1	49
2002	0	0	32	3	0	62	social science	1	44	4	40	1	0	0.388889	1	0
2002	11	0.785714	11	5	0	28	social science	1	45	23	22	0	0.617347	0.214286	0	121
2002	49	0.98	8	8	4	53	social science	1	48	33	15	0	0.9604	0.02	0	2401
2002	1	0.142857	16	2	5	80	social science	1	15	6	9	1	0.0204082	0.857143	1	1
2002	2	0.5	7	2	0	8	social science	0	0	0	5	0	0.25	0.5	1	4
2002	1	0.142857	25	1	0	32	humanities	0	20	2	18	1	0.0204082		1	1
2002	2	0.222222	18	2	0	18	social science	0	0	0	0	1	0.0493827	0.555556	0	4
2002	0	0	15	5	0	17	social science	0	0	0	0	1	0	1	0	0
2002	0	0	22	1	0	46	social science	0	0	0	0	1	0	0.909091	0	0
2002	0	0	24	1	0	39	social science	0	7	1	6	1	0	0.818182	1	0
2002	0	0	14	2	0	37	social science	1	12	2	10	1	0	0.958333	1	0
2002	0	0	15	1	0	45	social science	0	0	0	9	1	0	0.428571	1	0
2002	0	0	26	2	0	18	social science	0	0	0	0	1	0	0	0	0
2002	0	0	28	2	0	23	social science	1	0	4	0	1	0	0.166667	0	0
2002	0	0	18	2	0	25	social science	1	0	0	0	1	0	0	0	0
2002	0	0	22	1	7	33	social science	0	0	0	0	1	0	0.333333	0	0
2002	10	0.5	8	8	0	29	social science	1	6	3	3	0	0.25	0.45	0	100
2002	0	0	16	1	3	29	social science	0	0	0	0	1	0	1	0	0
2002	0	0	26	1	0	53	social science	0	0	0	1	1	0	1	1	0
2002	0	0	14	1	0	15	social science	0	0	0	0	1	0	1	0	0
2002	6	0.375	8	2	0	22	social science	1	105	60	45	1	0.140625	0.625	0	36
2002	3	0.125	32	1	0	36	social science	1	0	0	1	1	0.015625	0.875	1	9
2002	0	0	12	1	4	12	social science	1	0	0	4	1	0	1	1	0
2002	0	0	6	2	2	6	social science	1	11	1	10	1	0	1	1	0
2002	0	0	15	3	4	26	social science	0	8	3	5	1	0	1	1	0
2002	1	0.0416667	15	10	0	55	social science	1	26	4	22	1	0.00173611	0.958333	1	1
2002	10	0.5	8	3	4	20	social science	0	5	1	4	0	0.25	0.25	1	100
2002	3	0.428571	17	3	4	25	social science	0	12	6	6	1	0.183673	0.571429	0	9
2002	0	0	6	1	5	32	social science	0	0	0	1	1	0	0.916667	1	0
2002	0	0	21	2	8	11	social science	0	12	7	5	1	0	1	0	0
2002	0	0	18	1	5	43	social science	0	12	1	11	1	0	0.896552	1	0
2002	1	0.0769231	26	3	0	40	social science	1	12	3	9	1	0.00591716	0.923077	1	1
2002	3	0.103448	24	2	0	85	social science	1	0	0	1	1	0.0107015	0.827586	1	9
2002	0	0	5	2	0	15	social science	1	0	0	2	1	0	1	1	0
2002	0	0	23	3	2	33	social science	1	0	0	34	1	0	0.947368	1	0
2002	2	1	15	4	0	9	social science	1	0	0	1	0	1	0	1	4
2002	0	0	13	2	4	11	social science	1	5	1	4	1	0	0.5	1	0
2002	2	0.0740741	29	3	3	46	social science	0	31	8	23	1	0.00548697	0.62963	1	4
2002	0	0	17	1	4	23	social science	0	0	0	7	1	0	0.4	1	0
2002	0	0	44	1	0	23	humanities	0	0	0	0	1	0		0	0
2002	0	0	5	1	0	4	humanities	0	0	0	0	1	0		0	0
2002	26	0.619048	9	3	6	54	social science	1	0	4	0	0	0.38322	0.357143	0	676
2002	0	0	25	5	0	26	social science	1	52	8	44	1	0	0.875	1	0
2002	1	0.0833333	19	1	0	22	social science	0	46	14	32	1	0.00694444	0.666667	1	1
2002	1	0.1	20	1	0	21	social science	0	42	14	28	1	0.01	0.7	1	1
2002	0	0	18	2	0	63	social science	1	28	5	23	1	0	0.217391	1	0
2002	2	0.0434783	38	1	0	98	social science	0	0	0	5	1	0.00189036	0.869565	1	4
2002	0	0	12	1	3	16	social science	1	0	0	0	1	0	1	0	0
2002	4	0.190476	22	2	3	34	social science	0	0	0	0	1	0.0362812	0.380952	0	16
2002	0	0	36	2	6	14	social science	1	0	0	8	1	0	1	1	0
2002	0	0	15	3	4	33	social science	1	0	0	2	1	0	1	1	0
2002	1	0.166667	14	5	5	23	social science	1	0	0	0	1	0.0277778	0.833333	0	1
2002	0	0	17	1	2	72	social science	0	0	0	5	1	0	1	1	0
2002	0	0	18	4	0	28	social science	0	0	0	9	1	0	0.5	1	0
2002	0	0	18	2	6	22	social science	1	0	1	0	1	0	1	0	0
2002	3	0.25	9	3	2	20	social science	1	0	0	1	1	0.0625	0.75	1	9
2002	0	0	8	2	5	18	social science	0	0	0	1	1	0	0.777778	1	0
2002	1	0.1	8	2	5	15	social science	0	0	3	0	1	0.01	0.9	0	1
2002	5	0.454545	6	4	6	15	social science	1	41	32	9	1	0.206612	0.545455	0	25
2002	1	0.142857	8	2	0	14	social science	1	0	0	2	1	0.0204082	0.571429	1	1
2002	1	1	15	3	0	19	social science	0	2	1	1	0	1	0	0	1
2002	1	0.0263158	32	2	0	69	social science	0	216	40	176	1	0.000692521	0.578947	1	1
2002	9	0.45	22	1	0	88	social science	0	9	5	4	1	0.2025	0.45	0	81
2002	17	0.68	8	4	0	33	social science	1	0	0	0	0	0.4624	0.12	0	289
2002	0	0	17	1	0	25	social science	1	0	0	1	1	0	1	1	0
2002	13	0.464286	24	5	0	50	social science	1	4	1	3	1	0.215561	0.535714	1	169
2002	0	0	8	1	4	20	social science	0	0	0	0	1	0	1	0	0
2002	0	0	6	2	5	18	social science	1	0	0	2	1	0	0.866667	1	0
2002	0	0	19	3	0	20	social science	1	9	1	8	1	0	1	1	0
2002	0	0	32	2	0	26	social science	1	0	0	9	1	0	0.444444	1	0
2002	0	0	32	2	0	43	social science	1	0	0	30	1	0	0.636364	1	0
2002	0	0	27	3	0	19	social science	1	0	0	8	1	0	0.333333	1	0
2002	0	0	26	1	0	36	social science	0	0	1	0	1	0	1	0	0
2002	0	0	16	2	0	30	social science	1	23	2	21	1	0	1	1	0
2002	21	0.724138	23	3	0	43	social science	0	0	0	0	0	0.524376	0.0689655	0	441
2002	1	0.5	8	2	4	43	social science	1	29	13	16	0	0.25	0.5	1	1
2002	0	0	22	2	4	75	social science	1	60	13	47	1	0	0.9	1	0
2002	3	0.428571	12	2	6	22	social science	1	43	29	14	1	0.183673	0.571429	0	9
2002	2	0.153846	20	2	0	61	social science	1	0	0	4	1	0.0236686	0.461538	1	4
2002	4	0.222222	16	1	0	29	social science	0	33	15	18	1	0.0493827	0.0555556	1	16
2002	0	0	17	2	0	54	social science	1	6	1	5	1	0	0.263158	1	0
2002	0	0	14	1	4	18	humanities	0	0	0	0	1	0		0	0
2002	1	0.0833333	26	2	0	63	social science	1	6	1	5	1	0.00694444	0.166667	1	1
2002	2	0.142857	6	2	0	27	social science	0	12	2	10	1	0.0204082	0.571429	1	4
2002	3	0.0882353	16	1	0	46	social science	0	20	1	19	1	0.00778547	0.705882	1	9
2002	24	0.96	14	6	5	35	social science	1	91	64	27	0	0.9216	0.04	0	576
2002	1	0.05	9	1	0	36	social science	1	11	1	10	1	0.0025	0.85	1	1
2002	1	0.0666667	8	4	0	26	social science	1	0	0	0	1	0.00444444	0.866667	0	1
2002	3	0.272727	6	2	0	19	social science	1	0	2	0	1	0.0743802	0.545455	0	9
2002	0	0	18	2	0	16	social science	1	0	0	4	1	0	1	1	0
2002	0	0	17	2	0	16	social science	1	0	0	1	1	0	1	1	0
2002	14	0.538462	20	2	0	38	social science	0	31	19	12	0	0.289941	0.461538	0	196
2002	0	0	10	2	6	16	social science	1	6	2	4	1	0	0.5	1	0
2002	7	0.466667	6	3	4	26	social science	0	0	0	1	1	0.217778	0.533333	1	49
2002	18	0.9	8	4	6	47	social science	0	6	3	3	0	0.81	0.1	0	324
2002	0	0	9	4	0	72	social science	1	25	5	20	1	0	0.952381	1	0
2002	0	0	10	2	0	39	social science	1	0	0	1	1	0	1	1	0
2002	0	0	9	2	0	3	social science	1	0	0	0	1	0	0.666667	0	0
2002	0	0	17	3	7	66	social science	0	16	2	14	1	0	0	1	0
2002	0	0	15	2	3	27	social science	1	14	1	13	1	0	0.2	1	0
2002	0	0	19	3	14	31	social science	1	25	1	24	1	0	0.571429	1	0
2002	2	0.0512821	19	2	6	66	social science	0	17	2	15	1	0.00262985	0.333333	1	4
2002	0	0	17	1	8	56	social science	0	0	0	0	1	0	0	0	0
2002	0	0	9	3	0	22	social science	0	0	0	0	1	0	1	0	0
2002	1	0.2	19	3	0	43	social science	0	23	4	19	1	0.04	0.8	1	1
2002	1	0.0555556	17	9	0	48	social science	1	86	5	81	1	0.00308642	0.722222	1	1
2002	0	0	34	3	5	23	social science	1	20	1	19	1	0	0.277778	1	0
2002	9	0.9	12	2	5	48	social science	0	18	15	3	0	0.81	0.1	0	81
2002	0	0	16	2	0	44	social science	0	9	2	7	1	0	0.551724	1	0
2002	0	0	16	2	3	17	social science	1	0	0	1	1	0	0.666667	1	0
2002	4	0.0784314	19	3	0	74	social science	1	179	32	147	1	0.00615148	0.784314	1	16
2002	3	0.115385	17	1	2	53	social science	0	0	0	5	1	0.0133136	0.846154	1	9
2002	0	0	17	3	3	28	social science	1	11	1	10	1	0	0.863636	1	0
2002	0	0	12	2	0	15	social science	0	0	0	6	1	0	1	1	0
2002	2	0.181818	25	1	3	55	humanities	0	4	2	2	1	0.0330579		0	4
2002	2	0.153846	7	2	5	18	social science	0	15	7	8	1	0.0236686	0.846154	1	4
2002	1	0.0666667	10	2	0	22	social science	1	13	4	9	1	0.00444444	0.933333	1	1
2002	19	0.95	9	2	5	29	social science	0	0	0	0	0	0.9025	0.05	0	361
[truncated: 1,921 more rows]
