# Supplementary material for: Double-edged sword of interdisciplinary knowledge flow from hard sciences to humanities and social sciences: Evidence from China
Source: PLoS One. 2017 Sep 21;12(9):e0184977. doi: 10.1371/journal.pone.0184977 (PMC5608305; doi:10.1371/journal.pone.0184977)
Supplement: S3 Data — (XLSX) [file pone.0184977.s006.xlsx]

## Sheet: Sheet1
aid	ab	af	ar	au	be	bn	bp	c1	ca	cl	cr	ct	cy	de	di	dt	ef	em	ep	er	thomsonreuterswebofknowledge	fu	fx	ga	ho	id	is	j9	ji	la	ma	nr	oi	pa	pd	pg	pi	pn	pt	pu	py	ri	rp	sc	se	si	sn	so	sp
A00001	While much research has investigated the predictors of operators' performance such as personality, attitudes and motivation in high-risk industries, its cognitive antecedents and boundary conditions have not been fully investigated. Based on a multilevel investigation of 312 nuclear power plant main control room operators from 50 shift teams, the present study investigated how general mental abil…	;;Zhang, Jingyu;;Li, Yongjuan;;Wu, Changxu	e84528	;;Zhang, JY;;Li, YJ;;Wu, CX											10.1371/journal.pone.0084528	Article		changxu.wu@gmail.com		;;		;;National Basic Research Program of China [2011CB302201]; Natural;;Scientific Foundation of China [31300875, 31070915, 71371179]; Key;;Research Program of the Chinese Academy of Sciences [KJZD-EW-L04]; Youth;;Project of the Scientific Foundation of Institute of Psychology, Chinese;;Academy of Sciences [Y1CX333005]	;;This work was jointly supported by the National Basic Research Program;;of China (Grant No. 2011CB302201), the Natural Scientific Foundation of;;China (Grant No. 31300875, 31070915 and 71371179), the Key Research;;Program of the Chinese Academy of Sciences (Grant No. KJZD-EW-L04), and;;the Youth Project of the Scientific Foundation of Institute of;;Psychology, Chinese Academy of Sciences (Grant…	284MV		;;ORGANIZATIONAL CITIZENSHIP BEHAVIOR; GENERAL MENTAL-ABILITY; ACADEMIC;;SELF-CONCEPT; JOB-PERFORMANCE; WORK; METAANALYSIS; PREDICTORS;;;VARIABLES; SATISFACTION; PERSONALITY	12	PLOS ONE	PLoS One	English		54		1160 BATTERY STREET, STE 100, SAN FRANCISCO, CA 94111 USA	42004	9	SAN FRANCISCO		J	PUBLIC LIBRARY SCIENCE	2013	Wu, Changxu/H-3247-2014	Wu, CX (reprint author), Chinese Acad Sci, Inst Psychol, Beijing 100101, Peoples R China.	Science & Technology - Other Topics			1932-6203	PLOS ONE
A00002	Schizophrenia is one of the most expensive psychiatric illnesses. This study compared retrospectively health-care resources consumed 12 months before and 24 months after risperidone long-acting injection (RLAI) treatment in Hong Kong. A mirror-image analysis was conducted using data (N=191) from three public hospitals in Hong Kong from 2003 to 2007. The main outcome measure was hospitalisation co…	;;Wu, David Bin-Chia;;Lee, Edwin Ho Ming;;Chung, Wai Sau;;Chow, Danielle Pui Yu;;Lee, Vivian Wing Yan;;Wong, Ming Cheuk;;Lee, Kenneth Kwing Chin		;;Wu, DBC;;Lee, EHM;;Chung, WS;;Chow, DPY;;Lee, VWY;;Wong, MC;;Lee, KKC			745							;;Risperidone long-acting injection (RLAI); Mirror-image analysis;;;Generalised estimating equations	10.1016/j.psychres.2013.07.012	Article		kenneth.lee@monash.edu	750	;;;;		Janssen Pharmaceutical (Hong Kong)	;;This study was supported by an unrestricted educational grant from;;Janssen Pharmaceutical (Hong Kong).	285TI		;;MIRROR-IMAGE ANALYSIS; INJECTABLE RISPERIDONE; PREVENTION; RELAPSE;;;ANTIPSYCHOTICS; READMISSION; DECANOATE; DATABASE; MODELS; CARE	3	PSYCHIAT RES	Psychiatry Res.	English		26		;;ELSEVIER HOUSE, BROOKVALE PLAZA, EAST PARK SHANNON, CO, CLARE, 00000,;;IRELAND	42003	6	CLARE		J	ELSEVIER IRELAND LTD	2013	Lee, Vivian/B-9389-2008	Lee, KKC (reprint author), Monash Univ, Discipline Pharm, Sunway Campus, Subang Jaya, Selangor, Malaysia.	Psychiatry			0165-1781	PSYCHIATRY RESEARCH
A00003	Accumulated evidence suggests that Social Cognition and Interaction Training (SCIT) is associated with improved performance in social cognition and social skills in patients diagnosed with psychotic disorders. The current study examined the clinical utility of SCIT in patients with schizophrenia in Chinese community settings. Adults with stable schizophrenia were recruited from local community he…	;;Wang, Yongguang;;Roberts, David L.;;Xu, Baihua;;Cao, Rifang;;Yan, Min;;Jiang, Qiongping		;;Wang, YG;;Roberts, DL;;Xu, BH;;Cao, RF;;Yan, M;;Jiang, QP			751							;;Social Cognition and Interaction Training; Schizophrenia; Theory of;;mind; Emotion perception; Social functioning; Attributional style	10.1016/j.psychres.2013.08.038	Article		xubaihua305@126.com	755	;;;;		;;Science and Technology Bureau of HangZhou [20080333B16, 20090833B130];;;Program for Science and Technology Innovative Research Team in Zhejiang;;Province [2010R50049-08]	;;This work was supported by the Science and Technology Bureau of HangZhou;;(20080333B16; 20090833B130) and by research grants from the Program for;;Science and Technology Innovative Research Team in Zhejiang Province;;(2010R50049-08). The authors thank all the participants, especially the;;patients in the waiting-list group.	285TI		;;FACIAL AFFECT RECOGNITION; SPECTRUM DISORDERS; SCIT; IMPAIRMENTS;;;REMEDIATION; PROGRAM; MIND; PERCEPTION; DISABILITY; BEHAVIOR	3	PSYCHIAT RES	Psychiatry Res.	English		44		;;ELSEVIER HOUSE, BROOKVALE PLAZA, EAST PARK SHANNON, CO, CLARE, 00000,;;IRELAND	42003	5	CLARE		J	ELSEVIER IRELAND LTD	2013		Xu, BH (reprint author), Zhejiang Univ, Dept Psychol & Behav Sci, 148 Tianmushan Rd, Hangzhou 310028, Zhejiang, Peoples R China.	Psychiatry			0165-1781	PSYCHIATRY RESEARCH
A00004	Psychiatrists pay more attention to the social functioning outcome of schizophrenia nowadays. How to evaluate the real world function among schizophrenia is a challenging task due to culture difference, there is no such kind of instrument in terms of the Chinese setting. This study aimed to report the validation of an ecologically valid performance-based everyday functioning assessment for schizo…	;;Shi, Chuan;;He, Yi;;Cheung, Eric F. C.;;Yu, Xin;;Chan, Raymond C. K.		;;Shi, C;;He, Y;;Cheung, EFC;;Yu, X;;Chan, RCK			787							;;Everyday functioning; Schizophrenia; Negative symptom; Neurocognition;;;Recovery	10.1016/j.psychres.2013.09.023	Article		yuxin@bjmu.edu.cn; rckchan@psych.ac.cn	793	;;;;		;;Strategic Priority Research Programme (B) of the Chinese Academy of;;Sciences [XDB02030002]; National Science Fund China [81088001,;;91132701]; Project-Oriented Hundred Talents Programme [O7CX031003];;;Knowledge Innovation Project of the Chinese Academy of Sciences;;[KSCX2-EW-J-8]; National Key Project of Scientific and Technical;;Supporting Programs; Ministry of Science & Technology of China;;…	;;This study was supported by grants from the Strategic Priority Research;;Programme (B) of the Chinese Academy of Sciences (XDB02030002), the;;National Science Fund China (81088001 and 91132701), the;;Project-Oriented Hundred Talents Programme (O7CX031003), a grant from;;the Knowledge Innovation Project of the Chinese Academy of Sciences;;(KSCX2-EW-J-8), and the National Key Project of Scientifi…	285TI		;;PREMORBID ADJUSTMENT SCALE; NEGATIVE SYMPTOMS; 1ST EPISODE; SKILLS;;ASSESSMENT; MENTAL-ILLNESS; UNITED-STATES; RECOVERY; RELIABILITY;;;VERSION; DISABILITY	3	PSYCHIAT RES	Psychiatry Res.	English		63		;;ELSEVIER HOUSE, BROOKVALE PLAZA, EAST PARK SHANNON, CO, CLARE, 00000,;;IRELAND	42003	7	CLARE		J	ELSEVIER IRELAND LTD	2013		Yu, X (reprint author), Peking Univ, Inst Mental Hlth, 51 Hua Yuan Bei Rd, Beijing 100191, Peoples R China.	Psychiatry			0165-1781	PSYCHIATRY RESEARCH
A00005	Controversial results concerning insulin resistance and lipid metabolism have been reported in antipsychotic-naive first-episode psychosis (AN-FEP) patients with schizophrenia of different countries. We aimed at determining whether schizophrenia-related psychopathology was associated with insulin resistance and/or dyslipidaemia in Chinese patients with AN-FEP schizophrenia. A cross-sectional stud…	;;Chen, Song;;Broqueres-You, Dong;;Yang, Guigang;;Wang, Zhiren;;Li, Yanli;;Wang, Ning;;Zhang, Xiangyang;;Yang, Fude;;Tan, Yunlong		;;Chen, S;;Broqueres-You, D;;Yang, GG;;Wang, ZR;;Li, YL;;Wang, N;;Zhang, XY;;Yang, FD;;Tan, YL			825							;;Insulin resistance; Dyslipidaemia; Antipsychotic-naive first-episode;;psychosis schizophrenia; Psychopathology	10.1016/j.psychres.2013.08.056	Article		youdong777@gmail.com; yangfd200@126.com; yltan21@126.com	829	;;;;		;;National Key Project of Scientific and Technical Supporting Programs;;;Ministry of Science & Technology of China [2007BAI17B04]; program of;;'Hai-Ju-Gong-Cheng' of Beijing, China; Association of Lefoulon-Delalande;;of the French Institute	;;This project is supported by National Key Project of Scientific and;;Technical Supporting Programs Funded by Ministry of Science & Technology;;of China (No. 2007BAI17B04). Dr. Dong Broqueres-You is supported by the;;program of 'Hai-Ju-Gong-Cheng' of Beijing, China, and the Association of;;Lefoulon-Delalande of the French Institute.	285TI		;;NEUROTROPHIC FACTOR BDNF; METABOLIC SYNDROME; DIABETES-MELLITUS;;;CARDIOVASCULAR-DISEASE; ESTROGEN-RECEPTORS; GLUCOSE-TOLERANCE;;;HEART-DISEASE; MORTALITY; PSYCHOSIS; LEPTIN	3	PSYCHIAT RES	Psychiatry Res.	English		39		;;ELSEVIER HOUSE, BROOKVALE PLAZA, EAST PARK SHANNON, CO, CLARE, 00000,;;IRELAND	42003	5	CLARE		J	ELSEVIER IRELAND LTD	2013		Yang, FD (reprint author), Beijing HuiLongGuan Hosp, Ctr Biol Psychiat, Beijing 100906, Peoples R China.	Psychiatry			0165-1781	PSYCHIATRY RESEARCH
A00006	Although the majority of randomised controlled trials suggest that major depressive disorder (MDD, major depression) and treatment-resistant depression can be effectively treated by applying either high-(HF) or low-frequency (LF) repetitive transcranial magnetic stimulation (rTMS) to the left and right dorsolateral prefrontal cortex (DLPFC), respectively, it is not clear which rTMS approach is mo…	;;Chen, Jianjun;;Zhou, Chuanjuan;;Wu, Bo;;Wang, Ying;;Li, Qi;;Wei, Youdong;;Yang, Deyu;;Mu, Jun;;Zhu, Dan;;Zou, Dezhi;;Xie, Peng		;;Chen, JJ;;Zhou, CJ;;Wu, B;;Wang, Y;;Li, Q;;Wei, YD;;Yang, DY;;Mu, J;;Zhu, D;;Zou, DZ;;Xie, P			1260							MDD; Depression; Transcranial magnetic stimulation; TMS	10.1016/j.psychres.2013.09.007	Review		xiepeng@cqmu.edu.cn	1264	;;;;		National Basic Research Program of China (973 Program) [2009CB918300]	;;This study was supported by the National Basic Research Program of China;;(973 Program) (Grant No. 2009CB918300).	285TI		;;DORSOLATERAL PREFRONTAL CORTEX; TREATMENT-RESISTANT DEPRESSION;;;PLACEBO-CONTROLLED TRIAL; DOUBLE-BLIND; LOW-FREQUENCY;;;BRAIN-STIMULATION; DISORDER; EFFICACY; SCALE; RTMS	3	PSYCHIAT RES	Psychiatry Res.	English		33		;;ELSEVIER HOUSE, BROOKVALE PLAZA, EAST PARK SHANNON, CO, CLARE, 00000,;;IRELAND	42003	5	CLARE		J	ELSEVIER IRELAND LTD	2013		Xie, P (reprint author), Chongqing Med Univ, Affiliated Hosp 1, Dept Neurol, Chongqing 400016, Peoples R China.	Psychiatry			0165-1781	PSYCHIATRY RESEARCH
A00007	The association of seven GDNF tag SNPs with depression, heroin dependence (HD) and schizophrenia was evaluated in Chinese. An increased risk of HD and depression was associated with rs2910709 T/T genotype and rs884344 C allele, respectively, suggesting GDNF is a novel susceptibility gene for depression and HD. (C) 2013 Elsevier Ireland Ltd. All rights reserved.	;;Ma, Xian-cang;;Chen, Ce;;Zhu, Feng;;Jia, Wei;;Gao, Cheng-ge		;;Ma, XC;;Chen, C;;Zhu, F;;Jia, W;;Gao, CG			1296							Depression; Heroin; Glial cell line-derived neurotrophic factor	10.1016/j.psychres.2013.08.025	Article		zhufeng0714@gmail.com; yaogaow@163.com	1298	;;;;		National Natural Science Foundation of China [81171256]	;;The project was supported by the National Natural Science Foundation of;;China (No. 81171256).	285TI		NEUROTROPHIC FACTORS; POLYMORPHISM; DISORDER; MICE	3	PSYCHIAT RES	Psychiatry Res.	English		12		;;ELSEVIER HOUSE, BROOKVALE PLAZA, EAST PARK SHANNON, CO, CLARE, 00000,;;IRELAND	42003	3	CLARE		J	ELSEVIER IRELAND LTD	2013		Zhu, F (reprint author), Xi An Jiao Tong Univ, Affiliated Hosp 1, Ctr Translat Med, Coll Med, Xian 710049, Shaanxi, Peoples R China.	Psychiatry			0165-1781	PSYCHIATRY RESEARCH
A00008		;;Yao, Jun;;Pan, Yuqing;;Ding, Mei;;Pang, Hao;;Wang, Baojie		;;Yao, J;;Pan, YQ;;Ding, M;;Pang, H;;Wang, BJ			1324								10.1016/j.psychres.2013.08.031	Letter		bjwang@mail.cmu.edu.cn	1325	;;;;				285TI		EARLY-ONSET SCHIZOPHRENIA	3	PSYCHIAT RES	Psychiatry Res.	English		11		;;ELSEVIER HOUSE, BROOKVALE PLAZA, EAST PARK SHANNON, CO, CLARE, 00000,;;IRELAND	42003	2	CLARE		J	ELSEVIER IRELAND LTD	2013		Wang, BJ (reprint author), China Med Univ, Inst Forens Med, Shenyang 110001, Peoples R China.	Psychiatry			0165-1781	PSYCHIATRY RESEARCH
A00009	;;Objective: By testing the mediating effect of coping strategies on the relationship between social support (SS) and posttraumatic growth (PTG), the aim of this research was to develop a new approach for the study of post-disaster psychological intervention.;;Methods: A mediating effect model analysis was conducted on 2080 adult survivors selected from 19 of the counties hardest-hit by the 2008 …	;;He, Lili;;Xu, Jiuping;;Wu, Zhibin	e84164	;;He, LL;;Xu, JP;;Wu, ZB											10.1371/journal.pone.0084164	Article		xujiuping@scu.edu.cn		;;;;		;;National Social Science Foundation of China [12 ZD217]; Sichuan;;Provincial Social Science Foundation of China [SC13ZD06]; Sichuan;;University [SKG2013001]	;;This research was supported by the Major Bidding Program of the National;;Social Science Foundation of China (Grant No. 12 & ZD217), Sichuan;;Provincial Social Science Foundation of China (Grant No. SC13ZD06), and;;the research funding of Sichuan University (Grant No. SKG2013001). The;;funders had no role in study design, data collection and analysis,;;decision to publish, or preparation of the…	281RE		2-COMPONENT MODEL; SOCIAL SUPPORT; CANCER; INVENTORY; STRESS; TRAUMA	12	PLOS ONE	PLoS One	English		47		1160 BATTERY STREET, STE 100, SAN FRANCISCO, CA 94111 USA	42000	7	SAN FRANCISCO		J	PUBLIC LIBRARY SCIENCE	2013		Xu, JP (reprint author), Sichuan Univ, Uncertainty Decis Making Lab, Chengdu 610064, Peoples R China.	Science & Technology - Other Topics			1932-6203	PLOS ONE
A00010	;;Background: Nursing has a high risk of job burnout, but only a few studies have explored its influencing factors from an organizational perspective.;;Objective: The present study explores the impact of psychological capital on job burnout by investigating the mediating effect of organizational commitment on this relationship.;;Methods: A total of 473 female nurses from four large general hospit…	;;Peng, Jiaxi;;Jiang, Xihua;;Zhang, Jiaxi;;Xiao, Runxuan;;Song, Yunyun;;Feng, Xi;;Zhang, Yan;;Miao, Danmin	e84193	;;Peng, JX;;Jiang, XH;;Zhang, JX;;Xiao, RX;;Song, YY;;Feng, X;;Zhang, Y;;Miao, DM											10.1371/journal.pone.0084193	Article		zhangyanfmmu@126.com; miaodamin@hotmail.com		;;;;				281RE		PERFORMANCE; RESOURCES; MODELS; WORK; HOPE	12	PLOS ONE	PLoS One	English		49		1160 BATTERY STREET, STE 100, SAN FRANCISCO, CA 94111 USA	42000	7	SAN FRANCISCO		J	PUBLIC LIBRARY SCIENCE	2013		Zhang, Y (reprint author), Fourth Mil Med Univ, Dept Psychol, Xian, Peoples R China.	Science & Technology - Other Topics			1932-6203	PLOS ONE
A00011	;;Background: Dysthymia is a form of chronic mild depression that has a complex relationship with major depressive disorder (MDD). Here we investigate the role of environmental risk factors, including stressful life events and parenting style, in patients with both MDD and dysthymia. We ask whether these risk factors act in the same way in MDD with and without dysthymia.;;Results: We examined the…	;;Wu, Wenqing;;Wang, Zhoubing;;Wei, Yan;;Zhang, Guanghua;;Shi, Shenxun;;Gao, Jingfang;;Li, Youhui;;Tao, Ming;;Zhang, Kerang;;Wang, Xumei;;Gao, Chengge;;Yang, Lijun;;Li, Kan;;Shi, Jianguo;;Wang, Gang;;Liu, Lanfen;;Zhang, Jinbei;;Du, Bo;;Jiang, Guoqing;;Shen, Jianhua;;Liu, Ying;;Liang, Wei;;Sun, Jing;;Hu, Jian;;Liu, Tiebang;;Wang, Xueyi;;Miao, Guodong;;Meng, Huaqing;;Li, Yi;;Hu, Chunmei;;Li, Yi;;Hu…	e83490	;;Wu, WQ;;Wang, ZB;;Wei, Y;;Zhang, GH;;Shi, SX;;Gao, JF;;Li, YH;;Tao, M;;Zhang, KR;;Wang, XM;;Gao, CG;;Yang, LJ;;Li, K;;Shi, JG;;Wang, G;;Liu, LF;;Zhang, JB;;Du, B;;Jiang, GQ;;Shen, JH;;Liu, Y;;Liang, W;;Sun, J;;Hu, J;;Liu, TB;;Wang, XY;;Miao, GD;;Meng, HQ;;Li, Y;;Hu, CM;;Li, Y;;Huang, GP;;Li, GY;;Ha, BW;;Deng, H;;Mei, QY;;Zhong, H;;Gao, SG;;Sang, H;;Zhang, YT;;Fang, X;;Yu, FY;;Yang, DL;;Liu, TQ;…											10.1371/journal.pone.0083490	Article		jf@well.ox.ac.uk; zhangzhen601020@126.com		;;;;		Wellcome Trust [090532/Z/09/Z, 083573/Z/07/Z, 089269/Z/09/Z]	;;This study was funded by the Wellcome Trust (090532/Z/09/Z,;;083573/Z/07/Z, 089269/Z/09/Z) (http://www.wellcome.ac.uk/). The funders;;had no role in study design, data collection and analysis, decision to;;publish, or preparation of the manuscript.	281RE		;;EARLY-ONSET DYSTHYMIA; PERSONALITY-DISORDERS; SEXUAL-ABUSE; LIFE EVENTS;;;SHORT-TERM; COMORBIDITY; CHRONICITY; OUTPATIENTS; FAMILY; MOOD	12	PLOS ONE	PLoS One	English		33		1160 BATTERY STREET, STE 100, SAN FRANCISCO, CA 94111 USA	42000	7	SAN FRANCISCO		J	PUBLIC LIBRARY SCIENCE	2013		Flint, J (reprint author), Wellcome Trust Ctr Human Genet, Oxford, England.	Science & Technology - Other Topics			1932-6203	PLOS ONE
A00012	Individuals have different levels of stress sensitivity. An individual's predisposition to experience negative life events (NLEs) may make him/ her more vulnerable to a series of psychopathological and physical diseases. However, the neuroanatomical correlates of individual differences in sensitivity to NLEs remain unknown. In this study, voxel-based morphometry was used to identify the gray matt…	;;Qiao, L.;;Wei, D. T.;;Li, W. F.;;Chen, Q. L.;;Che, X. W.;;Li, B. B.;;Li, Y. D.;;Qiu, J.;;Zhang, Q. L.;;Liu, Y. J.		;;Qiao, L;;Wei, DT;;Li, WF;;Chen, QL;;Che, XW;;Li, BB;;Li, YD;;Qiu, J;;Zhang, QL;;Liu, YJ			255							;;individual differences; frontal operculum; stress sensitivity; coping;;style	10.1016/j.neuroscience.2013.09.053	Article		qiuj318@swu.edu.cn; zhangql@swu.edu.cn	264	;;;;		;;National Natural Science Foundation of China [31070900, 30970892,;;31170983]; Program for New Century Excellent Talents in University;;;Ministry of Education; Fundamental Research Funds for the Central;;Universities [SWU1209101]; China Postdoctoral Science Foundation;;[2012M510098]; Research Funds for Southwest University [SWU09103]; Key;;Discipline Fund of National 211 Project [NSKD11007]; pos…	;;We thank the participants, the experimenters for the ongoing project,;;and all our other colleagues for their support. The study was supported;;by the National Natural Science Foundation of China (31070900; 30970892;;;31170983), the Program for New Century Excellent Talents in University;;(2011) by the Ministry of Education, the Fundamental Research Funds for;;the Central Universities (SWU12091…	302GR		;;POSTTRAUMATIC-STRESS-DISORDER; MAJOR DEPRESSION; GENETIC LIABILITY;;;PERSEVERATIVE COGNITION; INTEROCEPTIVE AWARENESS;;;INDIVIDUAL-DIFFERENCES; EMOTIONAL EXPERIENCE; ANTERIOR INSULA;;;MENTAL-HEALTH; SELF-REPORT		NEUROSCIENCE	Neuroscience	English		75		THE BOULEVARD, LANGFORD LANE, KIDLINGTON, OXFORD OX5 1GB, ENGLAND	41999	10	OXFORD		J	PERGAMON-ELSEVIER SCIENCE LTD	2013		Qiu, J (reprint author), Southwest Univ, Dept Psychol, Chongqing 400715, Peoples R China.	Neurosciences & Neurology			0306-4522	NEUROSCIENCE
A00013	;;Background: In the past three years, the Government of China initiated health reform with rural public health system construction to achieve equal access to public health services for rural residents. The study assessed trends of public health services accessibility in rural China from 2008 to 2010, as well as the current situation about the China's rural public health system performance.;;Meth…	;;Tian, Miaomiao;;Feng, Da;;Chen, Xi;;Chen, Yingchun;;Sun, Xi;;Xiang, Yuanxi;;Yuan, Fang;;Feng, Zhanchun	e83822	;;Tian, MM;;Feng, D;;Chen, X;;Chen, YC;;Sun, X;;Xiang, YX;;Yuan, F;;Feng, ZC											10.1371/journal.pone.0083822	Article		zcfeng@mails.tjmu.edu.com		;;;;		National Natural Science Foundation of China [70973042]	;;The study was funded by the National Natural Science Foundation of China;;(Program No: 70973042). The funders had no role in study design, data;;collection and analysis, decision to publish, or preparation of the;;manuscript.	281QS		REFORM; STANDARDS; VALIDITY	12	PLOS ONE	PLoS One	English		36		1160 BATTERY STREET, STE 100, SAN FRANCISCO, CA 94111 USA	41999	10	SAN FRANCISCO		J	PUBLIC LIBRARY SCIENCE	2013		Feng, ZC (reprint author), Huazhong Univ Sci & Technol, Sch Med & Hlth Management, Wuhan 430074, Hubei, Peoples R China.	Science & Technology - Other Topics			1932-6203	PLOS ONE
A00014	We explored the mediation effect of caregiver self-efficacy on the influences of behavioral and psychological symptoms (BPSD) of dementia care recipients (CRs) or family caregivers' (CGs) social supports (informational, tangible and affectionate support and positive social interaction) on CGs' mental health. We interviewed 196 CGs, using a battery of measures including demographic data of the dya…	;;Zhang, Shuying;;Edwards, Helen;;Yates, Patsy;;Guo, Qihao;;Li, Chunbo	e83326	;;Zhang, SY;;Edwards, H;;Yates, P;;Guo, QH;;Li, CB											10.1371/journal.pone.0083326	Article		dr.guoqihao@126.com		;;;;		National Natural Science Foundation of China [81171019]	;;The data analysis and preparation of this manuscript were funded by the;;National Natural Science Foundation of China (ID: 81171019). The funders;;had no role in study design, data collection and analysis, decision to;;publish, or preparation of the manuscript.	281QS		;;DEVELOPING-COUNTRIES; DEPRESSIVE SYMPTOMS; ALZHEIMERS-DISEASE; PHYSICAL;;HEALTH; STRESS PROCESS; QUESTIONNAIRE; VALIDATION; SUPPORT; PEOPLE;;;SAMPLE	12	PLOS ONE	PLoS One	English		35		1160 BATTERY STREET, STE 100, SAN FRANCISCO, CA 94111 USA	41999	7	SAN FRANCISCO		J	PUBLIC LIBRARY SCIENCE	2013		Guo, QH (reprint author), Fudan Univ, Dept Neurol, Shanghai 200433, Peoples R China.	Science & Technology - Other Topics			1932-6203	PLOS ONE
A00015		Qian, Ge		Qian, G			1666									Editorial Material		qiange@mail.shufe.edu.cn	1667	;;;;				294IB			12	CURR SCI INDIA	Curr. Sci.	English		4		C V RAMAN AVENUE, SADASHIVANAGAR, P B #8005, BANGALORE 560 080, INDIA	41998	2	BANGALORE		J	INDIAN ACAD SCIENCES	2013		Qian, G (reprint author), Shanghai Univ Finance & Econ, Humanities Coll, Theoret Teaching & Res Dept, Shanghai 200433, Peoples R China.	Science & Technology - Other Topics			0011-3891	CURRENT SCIENCE
A00016	;;Background: There is limited evidence to support the use of facemasks in preventing infection for primary care professionals. Negative effects on communication has been suggested when the physician wears a facemask. As communication skills and doctor patient relationship are essential to primary care consultations, the effects of doctor's facemask wearing were explored.;;Method: A randomised co…	;;Wong, Carmen Ka Man;;Yip, Benjamin Hon Kei;;Mercer, Stewart;;Griffiths, Sian;;Kung, Kenny;;Wong, Martin Chi-sang;;Chor, Josette;;Wong, Samuel Yeung-shan	200	;;Wong, CKM;;Yip, BHK;;Mercer, S;;Griffiths, S;;Kung, K;;Wong, MCS;;Chor, J;;Wong, SYS										;;Public health; Primary health care; General practice; Continuity of;;patient care; Empathy	10.1186/1471-2296-14-200	Article		benyip@cuhk.edu.hk		;;;;		;;Research Committee Direct Grant for Research, The Chinese University of;;Hong Kong [2010.2.066]	;;This study was funded by the Research Committee Direct Grant for;;Research, The Chinese University of Hong Kong. Reference number:;;2010.2.066. URL: http://www.cuhk.edu.hk/rao/about_rao.html. The funder;;had no role in study design, data collection and analysis, decision to;;publish, or preparation of the manuscript.	287FP		;;GENERAL-PRACTICE CONSULTATIONS; DOCTOR-PATIENT COMMUNICATION;;;NONVERBAL-COMMUNICATION; SOCIOECONOMIC DEPRIVATION; PRACTITIONER;;EMPATHY; PHYSICIAN EMPATHY; CHINESE-VERSION; HEALTH OUTCOMES; CENTERED;;CARE; FACE MASKS		BMC FAM PRACT	BMC Fam. Pract.	English		37		236 GRAYS INN RD, FLOOR 6, LONDON WC1X 8HL, ENGLAND	41997	7	LONDON		J	BIOMED CENTRAL LTD	2013	Wong, Martin/L-4568-2014	Yip, BHK (reprint author), Chinese Univ Hong Kong, Prince Wales Hosp, JC Sch Publ Hlth & Primary Care, 4-F Sch Publ Hlth Bldg, Shatin, Hong Kong, Peoples R China.	General & Internal Medicine			1471-2296	BMC FAMILY PRACTICE
A00017	When individuals' actions are incongruent with those of the group they belong to, they may change their initial behavior in order to conform to the group norm. This phenomenon is known as "social conformity." In the present study, we used event-related functional magnetic resonance imaging (fMRI) to investigate brain activity in response to group opinion during an ultimatum game. Results showed t…	;;Wei, Zhenyu;;Zhao, Zhiying;;Zheng, Yong	896	;;Wei, ZY;;Zhao, ZY;;Zheng, Y										;;social conformity; behavioral change; ultimatum game; unfair treatment;;;fMRI	10.3389/fnhum.2013.00896	Article		zhengy@swu.edu.cn		;;;;				283JM		;;MEDIAL FRONTAL-CORTEX; COGNITIVE CONTROL; PREDICTION ERRORS; VIOLATIONS;;;INSIGHTS; BEHAVIOR; REWARD; BRAIN; WELL		FRONT HUM NEUROSCI	Front. Hum. Neurosci.	English		41		PO BOX 110, LAUSANNE, 1015, SWITZERLAND	41997	7	LAUSANNE		J	FRONTIERS RESEARCH FOUNDATION	2013		Zheng, Y (reprint author), Southwest Univ, Key Lab Cognit & Personal, Minist Educ, Sch Psychol, Tiansheng Rd, Chongqing 400715, Peoples R China.	Neurosciences & Neurology; Psychology			1662-5161	FRONTIERS IN HUMAN NEUROSCIENCE
A00018	;;Introduction: Females having a longer telomere and lifespan than males have been documented in many animals. Such linkage however has never been reported in fish. Progressive shortening of telomere length is an important aging mechanism. Mounting in vitro evidence has shown that telomere shortening beyond a critical length triggered replicative senescence or cell death. Estrogen has been postul…	;;Gopalakrishnan, Singaram;;Cheung, Napo K. M.;;Yip, Bill W. P.;;Au, Doris W. T.		;;Gopalakrishnan, S;;Cheung, NKM;;Yip, BWP;;Au, DWT										;;Lifespan; Aging; Telomerase and telomere; Estrogen profile; Sex;;difference and medaka O. latipes	10.1186/1742-9994-10-78	Article		bhdwtau@cityu.edu.hk		;;;;		;;Research Grants Council of the Hong Kong Special Administrative Region,;;China [9041468, CityU 160009]; University Grants Committee, Area of;;Excellence Grant [AoE/P-04/04]; State Key Laboratory in Marine Pollution	;;The work described in this paper was supported by grants from the;;Research Grants Council of the Hong Kong Special Administrative Region,;;China (Project No. 9041468; CityU 160009), the University Grants;;Committee, Area of Excellence Grant (AoE/P-04/04) and the State Key;;Laboratory in Marine Pollution. The authors greatly appreciated Jun Bo,;;Roy R. Ye, Andy C. K. Cheung and Hong-Lin Ren for…	287EJ		;;GAMBUSIA-HOLBROOKI PISCES; LIFE-HISTORY; LIVE LONGER;;;DROSOPHILA-MELANOGASTER; HTERT EXPRESSION; IN-VITRO; AGE; POPULATION;;;MECHANISMS; CELLS		FRONT ZOOL	Front. Zool.	English		70		236 GRAYS INN RD, FLOOR 6, LONDON WC1X 8HL, ENGLAND	41996	11	LONDON		J	BIOMED CENTRAL LTD	2013		Au, DWT (reprint author), City Univ Hong Kong, Dept Biol & Chem, State Key Lab Marine Pollut, 83 Tat Chee Ave, Kowloon, Hong Kong, Peoples R China.	Zoology			1742-9994	FRONTIERS IN ZOOLOGY
A00019	;;Background: Because the movement of stock prices is not only ubiquitous in financial markets but also crucial for investors, extensive studies have been done to understand the law behind it. In particular, since the financial crisis in 2008, researchers have a more interest in investigating large market volatilities in order to grasp changing market trends.;;Methodology/Principal Findings: In t…	;;Liu, Lu;;Wei, Jianrong;;Huang, Jiping	e82771	;;Liu, L;;Wei, JR;;Huang, JP											10.1371/journal.pone.0082771	Article		jphuang@fudan.edu.cn		;;;;		;;National Natural Science Foundation of China [11075035, 11222544]; Fok;;Ying Tung Education Foundation [131008]; Program for New Century;;Excellent Talents in University [NCET-12-0121]; Shanghai Rising-Star;;Program [12QA1400200]; Chinese National Key Basic Research Special Fund;;[2011CB922004]	;;This work is supported by the National Natural Science Foundation of;;China under Grant Nos. 11075035 and 11222544 (http://www.nsfc.gov.cn/),;;by the Fok Ying Tung Education Foundation under Grant No. 131008;;(http://www.moe.edu.cn/), by the Program for New Century Excellent;;Talents in University (NCET-12-0121) (http://www.moe.edu.cn/), by the;;Shanghai Rising-Star Program (No. 12QA1400200);;(…	278IG		TECHNICAL ANALYSIS; MARKET PRICES; BEHAVIOR; DISTRIBUTIONS; RETURNS	12	PLOS ONE	PLoS One	English		31		1160 BATTERY STREET, STE 100, SAN FRANCISCO, CA 94111 USA	41996	6	SAN FRANCISCO		J	PUBLIC LIBRARY SCIENCE	2013		Huang, JP (reprint author), Fudan Univ, Dept Phys, Shanghai 200433, Peoples R China.	Science & Technology - Other Topics			1932-6203	PLOS ONE
A00020	;;Background: Prior to 1970, coal mining technology and prevention measures in China were poor. Mechanized coal mining equipment and advanced protection measures were continuously installed in the mines after 1970. All these improvements may have resulted in a change in the incidence of coal workers' pneumoconiosis (CWP). Therefore, it is important to identify the characteristics of CWP today and…	;;Shen, Fuhai;;Yuan, Juxiang;;Sun, Zhiqian;;Hua, Zhengbing;;Qin, Tianbang;;Yao, Sanqiao;;Fan, Xueyun;;Chen, Weihong;;Liu, Hongbo;;Chen, Jie	e82181	;;Shen, FH;;Yuan, JX;;Sun, ZQ;;Hua, ZB;;Qin, TB;;Yao, SQ;;Fan, XY;;Chen, WH;;Liu, HB;;Chen, J											10.1371/journal.pone.0082181	Article		chenjie@mail.cmu.edu.cn		;;;;		National Natural Science Foundation of China [71073176]	;;This study was supported by the National Natural Science Foundation of;;China (number 71073176). The funders had no role in study design, data;;collection and analysis, decision to publish, or preparation of the;;manuscript.	278IG		;;ARTIFICIAL NEURAL-NETWORKS; MINERS PNEUMOCONIOSIS; PREVALENCE; DUST;;;SILICOSIS; EXPOSURE; CANCER; STATES; SURVEILLANCE; MORTALITY	12	PLOS ONE	PLoS One	English		49		1160 BATTERY STREET, STE 100, SAN FRANCISCO, CA 94111 USA	41996	8	SAN FRANCISCO		J	PUBLIC LIBRARY SCIENCE	2013		Chen, J (reprint author), China Med Univ, Sch Publ Hlth, Shenyang, Liaoning, Peoples R China.	Science & Technology - Other Topics			1932-6203	PLOS ONE
A00021	;;Background: Zheng represents pattern differentiation in Traditional Chinese Medicine (TCM), as the basic unit and a key concept in TCM therapeutic theory, is based on the physiology and pathology of TCM. None of the outcome measurements of atopic dermatitis (AD) are Zheng-specific. The effectiveness of TCM is likely to be underestimated without a Zheng-related symptom-specific instrument. The a…	;;Wu, Darong;;Huang, Chujun;;Mo, Xiumei;;Liu, Junfeng;;Cai, Jianxiong;;Liu, Chi;;Zhu, Haili;;Li, Hongyi;;Chen, Dacan	212	;;Wu, DR;;Huang, CJ;;Mo, XM;;Liu, JF;;Cai, JX;;Liu, C;;Zhu, HL;;Li, HY;;Chen, DC										;;Atopic dermatitis; Development; Questionnaire; Traditional Chinese;;medicine; Validation; Symptom	10.1186/1477-7525-11-212	Article		4910702@163.com		;;;;		;;National Technology Supporting Program [2007BA120B048]; National Basic;;Research Program of China [2011CB505404]; Scientific Research Project of;;Public Welfare Industry, State Administration of Traditional Chinese;;Medicine of P. R. of China [200707004]; Science and Technology Planning;;Project of Guangdong Province, China [2011B031700077]	;;This study is partly supported by National Technology Supporting Program;;during the 11th Five-Year Plan Period(2007BA120B048), National Basic;;Research Program of China (2011CB505404); Scientific Research Project of;;Public Welfare Industry, State Administration of Traditional Chinese;;Medicine of P. R. of China (No. 200707004); Science and Technology;;Planning Project of Guangdong Province, C…	295KP		SEVERITY; ECZEMA; EFFICACY; INDEX		HEALTH QUAL LIFE OUT	Health Qual. Life Outcomes	English		23		236 GRAYS INN RD, FLOOR 6, LONDON WC1X 8HL, ENGLAND	41994	9	LONDON		J	BIOMED CENTRAL LTD	2013		Chen, DC (reprint author), Guangzhou Univ Chinese Med, Affiliated Hosp 2, 111 Dade Rd,POB 510120, Guangzhou, Guangdong, Peoples R China.	Health Care Sciences & Services			1477-7525	HEALTH AND QUALITY OF LIFE OUTCOMES
A00022		;;Chalkidou, Kalipso;;Marten, Robert;;Cutler, Derek;;Culyer, Tony;;Smith, Richard;;Teerawattananon, Yot;;Cluzeau, Francoise;;Li, Ryan;;Sullivan, Richard;;Huang, Yanzhong;;Fan, Victoria;;Glassman, Amanda;;Yu Dezhi;;Gyansa-Lutterodt, Martha;;McPherson, Sam;;Gadelha, Carlos;;Sundararaman, Thiagarajan;;Squires, Neil;;Daulaire, Nils;;Sadanandan, Rajeev;;Shiro, Konuma;;Lemgruber, Alexandre		;;Chalkidou, K;;Marten, R;;Cutler, D;;Culyer, T;;Smith, R;;Teerawattananon, Y;;Cluzeau, F;;Li, R;;Sullivan, R;;Huang, YZ;;Fan, V;;Glassman, A;;Yu, DZ;;Gyansa-Lutterodt, M;;McPherson, S;;Gadelha, C;;Sundararaman, T;;Squires, N;;Daulaire, N;;Sadanandan, R;;Shiro, K;;Lemgruber, A			E48									Editorial Material		kalipso.chalkidou@gmail.com	E49	;;;;				275OX			9910	LANCET	Lancet	English		9		360 PARK AVE SOUTH, NEW YORK, NY 10010-1710 USA	41994	2	NEW YORK		J	ELSEVIER SCIENCE INC	2013		Chalkidou, K (reprint author), NICE, London SW1A 2BU, England.	General & Internal Medicine			0140-6736	LANCET
A00023	;;Background: Metabolic functions may operate as important biophysiological mechanisms through which social relationships affect health. It is unclear how social embeddedness or the lack thereof is related to risk of metabolic dysregulation. To fill this gap we tested the effects of social integration on metabolic functions over time in a nationally representative sample of older adults in the Un…	;;Yang, Yang Claire;;Li, Ting;;Ji, Yinchun	1210	;;Yang, YC;;Li, T;;Ji, YC										;;Social integration; Social network size; Metabolic functions; Total;;cholesterol; High-density lipoprotein cholesterol; Glycosylated;;hemoglobin; Waist circumference; Blood pressure; Older adults	10.1186/1471-2458-13-1210	Article		yangy@unc.edu		;;;;		;;National Institute on Aging [K01AG036745]; University Cancer Research;;Funds at the Lineberger Comprehensive Cancer Center; University of North;;Carolina at Chapel Hill; Carolina Population Center [R24 HD050924]	;;We thank Kenneth Bollen for advice on the latent growth curve model;;specification used in the analysis and Kathleen Mullan Harris for;;various substantive comments related to the biomarker data in;;population-based studies. The research was supported by grant #;;K01AG036745 from the National Institute on Aging, awarded to the first;;author, and the University Cancer Research Funds at the Lineb…	AA7MT		;;CORONARY-HEART-DISEASE; CUMULATIVE BIOLOGICAL RISK; CAUSE-SPECIFIC;;MORTALITY; CARDIOVASCULAR-DISEASE; UNDERLYING MECHANISMS; ALLOSTATIC;;LOAD; SEX-DIFFERENCES; UNITED-STATES; SUPPORT; HEALTH		BMC PUBLIC HEALTH	BMC Public Health	English		45		236 GRAYS INN RD, FLOOR 6, LONDON WC1X 8HL, ENGLAND	41993	11	LONDON		J	BIOMED CENTRAL LTD	2013		Yang, YC (reprint author), Lineberger Comprehens Canc Ctr, Dept Sociol, Chapel Hill, NC 27517 USA.	Public, Environmental & Occupational Health			1471-2458	BMC PUBLIC HEALTH
A00024	;;Patient-reported outcomes (PROs) play an increasingly important role in clinical practice and research. Modern psychometric methods such as item response theory (IRT) enable the creation of item banks that support fixed-length forms as well as computerized adaptive testing (CAT), often resulting in improved measurement precision and responsiveness. Here we describe and discuss the case for deve…	;;Alonso, Jordi;;Bartlett, Susan J.;;Rose, Matthias;;Aaronson, Neil K.;;Chaplin, John E.;;Efficace, Fabio;;Leplege, Alain;;Lu, Aiping;;Tulsky, David S.;;Raat, Hein;;Ravens-Sieberer, Ulrike;;Revicki, Dennis;;Terwee, Caroline B.;;Valderas, Jose M.;;Cella, David;;Forrest, Christopher B.	210	;;Alonso, J;;Bartlett, SJ;;Rose, M;;Aaronson, NK;;Chaplin, JE;;Efficace, F;;Leplege, A;;Lu, AP;;Tulsky, DS;;Raat, H;;Ravens-Sieberer, U;;Revicki, D;;Terwee, CB;;Valderas, JM;;Cella, D;;Forrest, CB					PROMIS Int Grp					;;Patient-reported outcomes; Health-related quality of life research;;;Patients' experiences; Questionnaires; Cross-cultural equivalence;;;Health information systems; Clinical decision making; Comparative;;effectiveness research; Patient empowerment; Cross-national comparisons	10.1186/1477-7525-11-210	Article		jalonso@imim.es; FORRESTC@email.chop.edu		;;;;				295KN		HEALTH-STATUS QUESTIONNAIRES; QUALITY		HEALTH QUAL LIFE OUT	Health Qual. Life Outcomes	English		11	Alonso, Jordi/0000-0001-8627-9636; Valderas, Jose/0000-0002-9299-1555	236 GRAYS INN RD, FLOOR 6, LONDON WC1X 8HL, ENGLAND	41993	5	LONDON		J	BIOMED CENTRAL LTD	2013	Alonso, Jordi/A-5514-2010; Valderas, Jose/G-7967-2014	Alonso, J (reprint author), IMIM Inst Hosp Mar Invest Med, Hlth Serv Res Unit, Barcelona, Spain.	Health Care Sciences & Services			1477-7525	HEALTH AND QUALITY OF LIFE OUTCOMES
A00025		Xie, X. Sunney		Xie, XS			1457								10.1126/science.1248859	Editorial Material		xie@chemistry.harvard.edu	1459	;;;;				274ZI		MOLECULES; DYNAMICS	6165	SCIENCE	Science	English		14		1200 NEW YORK AVE, NW, WASHINGTON, DC 20005 USA	41993	3	WASHINGTON		J	AMER ASSOC ADVANCEMENT SCIENCE	2013		Xie, XS (reprint author), Harvard Univ, Dept Chem & Chem Biol, Cambridge, MA 02138 USA.	Science & Technology - Other Topics			0036-8075	SCIENCE
A00026	Obesity is a major concern in the aging population and degrades health, motor functions and cognition in older adults. The effects of obesity are pervasive and challenging to health-care systems, making this a widespread and critically important public health dilemma. In this review, we examine the relationship between obesity, cognitive aging, and related dysfunctions. Potential neural mechanism…	;;Chan, John S. Y.;;Yan, Jin H.;;Payne, V. Gregory		;;Chan, JSY;;Yan, JH;;Payne, VG										;;aging; exercise; functionality; neural mechanisms; overweight;;;well-being	10.3389/fnagi.2013.00097	Review		jin.yan@sjsu.edu		;;;;		Neuro-Academics Ltd., Hong Kong	This study was supported in part by the Neuro-Academics Ltd., Hong Kong.	282OQ		;;BODY-MASS INDEX; WHITE-MATTER INTEGRITY; QUALITY-OF-LIFE;;;PHYSICAL-ACTIVITY; OLDER-ADULTS; POSTMENOPAUSAL WOMEN;;;ALZHEIMERS-DISEASE; AEROBIC FITNESS; BRAIN VOLUME; RESISTANCE EXERCISE		FRONT AGING NEUROSCI	Front. Aging Neurosci.	English		118		PO BOX 110, LAUSANNE, 1015, SWITZERLAND	41993	8	LAUSANNE		J	FRONTIERS RESEARCH FOUNDATION	2013		Yan, JH (reprint author), Shenzhen Univ, Inst Affect & Social Neurosci, 3688 Nanhai Ave, Shenzhen 518060, Peoples R China.	Geriatrics & Gerontology; Neurosciences & Neurology			1663-4365	FRONTIERS IN AGING NEUROSCIENCE
A00027	;;Background: Despite strong recommendations to involve family social support in hypertension control, few questionnaires have been designed to measure family support in Chinese patients. The Chinese Family Support Scale is a self-rated questionnaire that assesses family support over a 6-month period.;;Methods: A total of 282 patients with hypertension participated in this study and 136 of them c…	;;Li, Gang;;Hu, Huanhuan;;Dong, Zhong;;Arao, Takashi	e85682	;;Li, G;;Hu, HH;;Dong, Z;;Arao, T											10.1371/journal.pone.0085682	Article		tarao@waseda.jp		;;;;		GCOE in Waseda University	;;This research was supported by grant of GCOE in Waseda University;;(http://www.sport-sciences-gcoe-waseda.jp). The funders had no role in;;study design, data collection and analysis, decision to publish, or;;preparation of the manuscript.	276IX		;;SOCIAL SUPPORT; DEPRESSIVE SYMPTOMS; HOSPITAL ANXIETY; OLDER-ADULTS;;;HEALTH; DISEASE; INTERVENTIONS; PREVENTION; MANAGEMENT; VERSION	12	PLOS ONE	PLoS One	English		42		1160 BATTERY STREET, STE 100, SAN FRANCISCO, CA 94111 USA	41993	7	SAN FRANCISCO		J	PUBLIC LIBRARY SCIENCE	2013		Arao, T (reprint author), Waseda Univ, Fac Sport Sci, Lab Exercise Epidemiol, Tokorozawa, Saitama, Japan.	Science & Technology - Other Topics			1932-6203	PLOS ONE
A00028	To investigate perceptual and neural correlates of future self-appraisals as a function of temporal distance, event-related potentials (ERPs) were recorded while participants (11 women, eight men) made judgments about the applicability of trait adjectives to their near future selves (i.e., one month from now) and their distant future selves (i.e., three years from now). Behavioral results indicat…	;;Luo, Yangmei;;Jackson, Todd;;Wang, Xiaogang;;Huang, Xiting	e84332	;;Luo, YM;;Jackson, T;;Wang, XG;;Huang, XT											10.1371/journal.pone.0084332	Article		xthuang@swu.edu.cn		;;;;		;;Fundamental Research Funds for the Central Universities [SWU1209469];;;National 211 Project, China [NSKD11001]; Faculty of Psychology in;;Southwest University [TR201201-1]	;;This study was supported by "the Fundamental Research Funds for the;;Central Universities" (SWU1209469) to the first author, the Key;;Discipline Fund of the National 211 Project, China (NSKD11001), and the;;Research Team's Construction Project from the Faculty of Psychology in;;Southwest University (2012) "The Mechanism and Application of;;Range-Synthesis Model of Time" (TR201201-1) to the corr…	276IX		;;NEGATIVITY BIAS; ERP; TIME; ANTICIPATION; EXPERIENCES; OPTIMISM;;;THINKING; STIMULI; OTHERS; SELVES	12	PLOS ONE	PLoS One	English		42		1160 BATTERY STREET, STE 100, SAN FRANCISCO, CA 94111 USA	41993	6	SAN FRANCISCO		J	PUBLIC LIBRARY SCIENCE	2013		Huang, XT (reprint author), China Minist Educ, Key Lab Cognit & Personal SWU, Chongqing, Peoples R China.	Science & Technology - Other Topics			1932-6203	PLOS ONE
A00029	Using Garner's speeded classification task existing studies demonstrated an asymmetric interference in the recognition of facial identity and facial expression. It seems that expression is hard to interfere with identity recognition. However, discriminability of identity and expression, a potential confounding variable, had not been carefully examined in existing studies. In current work, we mani…	;;Wang, Yamin;;Fu, Xiaolan;;Johnston, Robert A.;;Yan, Zheng	943	;;Wang, YM;;Fu, XL;;Johnston, RA;;Yan, Z										;;discriminability; Garner interference; facial recognition; facial;;identity recognition; facial expression recognition	10.3389/fpsyg.2013.00943	Article		wangym@cnu.edu.cn; fuxl@psych.ac.cn		;;;;				AB1SF		;;TEMPORAL VISUAL-CORTEX; FACE PERCEPTION; SELECTIVE ATTENTION; UNFAMILIAR;;FACES; STROOP DIMENSIONS; FAMILIAR; EMOTION; DEPENDENCIES; NEURONS;;;SPEECH		FRONT PSYCHOL	Front. Psychol.	English		28		PO BOX 110, LAUSANNE, 1015, SWITZERLAND	41992	11	LAUSANNE		J	FRONTIERS RESEARCH FOUNDATION	2013		Fu, XL (reprint author), Chinese Acad Sci, Inst Psychol, State Key Lab Brain & Cognit Sci, 10A Datun Rd, Beijing 100101, Peoples R China.	Psychology			1664-1078	FRONTIERS IN PSYCHOLOGY
A00030	;;Objective: The aim of the study was to assess the psychometric properties of the 36-Item Short Form Health Survey (SF-36) in the men who have sex with men (MSM) population in China.;;Methods: A cross-sectional survey was conducted among 373 MSM from September to December, 2012, in Zhengzhou and Huludao City, China. Internal reliability of the questionnaire was calculated by Cronbach's alpha coe…	;;Liu, Jie;;Qu, Bo;;Hu, Bingxue;;Jiang, Nan;;Wang, Dongbo		;;Liu, J;;Qu, B;;Hu, BX;;Jiang, N;;Wang, DB											10.1371/journal.pone.0083362	Article		qubo6666@163.com		;;;;		National Natural Science Foundation of China [81273186, 71103200]	;;This study was supported by the National Natural Science Foundation of;;China (Grant Number 81273186 and 71103200). The funders had no role in;;study design, data collection and analysis, decision to publish, or;;preparation of the manuscript.	276HY		;;WORLD-HEALTH-ORGANIZATION; MEDICAL OUTCOMES; HIV-INFECTION; SCALING;;ASSUMPTIONS; PREVALENCE; VALIDATION; SYPHILIS; DISEASE; VIRUS; AIDS	12	PLOS ONE	PLoS One	English		51		1160 BATTERY STREET, STE 100, SAN FRANCISCO, CA 94111 USA	41992	7	SAN FRANCISCO		J	PUBLIC LIBRARY SCIENCE	2013		Qu, B (reprint author), China Med Univ, Fac Hlth Stat, Sch Publ Hlth, Shenyang, Peoples R China.	Science & Technology - Other Topics			1932-6203	PLOS ONE
A00031	;;Background: Organized population-based HPV vaccination programs can be effective in reducing the burden of cervical cancer, especially in the absence of a comprehensive cervical screening program (e.g. Hong Kong). Assessment of vaccine acceptability is important when evaluating the feasibility and cost-effectiveness of such vaccination programs.;;Methods: To provide a more representative and up…	;;Choi, Horace C. W.;;Leung, Gabriel M.;;Woo, Pauline P. S.;;Jit, Mark;;Wu, Joseph T.		;;Choi, HCW;;Leung, GM;;Woo, PPS;;Jit, M;;Wu, JT			78							HPV vaccines; Cervical cancer; Attitudes; Health expenditures; Hong Kong	10.1016/j.vaccine.2013.10.068	Article		joewu@hku.hk	84	;;;;		;;Food and Health Bureau, Hong Kong Special Administrative Region;;Government [CHP-CE-05]; Hong Kong University Grants Committee;;[AoE/M-12106]; Graduate School of the University of Hong Kong	;;This work was supported by the Research Fund for the Control of;;Infectious Diseases from the Food and Health Bureau, Hong Kong Special;;Administrative Region Government (grant number CHP-CE-05) and the Area;;of Excellence Scheme of the Hong Kong University Grants Committee (grant;;number AoE/M-12106). HCC received financial support from the Graduate;;School of the University of Hong Kong.	289LT		HUMAN-PAPILLOMAVIRUS VACCINATION; CERVICAL-CANCER; CHINESE WOMEN; GIRLS	1	VACCINE	Vaccine	English		39		THE BOULEVARD, LANGFORD LANE, KIDLINGTON, OXFORD OX5 1GB, OXON, ENGLAND	41990	7	OXFORD		J	ELSEVIER SCI LTD	2013		Wu, JT (reprint author), Univ Hong Kong, Li Ka Shing Fac Med, Sch Publ Hlth, Div Epidemiol & Biostat, Hong Kong, Hong Kong, Peoples R China.	Immunology; Research & Experimental Medicine			0264-410X	VACCINE
A00032	Expert soccer players are able to utilize their opponents' early body kinematics to predict the direction in which the opponent will move. We have previously demonstrated enhanced fMRI activation in experts in the motor components of an action observation network (AON) during sports anticipation tasks. Soccer players often need to prevent opponents from successfully predicting their line of attac…	;;Wright, Michael J.;;Bishop, Daniel T.;;Jackson, Robin C.;;Abernethy, Bruce	851	;;Wright, MJ;;Bishop, DT;;Jackson, RC;;Abernethy, B										;;fMRI; action observation; deception; expertise; soccer; football; mirror;;neuron system; sport	10.3389/fnhum.2013.00851	Article		michael.wright@brunel.ac.uk		;;;;		;;Research Grants Council of the Hong Kong Special Administrative Region,;;China [HKU 7400/05H]	;;Supported by the Research Grants Council of the Hong Kong Special;;Administrative Region, China. Project No. HKU 7400/05H.	282TL		;;EXPERT-NOVICE DIFFERENCES; SPORT-RELATED ANTICIPATION; MOVEMENT;;FEATURES; DECISION-MAKING; PENALTY KICKS; FMRI DATA; INFORMATION;;;PERCEPTION; MECHANISMS; TENNIS		FRONT HUM NEUROSCI	Front. Hum. Neurosci.	English		47		PO BOX 110, LAUSANNE, 1015, SWITZERLAND	41990	15	LAUSANNE		J	FRONTIERS RESEARCH FOUNDATION	2013		Wright, MJ (reprint author), Brunel Univ, Dept Psychol, Ctr Cognit & Neuroimaging, Kingston Lane, Uxbridge UB8 3PH, Middx, England.	Neurosciences & Neurology; Psychology			1662-5161	FRONTIERS IN HUMAN NEUROSCIENCE
A00033	Burn wounds are severely stressful events that can have a significant impact on the mental health of patients. However, the impact of burns on individuals with different personality traits can be different. The present study aimed to investigate the impact of dispositional optimism on the subjective well-being of burn patients, and mainly focused on the confirmation of the mediator role of psycho…	;;Hei, Fei;;Cao, Rong;;Feng, Ziqi;;Guan, Hao;;Peng, Jiaxi	e82939	;;Hei, F;;Cao, R;;Feng, ZQ;;Guan, H;;Peng, JX											10.1371/journal.pone.0082939	Article		guanhao@fmmu.edu.cn; pengjx880124@sina.com		;;;;		;;Social Science foundation of the People's Republic of China [13XRK004];;;Natural Science Grant of Shann'xi Province [2012K18-03-06]; Social;;Science fund of China [13BGL074]	;;This study was supported by Social Science foundation of the People's;;Republic of China (13XRK004), Natural Science Grant of Shann'xi Province;;(2012K18-03-06), and Social Science fund of China (13BGL074). The;;funders had no role in study design, data collection and analysis,;;decision to publish, or preparation of the manuscript.	276GT		;;LIFE ORIENTATION TEST; SELF-ESTEEM; EGO-RESILIENCY; ADOLESCENTS;;;PERSONALITY; PERSPECTIVE; ADJUSTMENT; MEDIATION; ANXIETY; HEALTH	12	PLOS ONE	PLoS One	English		50		1160 BATTERY STREET, STE 100, SAN FRANCISCO, CA 94111 USA	41990	5	SAN FRANCISCO		J	PUBLIC LIBRARY SCIENCE	2013			Science & Technology - Other Topics			1932-6203	PLOS ONE
A00034	Although a greater degree of personal obesity is associated with weaker negativity toward overweight people on both explicit (i.e., self-report) and implicit (i.e., indirect behavioral) measures, overweight people still prefer thin people on average. We investigated whether the national and cultural context - particularly the national prevalence of obesity predicts attitudes toward overweight peo…	;;Marini, Maddalena;;Sriram, Natarajan;;Schnabel, Konrad;;Maliszewski, Norbert;;Devos, Thierry;;Ekehammar, Bo;;Wiers, Reinout;;Cai HuaJian;;Somogyi, Monika;;Shiomura, Kimihiro;;Schnall, Simone;;Neto, Felix;;Bar-Anan, Yoav;;Vianello, Michelangelo;;Ayala, Alfonso;;Dorantes, Gabriel;;Park, Jaihyun;;Kesebir, Selin;;Pereira, Antonio;;Tulbure, Bogdan;;Ortner, Tuulia;;Stepanikova, Irena;;Greenwald, Anth…		;;Marini, M;;Sriram, N;;Schnabel, K;;Maliszewski, N;;Devos, T;;Ekehammar, B;;Wiers, R;;Cai, HJ;;Somogyi, M;;Shiomura, K;;Schnall, S;;Neto, F;;Bar-Anan, Y;;Vianello, M;;Ayala, A;;Dorantes, G;;Park, J;;Kesebir, S;;Pereira, A;;Tulbure, B;;Ortner, T;;Stepanikova, I;;Greenwald, AG;;Nosekl, BA											10.1371/journal.pone.0083543	Article		maddalena.marini@unimore.it		;;;;		Project Implicit, Inc; University of Warsaw, Poland [BST164635]	;;This project was supported by Project Implicit, Inc;;(http://projectimplicit.net/), a non-profit organization that includes;;in its mission "To develop and deliver methods for investigating and;;applying phenomena of implicit social cognition, including especially;;phenomena of implicit bias based on age, race, gender or other factors.";;The Polish sample was financed from a grant from the Univ…	276GT		;;ANTI-FAT BIAS; ASSOCIATION TEST; HEALTH-PROFESSIONALS; BODY-WEIGHT;;;OBESITY; STIGMA; ATTITUDES; VALIDITY; DISCRIMINATION; STEREOTYPES	12	PLOS ONE	PLoS One	English		55		1160 BATTERY STREET, STE 100, SAN FRANCISCO, CA 94111 USA	41990	9	SAN FRANCISCO		J	PUBLIC LIBRARY SCIENCE	2013	Kesebir, Selin /C-9905-2014	Marini, M (reprint author), Univ Virginia, Dept Psychol, Gilmer Hall, Charlottesville, VA 22903 USA.	Science & Technology - Other Topics			1932-6203	PLOS ONE
A00035	;;The study of Pion Kangsoe-ka (hereafter PKSK) reached its peak in the 1980s and 1990s. However, several important topics in PKSK still remain provocative and unexplored. This study attempts to bring new approaches to the debates regarding how to interpret the identity of the main character Kangsoe and what the actual theme (as opposed to the surface theme, namely, lewdness) of the work is in or…	Hyuk-Chan, Kwon		Hyuk-Chan, K			589							;;identity of Pyon Kangsoe; surface theme and actual theme; alter ego;;;nonexistence of a one-voiced novel; manipulation of the emphasis on;;lewdness		Article		hckwon@cityu.edu.hk	609	;;;;				299ST			2	ACTA KOREANA	Acta Koreana	English		30		1095 DALGUBEOLDAERO, DALSEO-GU, DAEGU, 704-701, SOUTH KOREA	41988	21	DAEGU		J	ACADEMIA KOREANA KEIMYUNG UNIV	2013		Hyuk-Chan, K (reprint author), City Univ Hong Kong, Dept Chinese Translat & Linguist, Hong Kong, Hong Kong, Peoples R China.				1520-7412	ACTA KOREANA
A00036	;;Background: The identification of aneurysmal subarachnoid hemorrhage (aSAH) patients with a decrease in health-related quality of life (HRQOL) is challenging. Stroke-Specific Quality of Life (SS-QOL) Scale is one of the commonest disease-specific quality of life measures initially developed and validated for ischemic stroke patients. A disadvantage is subject burden and a short form is more pra…	;;Wong, George Kwok Chu;;Lam, Sandy Wai;;Ngai, Karine;;Wong, Adrian;;Poon, Wai Sang;;Mok, Vincent		;;Wong, GKC;;Lam, SW;;Ngai, K;;Wong, A;;Poon, WS;;Mok, V			204							;;Cognition; Depression; Quality of life; Stroke; Subarachnoid hemorrhage;;;Validation study	10.1016/j.jns.2013.09.033	Article		georgewong@surgery.cuhk.edu.hk	209	;;;;		Neurosurgery Research and Training Fund; Chinese University of Hong Kong	;;This study was supported by the Neurosurgery Research and Training Fund,;;the Chinese University of Hong Kong.	274HH		;;MONTREAL COGNITIVE ASSESSMENT; HEALTH SURVEY; VALIDATION; VALIDITY;;;VERSION; METAANALYSIS; RELIABILITY; POPULATION; IMPAIRMENT; AGREEMENT	41641	J NEUROL SCI	J. Neurol. Sci.	English		36		PO BOX 211, 1000 AE AMSTERDAM, NETHERLANDS	41988	6	AMSTERDAM		J	ELSEVIER SCIENCE BV	2013	Wong, Adrian/K-4859-2014	Wong, GKC (reprint author), Prince Wales Hosp, Dept Surg, 4-F Clin Sci Bldg,30-32 Ngan Shing St, Shatin, Hong Kong, Peoples R China.	Neurosciences & Neurology			0022-510X	JOURNAL OF THE NEUROLOGICAL SCIENCES
A00037	With respect to group decision-making problems with multi-granularity linguistic assessment information, a new approach is proposed. Firstly, the computational formulae are given in order to transform and unify the multi-granularity linguistic comparison matrices. Secondly, the method of standard and mean deviation is applied to determine the unknown attribute weights, and the weights of the deci…	;;Liu, Sen;;Chan, Felix T. S.;;Ran, Wenxue		;;Liu, S;;Chan, FTS;;Ran, WX			10129							;;Multi-attribute group decision-making; Multi-granularity; Standard and;;mean deviation; TOPSIS	10.1016/j.apm.2013.05.051	Article		liusencool@gmail.com; f.chan@polyu.edu.hk; ranwxa@vip.sina.com	10140	;;;;				277GC		;;INCOMPLETE WEIGHT INFORMATION; PREFERENCE RELATIONS; AGGREGATION;;OPERATORS; OWA OPERATORS; SELECTION; MODEL; ENVIRONMENT	24	APPL MATH MODEL	Appl. Math. Model.	English		41		360 PARK AVE SOUTH, NEW YORK, NY 10010-1710 USA	41988	12	NEW YORK		J	ELSEVIER SCIENCE INC	2013		Chan, FTS (reprint author), Hong Kong Polytech Univ, Dept Ind & Syst Engn, Hong Kong, Hong Kong, Peoples R China.	Engineering; Mathematics; Mechanics			0307-904X	APPLIED MATHEMATICAL MODELLING
A00038	This study examined the frequency of violence on nurses in Chinese psychiatric hospitals and explored its risk factors and impact on nurses' quality of life (QOL). A survey was conducted with 387 frontline psychiatric nurses in China. Information about experience of workplace violence in the past 6 months, type of workplace violence, and demographic characteristics was collected by a questionnair…	;;Zeng, Jiao-Ying;;An, Feng-Rong;;Xiang, Yu-Tao;;Qi, Yun-Ke;;Ungvari, Gabor S.;;Newhouse, Robin;;Yu, Doris S. F.;;Lai, Kelly Y. C.;;Yu, Liu-Yang;;Ding, Yan-Ming;;Tang, Wai-Kwong;;Wu, Ping-Ping;;Hou, Zhi-Jiaolong;;Chiu, Helen F. K.		;;Zeng, JY;;An, FR;;Xiang, YT;;Qi, YK;;Ungvari, GS;;Newhouse, R;;Yu, DSF;;Lai, KYC;;Yu, LY;;Ding, YM;;Tang, WK;;Wu, PP;;Hou, ZJ;;Chiu, HFK			510							;;Workplace violence; Psychiatric hospitals; Psychiatric nursing; Quality;;of life	10.1016/j.psychres.2013.06.013	Article		afrylm@sina.com; xyutly@gmail.com	514	;;;;		;;National Science Foundation of China [30800367, 30770776]; Beijing Nova;;Program of the Beijing Municipal Science and Technology Commission;;[2008B59]	;;The study was supported in part by grants from the National Science;;Foundation of China (Nos. 30800367 and 30770776) and the Beijing Nova;;Program of the Beijing Municipal Science and Technology Commission (No.;;2008B59).	273EU		MENTAL-HEALTH	2	PSYCHIAT RES	Psychiatry Res.	English		25		;;ELSEVIER HOUSE, BROOKVALE PLAZA, EAST PARK SHANNON, CO, CLARE, 00000,;;IRELAND	41988	5	CLARE		J	ELSEVIER IRELAND LTD	2013		An, FR (reprint author), Capital Med Univ, Beijing Anding Hosp, Beijing, Peoples R China.	Psychiatry			0165-1781	PSYCHIATRY RESEARCH
A00039	A retrospective nested case-control study was designed to explore whether freshman year mental health status and level of adaptation are predictors of Internet addiction. The study cohort was 977 college students at a university in northwest China. In the first college year, the students' mental health status and adaptation level were assessed using the Chinese College Student Mental Health Scale…	;;Yao, Bin;;Han, Wei;;Zeng, Lingxia;;Guo, Xiong		;;Yao, B;;Han, W;;Zeng, LX;;Guo, X			541							;;College freshmen; Internet addiction; Risk factors; Retrospective nested;;case-control design	10.1016/j.psychres.2013.07.023	Article		guox@mail.xjtu.edu.cn	547	;;;;				273EU		;;UNIVERSITY-STUDENTS; PSYCHIATRIC-SYMPTOMS; SELF-EFFICACY; ALCOHOL-USE;;;ADOLESCENTS; DISORDER; USAGE; ESTEEM; QUESTIONNAIRE; PREVALENCE	2	PSYCHIAT RES	Psychiatry Res.	English		64		;;ELSEVIER HOUSE, BROOKVALE PLAZA, EAST PARK SHANNON, CO, CLARE, 00000,;;IRELAND	41988	7	CLARE		J	ELSEVIER IRELAND LTD	2013		Guo, X (reprint author), Xi An Jiao Tong Univ, Sch Med, Fac Publ Hlth, 76 Yanta West Rd, Xian 710061, Shaanxi Provinc, Peoples R China.	Psychiatry			0165-1781	PSYCHIATRY RESEARCH
A00040	This study was designed to explore the relationship between pituitary microadenoma and psychosis and to evaluate the role that prolactin plays in pituitary microadenoma and comorbid psychosis. In this study, the prolactin serum levels were compared between 74 first-episode drug-naive patients with a pituitary microadenoma with psychosis (PMP), and 58 patients with a pituitary microadenoma with no…	;;Cheng, Minfeng;;Wen, Shenglin;;Tang, Xiumei;;Zhong, Zhiyong;;Gan, Zhaoyu		;;Cheng, MF;;Wen, SL;;Tang, XM;;Zhong, ZY;;Gan, ZY			590							Prolactin; Psychosis; Hyperprolactinemia; Microadenoma; Dopamine	10.1016/j.psychres.2013.06.027	Article		wenshl@mail.sysu.edu.cn	593	;;;;		;;Technology Project of Guangdong Province, china [2010B031600311,;;2012B031800283]	;;The study was supported by grants from the Technology Project of;;Guangdong Province, china (No. 2010B031600311 and No. 2012B031800283).	273EU		ATYPICAL ANTIPSYCHOTICS; VOLUME; SCHIZOPHRENIA; ARIPIPRAZOLE; DISORDER	2	PSYCHIAT RES	Psychiatry Res.	English		19		;;ELSEVIER HOUSE, BROOKVALE PLAZA, EAST PARK SHANNON, CO, CLARE, 00000,;;IRELAND	41988	4	CLARE		J	ELSEVIER IRELAND LTD	2013		Wen, SL (reprint author), Sun Yat Sen Univ, Dept Psychiat, Affiliated Hosp 3, 600 Tianhe Rd, Guangzhou 510630, Guangdong, Peoples R China.	Psychiatry			0165-1781	PSYCHIATRY RESEARCH
A00041	This study examined the prevalence rates of problem gambling among older adults in Singapore. A stratified sampling method was used to select the nationally representative sample of 3010 older adults aged 55 years and above. The survey participants were of varying ethnicities living in the community, including Chinese, Malay, and Indian (and others). A structured questionnaire, including the Cana…	;;Tse, Samson;;Hong, Song-Iee;;Ng, King-Lam		;;Tse, S;;Hong, SI;;Ng, KL			607							Gambling disorder; Asian countries; Pathological gambling; Culture	10.1016/j.psychres.2013.06.017	Article		samsont@hku.hk; swkhs@nus.edu.sg; ngkljen@hku.hk	611	;;;;				273EU			2	PSYCHIAT RES	Psychiatry Res.	English		22		;;ELSEVIER HOUSE, BROOKVALE PLAZA, EAST PARK SHANNON, CO, CLARE, 00000,;;IRELAND	41988	5	CLARE		J	ELSEVIER IRELAND LTD	2013		Tse, S (reprint author), Univ Hong Kong, Dept Social Work & Social Adm, Fac Social Sci, Fac Social Sci Bldg, Room 520,5-F,Pokfulam Rd, Hong Kong, Hong Kong, Peoples R China.	Psychiatry			0165-1781	PSYCHIATRY RESEARCH
A00042	In this study, we analyzed four single nucleotide polymorphisms (SNPs) (rs10491734, rs2228622, rs301430 and rs301443) of the solute carrier family 1 gene (SLC1A1) in a set of 616 schizophrenia patients and 638 matched healthy controls of Han Chinese descent. No significant differences of genotype or allele distribution were identified between the patients and controls. Our data suggest that SLC1A…	;;Lu, Weihong;;Wu, Haisu;;Cai, Jun;;Wang, Zuowei;;Yi, Zhenghui;;Yu, Shunying;;Fang, Yiru;;Zhang, Chen		;;Lu, WH;;Wu, HS;;Cai, J;;Wang, ZW;;Yi, ZH;;Yu, SY;;Fang, YR;;Zhang, C			669							SLC1A1; Genetic association; Schizophrenia	10.1016/j.psychres.2013.07.009	Article		yirufang@aliyun.com; zhangchen645@gmail.com	671	;;;;		;;National Natural Science Foundation of China [81000581]; Shanghai;;Science & Technology Development Foundation [12140904200]; China;;Postdoctoral Science Foundation [2013M530410]; National Key Clinical;;Disciplines at Shanghai Mental Health Center (OMA-MH) [2011-873]	;;We are grateful to all the participants for their invaluable;;contribution to our research. We thank the two reviewers for their;;insightful comments. This work was supported by National Natural Science;;Foundation of China (81000581), the Shanghai Science & Technology;;Development Foundation (12140904200), the China Postdoctoral Science;;Foundation (2013M530410) and the National Key Clinical D…	273EU		DISORDER; EXPRESSION; GENES	2	PSYCHIAT RES	Psychiatry Res.	English		18		;;ELSEVIER HOUSE, BROOKVALE PLAZA, EAST PARK SHANNON, CO, CLARE, 00000,;;IRELAND	41988	3	CLARE		J	ELSEVIER IRELAND LTD	2013		Fang, YR (reprint author), Shanghai Jiao Tong Univ, Sch Med, Shanghai Mental Hlth Ctr, Div Mood Disorders, Shanghai 200030, Peoples R China.	Psychiatry			0165-1781	PSYCHIATRY RESEARCH
A00043	There has been an increasing level of attention to sustainability issues in higher education by academic leaders, students and by policy makers and the public, at large due to significant impacts of university activities have upon society environmentally and socially in the short and long-term. The last decade has witnessed the promotion of "Green University" in China with an aim of fostering sus…	;;Yuan, Xueliang;;Zuo, Jian;;Huisingh, Donald		;;Yuan, XL;;Zuo, J;;Huisingh, D			36							;;The Green University; Sustainability performance; China; Stakeholder;;involvement; University transformation	10.1016/j.jclepro.2012.12.030	Article		;;xueliang_yuan@yahoo.com.cn; jian.zuo@unisa.edu.au;;;donaldhuisingh@comcast.net	45	;;;;		;;Award Fund for Young Scientists of Shandong Province [BS2012SF015];;;Humanities & Social Sciences Project, Ministry of Education [10YJCZH209]	;;This research was supported by Award Fund for Young Scientists of;;Shandong Province (no. BS2012SF015) and Humanities & Social Sciences;;Project, Ministry of Education (no. 10YJCZH209).	261PH		;;ACHIEVING CAMPUS SUSTAINABILITY; HIGHER-EDUCATION INSTITUTIONS;;;ENVIRONMENTAL-MANAGEMENT; TOP-DOWN; IMPLEMENTATION; AUDIT; STATE; TOOL		J CLEAN PROD	J. Clean Prod.	English		58		THE BOULEVARD, LANGFORD LANE, KIDLINGTON, OXFORD OX5 1GB, OXON, ENGLAND	41988	10	OXFORD		J	ELSEVIER SCI LTD	2013		Yuan, XL (reprint author), Shandong Univ, Sch Energy & Power Engn, 17923 Jingshi Rd, Jinan 250061, Shandong, Peoples R China.	Engineering; Environmental Sciences & Ecology			0959-6526	JOURNAL OF CLEANER PRODUCTION
A00044	Before launching a real viral marketing campaign, it is needed to design a spreading scheme by simulations. Based on a categorization of spreading patterns in real world and models, we point out that the existing research (especially Yang et al. (2010) Ref. [16]) implicitly assume that if a user decides to post a received message (is activated), he/she will take the reposting action promptly (Pro…	;;Yang, Jianmei;;Zhuang, Dong;;Xie, Weicong;;Chen, Guangrong		;;Yang, JM;;Zhuang, D;;Xie, WC;;Chen, GR			6494							;;Spreading scheme; Viral marketing; Design approach; QQgroup; Human;;dynamics; Complex network	10.1016/j.physa.2013.07.059	Article		;;fbajyang@scut.edu.cn; dzhuang@scut.edu.cn; wooder58@163.com;;;gchen@ee.cityu.edu.hk	6505	;;;;		National Science Foundation of China [71273093, 71090403, 71090400]	;;This research is supported by the National Science Foundation of China;;(Project No. 71273093/71090403/71090400).	249GT		SMALL-WORLD NETWORKS; PERCOLATION; MODEL; EPIDEMICS	24	PHYSICA A	Physica A	English		20		PO BOX 211, 1000 AE AMSTERDAM, NETHERLANDS	41988	12	AMSTERDAM		J	ELSEVIER SCIENCE BV	2013		Yang, JM (reprint author), S China Univ Technol, Sch Business Adm, Guangzhou 510640, Guangdong, Peoples R China.	Physics			0378-4371	PHYSICA A-STATISTICAL MECHANICS AND ITS APPLICATIONS
A00045	In real-word cargo transportation practice, such as the deliveries of perishable food and hazardous materials, neglecting the cargo weight in a typical vehicle routing problem (VRP) may prevent the routes from being the most cost effective. Thus, this paper proposes the split-delivery weighted vehicle routing problem (SDWVRP), which consists of constructing the optimal routes, with respect to the…	;;Tang, Jiafu;;Ma, Yuyan;;Guan, Jing;;Yan, Chongjun		;;Tang, JF;;Ma, YY;;Guan, J;;Yan, CJ			7468							SDVRP; WVRP; Max-Min Ant system; Benchmarking test; Meta-heuristics	10.1016/j.eswa.2013.06.068	Article		jftang@mail.neu.edu.cn	7477	;;;;		;;National Natural Science Foundation of China [71021061, 61273204];;;Fundamental Research Funds for the Central Universities [N090204001,;;N110404021]; MOE of China [20120042110023]	;;This research is supported by the National Natural Science Foundation of;;China (71021061, 61273204), the Fundamental Research Funds for the;;Central Universities (N090204001, N110404021), and the Funding for the;;PhD program from MOE of China (20120042110023).	221MM		;;GRID NETWORK DISTANCES; NEIGHBORHOOD SEARCH; SCATTER SEARCH; TIME;;WINDOWS; LOADING COST; OPTIMIZATION; ALGORITHM; COLONY; COMPLEXITY	18	EXPERT SYST APPL	Expert Syst. Appl.	English		34		THE BOULEVARD, LANGFORD LANE, KIDLINGTON, OXFORD OX5 1GB, ENGLAND	41988	10	OXFORD		J	PERGAMON-ELSEVIER SCIENCE LTD	2013		Tang, JF (reprint author), Northeastern Univ, Dept Syst Engn, State Key Lab Synthet Automat Proc Ind, Shenyang 110004, Peoples R China.	Computer Science; Engineering; Operations Research & Management Science			0957-4174	EXPERT SYSTEMS WITH APPLICATIONS
A00046	Irritable bowel syndrome (IBS) is a common disorder, reported to be found in 5%-20% of the general population. Its management accounts for up to 25% of a gastroenterologist's workload in the outpatient department, and the main symptoms are abdominal pain, bloating, and altered bowel habits. Despite a great amount of available pharmacological treatments aimed at a wide variety of gastrointestinal …	;;Tang, Qing-Lin;;Lin, Guo-Yao;;Zhang, Ming-Qing		;;Tang, QL;;Lin, GY;;Zhang, MQ			8605							;;Cognitive-behavioral therapy; Irritable bowel syndrome; Psychological;;treatment	10.3748/wjg.v19.i46.8605	Review		zhangmingqing20@163.com	8610	;;;;				281VN		;;RANDOMIZED CONTROLLED-TRIAL; FUNCTIONAL GASTROINTESTINAL DISORDERS;;;QUALITY-OF-LIFE; PRIMARY-CARE; SELF-MANAGEMENT; ANTISPASMODIC TREATMENT;;;CLINICAL-TRIAL; DIAGNOSIS; DEPRESSION; EXPOSURE	46	WORLD J GASTROENTERO	World J. Gastroenterol.	English		68		;;ROOM 1701, 17-F, HENAN BUILDING, NO. 90, JAFFE RD, WANCHAI, HONG KONG;;100025, PEOPLES R CHINA	41987	6	WANCHAI		J	BAISHIDENG PUBL GRP CO LTD	2013		Zhang, MQ (reprint author), Xiamen Univ, Affiliated Southeast Hosp, Dept Gastroenterol, Hosp PLA 175, 269 Middle Zhanghua Rd, Zhangzhou 363000, Fujian Province, Peoples R China.	Gastroenterology & Hepatology			1007-9327	WORLD JOURNAL OF GASTROENTEROLOGY
A00047		;;Chen, Zhu;;Wang, Jin-Nan;;Ma, Guo-Xia;;Zhang, Yan-Shen		;;Chen, Z;;Wang, JN;;Ma, GX;;Zhang, YS			1959									Editorial Material		wangjn@caep.org.cn	1960	;;;;				269EI			9909	LANCET	Lancet	English		8		360 PARK AVE SOUTH, NEW YORK, NY 10010-1710 USA	41987	2	NEW YORK		J	ELSEVIER SCIENCE INC	2013		Wang, JN (reprint author), Chinese Acad Environm Planning, Beijing 100012, Peoples R China.	General & Internal Medicine			0140-6736	LANCET
A00048		;;Xiao, Dan;;Chen, Zhengming;;Wang, Chen		;;Xiao, D;;Chen, ZM;;Wang, C			1964								10.1016/S0140-6736(13)61839-5	Editorial Material		danxiao@263.net	1966	;;;;				269EI			9909	LANCET	Lancet	English		14		360 PARK AVE SOUTH, NEW YORK, NY 10010-1710 USA	41987	3	NEW YORK		J	ELSEVIER SCIENCE INC	2013		Xiao, D (reprint author), Capital Med Univ, Beijing Chao Yang Hosp, Beijing 100020, Peoples R China.	General & Internal Medicine			0140-6736	LANCET
A00049	;;Background: Poor self-rated health (SRH) is socially patterned with health communication inequalities, arguably, serving as one mechanisms. This study investigated the effects of health information seeking on SRH, and its mediation effects on disparities in SRH.;;Methods: We conducted probability-based telephone surveys administered over telephone in 2009, 2010/11 and 2012 to monitor health inf…	;;Wang, Man Ping;;Wang, Xin;;Lam, Tai Hing;;Viswanath, Kasisomayajula;;Chan, Sophia S.	e82720	;;Wang, MP;;Wang, X;;Lam, TH;;Viswanath, K;;Chan, SS											10.1371/journal.pone.0082720	Article		hrmrlth@hku.hk		;;;;		Hong Kong Jockey Club Charities Trust	;;This study was a part of the project "FAMILY: A Jockey Club Initiative;;for a Harmonious Society,'' which was funded by The Hong Kong Jockey;;Club Charities Trust. The funders had no role in study design, data;;collection and analysis, decision to publish, or preparation of the;;manuscript.	276FP		COMMUNICATION; INEQUALITIES; DISPARITIES; BEHAVIORS; MORTALITY; RISK	12	PLOS ONE	PLoS One	English		35		1160 BATTERY STREET, STE 100, SAN FRANCISCO, CA 94111 USA	41986	7	SAN FRANCISCO		J	PUBLIC LIBRARY SCIENCE	2013		Lam, TH (reprint author), Univ Hong Kong, Sch Publ Hlth, Hong Kong, Hong Kong, Peoples R China.	Science & Technology - Other Topics			1932-6203	PLOS ONE
A00050	;;Objective: To explore the neural mechanisms of negative emotion regulation in patients with post-traumatic stress disorder (PTSD).;;Methods: Twenty PTSD patients and 20 healthy subjects were recruited. Event-related functional magnetic resonance imaging (fMRI) was used to investigate the modification of emotional responses to negative stimuli. Participants were required to regulate their emotio…	;;Xiong, Kunlin;;Zhang, Ye;;Qiu, Mingguo;;Zhang, Jingna;;Sang, Linqiong;;Wang, Li;;Xie, Bing;;Wang, Jian;;Li, Min	e81957	;;Xiong, KL;;Zhang, Y;;Qiu, MG;;Zhang, JN;;Sang, LQ;;Wang, L;;Xie, B;;Wang, J;;Li, M											10.1371/journal.pone.0081957	Article		qiumingguo@yahoo.com		;;;;		;;National Natural Science Foundation of China [30870696]; Starting Funds;;of Third Military University [TMMU2009XHG01]; Natural Science Foundation;;of Chongqing [CSTC2009BB5019]	;;This study was sponsored by the National Natural Science Foundation of;;China (Grant number 30870696), the Starting Funds of Third Military;;University (TMMU2009XHG01), and the Natural Science Foundation of;;Chongqing (CSTC2009BB5019). The funders had no role in study design,;;data collection and analysis, decision to publish, or preparation of the;;manuscript.	276FP		;;PTSD; SUPPRESSION; CINGULATE; MEMORY; CONSEQUENCES; ALEXITHYMIA;;;RESILIENCE; FMRI	12	PLOS ONE	PLoS One	English		42		1160 BATTERY STREET, STE 100, SAN FRANCISCO, CA 94111 USA	41986	7	SAN FRANCISCO		J	PUBLIC LIBRARY SCIENCE	2013		Qiu, MG (reprint author), Third Mil Med Univ, Dept Med Image, Coll Biomed Engn, Chongqing, Peoples R China.	Science & Technology - Other Topics			1932-6203	PLOS ONE
A00051	;;Objective: To assess the overall mortality of methadone maintenance treatment (MMT) clients in China and its associated factors.;;Methods: A total of 1,511 MMT clients, all of whom enrolled in China's first eight MMT clinics between March and December 2004, were included in this cohort study and followed for approximately six years, until June 2010. Mortality and its predictors were examined us…	;;Cao, Xiaobin;;Wu, Zunyou;;Li, Li;;Pang, Lin;;Rou, Keming;;Wang, Changhe;;Luo, Wei;;Yin, Wenyuan;;Li, Jianhua;;McGoogan, Jennifer M.	e82476	;;Cao, XB;;Wu, ZY;;Li, L;;Pang, L;;Rou, KM;;Wang, CH;;Luo, W;;Yin, WY;;Li, JH;;McGoogan, JM					Natl Methadone Maintenance						10.1371/journal.pone.0082476	Article		wuzunyou@chinaaids.cn		;;;;		;;Chinese National Methadone Maintenance Treatment Program; Fogarty;;International Center, National Institute on Drug Abuse of the US;;National Institutes of Health [5U2RTW006918-08]	;;Support for this study was provided by the Chinese National Methadone;;Maintenance Treatment Program and the Fogarty International Center,;;National Institute on Drug Abuse of the US National Institutes of Health;;(Grant # 5U2RTW006918-08). The funders had no role in study design, data;;collection and analysis, decision to publish, or preparation of the;;manuscript.	276EU		;;ADMINISTERED ANTIRETROVIRAL THERAPY; INJECTION-DRUG USERS; HEROIN USERS;;;RECEIVING METHADONE; TREATMENT OUTCOMES; HIV PREVENTION; TREATMENT MMT;;;RETENTION; ADHERENCE; SURVIVAL	12	PLOS ONE	PLoS One	English		44		1160 BATTERY STREET, STE 100, SAN FRANCISCO, CA 94111 USA	41985	10	SAN FRANCISCO		J	PUBLIC LIBRARY SCIENCE	2013		Wu, ZY (reprint author), Chinese Ctr Dis Control & Prevent, Natl Ctr AIDS STD Control & Prevent, Beijing, Peoples R China.	Science & Technology - Other Topics			1932-6203	PLOS ONE
A00052	The meaning of person names is determined by their associated information. This study used event related potentials to investigate the time course of integrating the newly constructed meaning of person names into discourse context. The meaning of person names was built by two-sentence descriptions of the names. Then we manipulated the congruence of person names relative to discourse context in a …	;;Wang, Lin;;Yang, Yufang	e83206	;;Wang, L;;Yang, YF											10.1371/journal.pone.0083206	Article		wangl@psych.ac.cn		;;;;		;;Scientific Foundation of Institute of Psychology, Chinese Academy of;;Sciences [Y1CX312005]	;;This work was supported by the Scientific Foundation of Institute of;;Psychology, Chinese Academy of Sciences [grant number: Y1CX312005]. The;;funders had no role in study design, data collection and analysis,;;decision to publish, or preparation of the manuscript.	276EU		LANGUAGE COMPREHENSION; BRAIN POTENTIALS; ERP; N400; SENTENCES; PROPER	12	PLOS ONE	PLoS One	English		36		1160 BATTERY STREET, STE 100, SAN FRANCISCO, CA 94111 USA	41985	6	SAN FRANCISCO		J	PUBLIC LIBRARY SCIENCE	2013		Wang, L (reprint author), Chinese Acad Sci, Inst Psychol, Key Lab Behav Sci, Beijing 100101, Peoples R China.	Science & Technology - Other Topics			1932-6203	PLOS ONE
A00053	Sensory-specific cortices appear to be sensitive to information from another modality. Here we investigate whether the human brain automatically extracts the phonological information in visual words in early visual processing. We continuously presented native Chinese speakers peripherally with Chinese homophone characters in an oddball paradigm, while they performed a visual detection task presen…	;;Wang, Xiao-Dong;;Wu, Yin-Yuan;;Liu, A. -Ping;;Wang, Peng	3485	;;Wang, XD;;Wu, YY;;Liu, AP;;Wang, P											10.1038/srep03485	Article		xd-wang@ntu.edu.sg		;;;;		National 863 project of China [2009AA02Z305]	;;This work was supported by grant No. 2009AA02Z305 from National 863;;project of China.	273AB		;;MISMATCH-NEGATIVITY MMN; ELECTROPHYSIOLOGICAL EVIDENCE; BRAIN;;POTENTIALS; LEXICAL DECISION; MEMORY TRACES; RECOGNITION; ORTHOGRAPHY;;;CORTEX; LATERALIZATION; REGULARITIES		SCI REP-UK	Sci Rep	English		50		MACMILLAN BUILDING, 4 CRINAN ST, LONDON N1 9XW, ENGLAND	41985	7	LONDON		J	NATURE PUBLISHING GROUP	2013		Wang, XD (reprint author), Nanyang Technol Univ, Sch Humanities & Social Sci, Div Psychol, Singapore 639798, Singapore.	Science & Technology - Other Topics			2045-2322	SCIENTIFIC REPORTS
A00054	Impairments in flexible goal-directed decisions, often examined by reversal learning, are associated with behavioral abnormalities characterized by impulsiveness and disinhibition. Although the lateral orbital frontal cortex (OFC) has been consistently implicated in reversal learning, it is still unclear whether this region is involved in negative feedback processing, behavioral control, or both,…	;;Xue, Gui;;Xue, Feng;;Droutman, Vita;;Lu, Zhong-Lin;;Bechara, Antoine;;Read, Stephen	e82169	;;Xue, G;;Xue, F;;Droutman, V;;Lu, ZL;;Bechara, A;;Read, S											10.1371/journal.pone.0082169	Article		read@usc.edu		;;;;		;;National Institute on Drug Abuse of the National Institutes of Health;;[R01DA031626]; National Science Foundation of China [31130025]	;;Research reported in this publication was supported by the National;;Institute on Drug Abuse of the National Institutes of Health;;(R01DA031626), and the National Science Foundation of China (31130025).;;The content is solely the responsibility of the authors and does not;;necessarily represent the official views of the funding agency. The;;funders had no role in study design, data collection a…	276EG		;;VENTROMEDIAL PREFRONTAL CORTEX; HUMAN ORBITOFRONTAL CORTEX;;;EVENT-RELATED FMRI; OBSESSIVE-COMPULSIVE DISORDER; FRONTAL-LOBE DAMAGE;;;DECISION-MAKING; RESPONSE REVERSAL; DORSAL STRIATUM; SEX-DIFFERENCES;;;ATTENTIONAL CONTROL	12	PLOS ONE	PLoS One	English		87		1160 BATTERY STREET, STE 100, SAN FRANCISCO, CA 94111 USA	41984	11	SAN FRANCISCO		J	PUBLIC LIBRARY SCIENCE	2013		Read, S (reprint author), Univ So Calif, Dept Psychol, Los Angeles, CA 90089 USA.	Science & Technology - Other Topics			1932-6203	PLOS ONE
A00055	;;Background: Addiction treatment faces high pretreatment and treatment dropout rates, especially among Aboriginals. In this study we examined characteristic differences between Aboriginal and non-Aboriginal clients accessing an inpatient medical withdrawal management program, and identified risk factors associated with the probabilities of pretreatment and treatment dropouts, respectively.;;Meth…	;;Li, Xin;;Sun, Huiying;;Marsh, David C.;;Anis, Aslam H.	38	;;Li, X;;Sun, HY;;Marsh, DC;;Anis, AH										;;Aboriginal; Housing; Pretreatment dropout rate; Treatment dropout rate;;;Withdrawal management; Substance use disorders; Detoxification	10.1186/1477-7517-10-38	Article		aslam.anis@ubc.ca		;;;;				295JS		;;DRUG DETOXIFICATION PROGRAM; SUBSTANCE-ABUSE; INPATIENT DETOXIFICATION;;;ATTRITION PREVENTION; RISK-FACTORS; SELF-REPORTS; FOLLOW-UP;;;INDIVIDUALS; PREDICTORS; OUTCOMES		HARM REDUCT J	Harm Reduct. J.	English		39		236 GRAYS INN RD, FLOOR 6, LONDON WC1X 8HL, ENGLAND	41983	7	LONDON		J	BIOMED CENTRAL LTD	2013		Anis, AH (reprint author), Ctr Hlth Evaluat & Outcome Sci, 588-1081 Burrard St, Vancouver, BC V6Z 1Y6, Canada.	Substance Abuse			1477-7517	HARM REDUCTION JOURNAL
A00056	Impact factor, as an important indicator for the evaluation of research performance, has always been the concern of scientists and scientometricians. For a long time, many Chinese researchers have believed that impact factor is used as an indicator to evaluate research performance only in South Asian countries and regions, especially in China. In this article, we study how impact factor is presen…	;;Liu Xue-li;;Wang Mei-ying;;Zhang Lin;;Wang Pu;;Zhou Zhi-xin		;;Liu, XL;;Wang, MY;;Zhang, L;;Wang, P;;Zhou, ZX			1480							;;China; global infatuation; impact factor; medical journals; research;;performance evaluation; South Asia		Article		liueditor@163.com	1484	;;;;				287JH		FACTOR MANIPULATION; H-INDEX; CITATIONS; POWER	11	CURR SCI INDIA	Curr. Sci.	English		51		C V RAMAN AVENUE, SADASHIVANAGAR, P B #8005, BANGALORE 560 080, INDIA	41983	5	BANGALORE		J	INDIAN ACAD SCIENCES	2013		Liu, XL (reprint author), Xinxiang Med Univ, Henan Res Ctr Sci Journals, Xinxiang 453003, Henan Province, Peoples R China.	Science & Technology - Other Topics			0011-3891	CURRENT SCIENCE
A00057	;;Objectives: Prior evidence suggests geographic disparities in the effect of maternal education on child nutritional status between countries, between regions and between urban and rural areas. We postulated its effect would also vary by micro-geographic locations (indicated by mountain areas, plain areas and the edge areas) in a Chinese minority area.;;Methods: A cross-sectional study was condu…	;;Wang, Cuili;;Kane, Robert L.;;Xu, Dongjuan;;Li, Lingui;;Guan, Weihua;;Li, Hui;;Meng, Qingyue	e82500	;;Wang, CL;;Kane, RL;;Xu, DJ;;Li, LG;;Guan, WH;;Li, H;;Meng, QY											10.1371/journal.pone.0082500	Article		qmeng@bjmu.edu.cn		;;;;		CMB (China Medical Board) [09-947]	;;The research team is grateful to the CMB (China Medical Board, 09-947);;for their financial support. URL:http://www.chinamedicalboard.org/). The;;funders had no role in study design, data collection and analysis,;;decision to publish, or preparation of the manuscript.	275VW		;;RISK-FACTORS; HEALTH; UNDERNUTRITION; MALNUTRITION; BANGLADESH;;;HOUSEHOLD; MORTALITY; CONSEQUENCES; DETERMINANTS; PREVALENCE	12	PLOS ONE	PLoS One	English		43		1160 BATTERY STREET, STE 100, SAN FRANCISCO, CA 94111 USA	41983	8	SAN FRANCISCO		J	PUBLIC LIBRARY SCIENCE	2013		Meng, QY (reprint author), Peking Univ, China Ctr Hlth Dev Studies, Beijing 100871, Peoples R China.	Science & Technology - Other Topics			1932-6203	PLOS ONE
A00058	The measurement of illicit drug metabolites in raw wastewater is increasingly being adopted as an approach to objectively monitor population-level drug use, and is an effective complement to traditional epidemiological methods. As such, it has been widely applied in western countries. In this study, we utilised this approach to assess drug use patterns over nine days during April 2011 in Hong Kon…	;;Lai, Foon Yin;;Bruno, Raimondo;;Leung, Ho Wing;;Thai, Phong K.;;Ort, Christoph;;Carter, Steve;;Thompson, Kristie;;Lam, Paul K. S.;;Mueller, Jochen F.		;;Lai, FY;;Bruno, R;;Leung, HW;;Thai, PK;;Ort, C;;Carter, S;;Thompson, K;;Lam, PKS;;Mueller, JF			126							Cocaine; China; Ketamine; MDMA; Methamphetamine; Substance consumption	10.1016/j.forsciint.2013.09.003	Article		foon.lai@uqconnect.edu.au	132	;;;;		;;Australian Future Forensics Innovation Network; QHFSS/Entox;;Collaborative Research Funds; Australia Crime Commission; Crime and;;Misconduct Commission of Queensland; National Natural Science Foundation;;of China (NFSC) [N_CityU127/12]; UQ Postdoctoral Research Fellowship;;;Australian Research Council [FF 120100546]; [LE 110100032]	;;The National Research Centre for Environmental Toxicology (Entox) is a;;joint venture of The University of Queensland (UQ) and Queensland Health;;Forensic Scientific Services (QHFSS). The authors sincerely thank Pak;;Chuen Cheung (The Hong Kong Drainage Service Department) and Mei Po Tsui;;(City University of Hong Kong) for assisting with sampling. The;;financial support of this research at Ent…	264PT		;;SOLID-PHASE EXTRACTION; ECGONINE METHYL-ESTER; URINARY-EXCRETION;;;KETAMINE USE; COCAINE; EPIDEMIOLOGY; POPULATION; METABOLITES; SEWAGE;;;TRENDS	41642	FORENSIC SCI INT	Forensic Sci.Int.	English		49	Thai, Phong/0000-0003-0042-3057; Ort, Christoph/0000-0001-9950-2286	;;ELSEVIER HOUSE, BROOKVALE PLAZA, EAST PARK SHANNON, CO, CLARE, 00000,;;IRELAND	41983	7	CLARE		J	ELSEVIER IRELAND LTD	2013	;;Thai, Phong/A-3998-2011; Mueller, Jochen/C-6241-2008; LAM,;;Paul/B-9121-2008; Ort, Christoph/F-5066-2012	Lai, FY (reprint author), Univ Queensland, Natl Res Ctr Environm Toxicol Entox, 39 Kessels Rd, Coopers Plains, Qld 4108, Australia.	Legal Medicine			0379-0738	FORENSIC SCIENCE INTERNATIONAL
A00059	Despite the recent effort by Chan and Frei [1] in studying female sexual homicide offenders (SHOs), much is still unknown about this underresearched offender population. One largely unexplored area is how female SHOs of different races commit their killings. Using FBI Supplemental Homicide Reports (SHR) data (1976-2007), 105 White and 94 Black female SHOs (N = 204) were examined for their differe…	;;Chan, Heng Choon (Oliver);;Frei, Autumn M.;;Myers, Wade C.		;;Chan, HC;;Frei, AM;;Myers, WC			265							;;Sexual homicide; Sexual murderer; Sexual homicide offender; Female;;offender; Race; Offending pattern	10.1016/j.forsciint.2013.09.011	Article		oliverchan.ss@cityu.edu.hk; afrei@fmhi.usf.edu; wmyers@lifespan.org	272	;;;;				264PT		;;RISK-ASSESSMENT; SERIAL KILLER; UNITED-STATES; VICTIM; CRIME; RACE;;;PERPETRATORS; MURDERERS; JUVENILE; GENDER	41642	FORENSIC SCI INT	Forensic Sci.Int.	English		91		;;ELSEVIER HOUSE, BROOKVALE PLAZA, EAST PARK SHANNON, CO, CLARE, 00000,;;IRELAND	41983	8	CLARE		J	ELSEVIER IRELAND LTD	2013		Chan, HC (reprint author), City Univ Hong Kong, Dept Appl Social Studies, 83 Tat Chee Ave, Kowloon, Hong Kong, Peoples R China.	Legal Medicine			0379-0738	FORENSIC SCIENCE INTERNATIONAL
A00060	Analysis of health care cost data is often complicated by a high level of skewness, heteroscedastic variances and the presence of missing data. Most of the existing literature on cost data analysis have been focused on modeling the conditional mean. In this paper, we study a weighted quantile regression approach for estimating the conditional quantiles health care cost data with missing covariate…	;;Sherwood, Ben;;Wang, Lan;;Zhou, Xiao-Hua		;;Sherwood, B;;Wang, L;;Zhou, XH			4967							;;health care cost data; missing data; inverse probability weighting;;;quantile regression	10.1002/sim.5883	Article		azhou@u.washington.edu	4979	;;;;		;;National Science Foundation [DMS-1007603]; US Department of Veterans;;Affairs, Veterans Affairs Health Administration, HSRD grants [RCS;;05-196]	;;The authors are grateful for the comments from the Associate Editor and;;the two referees, which help us significantly improve the paper. Wang;;and Zhou are joint correspondence authors for this paper. National;;Science Foundation grant DMS-1007603 supported the work of Sherwood and;;Wang. Xiao-Hua Zhou, PhD, is presently a Core Investigator and;;Biostatistics Unit Director at the Northwest HSR…	248UH		LONGITUDINAL DATA; MODELS; FIT	28	STAT MED	Stat. Med.	English		15		111 RIVER ST, HOBOKEN 07030-5774, NJ USA	41983	13	HOBOKEN		J	WILEY-BLACKWELL	2013		Zhou, XH (reprint author), Univ Washington, Dept Biostat, HSB, F600,Box 357232, Seattle, WA 98198 USA.	;;Mathematical & Computational Biology; Public, Environmental &;;Occupational Health; Medical Informatics; Research & Experimental;;Medicine; Mathematics			0277-6715	STATISTICS IN MEDICINE
A00061	;;Background: In China, there is increasing concern because of the rapid increase in HIV infection recorded over recent years. Migrant workers are recognized as one of the groups most affected. In this study, HIV/AIDS-related knowledge, attitudes, and behavior among unmarried migrant workers in Shanghai are investigated, with the aim of providing critical information for policy makers and sex edu…	;;Wang, Ke-Wei;;Wu, Jun-Qing;;Zhao, Hong-Xin;;Li, Yu-Yan;;Zhao, Rui;;Zhou, Ying;;Ji, Hong Lei	1152	;;Wang, KW;;Wu, JQ;;Zhao, HX;;Li, YY;;Zhao, R;;Zhou, Y;;Ji, HL											10.1186/1471-2458-13-1152	Article		wujq1688@163.com		;;;;		;;National 12th Five-Year Plan [2012BAI32B08]; Xuhui District Scientific;;Technology Commission [YZ11-35-1]	;;We are grateful to our other project investigators, including;;interviewers and the study participants who received the study team with;;understanding and patience. This project was funded by the National 12th;;Five-Year Plan (No. 2012BAI32B08) and Xuhui District Scientific;;Technology Commission (No. YZ11-35-1).	AA7MI		;;TO-URBAN MIGRANTS; HIV-INFECTION; FACTORY-WORKERS; CONDOM USE;;;POPULATION; MIGRATION; VULNERABILITY; TRANSMISSION; RESIDENTS; KNOWLEDGE		BMC PUBLIC HEALTH	BMC Public Health	English		41		236 GRAYS INN RD, FLOOR 6, LONDON WC1X 8HL, ENGLAND	41982	10	LONDON		J	BIOMED CENTRAL LTD	2013		Wu, JQ (reprint author), Fudan Univ, Sch Publ Hlth, 138 Dong An Rd, Shanghai 200433, Peoples R China.				1471-2458	BMC PUBLIC HEALTH
A00062	;;Background: Recently, many scientists including bacteriologists have begun to focus on social aspects of antibiotic management especially the knowledge, attitude and practice (KAP) among the general population regarding antibiotic use. However, relatively few works have published on the relationship between KAP and medical education. In this study, we analyze the present status of Chinese medic…	;;Huang, Ying;;Gu, Jiarui;;Zhang, Mingyu;;Ren, Zheng;;Yang, Weidong;;Chen, Yang;;Fu, Yingmei;;Chen, Xiaobei;;Cals, Jochen W. L.;;Zhang, Fengmin	163	;;Huang, Y;;Gu, JR;;Zhang, MY;;Ren, Z;;Yang, WD;;Chen, Y;;Fu, YM;;Chen, XB;;Cals, JWL;;Zhang, FM										;;Anbiotics usage; KAP; Questionnaire survey; Medical students;;;Statistical analysis	10.1186/1472-6920-13-163	Article		fengminzhang@yahoo.com.cn		;;;;		;;National Natural Science Foundation of China [J0730858, 30700032,;;81101300]	;;This work was supported in part by grants from National Natural Science;;Foundation of China (J0730858, 30700032, 81101300). We also wish to;;express our sincere thanks to all the students who agreed to participate;;in this study.	272YA		;;RESPIRATORY-TRACT INFECTIONS; PUBLIC KNOWLEDGE; RESISTANCE; COMMUNITY;;;BEHAVIOR; CROSS; BELIEFS; PARENTS		BMC MED EDUC	BMC Med. Educ.	English		25		236 GRAYS INN RD, FLOOR 6, LONDON WC1X 8HL, ENGLAND	41982	9	LONDON		J	BIOMED CENTRAL LTD	2013		Zhang, FM (reprint author), Harbin Med Univ, Dept Microbiol, 157 Baojian Rd, Harbin 150081, Peoples R China.	Education & Educational Research			1472-6920	BMC MEDICAL EDUCATION
A00063	Several emotion eliciting models have been proposed in the literature, however most of them are still artificial models which ignore the biological basis. We propose an emotion (without awareness) eliciting model from visual stimuli, which is inspired by biology: we describe an emotion eliciting process that follows the circuits of emotion in the brain derived through the results of neuroscience …	;;Ren, Dongchun;;Wang, Peng;;Qiao, Hong;;Zheng, Suiwu		;;Ren, DC;;Wang, P;;Qiao, H;;Zheng, SW			328							;;Emotion eliciting model; Emotion-eliciting region; Emotional valence;;;Emotion circuits; Visual information	10.1016/j.neucom.2013.05.026	Article		hong.qiao@ia.ac.cn	336	;;;;		;;National Natural Science Foundation of China [61033011, 61210009,;;61101221, 61100098, 61105085]; National Key Technology RD Program;;[2012BAI34B02]	;;This work was supported in part by National Natural Science Foundation;;of China, under Grants 61033011, 61210009, 61101221, 61100098, and;;61105085, and in part by the National Key Technology R&D Program;;2012BAI34B02. The authors would like to thank the reviewers for their;;constructive comments. Special thanks are also extended to Professor;;Khan to improve the description of this paper.	229YM		;;ATTENTION; RECOGNITION; PERCEPTION; ACTIVATION; COGNITION; AMYGDALA;;;CORTEX; INTELLIGENCE; VALENCE; BRAIN		NEUROCOMPUTING	Neurocomputing	English		50		PO BOX 211, 1000 AE AMSTERDAM, NETHERLANDS	41982	9	AMSTERDAM		J	ELSEVIER SCIENCE BV	2013		Qiao, H (reprint author), Chinese Acad Sci, Inst Automat, State Key Lab Management & Control Complex Syst, Beijing 100190, Peoples R China.	Computer Science		SI	0925-2312	NEUROCOMPUTING
A00064		;;Jamison, Dean T.;;Summers, Lawrence H.;;Alleyne, George;;Arrow, Kenneth J.;;Berkley, Seth;;Binagwaho, Agnes;;Bustreo, Flavia;;Evans, David;;Feachem, Richard G. A.;;Frenk, Julio;;Ghosh, Gargee;;Goldie, Sue J.;;Guo, Yan;;Gupta, Sanjeev;;Horton, Richard;;Kruk, Margaret E.;;Mahmoud, Adel;;Mohohlo, Linah K.;;Ncube, Mthuli;;Pablos-Mendez, Ariel;;Reddy, K. Srinath;;Saxenian, Helen;;Soucat, Agnes;;Ullt…		;;Jamison, DT;;Summers, LH;;Alleyne, G;;Arrow, KJ;;Berkley, S;;Binagwaho, A;;Bustreo, F;;Evans, D;;Feachem, RGA;;Frenk, J;;Ghosh, G;;Goldie, SJ;;Guo, Y;;Gupta, S;;Horton, R;;Kruk, ME;;Mahmoud, A;;Mohohlo, LK;;Ncube, M;;Pablos-Mendez, A;;Reddy, KS;;Saxenian, H;;Soucat, A;;Ulltveit-Moe, KH;;Yamey, G			1898								10.1016/S0140-6736(13)62105-4	Review		yameyg@globalhealth.ucsf.edu	1955	;;;;		;;Bill & Melinda Gates Foundation (Seattle, WA, USA); NORAD (Oslo,;;Norway); DCPN project; Bill & Melinda Gates Foundation at the Department;;of Global Health of the University of Washington (Seattle, WA, USA);;;Harvard Global Health Institute (Cambridge, MA, USA); UK Department for;;International Development (London, UK)	;;The two main funders of the Commission were the Bill & Melinda Gates;;Foundation (Seattle, WA, USA) and NORAD (Oslo, Norway). Additional;;funding came from the DCPN project funded by the Bill & Melinda Gates;;Foundation and based at the Department of Global Health of the;;University of Washington (Seattle, WA, USA), the Harvard Global Health;;Institute (Cambridge, MA, USA), and the UK Departmen…	269DX		;;MIDDLE-INCOME COUNTRIES; SUB-SAHARAN AFRICA; SYSTEMATIC ANALYSIS;;;ECONOMIC-GROWTH; LIFE EXPECTANCY; CLIMATE-CHANGE; UNITED-STATES; 21;;REGIONS; CARE; DISEASE	9908	LANCET	Lancet	English		265		360 PARK AVE SOUTH, NEW YORK, NY 10010-1710 USA	41980	58	NEW YORK		J	ELSEVIER SCIENCE INC	2013		Yamey, G (reprint author), Global Hlth Grp, Evidence Policy Initiat, 50 Beale St,Suite 1200,Box 1224, San Francisco, CA 94105 USA.	General & Internal Medicine			0140-6736	LANCET
A00065	;;Objective: In China, despite a high coverage rate, health insurance is not used for all illness episodes. Our goal is to identify subjects' characteristics associated with insurance utilization and the association between utilization and medical expenditure.;;Methods: A survey was conducted in January and February of 2012. 2093 middle-aged and elderly subjects (45 years old and above) were surv…	;;Wang, Yu;;Jiang, Yan;;Li, Yang;;Wang, Xiaojun;;Ma, Chi;;Ma, Shuangge	e80978	;;Wang, Y;;Jiang, Y;;Li, Y;;Wang, XJ;;Ma, C;;Ma, SG											10.1371/journal.pone.0080978	Article		shuangge.ma@yale.edu		;;;;		;;Renmin University of China [12XNI003]; Yale MacMillan Center Faculty;;Research Grant	;;This study has been supported by Renmin University of China Scientific;;Research Project Funding: Policy Evaluation of Pension and Medical and;;Social Security in China (12XNI003) and Yale MacMillan Center Faculty;;Research Grant. The funders had no role in study design, data collection;;and analysis, decision to publish, or preparation of the manuscript.	273WJ		COOPERATIVE MEDICAL SCHEME; RURAL CHINA; COMMUNITY; COVERAGE; SERVICE	12	PLOS ONE	PLoS One	English		23		1160 BATTERY STREET, STE 100, SAN FRANCISCO, CA 94111 USA	41979	9	SAN FRANCISCO		J	PUBLIC LIBRARY SCIENCE	2013	Mashamba-Thompson, Tivani /B-6087-2014	Ma, SG (reprint author), Renmin Univ China, Sch Stat, Beijing, Peoples R China.	Science & Technology - Other Topics			1932-6203	PLOS ONE
A00066		Chen, Peijie		Chen, PJ			S1								10.1080/02701367.2013.851162	Editorial Material		chenpeijie@sus.edu.cn	S3	;;;;				266BM				RES Q EXERCISE SPORT	Res. Q. Exerc. Sport	English		11		4 PARK SQUARE, MILTON PARK, ABINGDON OX14 4RN, OXFORDSHIRE, ENGLAND	41979	3	ABINGDON		J	ROUTLEDGE JOURNALS, TAYLOR & FRANCIS LTD	2013		Chen, PJ (reprint author), Shanghai Univ Sport, 399 Chang Hai Rd, Shanghai 200438, Peoples R China.	Social Sciences - Other Topics; Psychology; Sport Sciences		SI	0270-1367	RESEARCH QUARTERLY FOR EXERCISE AND SPORT
A00067	Purpose: This study aimed to investigate the influence of childhood obesity on energetic cost during normal walking and to determine if obese children choose a walking strategy optimizing their gait pattern. Method: Sixteen obese children with no functional abnormalities were matched by age and gender with 16 normal-weight children. All participants were asked to walk along a nearly circular trac…	;;Huang, Liang;;Chen, Peijie;;Zhuang, Jie;;Zhang, Yanxin;;Walt, Sharon		;;Huang, L;;Chen, PJ;;Zhuang, J;;Zhang, YX;;Walt, S			S72							childhood obesity; gait; mechanical efficiency; metabolic rate	10.1080/02701367.2013.849159	Article		zhuangjiesh@163.com	S79	;;;;		Shanghai University of Sport	;;This study was partially supported by the Open Fund of the Shanghai;;University of Sport.	266BM		;;CENTER-OF-MASS; ENERGY-EXPENDITURE; CHILDHOOD OBESITY; PREFERRED SPEED;;;GAIT PARAMETERS; LEVEL WALKING; BIOMECHANICS; ADOLESCENTS; REQUIREMENTS;;;OVERWEIGHT		RES Q EXERCISE SPORT	Res. Q. Exerc. Sport	English		39		4 PARK SQUARE, MILTON PARK, ABINGDON OX14 4RN, OXFORDSHIRE, ENGLAND	41979	8	ABINGDON		J	ROUTLEDGE JOURNALS, TAYLOR & FRANCIS LTD	2013		Zhuang, J (reprint author), Shanghai Univ Sport, Sch Kinesiol, 650 Qingyuanhuan Rd, Shanghai 200438, Peoples R China.	Social Sciences - Other Topics; Psychology; Sport Sciences		SI	0270-1367	RESEARCH QUARTERLY FOR EXERCISE AND SPORT
A00068	Purpose: Although walking has been demonstrated as one of the best forms for promoting physical activity (PA), little is known about Chinese city children and youth's walking behavior. The purpose of this study was therefore to assess ambulatory PA behavior of Chinese city children and youth. Method: The daily steps of 2,751 children and youth (1,415 boys, 1,336 girls; aged 9 to 17 years old, M-a…	;;Quan, Minghui;;Chen, Peijie;;Zhuang, Jie;;Wang, Chao		;;Quan, MH;;Chen, PJ;;Zhuang, J;;Wang, C			S29							MVPA; physical activity; public health; surveillance	10.1080/02701367.2013.850999	Article		chenpeijie@sus.edu.cn	S40	;;;;				266BM		;;PHYSICAL-ACTIVITY GUIDELINES; DESCRIPTIVE EPIDEMIOLOGY; CHRONIC DISEASE;;;RISK; REACTIVITY		RES Q EXERCISE SPORT	Res. Q. Exerc. Sport	English		25		4 PARK SQUARE, MILTON PARK, ABINGDON OX14 4RN, OXFORDSHIRE, ENGLAND	41979	12	ABINGDON		J	ROUTLEDGE JOURNALS, TAYLOR & FRANCIS LTD	2013		Chen, PJ (reprint author), Shanghai Univ Sport, 399 Chang Hai Rd, Shanghai 200438, Peoples R China.	Social Sciences - Other Topics; Psychology; Sport Sciences		SI	0270-1367	RESEARCH QUARTERLY FOR EXERCISE AND SPORT
A00069	Purpose: This study set out to examine the relationship between step frequency and velocity to develop a step frequency-based equation to predict Chinese youth's energy expenditure (EE) during walking and running. Method: A total of 173 boys and girls aged 11 to 18 years old participated in this study. The participants walked and ran on a treadmill at speeds of 3km/hr, 4km/hr, 5km/hr, 6km/hr, 7km…	;;Sun, Bo;;Liu, Yu;;Li, Jing Xian;;Li, Haipeng;;Chen, Peijie		;;Sun, B;;Liu, Y;;Li, JX;;Li, HP;;Chen, PJ			S64							energy consumption; physical activity; regression equations; velocity	10.1080/02701367.2013.851155	Article		yuliu@sus.edu.cn	S71	;;;;		;;Ministry of Science and Technology of China [2009BAK62B02-002,;;2012BAK23B04]; Shanghai Committee of Science and Technology in China;;[11dz1503700]	;;This work was partly supported by the Supporting Programs of the;;Ministry of Science and Technology of China (2009BAK62B02-002 and;;2012BAK23B04) and the Shanghai Committee of Science and Technology in;;China (Grant No. 11dz1503700).	266BM		;;TREADMILL WALKING; PHYSICAL-ACTIVITY; CHILDREN; COST; SPEED; VALIDITY;;;GAIT; ACCELEROMETRY; ACCURACY; YOUNG		RES Q EXERCISE SPORT	Res. Q. Exerc. Sport	English		48		4 PARK SQUARE, MILTON PARK, ABINGDON OX14 4RN, OXFORDSHIRE, ENGLAND	41979	8	ABINGDON		J	ROUTLEDGE JOURNALS, TAYLOR & FRANCIS LTD	2013		Liu, Y (reprint author), Shanghai Univ Sport, Key Lab Exercise & Hlth Sci, Minist Educ, 650 Qing Yuan Huan Rd, Shanghai 200438, Peoples R China.	Social Sciences - Other Topics; Psychology; Sport Sciences		SI	0270-1367	RESEARCH QUARTERLY FOR EXERCISE AND SPORT
A00070	Purpose: The purpose of this study was to objectively assess levels of physical activity (PA) and sedentary behavior (SB) of Chinese city children and youth aged 9 to 17 years old using accelerometers and to examine their differences by gender, age, grade, and weight status. Method: The PA and SB of 2,163 students in 4th grade through 11th grade (M-age=160.87 +/- 27.00 months [13.41 +/- 2.25 year…	;;Wang, Chao;;Chen, Peijie;;Zhuang, Jie		;;Wang, C;;Chen, PJ;;Zhuang, J			S12							ActiGraph; MPA; MVPA; VPA	10.1080/02701367.2013.850993	Article		chenpeijie@sus.edu.cn	S28	;;;;				266BM		;;ACTIVITY PATTERNS; ADOLESCENTS; HEALTH; OVERWEIGHT; INACTIVITY;;;CHILDHOOD; MODERATE; TIME; AGE		RES Q EXERCISE SPORT	Res. Q. Exerc. Sport	English		38		4 PARK SQUARE, MILTON PARK, ABINGDON OX14 4RN, OXFORDSHIRE, ENGLAND	41979	17	ABINGDON		J	ROUTLEDGE JOURNALS, TAYLOR & FRANCIS LTD	2013		Chen, PJ (reprint author), Shanghai Univ Sport, 399 Chang Hai Rd, Shanghai 200438, Peoples R China.	Social Sciences - Other Topics; Psychology; Sport Sciences		SI	0270-1367	RESEARCH QUARTERLY FOR EXERCISE AND SPORT
A00071	Purpose: The psychometric profiles of the widely used International Physical Activity Questionnaire-Short Form (IPAQ-SF) in Chinese youth have not been reported. The purpose of this study was to examine the validity and reliability of the IPAQ-SF using a sample of Chinese youth. Method: One thousand and twenty-one youth (M-age=14.26 +/- 1.63 years, 52.8% boys) from 11 cities in China wore acceler…	;;Wang, Chao;;Chen, Peijie;;Zhuang, Jie		;;Wang, C;;Chen, PJ;;Zhuang, J			S80							accelerometer; adolescent; assessment; validation	10.1080/02701367.2013.850991	Article		chenpeijie@sus.edu.cn	S86	;;;;				266BM		VERSION		RES Q EXERCISE SPORT	Res. Q. Exerc. Sport	English		20		4 PARK SQUARE, MILTON PARK, ABINGDON OX14 4RN, OXFORDSHIRE, ENGLAND	41979	7	ABINGDON		J	ROUTLEDGE JOURNALS, TAYLOR & FRANCIS LTD	2013		Chen, PJ (reprint author), Shanghai Univ Sport, 399 Chang Hai Rd, Shanghai 200438, Peoples R China.	Social Sciences - Other Topics; Psychology; Sport Sciences		SI	0270-1367	RESEARCH QUARTERLY FOR EXERCISE AND SPORT
A00072	Purpose: The purpose of this study was to develop and cross-validate an equation based on ActiGraph accelerometer GT3X output to predict children and youth's energy expenditure (EE) of physical activity (PA). Method: Participants were 367 Chinese children and youth (179 boys and 188 girls, aged 9 to 17 years old) who wore 1 ActiGraph GT3X accelerometer on their right hip during the following test…	;;Zhu, Zheng;;Chen, Peijie;;Zhuang, Jie		;;Zhu, Z;;Chen, PJ;;Zhuang, J			S56							cross-cultural; physical activity; regression; validation	10.1080/02701367.2013.850989	Article		chenpeijie@sus.edu.cn	S63	;;;;				266BM		ADOLESCENT GIRLS; VALIDITY		RES Q EXERCISE SPORT	Res. Q. Exerc. Sport	English		16		4 PARK SQUARE, MILTON PARK, ABINGDON OX14 4RN, OXFORDSHIRE, ENGLAND	41979	8	ABINGDON		J	ROUTLEDGE JOURNALS, TAYLOR & FRANCIS LTD	2013		Chen, PJ (reprint author), Shanghai Univ Sport, 399 Chang Hai Rd, Shanghai 200438, Peoples R China.	Social Sciences - Other Topics; Psychology; Sport Sciences		SI	0270-1367	RESEARCH QUARTERLY FOR EXERCISE AND SPORT
A00073	Purpose: Many ActiGraph accelerometer cutoff points and equations have been developed to classify children and youth's physical activity (PA) into different intensity levels. Using a sample from the Chinese City Children and Youth Physical Activity Study, this study was to develop new ActiGraph cutoff points for moderate-to-vigorous physical activity (MVPA) and vigorous physical activity (VPA) fo…	;;Zhu, Zheng;;Chen, Peijie;;Zhuang, Jie		;;Zhu, Z;;Chen, PJ;;Zhuang, J			S4							ActiGraph; heart rate; physical activity assessment; validation	10.1080/02701367.2013.850919	Article		chenpeijie@sus.edu.cn	S11	;;;;				266BM		;;OPERATING CHARACTERISTIC CURVES; HEART-RATE RESERVE; ADOLESCENTS;;;CALIBRATION; EXERCISE; FITNESS; RESISTANCE; PROGRAM; POINTS; GIRLS		RES Q EXERCISE SPORT	Res. Q. Exerc. Sport	English		33		4 PARK SQUARE, MILTON PARK, ABINGDON OX14 4RN, OXFORDSHIRE, ENGLAND	41979	8	ABINGDON		J	ROUTLEDGE JOURNALS, TAYLOR & FRANCIS LTD	2013		Chen, PJ (reprint author), Shanghai Univ Sport, 399 Chang Hai Rd, Shanghai 200438, Peoples R China.	Social Sciences - Other Topics; Psychology; Sport Sciences		SI	0270-1367	RESEARCH QUARTERLY FOR EXERCISE AND SPORT
A00074	Purpose: The purpose of this study was to determine which method, individual information-centered (IIC) or group information-centered (GIC), is more efficient in recovering missing physical activity (PA) data. Method: A total of 2,758 Chinese children and youth aged 9 to 17 years old (1,438 boys and 1,320 girls) wore ActiGraph GT3X/GT3X+ accelerometers for 7 consecutive days. Those with no missin…	;;Zhuang, Jie;;Chen, Peijie;;Wang, Chao;;Jin, Jing;;Zhu, Zheng;;Zhang, Wenjie		;;Zhuang, J;;Chen, PJ;;Wang, C;;Jin, J;;Zhu, Z;;Zhang, WJ			S48							data analysis; imputation; replacement; simulation	10.1080/02701367.2013.851060	Article		chenpeijie@sus.edu.cn	S55	;;;;				266BM		DATA IMPUTATION; PEDOMETER DATA; CHILDREN; WALKING; MODELS; YOUTH		RES Q EXERCISE SPORT	Res. Q. Exerc. Sport	English		46		4 PARK SQUARE, MILTON PARK, ABINGDON OX14 4RN, OXFORDSHIRE, ENGLAND	41979	8	ABINGDON		J	ROUTLEDGE JOURNALS, TAYLOR & FRANCIS LTD	2013		Chen, PJ (reprint author), Shanghai Univ Sport, 399 Chang Hai Rd, Shanghai 200438, Peoples R China.	Social Sciences - Other Topics; Psychology; Sport Sciences		SI	0270-1367	RESEARCH QUARTERLY FOR EXERCISE AND SPORT
A00075	Purpose: The purpose of this study was to investigate the characteristics of missing physical activity (PA) data of children and youth. Method: PA data from the Chinese City Children and Youth Physical Activity Study (N=2,758; 1,438 boys and 1,320 girls; aged 9-17 years old) were used for the study. After the data were sorted by the weekday (WD) and recording day (RD), the missing ratio (MR) was …	;;Zhuang, Jie;;Chen, Peijie;;Wang, Chao;;Huang, Liang;;Zhu, Zheng;;Zhang, Wenjie;;Fan, Xiang		;;Zhuang, J;;Chen, P;;Wang, C;;Huang, L;;Zhu, Z;;Zhang, WJ;;Fan, X			S41							accelerometers; data analysis; imputation; recovery	10.1080/02701367.2013.851059	Article		chenpeijie@sus.edu.cn	S47	;;;;		;;Program for the New Century Excellent Talents in University (NCET),;;Ministry of Education of China	;;This study was also supported by Program for the New Century Excellent;;Talents in University (NCET), Ministry of Education of China.	266BM		ACCELEROMETER; OVERWEIGHT; ATTRITION; GIRLS; BOYS		RES Q EXERCISE SPORT	Res. Q. Exerc. Sport	English		20		4 PARK SQUARE, MILTON PARK, ABINGDON OX14 4RN, OXFORDSHIRE, ENGLAND	41979	7	ABINGDON		J	ROUTLEDGE JOURNALS, TAYLOR & FRANCIS LTD	2013		Chen, PJ (reprint author), Shanghai Univ Sport, 399 Chang Hai Rd, Shanghai 200438, Peoples R China.	Social Sciences - Other Topics; Psychology; Sport Sciences		SI	0270-1367	RESEARCH QUARTERLY FOR EXERCISE AND SPORT
A00076	This article reinforces the hypothesis that humans were well established in Europe by the time of the Jaramillo subchron (1.07-0.98 Ma). The lithic industry found in the Untermassfeld site demonstrates human occupation at 50 degrees N in Europe. This evidence extends human occupation beyond the Mediterranean, as do other sites such as Kozarnika Cave (1.6-1.4 Ma), Pont de Lavaud (1.1 Ma), and Happ…	;;Garcia, Joan;;Landeck, Guenter;;Martinez, Kenneth;;Carbonell, Eudald		;;Garcia, J;;Landeck, G;;Martinez, K;;Carbonell, E			73								10.1016/j.quaint.2013.03.005	Article		jgarc338@xtec.cat	93	;;;;		Generalitat de Catalunya (Catalan Government)	;;The fieldwork in Vallparadis was financed by the Generalitat de;;Catalunya (Catalan Government), under the supervision of the Department;;of Culture. We would like to thank Terrassa City Council (Ajuntament de;;Terrassa), the Rovira i Virgili University Foundation and the;;archaeological field-work team for their collaboration. We are grateful;;to J. Huth from Max Planck Institute Mainz (MPICH)…	263QY		;;LATE EARLY PLEISTOCENE; GUADIX-BAZA BASIN; EARLY HUMAN OCCUPATION; 1ST;;HUMAN OCCUPATION; GESHER BENOT YAAQOV; TE CAVE SITE; MIDDLE PLEISTOCENE;;;OLDUVAI GORGE; ARCHAEOLOGICAL-SITE; GRAN DOLINA		QUATERN INT	Quat. Int.	English		186		THE BOULEVARD, LANGFORD LANE, KIDLINGTON, OXFORD OX5 1GB, ENGLAND	41979	21	OXFORD		J	PERGAMON-ELSEVIER SCIENCE LTD	2013		Garcia, J (reprint author), Inst Catala Paleoecol Humana & Evolucio Social IP, IPHES, C Marcel Li Domingo S-N,Campus Sescelades URV,Edi, Tarragona 43007, Spain.	Physical Geography; Geology			1040-6182	QUATERNARY INTERNATIONAL
A00077	The Vallparadis site contains a long and continuous archaeological sequence dating to between the late Early Pleistocene and the first half of the Middle Pleistocene. Levels 10 and 10c (unit EVT7) have yielded abundant macrofauna and Mode 1 stone tools calibrated by paleomagnetism and by biostratigraphy to the upper limit of the Jaramillo subchron (0.98 Ma) and by U-series/ESR to 0.83 +/- 0.13 Ma…	;;Garcia, Joan;;Martinez, Kenneth;;Carbonell, Eudald		;;Garcia, J;;Martinez, K;;Carbonell, E			94								10.1016/j.quaint.2013.09.038	Article		jgarc338@xtec.cat	114	;;;;		Generalitat de Catalunya (Catalan Government)	;;The fieldwork in Vallparadis was financed by the Generalitat de;;Catalunya (Catalan Government), under the supervision of the Department;;of Culture. We would like to thank Terrassa City Council (Ajuntament de;;Terrassa), the Rovira i Virgili University Foundation and the;;archaeological field-work team for their collaboration. We are;;especially grateful to Policarpo Sanchez and Jaume Vilalta …	263QY		;;GUADIX-BAZA BASIN; EARLY HUMAN OCCUPATION; 1ST HUMAN OCCUPATION;;;SIERRA-DE-ATAPUERCA; LOIRE RIVER-BASIN; FUENTE NUEVA 3; TE CAVE SITE;;;GRAN-DOLINA; LITHIC INDUSTRY; ARCHAEOLOGICAL-SITE		QUATERN INT	Quat. Int.	English		119		THE BOULEVARD, LANGFORD LANE, KIDLINGTON, OXFORD OX5 1GB, ENGLAND	41979	21	OXFORD		J	PERGAMON-ELSEVIER SCIENCE LTD	2013		Garcia, J (reprint author), IPHES Inst Catala Paleoecol Humana & Evolucio Soc, C Marcel Li Domingo S-N,Campus Sescelades URV,Edi, Tarragona 43007, Spain.	Physical Geography; Geology			1040-6182	QUATERNARY INTERNATIONAL
A00078	The archaeological site at Vallparadis (Barcelona, Spain) contains a continuous archaeostratigraphic sequence that extends from the upper limit of the Jaramillo subchron (0.98 Ma) to the first half of the Middle Pleistocene (c. 0.6 Ma). Evidence of human occupation (lithic tools and cut-marks) has been identified in this sequence in the levels with reverse polarity from the Early Pleistocene (EVT…	;;Martinez, Kenneth;;Garcia, Joan;;Carbonell, Eudald		;;Martinez, K;;Garcia, J;;Carbonell, E			115								10.1016/j.quaint.2013.10.021	Article		jgarc338@xtec.cat	122	;;;;				263QY		;;1ST HUMAN OCCUPATION; ARCHAEOLOGICAL-SITE; IBERIAN PENINSULA; EUROPE;;;AFRICA; DISPERSAL; EVOLUTION; TERRASSA; ORIGIN; REGION		QUATERN INT	Quat. Int.	English		46		THE BOULEVARD, LANGFORD LANE, KIDLINGTON, OXFORD OX5 1GB, ENGLAND	41979	8	OXFORD		J	PERGAMON-ELSEVIER SCIENCE LTD	2013		Garcia, J (reprint author), Inst Catala Paleoecol Humana & Evolucio Social IP, IPHES, C Marcel Li Domingo S-N,Campus Sescelades URV,Edi, Tarragona 43007, Spain.	Physical Geography; Geology			1040-6182	QUATERNARY INTERNATIONAL
A00079	The Majiayao culture (5300-4000 cal BP) is the most important culture of the Neolithic period in Gansu and Qinghai Provinces, northwest China, but its development and external connections remain unclear. This paper examines changing spatial and temporal patterns of the Majiayao culture and its subsistence strategies in relation to climate change. The research employed GIS analysis of data from th…	;;Dong, Guanghui;;Wang, Lin;;Cui, Yifu;;Elston, Robert;;Chen, Fahu		;;Dong, GH;;Wang, L;;Cui, YF;;Elston, R;;Chen, FH			155								10.1016/j.quaint.2013.07.038	Article		ghdong@lzu.edu.cn	161	;;;;		;;Chinese Academy of Sciences [XDA05130601]; National Natural Science;;Foundation of China [41072123, 41271218, 41021091]; 111 Program of;;Chinese State Administration of Foreign Experts Affairs [B06026]	;;This research was supported by "Strategic Priority Research Program -;;Climate Change: Carbon Budget and Relevant Issues" of the Chinese;;Academy of Sciences (Grant No. XDA05130601), the National Natural;;Science Foundation of China (Grant Nos. 41072123, 41271218 and;;41021091), and 111 Program (#B06026) of Chinese State Administration of;;Foreign Experts Affairs. We thank two anonymous reviews…	263QY		;;CLASSIC MAYA CIVILIZATION; LATE HOLOCENE; LOESS PLATEAU; YR BP;;;COLLAPSE; PRECIPITATION		QUATERN INT	Quat. Int.	English		53		THE BOULEVARD, LANGFORD LANE, KIDLINGTON, OXFORD OX5 1GB, ENGLAND	41979	7	OXFORD		J	PERGAMON-ELSEVIER SCIENCE LTD	2013	Chen, Fahu/B-2788-2011	Dong, GH (reprint author), Lanzhou Univ, Res Sch Arid Environm & Climate Change, MOE Key Lab Western Chinas Environm Syst, South Tianshui Rd 222, Lanzhou 730000, Gansu, Peoples R China.	Physical Geography; Geology			1040-6182	QUATERNARY INTERNATIONAL
A00080	;;Background: Much of research on household catastrophic medical expenses in China has focused on less developed areas and little is known about this problem in more developed areas. This study aimed to analyse the incidence and determinants of catastrophic medical expenses in eastern China.;;Methods: Data were obtained from a health care utilization and expense survey of 11,577 households conduc…	;;Li, Xiaohong;;Shen, Jay J.;;Lu, Jun;;Wang, Ying;;Sun, Mei;;Li, Chengyue;;Chang, Fengshui;;Hao, Mo	506	;;Li, XH;;Shen, JJ;;Lu, J;;Wang, Y;;Sun, M;;Li, CY;;Chang, FS;;Hao, M											10.1186/1472-6963-13-506	Article		haomo03@fudan.edu.cn		;;;;		;;Major Research Projects from Ministry of Education [07JZD0017]; Ministry;;of Education of China [IRT0912]; National Natural Science Foundation of;;China [70733002, 70903014]; Health Research Special Funding from;;Ministry of Health [201002028]; Fudan University-"985 project";;[2011SHKXZD020]; China Scholarship Council	;;This study was funded by Major Research Projects from Ministry of;;Education [07JZD0017], Innovative Research Team in University from;;Ministry of Education of China [IRT0912], National Natural Science;;Foundation of China [70733002 and 70903014], Health Research Special;;Funding from Ministry of Health [201002028], Social Science Research;;Project from Fudan University-"985 project" phaseIII […	285CV		FINANCIAL PROTECTION; HEALTH EXPENDITURE; RURAL CHINA; CARE		BMC HEALTH SERV RES	BMC Health Serv. Res.	English		21		236 GRAYS INN RD, FLOOR 6, LONDON WC1X 8HL, ENGLAND	41978	9	LONDON		J	BIOMED CENTRAL LTD	2013		Hao, M (reprint author), Fudan Univ, Sch Publ Hlth, Res Inst Hlth Dev Strategies, Shanghai 200433, Peoples R China.	Health Care Sciences & Services			1472-6963	BMC HEALTH SERVICES RESEARCH
A00081	;;Background: We presented the pattern of health care consumption, and the utilization of available resources by describing the ecology of medical care in Beijing on a monthly basis and by describing the socio-demographic characteristics associated with receipt care in different settings.;;Methods: A cohort of 6,592 adults, 15 years of age and older were sampled to estimate the number of urban-re…	;;Shao, Shuang;;Zhao, FeiFei;;Wang, Jing;;Feng, Lei;;Lu, XiaoQin;;Du, Juan;;Yan, YuXiang;;Wang, Chao;;Fu, YingHong;;Wu, JingJing;;Yu, XinWei;;Khoo, KayKeng;;Wang, YouXin;;Wang, Wei		;;Shao, S;;Zhao, FF;;Wang, J;;Feng, L;;Lu, XQ;;Du, J;;Yan, YX;;Wang, C;;Fu, YH;;Wu, JJ;;Yu, XW;;Khoo, K;;Wang, YX;;Wang, W											10.1371/journal.pone.0082446	Article		wei.wang@ecu.edu.au		;;;;		;;China National "12th Five-Year" Plan for Science and Technology Support;;[2012BAI37B03]; China National High Technology Research and Development;;Program-863 [2006AA02Z434]; Australia-China Science Research Fund;;[ACSRF06444]; Importation and Development of High-Caliber Talents;;Project of Beijing Municipal Institutions, China	;;This work was financially supported by the grants from the China;;National "12th Five-Year" Plan for Science and Technology Support (Grant;;No: 2012BAI37B03), the China National High Technology Research and;;Development Program-863 (Grant No: 2006AA02Z434), and the;;Australia-China Science Research Fund (Grant No: ACSRF06444). WW is;;supported by the Importation and Development of High-Caliber …	273WD		;;TRADITIONAL CHINESE MEDICINE; SUBOPTIMAL HEALTH-STATUS; URBAN CHINESE;;;SYSTEM; SERVICES; WORKERS; EQUITY; ACCESS; REFORM	12	PLOS ONE	PLoS One	English		32		1160 BATTERY STREET, STE 100, SAN FRANCISCO, CA 94111 USA	41978	9	SAN FRANCISCO		J	PUBLIC LIBRARY SCIENCE	2013		Wang, W (reprint author), Capital Med Univ, Beijing Municipal Key Lab Clin Epidemiol, Sch Publ Hlth, Beijing, Peoples R China.	Science & Technology - Other Topics			1932-6203	PLOS ONE
A00082	Researchers have suggested that certain individuals may show a self-positivity bias, rating themselves as possessing more positive personality traits than others. Previous evidence has shown that people evaluate self-related information in such a way as to maintain or enhance self-esteem. However, whether self-esteem would modulate the time course of self-positivity bias in explicit self-evaluati…	;;Zhang, Hua;;Guan, Lili;;Qi, Mingming;;Yang, Juan	e81169	;;Zhang, H;;Guan, LL;;Qi, MM;;Yang, J											10.1371/journal.pone.0081169	Article		valleyqq@swu.edu.cn		;;;;		;;Fundamental Research Funds for the Central Universities [SWU1309105];;;Faculty of Psychology, Southwest University [TR201202-5]	;;This work was supported by the Fundamental Research Funds for the;;Central Universities (SWU1309105) and the Team Research Project of;;Faculty of Psychology, Southwest University (TR201202-5). The funders;;had no role in study design, data collection and analysis, decision to;;publish, or preparation of the manuscript.	273WD		;;EVENT-RELATED POTENTIALS; ENHANCEMENT; ATTENTION; STIMULI; ERP;;;RECOGNITION; RESPONSES; EMOTION; VALENCE	12	PLOS ONE	PLoS One	English		42		1160 BATTERY STREET, STE 100, SAN FRANCISCO, CA 94111 USA	41978	7	SAN FRANCISCO		J	PUBLIC LIBRARY SCIENCE	2013		Yang, J (reprint author), Southwest Univ, Minist Educ, Key Lab Cognit & Personal, Chongqing, Peoples R China.	Science & Technology - Other Topics			1932-6203	PLOS ONE
A00083	;;Background: The physical and mental health of college students tends to continuously decline around the world. Since they are in a significant transition period which presents opportunities and challenges in health promotion, it is important to improve their health in this period. As a traditional Chinese exercise form which combines movements with breath and mind, Baduanjin may be one of the s…	;;Zheng, Guohua;;Li, Moyi;;Lan, Xiulu;;Yan, Xinghui;;Lin, Qiu;;Chen, Lidian;;Tao, Jing;;Zheng, Xin;;Li, Junzhe;;Chen, Bai;;Fang, Qianying	422	;;Zheng, GH;;Li, MY;;Lan, XL;;Yan, XH;;Lin, Q;;Chen, LD;;Tao, J;;Zheng, X;;Li, JZ;;Chen, B;;Fang, QY										;;Baduanjin exercise; College students; Physical health; Mental health;;;Randomized controlled trial	10.1186/1745-6215-14-422	Article		lidianchen87@163.com		;;;;		;;Special Scientific Research Fund of Public Welfare Profession of China,;;Ministry of Science and Technology [201307004]; Ministry of Finance of;;the People's Republic of China; Rehabilitation Research Center of Fujian;;province; Rehabilitation Research Center for Traditional Chinese;;Medicine, State Administration of Traditional Chinese Medicine of the;;People's Republic of China	;;This study is funded by the Special Scientific Research Fund of Public;;Welfare Profession of China (Grant No. 201307004), Ministry of Science;;and Technology and Ministry of Finance of the People's Republic of;;China. It is supported by Rehabilitation Research Center of Fujian;;province and Rehabilitation Research Center for Traditional Chinese;;Medicine, State Administration of Traditional Ch…	276OG		;;SLEEP QUALITY INDEX; UNIVERSITY-STUDENTS; METABOLIC SYNDROME; PRIMARY;;INSOMNIA; HEALTH-BENEFITS; SELF-EFFICACY; UNITED-STATES; OF-LIFE;;;ADULTS; PREVALENCE		TRIALS	Trials	English		63		236 GRAYS INN RD, FLOOR 6, LONDON WC1X 8HL, ENGLAND	41978	9	LONDON		J	BIOMED CENTRAL LTD	2013		Chen, LD (reprint author), Fujian Univ Tradit Chinese Med, Fuzhou 350122, Peoples R China.	Research & Experimental Medicine			1745-6215	TRIALS
A00084	;;Background: Health professionals play a key role in the prevention and treatment of excess weight and obesity, but many have expressed a lack of confidence in their ability to manage obese patients with their delivery of weight-management care remaining limited. The specific mechanism underlying inadequate practices in professional weight management remains unclear. The primary purpose of this …	;;Zhu, Da Q.;;Norman, Ian J.;;While, Alison E.	131	;;Zhu, DQ;;Norman, IJ;;While, AE										Nurses; Self-efficacy; Weight management practices; Model testing	10.1186/1479-5868-10-131	Article		alison.while@kcl.ac.uk		;;;;				290WE		;;PRIMARY-CARE; OBESITY MANAGEMENT; PHYSICAL-ACTIVITY; ATTITUDES;;;OVERWEIGHT; BELIEFS; GUIDELINES; GPS		INT J BEHAV NUTR PHY	Int. J. Behav. Nutr. Phys. Act.	English		43		236 GRAYS INN RD, FLOOR 6, LONDON WC1X 8HL, ENGLAND	41977	11	LONDON		J	BIOMED CENTRAL LTD	2013		While, AE (reprint author), Kings Coll London, Florence Nightingale Sch Nursing & Midwifery, James Clerk Maxwell Bldg,Waterloo Rd, London WC2R 2LS, England.	Nutrition & Dietetics; Physiology			1479-5868	INTERNATIONAL JOURNAL OF BEHAVIORAL NUTRITION AND PHYSICAL ACTIVITY
A00085		;;Bednarz, Sarah Withan;;France, Derek;;Higgitt, David		;;Bednarz, SW;;France, D;;Higgitt, D			477								10.1080/03098265.2013.868081	Article		david.higgitt@nottingham.edu.cn	479	;;;;				269NH			4	J GEOGR HIGHER EDUC	J. Geogr. High. Educ.	English		1		4 PARK SQUARE, MILTON PARK, ABINGDON OX14 4RN, OXFORDSHIRE, ENGLAND	41977	3	ABINGDON		J	ROUTLEDGE JOURNALS, TAYLOR & FRANCIS LTD	2013		Higgitt, D (reprint author), Univ Nottingham Ningbo China, Dept Geog Sci, 199 Taikang East Rd, Ningbo 315100, Zhejiang, Peoples R China.	Education & Educational Research; Geography			0309-8265	JOURNAL OF GEOGRAPHY IN HIGHER EDUCATION
A00086	This study aims to develop and test the psychometric properties of the Chinese Health Literacy Scale for Chronic Care (CHLCC). This is a methodological study with a sample of 262 patients 65 years of age and older who had chronic illnesses. Pearson's correlation, independent sample t tests, and analyses of variance were used. The CHLCC showed a significant positive correlation with Chinese litera…	;;Leung, Angela Yee Man;;Cheung, Mike Kwun Ting;;Vivian Wei Qun Lou;;Felix Hon Wai Chan;;Ho, Celina Kit Yee;;Do, Tsui Ling;;Chan, Sophia Siu Chee;;Chi, Iris		;;Leung, AYM;;Cheung, MKT;;Lou, VWQ;;Chan, FHW;;Ho, CKY;;Do, TL;;Chan, SSC;;Chi, I			205								10.1080/10810730.2013.829138	Article		angleung@hku.hk	222	;;;;				228OZ		;;DISEASE-MANAGEMENT PROGRAM; SELF-MANAGEMENT; OUTCOMES; ADULTS;;;INSTRUMENT; SKILLS; QUALITY; RISK; TOOL		J HEALTH COMMUN	J. Health Commun.	English		55		325 CHESTNUT ST, SUITE 800, PHILADELPHIA, PA 19106 USA	41977	18	PHILADELPHIA		J	TAYLOR & FRANCIS INC	2013		Leung, AYM (reprint author), Univ Hong Kong, Fac Med Bldg, 4th Floor,William Mong Block,21 Sassoon Rd, Pokfulam, Hong Kong, Peoples R China.	Communication; Information Science & Library Science		SI	1081-0730	JOURNAL OF HEALTH COMMUNICATION
A00087	Zipf's law is the major regularity of statistical linguistics that has served as a prototype for rank-frequency relations and scaling laws in natural sciences. Here we show that Zipf's law-together with its applicability for a single text and its generalizations to high and low frequencies including hapax legomena-can be derived from assuming that the words are drawn into the text with random pro…	;;Allahverdyan, Armen E.;;Deng, Weibing;;Wang, Q. A.	62804	;;Allahverdyan, AE;;Deng, WB;;Wang, QA											10.1103/PhysRevE.88.062804	Article				;;;;		;;Region des Pays de la Loire [2010-11967]; National Natural Science;;Foundation of China [10975057, 10635020, 10647125, 10975062]; Programme;;of Introducing Talents of Discipline [B08033]; PHC CAI YUAN PEI;;Programme (LIU JIN OU) [6050, 2010008104]	;;We thank A. Galstyan and D. Manin for discussions. This work is;;supported by the Region des Pays de la Loire under Grant No. 2010-11967;;and by the National Natural Science Foundation of China (Grants No.;;10975057, No. 10635020, No. 10647125, and No. 10975062), the Programme;;of Introducing Talents of Discipline to Universities under Grant No.;;B08033, and the PHC CAI YUAN PEI Programme (LIU …	274KO		RANDOM TEXTS; WORD; FREQUENCY; EXHIBIT; ENTROPY; THEOREM	6	PHYS REV E	Phys. Rev. E	English		50		ONE PHYSICS ELLIPSE, COLLEGE PK, MD 20740-3844 USA	41976	10	COLLEGE PK		J	AMER PHYSICAL SOC	2013		Allahverdyan, AE (reprint author), ISMANS, Lab Phys Stat & Syst Complexes, 44 Ave Bartholdi, F-72000 Le Mans, France.	Physics			1539-3755	PHYSICAL REVIEW E
A00088	We assessed the influence of the Fukushima nuclear accident (FNA) on the Chinese public's attitude and acceptance of nuclear power plants in China. Two surveys (before and after the FNA) were administered to separate subsamples of residents near the Tianwan nuclear power plant in Lianyungang, China. A structural equation model was constructed to describe the public acceptance of nuclear power and…	;;Huang, Lei;;Zhou, Ying;;Han, Yuting;;Hammitt, James K.;;Bi, Jun;;Liu, Yang		;;Huang, L;;Zhou, Y;;Han, YT;;Hammitt, JK;;Bi, J;;Liu, Y			19742							public perception; nuclear risk; spatial distribution	10.1073/pnas.1313825110	Article		jbi@nju.edu.cn	19747	;;;;		;;Chinese Natural Sciences Foundation [41271014, 41171411]; 863 Program;;[2013AA06A309]; Collaborative Innovation Center for Regional;;Environmental Quality	;;This research was supported by the Chinese Natural Sciences Foundation;;(41271014 and 41171411), the 863 Program (2013AA06A309), and;;Collaborative Innovation Center for Regional Environmental Quality.	262OJ		;;CHERNOBYL ACCIDENT; LOCAL ACCEPTANCE; PERCEIVED RISKS; AIR-POLLUTION;;;ATTITUDES; BELIEFS; ENERGY; NORMS; SEX	49	P NATL ACAD SCI USA	Proc. Natl. Acad. Sci. U. S. A.	English		50		2101 CONSTITUTION AVE NW, WASHINGTON, DC 20418 USA	41976	6	WASHINGTON		J	NATL ACAD SCIENCES	2013		Bi, J (reprint author), Nanjing Univ, Sch Environm, State Key Lab Pollut Control & Resource Reuse, Nanjing 210023, Jiangsu, Peoples R China.	Science & Technology - Other Topics			0027-8424	;;PROCEEDINGS OF THE NATIONAL ACADEMY OF SCIENCES OF THE UNITED STATES OF;;AMERICA
A00089	One disadvantage of the JCR impact factor, the most commonly used assessment tool for ranking and evaluating scientific journals, is its inability in distinguishing among different shapes of citation distribution curves, leading to unfair evaluation of journals in some cases. This paper aims to put forward an alternative impact factor (IF') that can properly reflect citation distributions. The tw…	;;Yang, Zu-Guo;;Zhang, Chun-Ting		;;Yang, ZG;;Zhang, CT											10.1038/srep03410	Article		ctzhang@tju.edu.cn		;;;;		;;Research Foundation of the ISTIC-Thomson Reuters Joint Lab for;;Scientometrics Research [IT2010014]; National Social Science Foundation;;of China [11BTQ022]	;;We thank Dr. F Gao for the help in preparing Fig. 1 and Fig. 2. The;;present study was supported in part by the Research Foundation of the;;ISTIC-Thomson Reuters Joint Lab for Scientometrics Research (No.;;IT2010014) and National Social Science Foundation of China (No.;;11BTQ022), both to ZGY.	263CO		;;H-INDEX; HIRSCH-INDEX; CITATION DISTRIBUTIONS; JOURNALS; SCIENCE;;;OUTPUT; MODEL		SCI REP-UK	Sci Rep	English		34		MACMILLAN BUILDING, 4 CRINAN ST, LONDON N1 9XW, ENGLAND	41976	5	LONDON		J	NATURE PUBLISHING GROUP	2013		Zhang, CT (reprint author), Tianjin Univ, Dept Phys, Tianjin 300072, Peoples R China.	Science & Technology - Other Topics			2045-2322	SCIENTIFIC REPORTS
A00090	In this article, we provide some robust estimation of moments of the random effects and the errors in dynamic panel data models with potential intercorrelation. By differencing the residuals over the individual and time indies, we modify the popularly used Arellano-Bond GMM estimator of the parameter coefficient and study its asymptotic properties. Based on the modified parameter estimator, we co…	Wu, Jianhong		Wu, JH			4199							Dynamic panel data; Estimation of moment; Potential intercorrelation	10.1080/03610926.2011.654039	Article		wjhstat1@gmail.com	4209	;;;;		;;National Nature Science Foundation of China [11001238]; Specialized;;Research Fund for the Doctoral Program of Higher Education;;[20103326120002]; National Bureau of statistics of key projects;;[2012LZ023]; MOE Project of Key Research Institute of Humanities and;;Social Sciences at Universities [13JDD910002]; Zhejiang Provincial Key;;Research Base for Humanities and Social Science Research (Sta…	;;This article was supported in part by the National Nature Science;;Foundation of China (Grant No. 11001238), Specialized Research Fund for;;the Doctoral Program of Higher Education (Grant No. 20103326120002),;;National Bureau of statistics of key projects (Grant No. 2012LZ023), the;;MOE Project of Key Research Institute of Humanities and Social Sciences;;at Universities (Grant No. 13JDD910002),…	265CW		LINEAR MIXED MODELS	23	COMMUN STAT-THEOR M	Commun. Stat.-Theory Methods	English		10		325 CHESTNUT ST, SUITE 800, PHILADELPHIA, PA 19106 USA	41975	11	PHILADELPHIA		J	TAYLOR & FRANCIS INC	2013		Wu, JH (reprint author), Zhejiang Gongshang Univ, Sch Stat & Math, Hangzhou 310018, Zhejiang, Peoples R China.	Mathematics			0361-0926	COMMUNICATIONS IN STATISTICS-THEORY AND METHODS
A00091	In various environmental studies, spatiotemporal correlated data are involved, so there has been increasing demand of proposing spatiotemporal estimation methods that capture spatiotemporal correlation so as to improve the accuracy of estimation. In this article, we construct estimators for non grid spatiotemporal models with autoregressive errors. It is proved that the estimators are asymptotic …	;;Wang, Hongxia;;Wang, Jinde		;;Wang, HX;;Wang, JD			4259							;;Autoregressive errors; Local linear regression; Non grid spatiotemporal;;model	10.1080/03610926.2011.648796	Article		hxwang0101@yahoo.cn	4275	;;;;		;;Nation Science Foundation of China [11301073, 11171065, 11271067];;;Natural Science Foundation of Jiangsu Province [BK2011058]	;;We thank the editors and the referees for their insightful comments;;leading to a substantial improvement of the paper. This research was;;supported by the Nation Science Foundation of China (Grant No. 11301073,;;11171065, 11271067) and the Natural Science Foundation of Jiangsu;;Province (Grant No. BK2011058).	265CW		NONPARAMETRIC REGRESSION; SPATIAL REGRESSION; VARIABLE BANDWIDTH	23	COMMUN STAT-THEOR M	Commun. Stat.-Theory Methods	English		26		325 CHESTNUT ST, SUITE 800, PHILADELPHIA, PA 19106 USA	41975	17	PHILADELPHIA		J	TAYLOR & FRANCIS INC	2013		Wang, HX (reprint author), Southeast Univ, Dept Math, Nanjing 211189, Jiangsu, Peoples R China.	Mathematics			0361-0926	COMMUNICATIONS IN STATISTICS-THEORY AND METHODS
A00092	For a p-dimensional normal distribution with mean vector and covariance matrix Ip, it is known that the maximum likelihood estimator <^> of with p = 3 is inadmissible under the squared loss. The present article considers possible extensions of the result to the case where the loss is a member of a general class of the form L - Q , where L is non decreasing, - Q denotes the Mahalanobis distance - …	Lu, Chang-Yu		Lu, CY			4276							;;Admissibility; Least squares estimator; Universal domination; Stochastic;;domination	10.1080/03610926.2011.648788	Article		luchy@shfc.edu.cn	4286	;;;;		;;National Natural Science Foundation of China [10071011]; Shanghai;;Education Commission Foundation [3109726]	;;Project supported by the National Natural Science Foundation of;;China(10071011) and Project supported by Shanghai Education Commission;;Foundation (3109726). this article was finished when the author visit;;the Department of Statistics of the London School of Economics and;;Political Science.	265CW		;;LEAST-SQUARES ESTIMATOR; SCALE PARAMETER ESTIMATORS; CONFIDENCE SETS;;;PROSPECT-THEORY; DOMINANCE; ADMISSIBILITY; INADMISSIBILITY; INFERENCE;;;ORDER	23	COMMUN STAT-THEOR M	Commun. Stat.-Theory Methods	English		31		325 CHESTNUT ST, SUITE 800, PHILADELPHIA, PA 19106 USA	41975	11	PHILADELPHIA		J	TAYLOR & FRANCIS INC	2013		Lu, CY (reprint author), Shanghai Finance Univ, Inst Int Finance, Shanghai 201209, Peoples R China.	Mathematics			0361-0926	COMMUNICATIONS IN STATISTICS-THEORY AND METHODS
A00093	An important contribution to the literature on frequentist model averaging (FMA) is the work of Hjort and Claeskens (2003), who developed an asymptotic theory for frequentist model averaging in parametric models based on a local mis-specification framework. They also proposed a simple method for constructing confidence intervals of the unknown parameters. This article shows that the confidence in…	;;Wang, Haiying;;Zhou, Sherry Z. F.		;;Wang, HY;;Zhou, SZF			4342							;;Asymptotic equivalence; Confidence interval; Model averaging; Parametric;;model; Semi-parametric model	10.1080/03610926.2011.647218	Article		zhefzhou@cityu.edu.hk	4356	;;;;				265CW		;;FOCUSED INFORMATION CRITERION; LINEAR-MODELS; REGRESSION; SELECTION;;;INFERENCE	23	COMMUN STAT-THEOR M	Commun. Stat.-Theory Methods	English		34		325 CHESTNUT ST, SUITE 800, PHILADELPHIA, PA 19106 USA	41975	15	PHILADELPHIA		J	TAYLOR & FRANCIS INC	2013		Zhou, SZF (reprint author), City Univ Hong Kong, Dept Management Sci, Kowloon, Hong Kong, Peoples R China.	Mathematics			0361-0926	COMMUNICATIONS IN STATISTICS-THEORY AND METHODS
A00094	The present study investigated neural correlations underlying the psychological processing of stimuli with various degrees of self-relevance. Event-related potentials were recorded for names that differ in their extent of relevance to the study participant. Participants performed a three-stimulus oddball task. ERP results showed larger P2 averaged amplitudes for highly self-relevant names than fo…	;;Fan, Wei;;Chen, Jie;;Wang, Xiao-Yan;;Cai, Ronghua;;Tan, Qianbao;;Chen, Yun;;Yang, Qingsong;;Zhang, Shanming;;Wu, Yun;;Yang, Zilu;;Wang, Xi-Ai;;Zhong, Yiping	e80289	;;Fan, W;;Chen, J;;Wang, XY;;Cai, RH;;Tan, QB;;Chen, Y;;Yang, QS;;Zhang, SM;;Wu, Y;;Yang, ZL;;Wang, XA;;Zhong, YP											10.1371/journal.pone.0080289	Article		ypzhong@hunnu.edu.cn		;;;;		;;National Natural Science Foundation of China [31171003]; Specialized;;Research Fund for the Doctoral Program of Higher Education;;[20124306110010]; humanities and social science research planning fund;;project of Chinese Ministry of Education [13YJA190001]; Hunan Province;;graduate scientific research innovation project [CX2012B193]	;;The Project "Study on the Mechanism and Variability of Implicit;;Self-positivity Bias" is supported by National Natural Science;;Foundation of China (31171003). The study also was supported by a grant;;from the Specialized Research Fund for the Doctoral Program of Higher;;Education (20124306110010), the humanities and social science research;;planning fund project of Chinese Ministry of Educati…	265IN		;;SUBJECTS OWN NAME; TEMPORAL FEATURES; NEGATIVE STIMULI; ODDBALL TASK;;;ATTENTION; P300; FACE; ERP; RELEVANCE; NOVELTY	12	PLOS ONE	PLoS One	English		37		1160 BATTERY STREET, STE 100, SAN FRANCISCO, CA 94111 USA	41975	6	SAN FRANCISCO		J	PUBLIC LIBRARY SCIENCE	2013		Zhong, YP (reprint author), Hunan Normal Univ, Dept Psychol, Changsha, Hunan, Peoples R China.	Science & Technology - Other Topics			1932-6203	PLOS ONE
A00095	This study investigated whether semantic integration in discourse context could be influenced by topic structure using event-related brain potentials. Participants read discourses in which the last sentence contained a critical word that was either congruent or incongruent with the topic established in the first sentence. The intervening sentences between the first and the last sentence of the di…	;;Yang, Xiaohong;;Chen, Xuhai;;Chen, Shuang;;Xu, Xiaoying;;Yang, Yufang	e79734	;;Yang, XH;;Chen, XH;;Chen, S;;Xu, XY;;Yang, YF											10.1371/journal.pone.0079734	Article		yangyf@psych.ac.cn		;;;;		;;Scientific Research Foundation for Young Scientists, Institute of;;Psychology, Chinese Academic of Sciences [Y1CX322005]; National Natural;;Science Foundation of China [31070989]; K. C. Wong Education Foundation,;;Hong Kong	;;This research was supported by the Scientific Research Foundation for;;Young Scientists, Institute of Psychology, Chinese Academic of Sciences;;(Y1CX322005), the National Natural Science Foundation of China;;(31070989), and K. C. Wong Education Foundation, Hong Kong. The funders;;had no role in study design, data collection and analysis, decision to;;publish, or preparation of the manuscript.	265IN		;;EYE-MOVEMENTS; PRAGMATIC ANOMALIES; BRAIN POTENTIALS; DISCOURSE; N400;;;P600; COMPREHENSION; SENTENCE; ERP; ACCESSIBILITY	12	PLOS ONE	PLoS One	English		42		1160 BATTERY STREET, STE 100, SAN FRANCISCO, CA 94111 USA	41975	7	SAN FRANCISCO		J	PUBLIC LIBRARY SCIENCE	2013			Science & Technology - Other Topics			1932-6203	PLOS ONE
A00096	Individuals from East Asian (Chinese) backgrounds have been shown to exhibit greater sensitivity to a speaker's perspective than Western (U.S.) participants when resolving referentially ambiguous expressions. We show that this cultural difference does not reflect better integration of social information during language processing, but rather is the result of differential correction: in the earlie…	;;Wu, Shali;;Barr, Dale J.;;Gann, Timothy M.;;Keysar, Boaz		;;Wu, SL;;Barr, DJ;;Gann, TM;;Keysar, B										;;perspective taking; comprehension; cultural differences; ambiguity;;;reference	10.3389/fnhum.2013.00822	Article		shalichina@gmail.com; dale.barr@glasgow.ac.uk		;;;;		;;National Science Foundation of China [71002014, 71110107027]; University;;of Chicago's Wisdom Research Project; John Temple ton Foundation	;;This research was supported by National Science Foundation of China;;Grants 71002014 and 71110107027 to Shah Wu, Boaz Keysar also received;;partial support from a grant from the University of Chicago's Wisdom;;Research Project and the John Temple ton Foundation.	268CS		LANGUAGE COMPREHENSION; SPOKEN LANGUAGE; SELF; MIND; CHINESE		FRONT HUM NEUROSCI	Front. Hum. Neurosci.	English		27		PO BOX 110, LAUSANNE, 1015, SWITZERLAND	41975	7	LAUSANNE		J	FRONTIERS RESEARCH FOUNDATION	2013		Wu, SL (reprint author), Kyung Hee Univ, Sch Management, 1 Hoegi Dong, Seoul 130701, South Korea.	Neurosciences & Neurology; Psychology			1662-5161	FRONTIERS IN HUMAN NEUROSCIENCE
A00097	This article presents the design of iReminder, an intuitive location-based reminder that delivers reminding messages based on users' future routes. iReminder is implemented on mobile phones, and it can predict users' future routes by collecting their daily trajectory data. Then it delivers a reminding message via the mobile phone when it senses that the user is going to the task location. A field…	;;Tu, You;;Chen, Ling;;Lv, Mingqi;;Ye, Youbiao;;Huang, Weikai;;Chen, Gencai		;;Tu, Y;;Chen, L;;Lv, MQ;;Ye, YB;;Huang, WK;;Chen, GC			838								10.1080/10447318.2013.796440	Article		lingchen@cs.zju.edu.cn	850	;;;;		;;Ministry of Industry and Information Technology of China;;[2010ZX01042-002-003-001]; Natural Science Foundation of China;;[61202282, 60703040]; Zhejiang Provincial Natural Science Foundation of;;China [LY12F02046]; Science and Technology Department of Zhejiang;;Province [2007C13019, 2011C13042]	;;This work was funded by the Ministry of Industry and Information;;Technology of China (No. 2010ZX01042-002-003-001), the Natural Science;;Foundation of China (Nos. 61202282 and 60703040), the Zhejiang;;Provincial Natural Science Foundation of China (No. LY12F02046), the;;Science and Technology Department of Zhejiang Province (Nos. 2007C13019;;and 2011C13042). We thank all the participants for a…	221PQ		PATTERNS	12	INT J HUM-COMPUT INT	Int. J. Hum.-Comput. Interact.	English		31		520 CHESTNUT STREET, STE 850, PHILADELPHIA, PA 19106 USA	41975	13	PHILADELPHIA		J	TAYLOR & FRANCIS INC	2013		Chen, L (reprint author), Zhejiang Univ, Coll Comp Sci, 38 Zheda Rd, Hangzhou 310027, Zhejiang, Peoples R China.	Computer Science; Engineering			1044-7318	INTERNATIONAL JOURNAL OF HUMAN-COMPUTER INTERACTION
A00098	The first decade of the 21st century witnessed great change in China and in its family law also. The Third Judicial Interpretation of the Marriage Law of the PRC became effective on 13 August 2011. The author explores the background of the new judicial interpretation and its achievements including strengthening the protection of the vulnerable in the family, further clarifying the position of sep…	Shi, Lei		Shi, L			381								10.1093/lawfam/ebt010	Article			398	;;;;				AO5KA		CHINA	3	INT J LAW POLICY FAM	Int. J. Law Policy Fam.	English		19		GREAT CLARENDON ST, OXFORD OX2 6DP, ENGLAND	DEC	18	OXFORD		J	OXFORD UNIV PRESS	2013		Shi, L (reprint author), Southwest Univ Polit Sci & Law SWUPL, Appl Law Sch, Chongqing, Peoples R China.	Family Studies; Government & Law			1360-9939	INTERNATIONAL JOURNAL OF LAW POLICY AND THE FAMILY
A00099	This article reports on a descriptive and explanatory study of nominalization as a feature of translators' styles in two English versions of the Chinese novel Hong Lou Meng. This study follows Lees in defining English nominalization as a nominalized transformation of a finite verbal form, associated with the manifestation of implicitation in translation. It uses Mathesius' complex condensation to…	Hou, Yu		Hou, Y			556							nominalization; translator's style; condensation; implicitation		Article		houyu@ysu.edu.cn	573	;;;;				AO3IA			3	META	Meta	English		39		PO BOX 6128, SUCCURSALE A, MONTREAL, QUEBEC H3C 3J7, CANADA	DEC	18	MONTREAL		J	PRESSES UNIV MONTREAL	2013		Hou, Y (reprint author), Yanshan Univ, Qinhuangdao, Peoples R China.	Linguistics			0026-0452	META
A00100	This paper presents an overview of the compilation of the Chinese-English Conference Interpreting Corpus followed by an outline of research findings based on data obtained from the corpus. It is argued that interpreting corpora, including the Chinese-English Conference Interpreting Corpus, are called to play an increasingly important role in the study of linguistic features of interpreted texts, …	;;Hu, Kaibao;;Tao, Qing		;;Hu, KB;;Tao, Q			626							;;Chinese-English conference interpreting; interpreting corpora;;;compilation; uses; limitations		Article		kbhu@sjtu.edu.cn; taoqing@sjtu.edu.cn	642	;;;;				AO3IA			3	META	Meta	English		23		PO BOX 6128, SUCCURSALE A, MONTREAL, QUEBEC H3C 3J7, CANADA	DEC	17	MONTREAL		J	PRESSES UNIV MONTREAL	2013		Hu, KB (reprint author), Shanghai Jiao Tong Univ, Shanghai 200030, Peoples R China.	Linguistics			0026-0452	META
A00101	This article analyzes the value chain for Chinese manufactured goods such as garments and textiles sold in sub-Saharan Africa. It explores the opportunities for Africans with small, private businesses in the export trade from China, the potential for long-term business development, and how strategies of engagement have changed over time. It finds that the value chains for low-cost goods vary. The…	;;Lyons, Michal;;Brown, Alison;;Li, Zhigang		;;Lyons, M;;Brown, A;;Li, ZG			77							China-Africa trade; value chains; informal economy	10.1017/asr.2013.80	Article		BrownAM@Cardiff.ac.uk; lizhig@mail.sysu.edu.cn	100	;;;;				AN8BB		CLUSTERS; EXPORTS	3	AFR STUD REV	Afr. Stud. Rev.	English		32		32 AVENUE OF THE AMERICAS, NEW YORK, NY 10013-2473 USA	DEC	24	NEW YORK		J	CAMBRIDGE UNIV PRESS	2013			Area Studies			0002-0206	AFRICAN STUDIES REVIEW
A00102	;;Introduction: This study investigated the current state of attitudes, behaviors, and knowledge concerning sex and sexually transmitted infections (STIs) among Chinese university students.;;Methodology: A cross-sectional anonymous university intranet-based survey was given to students attending the Shantou University, Guangdong, China using a 28-item questionnaire.;;Results: Of 3425 website visi…	;;Zhang, Dangui;;Pan, Hui;;Cui, Binglin;;Law, Frieda;;Farrar, Jeremy;;Ba-Thein, William		;;Zhang, DG;;Pan, H;;Cui, BL;;Law, F;;Farrar, J;;Ba-Thein, W			966							;;questionnaire survey; sexually transmitted disease; sexual;;misconception; Chinese university students	10.3855/jidc.3872	Article		wbathein@stu.edu.cn	974	;;;;		;;Shantou University Medical College; Li Ka Shing Foundation-University of;;Oxford Global Health Programme [B9RSRT0-14]	;;The authors like to thank student participants, Dr. Yuanchun Huang and;;Dr. Xiaoyang Jiao of the first affiliated hospital of SUMC for helping;;with the questionnaire translation, STU student volunteers for taking;;part in pilot testing, and Cyrille Cartier (former Associate Professor;;of School of Journalism and Communication) for inspiration for this;;study. This study was supported by the Sh…	AM4VC		;;KOREAN COLLEGE-STUDENTS; KNOWLEDGE; ATTITUDES; EDUCATION; INTENTION;;;DISEASES	12	J INFECT DEV COUNTR	J. Infect. Dev. Ctries.	English		30		;;JIDC CENT OFF PORTO CONTE RICERCHE RES CTR, S P 55, PORTO CONTE CAPO;;CACCIA KM 8.400 LOC, TRAMANIGLIO, 07041, ITALY	DEC	9	TRAMANIGLIO		J	J INFECTION DEVELOPING COUNTRIES	2013		Ba-Thein, W (reprint author), Shantou Univ, Coll Med, Dept Microbiol & Immunol, Shantou 515041, Guangdong, Peoples R China.	Infectious Diseases			1972-2680	JOURNAL OF INFECTION IN DEVELOPING COUNTRIES
A00103	;;Objectives To study the demography, clinical characteristics, service utilisation, mortality, and predictors of mortality in older residential care home residents with advanced cognitive impairment.;;Design Cohort longitudinal study.;;Setting Residential care homes for the elderly in Hong Kong West.;;Participants Residents of such homes aged 65 years or more with advanced cognitive impairment.;…	;;Luk, James K. H.;;Chan, W. K.;;Ng, W. C.;;Chiu, Patrick K. C.;;Ho, Celina;;Chan, T. C.;;Chan, Felix H. W.		;;Luk, JKH;;Chan, WK;;Ng, WC;;Chiu, PKC;;Ho, C;;Chan, TC;;Chan, FHW			518							;;Cognition disorders; Frail elderly; Homes for the aged; Long-term care;;;Mortality		Article		lukkh@ha.org.hk	524	;;;;				AM4VH		;;LONG-TERM-CARE; OF-LIFE CARE; ADVANCED DEMENTIA; NURSING-HOME; INFLUENZA;;VACCINATION; HOSPITAL READMISSION; MEDICAL PATIENTS; END	6	HONG KONG MED J	Hong Kong Med. J.	English		33		10/F, 99 WONG CHUK HANG RD, ABERDEEN, HONG KONG, 00000, PEOPLES R CHINA	DEC	7	HONG KONG		J	HONG KONG ACAD MEDICINE PRESS	2013		Luk, JKH (reprint author), Fung Yiu King Hosp, Dept Med & Geriatr, 9 Sandy Bay Rd, Pokfulam, Hong Kong, Peoples R China.	General & Internal Medicine			1024-2708	HONG KONG MEDICAL JOURNAL
A00104	The question of the nature of traditional Eastern and Western societies has historically attracted a high degree of interest among academic circles. Chinese scholars generally acknowledge that there are great disparities between traditional Eastern and Western societies, yet for a long time they have emphasized only Marx's theory of production relations and have not given weight to his theory of …	Wang Jiafeng		Wang, JF			7								10.2753/CSH0009-4633470201	Article			20	;;;;				AI6YJ			2	CHINESE STUD HIST	Chin. Stud. Hist.	English		26		80 BUSINESS PARK DR, ARMONK, NY 10504 USA	WIN	14	ARMONK		J	M E SHARPE INC	2013		Wang, JF (reprint author), Zhejiang Normal Univ, Jinhua, Peoples R China.	History; Asian Studies			0009-4633	CHINESE STUDIES IN HISTORY
A00105	Due to its late start and the impact of outside influences, modernization in China has always been inseparably tied to capitalism. During the early stages of modernization, the primary issue was how feudal forces could identify with and accept capitalism; in later stages, the question has been how socialism can exploit capitalism. The manner in which the relationship with capitalism has been hand…	Du Yanhua		Du, YH			40								10.2753/CSH0009-4633470203	Article			51	;;;;				AI6YJ			2	CHINESE STUD HIST	Chin. Stud. Hist.	English		9		80 BUSINESS PARK DR, ARMONK, NY 10504 USA	WIN	12	ARMONK		J	M E SHARPE INC	2013		Du, YH (reprint author), Fudan Univ, Shanghai 200433, Peoples R China.	History; Asian Studies			0009-4633	CHINESE STUDIES IN HISTORY
A00106	Capitalism has never been a pure, homogeneous social form. Many noncapitalist elements exist within capitalist societies. Family farming and the "peasant mode of production" should both be categorized as noncapitalist elements. In the modern world of highspeed industrializing development, agriculture without industrialization is impossible. Around the world, agriculture is or is about to become a…	Dong Zhenghua		Dong, ZH			52								10.2753/CSH0009-4633470204	Article			70	;;;;				AI6YJ			2	CHINESE STUD HIST	Chin. Stud. Hist.	English		24		80 BUSINESS PARK DR, ARMONK, NY 10504 USA	WIN	19	ARMONK		J	M E SHARPE INC	2013		Dong, ZH (reprint author), Peking Univ, Beijing, Peoples R China.	History; Asian Studies			0009-4633	CHINESE STUDIES IN HISTORY
A00107	Scholars discuss the issues raised in Qin Hui's recent book, Seeking a Common Baseline, a study of how China's rapid industrialization and urbanization is affecting its peasants.	Ping, Jiang		Ping, J			71								10.2753/CSH0009-4633470205	Article			91	;;;;				AI6YJ			2	CHINESE STUD HIST	Chin. Stud. Hist.	English		0		80 BUSINESS PARK DR, ARMONK, NY 10504 USA	WIN	21	ARMONK		J	M E SHARPE INC	2013		Ping, J (reprint author), China Univ Polit Sci & Law, Beijing, Peoples R China.	History; Asian Studies			0009-4633	CHINESE STUDIES IN HISTORY
A00108		Zheng, Haicui		Zheng, HC			779									Book Review			781	;;;;				257XQ			6	DISCOURSE STUD	Discourse Stud.	English		3		1 OLIVERS YARD, 55 CITY ROAD, LONDON EC1Y 1SP, ENGLAND	DEC	3	LONDON		J	SAGE PUBLICATIONS LTD	2013		Zheng, HC (reprint author), Inner Mongolia Univ, Sch Foreign Languages, Hohhot, Peoples R China.	Communication			1461-4456	DISCOURSE STUDIES
A00109		Blusse, Leonard		Blusse, L			14								10.1017/S0165115313000776	Article			29	;;;;				AI0EH			3	ITINERARIO	Itinerario	English		39		EDINBURGH BLDG, SHAFTESBURY RD, CB2 8RU CAMBRIDGE, ENGLAND	DEC	16	CAMBRIDGE		J	CAMBRIDGE UNIV PRESS	2013		Blusse, L (reprint author), Leiden Univ, NL-2300 RA Leiden, Netherlands.	History		SI	0165-1153	;;ITINERARIO-INTERNATIONAL JOURNAL ON THE HISTORY OF EUROPEAN EXPANSION;;AND GLOBAL INTERACTION
A00110		Dong Shaoxin		Dong, SX			70								10.1017/S016511531300082X	Article			74	;;;;				AI0EH			3	ITINERARIO	Itinerario	English		4		EDINBURGH BLDG, SHAFTESBURY RD, CB2 8RU CAMBRIDGE, ENGLAND	DEC	5	CAMBRIDGE		J	CAMBRIDGE UNIV PRESS	2013		Dong, SX (reprint author), Fudan Univ, Natl Inst Adv Humanistic Studies, Shanghai 200433, Peoples R China.	History		SI	0165-1153	;;ITINERARIO-INTERNATIONAL JOURNAL ON THE HISTORY OF EUROPEAN EXPANSION;;AND GLOBAL INTERACTION
A00111	During 1980-2000, an average of 310 companies per year went public in the United States. Since 2000, the average has been only 99 initial public offerings (IPOs) per year, with the drop especially precipitous among small firms. Many have blamed the Sarbanes-Oxley Act of 2002 and the 2003 Global Settlement's effects on analyst coverage for the decline in IPO activity. We find very little support f…	;;Gao, Xiaohui;;Ritter, Jay R.;;Zhu, Zhongyan		;;Gao, XH;;Ritter, JR;;Zhu, ZY			1663								10.1017/S0022109014000015	Article		;;xiaohui@rhsmith.umd.edu; jay.ritter@warrington.ufl.edu;;;zhongyan@cuhk.edu.hk	1692	;;;;				AI0EQ		;;INITIAL PUBLIC OFFERINGS; VENTURE CAPITALISTS; RADICAL INNOVATION;;;MARKET; RECOMMENDATIONS; PERFORMANCE; EARNINGS; COVERAGE; CYCLES; CHOICE	6	J FINANC QUANT ANAL	J. Financ. Quant. Anal.	English		45		32 AVENUE OF THE AMERICAS, NEW YORK, NY 10013-2473 USA	DEC	30	NEW YORK		J	CAMBRIDGE UNIV PRESS	2013		Gao, XH (reprint author), Univ Maryland, Smith Sch Business, 4426 Van Munching Hall, College Pk, MD 20742 USA.	Business & Economics			0022-1090	JOURNAL OF FINANCIAL AND QUANTITATIVE ANALYSIS
A00112	;;Objective To construct and validate billing code algorithms for identifying patients with peripheral arterial disease (PAD).;;Methods We extracted all encounters and line item details including PAD-related billing codes at Mayo Clinic Rochester, Minnesota, between July 1, 1997 and June 30, 2008; 22 712 patients evaluated in the vascular laboratory were divided into training and validation sets.…	;;Fan, Jin;;Arruda-Olson, Adelaide M.;;Leibson, Cynthia L.;;Smith, Carin;;Liu, Guanghui;;Bailey, Kent R.;;Kullo, Iftikhar J.		;;Fan, J;;Arruda-Olson, AM;;Leibson, CL;;Smith, C;;Liu, GH;;Bailey, KR;;Kullo, IJ			E349								10.1136/amiajnl-2013-001827	Article		kullo.iftikhar@mayo.edu	E354	;;;;		;;National Human Genome Research Institute [HG06379]; Chinese PLA General;;Hospital Young Scientist Training Program; National Institute on Aging;;of the National Institutes of Health [R01AG034676]	;;This work was supported by grant HG06379 from the National Human Genome;;Research Institute. JF was supported by Chinese PLA General Hospital;;Young Scientist Training Program. This study was made possible using the;;resources of the Rochester Epidemiology Project, which is supported by;;the National Institute on Aging of the National Institutes of Health;;under Award Number R01AG034676. The co…	AI0EA		;;ROCHESTER EPIDEMIOLOGY PROJECT; MEDICAL-RECORDS-LINKAGE;;;MYOCARDIAL-INFARCTION; DIAGNOSTIC CODES; PREDICTIVE-VALUE;;;LOWER-EXTREMITY; INTERVENTIONS; ASSOCIATION; POPULATION; VALIDATION	E2	J AM MED INFORM ASSN	J. Am. Med. Inf. Assoc.	English		28		BRITISH MED ASSOC HOUSE, TAVISTOCK SQUARE, LONDON WC1H 9JR, ENGLAND	DEC	6	LONDON		J	BMJ PUBLISHING GROUP	2013		Kullo, IJ (reprint author), Mayo Clin, Div Cardiovasc Dis, 200 First St SW, Rochester, MN 55905 USA.	;;Computer Science; Health Care Sciences & Services; Information Science &;;Library Science; Medical Informatics			1067-5027	JOURNAL OF THE AMERICAN MEDICAL INFORMATICS ASSOCIATION
A00113	Reliability and external validity are two fundamental values that pose incompatible constraints on neurobiological experiments. The more reliability an experimental result achieves, the less external validity it earns, and vice versa. In this article, I propose an externalist interpretation of external validity: the external validity of an experimental result depends not only on how much complexi…	Yan, Wong Muk		Yan, WM			429								10.1080/02698595.2013.868188	Article		mywong@hsmc.edu.hk	446	;;;;				AF9DH		;;LONG-TERM-MEMORY; SOCIAL RECOGNITION; CHRONIC FLUOXETINE;;;PROTEIN-SYNTHESIS; GENE-EXPRESSION; ANIMAL-MODEL; HIPPOCAMPUS; MICE;;;NEUROGENESIS; BEHAVIOR	4	INT STUD PHILOS SCI	Int. Stud. Philos. Sci.	English		28		4 PARK SQUARE, MILTON PARK, ABINGDON OX14 4RN, OXFORDSHIRE, ENGLAND	41974	18	ABINGDON		J	ROUTLEDGE JOURNALS, TAYLOR & FRANCIS LTD	2013		Yan, WM (reprint author), Hang Seng Management Coll, Dept Gen Educ, Shatin, Hong Kong, Peoples R China.	History & Philosophy of Science			0269-8595	INTERNATIONAL STUDIES IN THE PHILOSOPHY OF SCIENCE
A00114		Liu Wennan		Liu, WN			913									Book Review			916	;;;;				AF8OB			4	J WORLD HIST	J. World Hist.	English		1		2840 KOLOWALU ST, HONOLULU, HI 96822 USA	DEC	4	HONOLULU		J	UNIV HAWAII PRESS	2013		Liu, WN (reprint author), Chinese Acad Social Sci, Beijing, Peoples R China.	History			1045-6007	JOURNAL OF WORLD HISTORY
A00115		Liu Zehua		Liu, ZH			21								10.2753/CSP1097-1467450201	Article			31	;;;;				AF1WS			41673	CONTEMP CHIN THOUGHT	Contemp. Chin. Thought	English		2		80 BUSINESS PARK DR, ARMONK, NY 10504 USA	WIN	11	ARMONK		J	M E SHARPE INC	2013		Liu, ZH (reprint author), Nankai Univ, Tianjin 300071, Peoples R China.	Asian Studies; Philosophy			1097-1467	CONTEMPORARY CHINESE THOUGHT
A00116		Liu Zehua		Liu, ZH			32								10.2753/CSP1097-1467450202	Article			54	;;;;				AF1WS			41673	CONTEMP CHIN THOUGHT	Contemp. Chin. Thought	English		2		80 BUSINESS PARK DR, ARMONK, NY 10504 USA	WIN	23	ARMONK		J	M E SHARPE INC	2013		Liu, ZH (reprint author), Nankai Univ, Tianjin 300071, Peoples R China.	Asian Studies; Philosophy			1097-1467	CONTEMPORARY CHINESE THOUGHT
A00117		Liu Zehua		Liu, ZH			55								10.2753/CSP1097-1467450203	Article			88	;;;;				AF1WS			41673	CONTEMP CHIN THOUGHT	Contemp. Chin. Thought	English		7		80 BUSINESS PARK DR, ARMONK, NY 10504 USA	WIN	34	ARMONK		J	M E SHARPE INC	2013		Liu, ZH (reprint author), Nankai Univ, Tianjin 300071, Peoples R China.	Asian Studies; Philosophy			1097-1467	CONTEMPORARY CHINESE THOUGHT
A00118		Liu Zehua		Liu, ZH			89								10.2753/CSP1097-1467450204	Article			116	;;;;				AF1WS			41673	CONTEMP CHIN THOUGHT	Contemp. Chin. Thought	English		4		80 BUSINESS PARK DR, ARMONK, NY 10504 USA	WIN	28	ARMONK		J	M E SHARPE INC	2013		Liu, ZH (reprint author), Nankai Univ, Tianjin 300071, Peoples R China.	Asian Studies; Philosophy			1097-1467	CONTEMPORARY CHINESE THOUGHT
A00119		Liu Zehua		Liu, ZH			117								10.2753/CSP1097-1467450205	Article			127	;;;;				AF1WS			41673	CONTEMP CHIN THOUGHT	Contemp. Chin. Thought	English		4		80 BUSINESS PARK DR, ARMONK, NY 10504 USA	WIN	11	ARMONK		J	M E SHARPE INC	2013		Liu, ZH (reprint author), Nankai Univ, Tianjin 300071, Peoples R China.	Asian Studies; Philosophy			1097-1467	CONTEMPORARY CHINESE THOUGHT
A00120		Liu Zehua		Liu, ZH			128								10.2753/CSP1097-1467450206	Article			143	;;;;				AF1WS			41673	CONTEMP CHIN THOUGHT	Contemp. Chin. Thought	English		12		80 BUSINESS PARK DR, ARMONK, NY 10504 USA	WIN	16	ARMONK		J	M E SHARPE INC	2013		Liu, ZH (reprint author), Nankai Univ, Tianjin 300071, Peoples R China.	Asian Studies; Philosophy			1097-1467	CONTEMPORARY CHINESE THOUGHT
A00121	Findings from recent psycholinguistic studies of bilingual processing support the hypothesis that both languages of a bilingual are always active and that bilinguals continually engage in processes of language selection. This view aligns with the convergence hypothesis of bilingual language representation. Furthermore, it is hypothesized that when bilinguals perform a task in one language they ne…	;;Druks, Judit;;Weekes, Brendan Stuart		;;Druks, J;;Weekes, BS			578							Aphasia; Bilingual; Treatment; Inhibition; Asymmetry	10.1080/02643294.2013.878692	Article		weekes@hku.hk	596	;;;;				AE5YH		;;HIGHLY PROFICIENT BILINGUALS; SEMANTIC NAMING TREATMENT; LEXICAL ACCESS;;;INHIBITORY PROCESSES; TRILINGUAL APHASIA; SPEECH PRODUCTION;;;SPANISH-ENGLISH; THERAPY; SELECTION; STROKE	41828	COGN NEUROPSYCHOL	Cogn. Neuropsychol.	English		53		4 PARK SQUARE, MILTON PARK, ABINGDON OX14 4RN, OXFORDSHIRE, ENGLAND	41974	19	ABINGDON		J	ROUTLEDGE JOURNALS, TAYLOR & FRANCIS LTD	2013		Weekes, BS (reprint author), Univ Hong Kong, Commun Sci Lab, Hong Kong, Hong Kong, Peoples R China.	Psychology		SI	0264-3294	COGNITIVE NEUROPSYCHOLOGY
A00122	Conceptual primitivism is the view that truth is among our most basic and fundamental concepts. It cannot be defined, analyzed, or reduced into concepts that are more fundamental. Primitivism is opposed to both traditional attempts at defining truth (in terms of correspondence, coherence, or utility) and deflationary theories that argue that the notion of truth is exhausted by means of the truth …	Asay, Jamin		Asay, J			503								10.1111/1746-8361.12041	Article		jaminasay@ln.edu.hk	519	;;;;				AC8DC			4	DIALECTICA	Dialectica	English		33		111 RIVER ST, HOBOKEN 07030-5774, NJ USA	DEC	17	HOBOKEN		J	WILEY-BLACKWELL	2013		Asay, J (reprint author), Lingnan Univ, 8 Castle Peak Rd, Hong Kong, Hong Kong, Peoples R China.	Philosophy			0012-2017	DIALECTICA
A00123	This paper presents a quantitative model for assessing the spatiotemporal patterns in the growth of grain production in China between 1985 and 2008 using provincial panel data and a GIS model. The results show that the pathway for grain production relied mainly on land productivity growth as a rational response to the scarcity of cultivated land and a small peasant-based economy. Large-scale land…	;;Song, Xiaoqing;;Wu, Zhifeng		;;Song, XQ;;Wu, ZF			255							grain production; cultivated land; GIS; China	10.5367/oa.2013.0142	Article		sonniasxq@163.com	263	;;;;		;;National Key Technologies R&D Programme of the 12th Five-Year Plan of;;China [2012BAH32B03]; 'Yangcheng Scholars' Programme [12A002G]; National;;Science Foundation of China [41101078]	;;This work was supported by the National Key Technologies R&D Programme;;of the 12th Five-Year Plan of China (Grant No 2012BAH32B03), the;;'Yangcheng Scholars' Programme (Grant 12A002G) and the National Science;;Foundation of China (41101078).	AD9VK		AGRICULTURAL PRODUCTIVITY; REFORMS	4	OUTLOOK AGR	Outlook Agric.	English		23		258 BELSIZE RD, LONDON NW6 4BT, ENGLAND	DEC	9	LONDON		J	I P PUBLISHING LTD	2013		Song, XQ (reprint author), Guangzhou Univ, Sch Geog Sci, Guangzhou 510006, Guangdong, Peoples R China.	Agriculture			0030-7270	OUTLOOK ON AGRICULTURE
A00124	Arable land consolidation potential (ALCP) evaluation is an ex ante evaluation, the purpose of which is to select areas that are suitable for land consolidation projects and to support the decision-making processes of the LC Bureau. In this paper, ALCP is divided into two types - theoretical and practical. Theoretical ALCP represents the potential that can be fulfilled from a natural standpoint a…	;;Zhang, Zhengfeng;;Yan, Jinming;;Zhao, Wenwu;;Zhao, Wei		;;Zhang, ZF;;Yan, JM;;Zhao, WW;;Zhao, W			265							;;arable land consolidation; arable land consolidation potential;;;available land area; evaluation index; fuzzy synthetic evaluation model	10.5367/oa.2013.0147	Article		zhangzhengfeng@mparuc.edu.cn	272	;;;;		;;National Social Science Foundation of China [09ZD047]; project '985' in;;China; Fundamental Research Funds for the Central Universities; Renmin;;University of China	;;This work was supported by the Major Programme of the National Social;;Science Foundation of China (Grant No 09&ZD047), project '985' in China,;;the Fundamental Research Funds for the Central Universities, plus the;;Research Funds of Renmin University of China. We especially thank Dr;;Terry Bunn for checking our manuscript.	AD9VK		FRAGMENTATION; AREAS	4	OUTLOOK AGR	Outlook Agric.	English		18		258 BELSIZE RD, LONDON NW6 4BT, ENGLAND	DEC	8	LONDON		J	I P PUBLISHING LTD	2013		Zhang, ZF (reprint author), Renmin Univ China, Sch Publ Adm, Beijing 100872, Peoples R China.	Agriculture			0030-7270	OUTLOOK ON AGRICULTURE
A00125	This article evaluates the Heckman hypothesis on the health effects of noncognitive traits in China. The authors also use the robustness of health effects in different contexts to compare the degrees to which socioeconomic status (SES) and adolescent conscientiousness, a major dimension of noncognitive traits, are fundamental causes of health inequality. Drawing on the 2011 Chinese General Social…	;;Tam, Tony;;Wu, Hania Fei		;;Tam, T;;Wu, HF			32								10.2753/CSA2162-0555460202	Article		soc.tam@gmail.com; gintoolwhale@gmail.com	62	;;;;				AD4IM		;;SELF-RATED HEALTH; ADULT HEALTH; SOCIOECONOMIC-STATUS;;;PERSONALITY-TRAITS; SOCIAL CONDITIONS; TIME PREFERENCE; LIFE-COURSE;;;LONGEVITY; MORTALITY; EDUCATION	2	CHINESE SOCIOL REV	Chin. Sociol. Rev.	English		54		80 BUSINESS PARK DR, ARMONK, NY 10504 USA	WIN	31	ARMONK		J	M E SHARPE INC	2013		Tam, T (reprint author), Chinese Univ Hong Kong, Dept Sociol, Sino Bldg 4-F, Shatin, Hong Kong, Peoples R China.	Sociology			2162-0555	CHINESE SOCIOLOGICAL REVIEW
A00126	Drawing on survey data collected in 2011, this study investigates the radius of generalized trust in contemporary China. Based on the results of the ordinary least squares and finite mixture models, we find the average radius of generalized trust in the urban population is wider than that of the rural population. In addition, on average, married people show a narrower circle of generalized trust …	;;Zhou, Yi;;Hu, Anning		;;Zhou, Y;;Hu, AN			63								10.2753/CSA2162-0555460203	Article		huanning@fudan.edu.cn	90	;;;;				AD4IM		;;MARKET TRANSITION; STATE SOCIALISM; UNITED-STATES; DETERMINANTS;;;RELIGION; CONTEXT; MODELS; IMPACT	2	CHINESE SOCIOL REV	Chin. Sociol. Rev.	English		49		80 BUSINESS PARK DR, ARMONK, NY 10504 USA	WIN	28	ARMONK		J	M E SHARPE INC	2013		Hu, AN (reprint author), Fudan Univ, Dept Sociol, 1137 Liberal Arts Bldg,220 Handan Rd, Shanghai 200433, Peoples R China.	Sociology			2162-0555	CHINESE SOCIOLOGICAL REVIEW
A00127	Reputation systems have been recognized as successful online review communities and word-of-mouth channels. Our study draws upon the elaboration likelihood model to analyze the extent that the characteristics of reviewers and their early reviews reduce or worsen the bias of subsequent online reviews. Investigating the sources of this bias and ways to mitigate it is of considerable importance give…	;;Ma, Xiao (Sean);;Khansa, Lara;;Deng, Yun;;Kim, Sung S.		;;Ma, X;;Khansa, L;;Deng, Y;;Kim, SS			279							;;consumer review; elaboration likelihood model; hierarchical modeling;;;MCMC simulation; reputation systems; simultaneous equations model	10.2753/MIS0742-1222300310	Article			310	;;;;				AD1VQ		;;WORD-OF-MOUTH; ELABORATION LIKELIHOOD MODEL; ONLINE CONSUMER REVIEWS;;;PRODUCT REVIEWS; MODERATING ROLE; EMPIRICAL-ANALYSIS; SALES;;;INFORMATION; INTERNET; BEHAVIOR	3	J MANAGE INFORM SYST	J. Manage. Inform. Syst.	English		66		80 BUSINESS PARK DR, ARMONK, NY 10504 USA	WIN	32	ARMONK		J	M E SHARPE INC	2013		Ma, X (reprint author), Wisconsin Sch Business, Madison, WI USA.	;;Computer Science; Information Science & Library Science; Business &;;Economics			0742-1222	JOURNAL OF MANAGEMENT INFORMATION SYSTEMS
A00128	This work anchors on the theories of cognitive fit and schema congruity to advance a review-product congruity proposition. The proposition states that the effects of product review content (either attribute or experience based) on the product review comprehension (reflected by perceived cognitive effort and review comprehension time) and assessment (manifested by perceived review helpfulness) of …	;;Huang, Liqiang;;Tan, Chuan-Hoo;;Ke, Weiling;;Wei, Kwok-Kee		;;Huang, LQ;;Tan, CH;;Ke, WL;;Wei, KK			311							;;cognitive fit; product reviews; review assessment; review comprehension;;;schema congruity	10.2753/MIS0742-1222300311	Review			343	;;;;		;;Research Grants Council of the Hong Kong Special Administrative Region,;;China [CityU 151612]; City University of Hong Kong, China [CityU;;7002646]	;;The work described in this paper was fully supported by a grant from the;;Research Grants Council of the Hong Kong Special Administrative Region,;;China (Project no. CityU 151612) and the Strategic Research Grant Scheme;;sponsored by City University of Hong Kong, China (Project no. CityU;;7002646).	AD1VQ		;;ONLINE CONSUMER REVIEWS; EXPERIENCE GOODS; COGNITIVE FIT; INFORMATION;;;SEARCH; PERCEPTIONS; PERFORMANCE; STRATEGIES; KNOWLEDGE; TASK	3	J MANAGE INFORM SYST	J. Manage. Inform. Syst.	English		56		80 BUSINESS PARK DR, ARMONK, NY 10504 USA	WIN	33	ARMONK		J	M E SHARPE INC	2013	Tan, Chuan-Hoo/G-9681-2012	Huang, LQ (reprint author), Zhejiang Univ, Hangzhou, Zhejiang, Peoples R China.	;;Computer Science; Information Science & Library Science; Business &;;Economics			0742-1222	JOURNAL OF MANAGEMENT INFORMATION SYSTEMS
A00129	We experimentally investigate the impact of social comparison of ability on pro-social behaviour. Randomly-selected participants were required to perform a task to earn money. Subsequently, they had to decide how much of the money to transfer to a recipient. In our baseline treatment, allocators were not informed of their relative performance (ability) ranking on the task. In another treatment, a…	;;Riyanto, Yohanes E.;;Zhang, Jianlin		;;Riyanto, YE;;Zhang, JL			37							;;Social comparison; Relative ability; Pro-social behaviour; Real-effort;;allocation games	10.1016/j.socec.2013.08.001	Article		yeriyanto@ntu.edu.sg; zhangjianlin@sim.edu.sg	46	;;;;				AD2JO		;;FIELD EXPERIMENT; PUBLIC-GOODS; INEQUALITY; DICTATOR; COOPERATION;;;COMPETITION; ALTRUISM; CONSISTENCY; PREFERENCES; RECIPROCITY		J SOCIO-ECON	J. Socio-Econ.	English		41		360 PARK AVE SOUTH, NEW YORK, NY 10010-1710 USA	DEC	10	NEW YORK		J	ELSEVIER SCIENCE INC	2013		Riyanto, YE (reprint author), Nanyang Technol Univ, Div Econ, Sch Humanities & Social Sci, 14 Nanyang Dr HSS 04-83, Singapore 637332, Singapore.	Business & Economics			1053-5357	JOURNAL OF SOCIO-ECONOMICS
A00130	As the extent our impact on the environment becomes ever more clear, the search for ways to limit or even remedy some negative effects of our actions broadens. From science to religion, scholars in almost every field have been working hard to try to contribute to a healthier relationship between human beings and the natural world. In the humanities the issue is somewhat difficult. Because the top…	D'Ambrosio, Paul		D'Ambrosio, P			407									Article			417	;;;;				AC8VH			4	ENVIRON ETHICS	Environ. Ethics	English		21		;;UNIV NORTH TEXAS, DEPT PHILOSOPHY, PO BOX 13496, DENTON, TX 76203-3496;;USA	WIN	11	DENTON		J	ENVIRONMENTAL PHILOSOPHY INC	2013		D'Ambrosio, P (reprint author), E China Normal Univ, Shanghai 200062, Peoples R China.	Social Sciences - Other Topics; Environmental Sciences & Ecology			0163-4275	ENVIRONMENTAL ETHICS
A00131		Gao, Shan		Gao, S			505									Book Review		gsdream@163.com	507	;;;;				AC8VH			4	ENVIRON ETHICS	Environ. Ethics	English		1		;;UNIV NORTH TEXAS, DEPT PHILOSOPHY, PO BOX 13496, DENTON, TX 76203-3496;;USA	WIN	3	DENTON		J	ENVIRONMENTAL PHILOSOPHY INC	2013		Gao, S (reprint author), Soochow Univ, Coll Polit & Publ Management, Dept Philosophy, Suzhou, Jiangsu, Peoples R China.	Social Sciences - Other Topics; Environmental Sciences & Ecology			0163-4275	ENVIRONMENTAL ETHICS
A00132		Gao, Shan		Gao, S			505									Book Review		gsdream@163.com	507	;;;;				AC8VH			4	ENVIRON ETHICS	Environ. Ethics	English		1		;;UNIV NORTH TEXAS, DEPT PHILOSOPHY, PO BOX 13496, DENTON, TX 76203-3496;;USA	WIN	3	DENTON		J	ENVIRONMENTAL PHILOSOPHY INC	2013		Gao, S (reprint author), Soochow Univ, Coll Polit & Publ Management, Dept Philosophy, Suzhou, Jiangsu, Peoples R China.	Social Sciences - Other Topics; Environmental Sciences & Ecology			0163-4275	ENVIRONMENTAL ETHICS
A00133	Insurance may encourage coexistence between farmers and wildlife by reimbursing farmers' losses. China introduced an insurance scheme to mitigate human-elephant conflict in Xishuangbanna Dai autonomous prefecture in Yunnan Province, where elephants cause damage to rubber plantations. However, recent experience has suggested that the present insurance system exhibits poor performance related to fu…	;;Chen, Shu;;Yi, Zhuang-Fang;;Campos-Arceiz, Ahimsa;;Chen, Ming-Yong;;Webb, Edward L.		;;Chen, S;;Yi, ZF;;Campos-Arceiz, A;;Chen, MY;;Webb, EL			31							;;Asian elephant; China; Compensation; Hevea brasiliensis; Risk; Rubber;;;Xishuangbanna	10.1016/j.biocon.2013.09.017	Article		beckyshuchen@gmail.com; ted.webb@nus.edu.sg	39	;;;;				AB8PD		;;HUMAN-ELEPHANT CONFLICT; COMPENSATION SCHEMES; SNOW LEOPARD;;;CONSERVATION; DEPREDATION; LIVESTOCK; RUBBER; CHINA; CHALLENGES;;;CARNIVORES		BIOL CONSERV	Biol. Conserv.	English		49	Webb, Edward/0000-0001-5554-9955	THE BOULEVARD, LANGFORD LANE, KIDLINGTON, OXFORD OX5 1GB, OXON, ENGLAND	DEC	9	OXFORD		J	ELSEVIER SCI LTD	2013	Webb, Edward/E-8343-2011	Chen, S (reprint author), Natl Univ Singapore, Dept Biol Sci, 14 Sci Dr 4, Singapore 117543, Singapore.	Biodiversity & Conservation; Environmental Sciences & Ecology			0006-3207	BIOLOGICAL CONSERVATION
A00134	;;Background: There is growing evidence that men who have sex with men (MSM) are currently a group at high risk of HIV infection in China. Our study aims to know the factors affecting consistent condom use among MSM recruited through the internet in Huzhou city.;;Methods: An anonymous cross-sectional study was conducted by recruiting 410 MSM living in Huzhou city via the Internet. The socio-demog…	;;Jin, Meihua;;Yang, Zhongrong;;Dong, Zhengquan;;Han, Jiankang	1101	;;Jin, MH;;Yang, ZR;;Dong, ZQ;;Han, JK										HIV; AIDS; Men who have sex with men (MSM)	10.1186/1471-2458-13-1101	Article		yzhr91@126.com		;;;;				AC1RL		;;SEXUALLY-TRANSMITTED INFECTIONS; RISK BEHAVIORS; ANAL INTERCOURSE; MALE;;CLIENTS; PEER NORMS; HIV; MSM; CHINA; INTERVENTION; KNOWLEDGE		BMC PUBLIC HEALTH	BMC Public Health	English		37		236 GRAYS INN RD, FLOOR 6, LONDON WC1X 8HL, ENGLAND	41974	7	LONDON		J	BIOMED CENTRAL LTD	2013		Yang, ZR (reprint author), Huzhou Ctr Dis Control & Prevent, Huzhou 313000, Zhejiang, Peoples R China.	Public, Environmental & Occupational Health			1471-2458	BMC PUBLIC HEALTH
A00135	In his article "The Persistence of 'Cathay' in World Literature" Eugene Eoyang argues that China has only recently begun to occupy a place in world literatures as evidenced by the absence of Chinese literature from the early editions of the widely adopted Norton Anthology of World Masterpieces and its token representations in subsequent editions. "Orientalized" images of China still persist partl…	Eoyang, Eugene		Eoyang, E											10.7771/1481-4374.2349	Article		eoyang@ln.edu.hk		;;;;				AA9XM			5	CLCWEB-COMP LIT CULT	CLCWEB-Comp. Lit. Cult.	English		40		1207 SOUTH CAMPUS COURTS-E, W LAFAYETTE, IN 47907-1207 USA	DEC	10	W LAFAYETTE		J	PURDUE UNIV PRESS	2013		Eoyang, E (reprint author), Indiana Univ Bloomington, Bloomington, IN 47405 USA.	Literature		SI	1481-4374	CLCWEB-COMPARATIVE LITERATURE AND CULTURE
A00136	In his article "On World Literatures, Comparative Literature, and (Comparative) Cultural Studies" Ning Wang argues that cultural studies is characterized by being opposed to (elite) literary studies not only because it points to popular or non-elite literature, but also because it challenges the discipline of comparative literature. On the other hand, (comparative) cultural studies complements li…	Wang, Ning	4	Wang, N											10.7771/1481-4374.2336	Article		wangning@tsinghua.edu.cn		;;;;				AA9XM			5	CLCWEB-COMP LIT CULT	CLCWEB-Comp. Lit. Cult.	English		31		1207 SOUTH CAMPUS COURTS-E, W LAFAYETTE, IN 47907-1207 USA	DEC	9	W LAFAYETTE		J	PURDUE UNIV PRESS	2013		Wang, N (reprint author), Shanghai Jiao Tong Univ, Shanghai 200030, Peoples R China.	Literature		SI	1481-4374	CLCWEB-COMPARATIVE LITERATURE AND CULTURE
A00137	Using a clock model of a multi-unit, oral, ascending-price auction, within the common-value paradigm, we analyze the behavior of the transaction price as the numbers of bidders and units gets large in a particular way. We find that even though the transaction price is determined by a fraction of losing drop-out bids, that price converges in probability to the true, but ex ante unknown, value. Sub…	;;Hong, Han;;Paarsch, Harry J.;;Xu, Pai		;;Hong, H;;Paarsch, HJ;;Xu, P			664								10.1111/1756-2171.12034	Article		doubleh@Stanford.edu; HJPaarsch@Gmail.com; PaiXu@HKU.hk	685	;;;;				AB2DE		INFORMATION AGGREGATION	4	RAND J ECON	Rand J. Econ.	English		20		111 RIVER ST, HOBOKEN 07030-5774, NJ USA	WIN	22	HOBOKEN		J	WILEY-BLACKWELL	2013		Hong, H (reprint author), Stanford Univ, Stanford, CA 94305 USA.	Business & Economics			0741-6261	RAND JOURNAL OF ECONOMICS
A00138	In their article "A Survey of Twentieth-century Literary Theory and Criticism in Chinese" Xiaoming Chen and Anfeng Sheng survey Chinese-language scholarship that for the reason of the East-West divide is less known in the West. Although heavily influenced by both Western and Soviet Marxist thought, twentieth-century Chinese literary theorization and criticism produced much incisive scholarship ba…	;;Chen, Xiaoming;;Sheng, Anfeng	14	;;Chen, XM;;Sheng, AF											10.7771/1481-4374.2367	Article		cxm59@vip.sina.com; sheng_anfeng@163.com		;;;;				AA9YB			6	CLCWEB-COMP LIT CULT	CLCWEB-Comp. Lit. Cult.	English		64		1207 SOUTH CAMPUS COURTS-E, W LAFAYETTE, IN 47907-1207 USA	DEC	10	W LAFAYETTE		J	PURDUE UNIV PRESS	2013		Chen, XM (reprint author), Peking Univ, Beijing, Peoples R China.	Literature		SI	1481-4374	CLCWEB-COMPARATIVE LITERATURE AND CULTURE
A00139	In their article "Translation, Cross-cultural interpretation, and World Literatures" Qingben Li and Jinghua Guo discuss how to make what is national literature become part of world literatures and posit that there are at least two ways by this can be done: translation and cross-cultural interpretation. Translation covers not only the conversion of language, but also the selection and variation of…	;;Li, Qingben;;Guo, Jinghua	5	;;Li, QB;;Guo, JH											10.7771/1481-4374.2358	Article		liqingben1@sina.com; lindagjh@126.com		;;;;				AA9YB			6	CLCWEB-COMP LIT CULT	CLCWEB-Comp. Lit. Cult.	English		47		1207 SOUTH CAMPUS COURTS-E, W LAFAYETTE, IN 47907-1207 USA	DEC	9	W LAFAYETTE		J	PURDUE UNIV PRESS	2013		Li, QB (reprint author), Beijing Language & Culture Univ, Beijing, Peoples R China.	Literature		SI	1481-4374	CLCWEB-COMPARATIVE LITERATURE AND CULTURE
A00140	In his article "Interdisciplinary Studies and Comparative Literature in China and the West" Aaron Lee Moore addresses the arguments on the part of Chinese and Western scholars against and for the full inclusion of interdisciplinary studies within the discipline of comparative literature. Interdisciplinary studies, in general, have been resisted in Chinese scholarship as it once was in the U.S. an…	Moore, Aaron Lee	6	Moore, AL											10.7771/1481-4374.2359	Article		floydshine@gmail.com		;;;;				AA9YB			6	CLCWEB-COMP LIT CULT	CLCWEB-Comp. Lit. Cult.	English		49		1207 SOUTH CAMPUS COURTS-E, W LAFAYETTE, IN 47907-1207 USA	DEC	11	W LAFAYETTE		J	PURDUE UNIV PRESS	2013		Moore, AL (reprint author), Sichuan Univ, Chengdu, Peoples R China.	Literature		SI	1481-4374	CLCWEB-COMPARATIVE LITERATURE AND CULTURE
A00141		Shang, Biwu	19	Shang, BW											10.7771/1481-4374.2372	Book Review		biwushang@gmail.com		;;;;				AA9YB			6	CLCWEB-COMP LIT CULT	CLCWEB-Comp. Lit. Cult.	English		39		1207 SOUTH CAMPUS COURTS-E, W LAFAYETTE, IN 47907-1207 USA	DEC	7	W LAFAYETTE		J	PURDUE UNIV PRESS	2013		Shang, BW (reprint author), Shanghai Jiao Tong Univ, Shanghai 200030, Peoples R China.	Literature		SI	1481-4374	CLCWEB-COMPARATIVE LITERATURE AND CULTURE
A00142		Wang, Miaomiao	17	Wang, MM											10.7771/1481-4374.2370	Book Review		pauline@ncepu.edu.cn		;;;;				AA9YB			6	CLCWEB-COMP LIT CULT	CLCWEB-Comp. Lit. Cult.	English		59		1207 SOUTH CAMPUS COURTS-E, W LAFAYETTE, IN 47907-1207 USA	DEC	10	W LAFAYETTE		J	PURDUE UNIV PRESS	2013		Wang, MM (reprint author), North China Elect Power Univ, Beijing, Peoples R China.	Literature		SI	1481-4374	CLCWEB-COMPARATIVE LITERATURE AND CULTURE
A00143		Wang, Ning	18	Wang, N											10.7771/1481-4374.2371	Book Review		wangning@tsinghua.edu.cn		;;;;				AA9YB			6	CLCWEB-COMP LIT CULT	CLCWEB-Comp. Lit. Cult.	English		39		1207 SOUTH CAMPUS COURTS-E, W LAFAYETTE, IN 47907-1207 USA	DEC	7	W LAFAYETTE		J	PURDUE UNIV PRESS	2013		Wang, N (reprint author), Shanghai Jiao Tong Univ, Shanghai 200030, Peoples R China.	Literature		SI	1481-4374	CLCWEB-COMPARATIVE LITERATURE AND CULTURE
A00144		Zhang, Tian	20	Zhang, T											10.7771/1481-4374.2373	Book Review		zhangtian@mail.ccnu.edu.cn		;;;;				AA9YB			6	CLCWEB-COMP LIT CULT	CLCWEB-Comp. Lit. Cult.	English		35		1207 SOUTH CAMPUS COURTS-E, W LAFAYETTE, IN 47907-1207 USA	DEC	7	W LAFAYETTE		J	PURDUE UNIV PRESS	2013		Zhang, T (reprint author), Cent China Normal Univ, Wuhan, Peoples R China.	Literature		SI	1481-4374	CLCWEB-COMPARATIVE LITERATURE AND CULTURE
A00145	;;Aim: The aim of this study was to analyze the barriers in the implementation of the Framework Convention on Tobacco Control (FCTC) in China and present recommendations on ways to address these challenges in tobacco control in China.;;Methods: We review the available literature on progress and explore the barriers and challenges that impede a speedier pace in the adoption of the effective tobacc…	;;Hu, Teh-Wei;;Lee, Anita H.;;Mao, Zhengzhong		;;Hu, TW;;Lee, AH;;Mao, ZZ			13							tobacco; policy; advocacy; privatization	10.1177/1757975913501910	Article		alee@phi.org	22	;;;;				AA6GV		CIGARETTE-SMOKING; IMPLEMENTATION; POVERTY	4	GLOB HEALTH PROMOT	Glob. Health Promot.	English		39		2455 TELLER RD, THOUSAND OAKS, CA 91320 USA	DEC	10	THOUSAND OAKS		J	SAGE PUBLICATIONS INC	2013		Lee, AH (reprint author), Inst Publ Hlth, Ctr Int Tobacco Control, 555 12th St 10-F, Oakland, CA 94607 USA.	Public, Environmental & Occupational Health			1757-9759	GLOBAL HEALTH PROMOTION
A00146	Road traffic crashes in China kill in excess of 250,000 people annually, more than any other country in the world. They are the fourth leading cause of premature death in the country and are responsible for 2.4% of the burden of non-fatal health loss in the country. Interventions to curb speeding and drink driving are being implemented in the cities of Suzhou and Dalian since late 2010. We evalua…	;;Bhalla, Kavi;;Li, Qingfeng;;Duan, Leilen;;Wang, Yuan;;Bishai, David;;Hyder, Adnan A.		;;Bhalla, K;;Li, QF;;Duan, LL;;Wang, Y;;Bishai, D;;Hyder, AA			S49							Road traffic injury; China; Speeding; Drink driving; Safety		Article		kbhalla@jhsph.edu	S56	;;;;		;;World Health Organization; Global Road Safety Partnership; Bloomberg;;Philanthropies	;;We are grateful to researchers from the Suzhou Center for Disease;;Control and Prevention and the Dalian Center for Disease Control and;;Prevention who implemented the primary data collection activities. We;;are also grateful to World Health Organization, and the Global Road;;Safety Partnership for their support, cooperation and guidance. This;;work was conducted as part of the Global Road Safe…	AA9II		SYSTEMATIC ANALYSIS; GLOBAL BURDEN; DISEASE; ENFORCEMENT; INJURIES		INJURY	Injury-Int. J. Care Inj.	English		23		THE BOULEVARD, LANGFORD LANE, KIDLINGTON, OXFORD OX5 1GB, OXON, ENGLAND	DEC	8	OXFORD		J	ELSEVIER SCI LTD	2013		Bhalla, K (reprint author), Johns Hopkins Bloomberg Sch Publ Hlth, Johns Hopkins Int Injury Res Unit, 615 N Wolfe St,E8642, Baltimore, MD 21205 USA.	General & Internal Medicine; Emergency Medicine; Orthopedics; Surgery			0020-1383	INJURY-INTERNATIONAL JOURNAL OF THE CARE OF THE INJURED
A00147	Based on the reliability budget and percentile travel time (PTT) concept, a new travel time index named combined mean travel time (CMTT) under stochastic traffic network was proposed. CMTT here was defined as the convex combination of the conditional expectations of PTT-below and PTT-excess travel times. The former was designed as a risk-optimistic travel time index, and the latter was a risk-pes…	;;Zhang Wen-yi;;Guan Wei;;Song Li-ying;;Sun Hui-jun		;;Zhang, WY;;Guan, W;;Song, LY;;Sun, HJ			3770							;;travel behavior; risk attitude; travel time reliability; combined mean;;travel time; wardropian user equilibrium	10.1007/s11771-013-1906-z	Article		weig@bjtu.edu.cn	3778	;;;;		;;National Basic Research Program of China [2012CB725403-5]; National;;Natural Science Foundation of China [71131001-2]; Fundamental Research;;Funds for the Central Universities, China [2012JBZ005]; Foundation for;;National Excellent Doctoral Dissertation of China [201170]	;;Foundation item: Project(2012CB725403-5) supported by National Basic;;Research Program of China; Project(71131001-2) supported by National;;Natural Science Foundation of China; Projects(2012JBZ005) supported by;;Fundamental Research Funds for the Central Universities, China;;;Project(201170) supported by the Foundation for National Excellent;;Doctoral Dissertation of China	AB7HR		NETWORK; RISK; PATH; PROBABILITY; UNCERTAINTY; DEMAND	12	J CENT SOUTH UNIV	J. Cent. South Univ.	English		31		EDITORIAL OFFICE, CHANGSHA, HUNAN 410083, PEOPLES R CHINA	DEC	9	HUNAN		J	JOURNAL OF CENTRAL SOUTH UNIV TECHNOLOGY	2013		Guan, W (reprint author), Beijing Jiaotong Univ, Key Lab Urban Transportat Complex Syst Theory & T, Minist Educ, Beijing 100044, Peoples R China.	Metallurgy & Metallurgical Engineering			2095-2899	JOURNAL OF CENTRAL SOUTH UNIVERSITY
A00148	Assessments of the complexity of lithic technologies coming from different time periods, regions, or hominid species are recurrent features of the literature on Paleolithic archaeology. Yet the notion of lithic complexity is often defined intuitively and qualitatively, which can easily lead to circular arguments and makes difficult the comparison of assemblages across different regions and time p…	;;Perreault, Charles;;Brantingham, P. Jeffrey;;Kuhn, Steven L.;;Wurz, Sarah;;Gao, Xing		;;Perreault, C;;Brantingham, PJ;;Kuhn, SL;;Wurz, S;;Gao, X			S397								10.1086/673264	Article		;;perreaulc@missouri.edu; branting@ucla.edu; skuhn@email.arizona.edu;;;sarah.wurz@wits.ac.za; gaoxing@ivpp.ac.cn	S406	;;;;				AA0MY		;;MIDDLE STONE-AGE; MODERN HUMAN-BEHAVIOR; SAMPLE-SIZE; HUMAN-EVOLUTION;;;SOUTH-AFRICA; TOOL; CULTURE; VARIABILITY; PLEISTOCENE; DEMOGRAPHY		CURR ANTHROPOL	Curr. Anthropol.	English		76		1427 E 60TH ST, CHICAGO, IL 60637-2954 USA	41974	10	CHICAGO		J	UNIV CHICAGO PRESS	2013		Perreault, C (reprint author), Univ Missouri, Dept Anthropol, 107 Swallow Hall, Columbia, MO 65211 USA.	Anthropology			0011-3204	CURRENT ANTHROPOLOGY
A00149		Chan, Peter C. H.		Chan, PCH			613								10.1017/S1566752912001322	Book Review			618	;;;;				AB4NV			4	EUR BUS ORGAN LAW RE	Eur. Bus. Organ. Law Rev.	English		7		EDINBURGH BLDG, SHAFTESBURY RD, CB2 8RU CAMBRIDGE, ENGLAND	DEC	6	CAMBRIDGE		J	CAMBRIDGE UNIV PRESS	2013		Chan, PCH (reprint author), City Univ Hong Kong, Sch Law, Hong Kong, Hong Kong, Peoples R China.	Business & Economics; Government & Law			1566-7529	EUROPEAN BUSINESS ORGANIZATION LAW REVIEW
A00150	The current research explores how the structure of a goal, more specifically whether its completion requires completing a set of actions in a fixed sequence or in a flexible order, influences consumers' decision to adopt the goal and how individuals actually fare once they have initiated the goal pursuit. Four experiments demonstrated that although the requirement to complete all goal-related act…	;;Jin, Liyin;;Huang, Szu-Chi;;Zhang, Ying		;;Jin, LY;;Huang, SC;;Zhang, Y			711								10.1086/671762	Article		;;jinliyin@fudan.edu.cn; huangsc@stanford.edu;;;Ying.Zhang@mccombs.utexas.edu	725	;;;;				AB3QD		;;SELF-CONTROL; IMPLEMENTATION INTENTIONS; CHOICE; CONSUMPTION;;;DETERMINANT; PROGRAMS; BEHAVIOR; PROGRESS; STATES	4	J CONSUM RES	J. Consum. Res.	English		35		1427 E 60TH ST, CHICAGO, IL 60637-2954 USA	DEC	15	CHICAGO		J	UNIV CHICAGO PRESS	2013		Jin, LY (reprint author), Fudan Univ, Sch Management, 670 Guoshun Rd, Shanghai 200433, Peoples R China.	Business & Economics			0093-5301	JOURNAL OF CONSUMER RESEARCH
A00151	This research investigates how observers react when they see someone else being given a compliment that is flattering but that appears sincere. Prior work suggests that to the extent the compliment is perceived to be genuine, observers will not judge the source negatively. Merging insights from social comparison research and dual attitudes theory, this article presents a novel conceptualization o…	;;Chan, Elaine;;Sengupta, Jaideep		;;Chan, E;;Sengupta, J			740								10.1086/672357	Article		y.l.chan@uvt.nl; mkjaisen@ust.hk	758	;;;;				AB3QD		;;EXPLICIT ATTITUDE-CHANGE; DUAL ATTITUDES; ENVY; IMPLICIT; PERSUASION;;;IMPACT; MODEL; CONSEQUENCES; INGRATIATION; INFORMATION	4	J CONSUM RES	J. Consum. Res.	English		44		1427 E 60TH ST, CHICAGO, IL 60637-2954 USA	DEC	19	CHICAGO		J	UNIV CHICAGO PRESS	2013		Chan, E (reprint author), Tilburg Univ, Tilburg Sch Econ & Management, Warandelaan 2,POB 90153, NL-5000 LE Tilburg, Netherlands.	Business & Economics			0093-5301	JOURNAL OF CONSUMER RESEARCH
A00152	This paper proposes an approach to deal with the hub location problem in urban public transit network design, which includes two phases: to determine the candidate nodes and to optimize the distribution of transit hubs. Firstly, an indicator defined as passenger attraction is introduced to describe the attraction level of a transit node to passengers. A selection model based on passenger attracti…	;;Yu, Bin;;Zhu, Hanbing;;Cai, Wanjun;;Ma, Ning;;Kuang, Qiji;;Yao, Baozhen		;;Yu, B;;Zhu, HB;;Cai, WJ;;Ma, N;;Kuang, QJ;;Yao, BZ			62							;;Transit hubs; Passenger attraction; Candidate nodes; Location;;optimization	10.1016/j.jtrangeo.2013.09.008	Article		Yaobaozhen@hotmail.com	71	;;;;				AA0WB		FACILITIES; NETWORK; ALGORITHM		J TRANSP GEOGR	J. Transp. Geogr.	English		27	YU, Bin/0000-0002-8332-1939;	THE BOULEVARD, LANGFORD LANE, KIDLINGTON, OXFORD OX5 1GB, OXON, ENGLAND	DEC	10	OXFORD		J	ELSEVIER SCI LTD	2013	YU, Bin/C-2361-2010; yao, Baozhen/I-9650-2014	Yao, BZ (reprint author), Dalian Univ Technol, Sch Automot Engn, Dalian 116024, Peoples R China.	Business & Economics; Geography; Transportation			0966-6923	JOURNAL OF TRANSPORT GEOGRAPHY
A00153	Previous studies have focused on entire trips within a geographical region, while only a few have examined trips to and from a city landmark. This paper examines trips and their CO2 emissions to and from a shopping center from a time-space perspective, and it further considers how this information can be used in relocation planning. It is a case study in the Borlange city in mid-Sweden where trip…	;;Jia, Tao;;Carling, Kenneth;;Hakansson, Johan		;;Jia, T;;Carling, K;;Hakansson, J			135							GPS tracking data; Trips; CO2 emissions; Relocation planning	10.1016/j.jtrangeo.2013.09.018	Article		jiatao83@hotmail.com; kca@du.se; jhk@du.se	145	;;;;				AA0WB		LOCATION MODELS; SCALING LAWS; NETWORK; TRAVEL; US		J TRANSP GEOGR	J. Transp. Geogr.	English		32		THE BOULEVARD, LANGFORD LANE, KIDLINGTON, OXFORD OX5 1GB, OXON, ENGLAND	DEC	11	OXFORD		J	ELSEVIER SCI LTD	2013		Jia, T (reprint author), Wuhan Univ, Sch Remote Sensing & Informat Engn, Wuhan, Peoples R China.	Business & Economics; Geography; Transportation			0966-6923	JOURNAL OF TRANSPORT GEOGRAPHY
A00154	Existing research rarely systematically reviews how China has funded or will fund expanding transit systems. We argue that fiscal regulations have shaped how China's municipal governments plan for and invest in passenger rail services and land development around stations, and that policy reforms are necessary to bring successful transit-oriented development and transit operation for China's next …	;;Li, Guicai;;Luan, Xiaofan;;Yang, Jiawen;;Lin, Xiongbin		;;Li, GC;;Luan, XF;;Yang, JW;;Lin, XB			268							;;Inter-city railway; Transit-oriented development; Value capture; Spatial;;planning; Pearl River Delta; China	10.1016/j.jtrangeo.2013.08.015	Article		yangjw@pkusz.edu.cn	277	;;;;				AA0WB		LAND		J TRANSP GEOGR	J. Transp. Geogr.	English		41		THE BOULEVARD, LANGFORD LANE, KIDLINGTON, OXFORD OX5 1GB, OXON, ENGLAND	DEC	10	OXFORD		J	ELSEVIER SCI LTD	2013		Yang, JW (reprint author), Peking Univ, Shenzhen Grad Sch, Sch Urban Planning & Design, Shenzhen 518055, Peoples R China.	Business & Economics; Geography; Transportation			0966-6923	JOURNAL OF TRANSPORT GEOGRAPHY
A00155	The shipment of hazardous materials (hazmats) received considerable attention as the consequences of the incidents, including environmental pollution, economic damage, injuries, and fatalities are extremely undesirable. Previous research mainly focused on the shipment of hazmats under known link incident probabilities. Using the Nash game theory approach, this paper studies the integrated routing…	Szeto, W. Y.		Szeto, WY			237							;;routing and scheduling; hazardous materials; Nash game; linear;;programming; maxmin problems	10.1080/21680566.2013.861330	Article		ceszeto@hku.hk	260	;;;;		;;University Research Committee [201111159056, 201211159009]; Faculty of;;Engineering Top-up Grant of the University of Hong Kong; National;;Natural Science Foundation of China [71271183]	;;The research was jointly supported by grants [201111159056 and;;201211159009] from the University Research Committee and Faculty of;;Engineering Top-up Grant of the University of Hong Kong, and a grant;;from National Natural Science Foundation of China [71271183].	272RQ		;;TRANSPORT NETWORK DESIGN; TRAFFIC ASSIGNMENT; PERFORMANCE RELIABILITY;;;RISK; TIME; STRATEGIES; INTERDICTION; MODELS; VULNERABILITY; UNCERTAINTY	3	TRANSPORTMETRICA B	Transportmetrica B-Transp. Dyn.	English		54	Szeto, Wai Yuen/0000-0001-7059-3532	520 CHESTNUT STREET, STE 850, PHILADELPHIA, PA 19106 USA	41974	24	PHILADELPHIA		J	TAYLOR & FRANCIS INC	2013	Yang, Hai/F-8848-2011; Szeto, Wai Yuen/E-9886-2010	Szeto, WY (reprint author), Univ Hong Kong, Dept Civil Engn, Hong Kong, Hong Kong, Peoples R China.	Transportation		SI	2168-0566	TRANSPORTMETRICA B-TRANSPORT DYNAMICS
A00156	China's forest bioenergy policies are evolving against the backdrop of pressing national energy challenges similar to those faced by OECD countries, and chronic rural energy challenges more characteristic of developing countries. Modern forest bioenergy could contribute to solutions to both of these challenges. However, because of limitations in current technologies and institutions, significant …	;;Kahrl, Fredrich;;Su, Yufang;;Tennigkeit, Timm;;Yang, Yongping;;Xu, Jianchu		;;Kahrl, F;;Su, YF;;Tennigkeit, T;;Yang, YP;;Xu, JC			84							Bioenergy; Biofuels; China; Forest policy; Rural energy	10.1016/j.biombioe.2012.01.042	Article		fkahrl@berkeley.edu; jxu@mail.kib.ac.cn	91	;;;;		;;Re-Impact project [ENV/2007/114431]; European Union Aid Cooperation;;Office Program on Environment in Developing Countries and Tropical;;Forests and other Forests in Developing Countries; CGIAR	;;This research was conducted with support from the Re-Impact project;;ENV/2007/114431, funded by the European Union Aid Cooperation Office;;Program on Environment in Developing Countries and Tropical Forests and;;other Forests in Developing Countries. This research was also supported;;by the CGIAR Research Program 6: Forests, Landscapes and Governance, and;;Research Program 7: Climate Change, Ag…	AA2FL		RURAL ENERGY; AIR-POLLUTION		BIOMASS BIOENERG	Biomass Bioenerg.	English		37		THE BOULEVARD, LANGFORD LANE, KIDLINGTON, OXFORD OX5 1GB, ENGLAND	DEC	8	OXFORD		J	PERGAMON-ELSEVIER SCIENCE LTD	2013		Kahrl, F (reprint author), Chinese Acad Sci, Kunming Inst Bot, Key Lab Biodivers & Biogeog, Kunming 650201, Peoples R China.				0961-9534	BIOMASS & BIOENERGY
A00157	Water security is a key policy area for the Anthropocene; here we consider recent discourses of adaptive management in relation to water security. Definitions of water security emphasise the dual productive/destructive potentials of water, indicating its inherent economic, social and environmental complexity. Adaptive management has potential to address this social-ecological complexity because i…	;;Allan, Catherine;;Xia, Jun;;Pahl-Wostl, Claudia		;;Allan, C;;Xia, J;;Pahl-Wostl, C			625								10.1016/j.cosust.2013.09.004	Review		callan@csu.edu.au	632	;;;;				AA5ON		;;MURRAY-DARLING BASIN; RESOURCES MANAGEMENT; RIVER-BASINS; FLOOD RISK;;;GOVERNANCE; POLICY; CHINA; AUSTRALIA; PRESSURE; WORLD	6	CURR OPIN ENV SUST	Curr. Opin. Environ. Sustain.	English		65		THE BOULEVARD, LANGFORD LANE, KIDLINGTON, OXFORD OX5 1GB, OXON, ENGLAND	DEC	8	OXFORD		J	ELSEVIER SCI LTD	2013		Allan, C (reprint author), Charles Sturt Univ, Inst Land Water & Soc, Albury, NSW, Australia.				1877-3435	CURRENT OPINION IN ENVIRONMENTAL SUSTAINABILITY
A00158	TBCA has emerged to solve the limitations of administering cognitive assessments face-to-face. The recent development of telephones and knowledge advances in the area of cognitive impairment may affect the development of TBCA. The purpose of this paper is to discuss how smartphones can be used to enhance the applicability of TBCA, which has previously been administered by conventional telephone. …	;;Kwan, Rick Yiu-Cho;;Lai, Claudia Kam-Yuk		;;Kwan, RYC;;Lai, CKY			7110							telephone; cognitive assessment; smartphone; dementia	10.3390/ijerph10127110	Article		rick.kwan@polyu.edu.hk; claudia.lai@polyu.edu.hk	7125	;;;;				296XV		;;ALZHEIMERS ASSOCIATION WORKGROUPS; MINI-MENTAL-STATE; DIAGNOSTIC;;GUIDELINES; NATIONAL INSTITUTE; ASSESSMENT BATTERY; IMPAIRMENT;;;DEMENTIA; VALIDATION; DISEASE; TECHNOLOGY	12	INT J ENV RES PUB HE	Int. J. Environ. Res. Public Health	English		61		POSTFACH, CH-4005 BASEL, SWITZERLAND	DEC	16	BASEL		J	MDPI AG	2013		Lai, CKY (reprint author), Hong Kong Polytech Univ, Sch Nursing, Kowloon, Hong Kong, Peoples R China.				1660-4601	INTERNATIONAL JOURNAL OF ENVIRONMENTAL RESEARCH AND PUBLIC HEALTH
A00159		Puig, Gonzalo Villalta		Puig, GV			1059									Book Review		g.villalta.puig@cuhk.edu.hk	1061	;;;;				300QQ			4	LEIDEN J INT LAW	Leiden J. Int. Law	English		1		EDINBURGH BLDG, SHAFTESBURY RD, CB2 8RU CAMBRIDGE, ENGLAND	DEC	5	CAMBRIDGE		J	CAMBRIDGE UNIV PRESS	2013		Puig, GV (reprint author), Chinese Univ Hong Kong, Fac Law, Hong Kong, Hong Kong, Peoples R China.				0922-1565	LEIDEN JOURNAL OF INTERNATIONAL LAW
A00160	;;BACKGROUND: In 2010, there were an estimated 15 million preterm births worldwide (<37 wk gestation). Survivors are at risk of adverse outcomes, and burden estimation at global and regional levels is critical for priority setting.;;METHODS: Systematic reviews and meta-analyses were undertaken to estimate the risk of long-term neurodevelopmental impairment for surviving preterm babies according t…	;;Blencowe, Hannah;;Lee, Anne C. C.;;Cousens, Simon;;Bahalim, Adil;;Narwal, Rajesh;;Zhong, Nanbert;;Chous, Doris;;Say, Lale;;Modi, Neena;;Katz, Joanne;;Vos, Theo;;Marlow, Neil;;Lawn, Joy E.		;;Blencowe, H;;Lee, ACC;;Cousens, S;;Bahalim, A;;Narwal, R;;Zhong, N;;Chous, D;;Say, L;;Modi, N;;Katz, J;;Vos, T;;Marlow, N;;Lawn, JE			17								10.1038/pr.2013.204	Article		Hannah.Blencowe@lshtm.ac.uk	34	;;;;		;;Bill and Melinda Gates Foundation through US Fund for UNICEF; Bill and;;Melinda Gates Foundation through the Child Health Epidemiology Reference;;Group; Bill and Melinda Gates Foundation through Save the Children's;;Saving Newborn Lives program; Bill and Melinda Gates Foundation;;;Department of Reproductive Health and Research, WHO, through the Special;;Program of Research, Development, and Res…	;;This article is published as part of a supplement sponsored by The Bill;;and Melinda Gates Foundation to the Child Health Epidemiology Reference;;Group (CHERG) through US Fund for UNICEF and to Save the Children's;;Saving Newborn LiVes program. H.B., A.C.L. and S.C. were funded through;;a grant from the Bill and Melinda Gates Foundation through the Child;;Health Epidemiology Reference Group. J.…	AA5RN		;;MIDDLE-INCOME COUNTRIES; FOR-GESTATIONAL-AGE; WEIGHT CHILDREN;;;FOLLOW-UP; SYSTEMATIC ANALYSIS; PSYCHIATRIC-DISORDERS; DEVELOPMENTAL;;DELAY; NEONATAL SURVIVAL; BEHAVIOR PROBLEMS; HEALTH OUTCOMES		PEDIATR RES	Pediatr. Res.	English		101		75 VARICK ST, 9TH FLR, NEW YORK, NY 10013-1917 USA	DEC	18	NEW YORK		J	NATURE PUBLISHING GROUP	2013		Blencowe, H (reprint author), London Sch Hyg & Trop Med, Fac Epidemiol & Populat Hlth, London WC1, England.				0031-3998	PEDIATRIC RESEARCH
A00161	This study used a soccer context to examine the relations between scores and judgments of goal sizes. In Experiment 1, 18 participants (4 women, 14 men; M age = 21.9 yr., SD = 0.9) kicked balls into 5 goals of different sizes. Participants' estimates of the goal size correlated positively with their scores. In Experiment 2, 17 participants (3 women, 14 men; M age = 22.1 yr., SD = 1.0) kicked the …	;;Jin, Zheng;;Lee, Yang		;;Jin, Z;;Lee, Y			855								10.2466/24.27.PMS.117x26z0	Article		zhjin@ucdavis.edu; yangleepsy@yahoo.co.kr	867	;;;;				AA4RF		QUIET EYE DURATION; AFFORDANCES; INFORMATION; PERCEPTION	3	PERCEPT MOTOR SKILL	Percept. Mot. Skills	English		35		PO BOX 9229, MISSOULA, MT 59807-9229 USA	DEC	13	MISSOULA		J	AMMONS SCIENTIFIC, LTD	2013		Jin, Z (reprint author), Zhengzhou Normal Univ, Inst Sci Educ, Zhengzhou, Peoples R China.				0031-5125	PERCEPTUAL AND MOTOR SKILLS
A00162	Innovation is an important topic in economics. This paper highlights duopoly innovation under the Hotel ling model with game theory approaches. This paper argues that market power, as measured by the cost advantage of a dominant firm over its rival, serves to enhance the incentive to innovate in a Hotel ling model of spatial competition. This result implies that a firm with cost advantage will ha…	Nie, Pu-yan		Nie, PY			474							innovation; spatial duopoly; game theory; case study		Article		pynie2013@163.com	486	;;;;				AA0XB		COMPETITION; MONOPOLY; BEHAVIOR	4	PRAGUE ECON PAP	Prague Econ. Pap.	English		22		OECONOMICA PUBL, NAM W CHIRCHILLA 4, PRAGUE 3, CZ-130 67, CZECH REPUBLIC	DEC	13	PRAGUE 3		J	UNIV ECONOMICS-PRAGUE	2013		Nie, PY (reprint author), Jinan Univ, Inst Ind Econ, Guangzhou 510632, Guangdong, Peoples R China.	Business & Economics			1210-0455	PRAGUE ECONOMIC PAPERS
A00163	This paper adopts a methodology of asymmetrical analyses to investigate the relevant importance of spectator sport attributes in terms of their non-linear associations with the benefits that fans experience while watching sports. Questionnaires tapping 16 attributes (e.g., teamwork, sportsmanship, level of competition) and 16 benefits (e.g., good mood, exciting experience, support for my favorite…	Gau, Li-Shiue		Gau, LS			786								10.2466/01.05.PR0.113x29z9	Article		lishiuegau@gmail.com	803	;;;;				AA4NJ		BRAND EQUITY; CONSUMPTION	3	PSYCHOL REP	Psychol. Rep.	English		44		PO BOX 9229, MISSOULA, MT 59807-9229 USA	DEC	18	MISSOULA		J	AMMONS SCIENTIFIC, LTD	2013		Gau, LS (reprint author), Asia Univ, Dept Leisure & Recreat Management, 500 Lioufeng Rd, Taichung 41354, Taiwan.				0033-2941	PSYCHOLOGICAL REPORTS
A00164	Drawing on a nationwide representative data from the Chinese General Social Survey 2010, this research examines the relationship between educational attainment and self-rated health in mainland China. It is shown that educational attainment can significantly promote an individual's self-rated health. Besides, the positive effect of educational attainment on self-rated health is stronger for males…	;;Hu, Anning;;Hibel, Jacob		;;Hu, AN;;Hibel, J			674							;;Educational attainment; Self-rated health; China; Economic condition;;;Sense of self-control	10.1016/j.soscij.2013.04.013	Article		huanning55@hotmail.com; jhibel@purdue.edu	680	;;;;				AA5ML		;;URBAN CHINA; SOCIOECONOMIC-STATUS; CIGARETTE-SMOKING; ECONOMIC-REFORM;;;RETURNS; DISEASE; INCOME	4	SOC SCI J	Soc. Sci. J.	English		45		PO BOX 211, 1000 AE AMSTERDAM, NETHERLANDS	DEC	7	AMSTERDAM		J	ELSEVIER SCIENCE BV	2013		Hu, AN (reprint author), 1137 Liberal Arts Bldg,Handan Rd, Shanghai 200433, Peoples R China.				0362-3319	SOCIAL SCIENCE JOURNAL
A00165	For the purposes of this study, we will construct a static monopolistically-competitive computable general equilibrium model to quantify the endogenous productivity spillovers from foreign and domestic firms, using the Chinese economy as a case study. Our simulation results indicate: (i) that the net spillover effects are positive in terms of national total output, GDP and welfare; (ii) that both…	;;Deng, Ziliang;;Falvey, Rod;;Blake, Adam		;;Deng, ZL;;Falvey, R;;Blake, A			369							;;productivity spillovers; foreign direct investment; computable general;;equilibrium model	10.1111/asej.12019	Article		ziliang.deng@ruc.edu.cn	389	;;;;				297DK		;;TECHNOLOGY SPILLOVERS; VERTICAL SPILLOVERS; DOMESTIC FIRMS; INWARD FDI;;;LINKAGES; IMPACT; TRADE; PERFORMANCE; COMPETITION; EFFICIENCY	4	ASIAN ECON J	Asian Econ. J.	English		46		111 RIVER ST, HOBOKEN 07030-5774, NJ USA	DEC	21	HOBOKEN		J	WILEY-BLACKWELL	2013		Deng, ZL (reprint author), Renmin Univ China, Sch Business, Beijing 100872, Peoples R China.	Business & Economics			1351-3958	ASIAN ECONOMIC JOURNAL
A00166	Despite their potential health benefits, the controversial nature surrounding the use of GM technology in biofortified crops remains a subject of discussion. This paper investigates the role of information on willingness-to-pay for folate-biofortified rice in a Chinese folate-deficient region. We conducted second price auctions with 252 women of childbearing age, split up into two target groups b…	;;Steur, Hans D.;;Buysse, Jeroen;;Feng, Shuyi;;Gellynck, Xavier		;;Steur, HD;;Buysse, J;;Feng, SY;;Gellynck, X			391							;;China; economic valuation; experimental auctions; folate;;biofortification; genetically modified rice; information effects;;;willingness-to-pay	10.1111/asej.12020	Article		hans.desteur@ugent.be	408	;;;;				297DK		;;EXPERIMENTAL AUCTIONS; MODIFIED FOODS; GM FOODS; BIOFORTIFIED RICE;;;GOLDEN RICE; FOLIC-ACID; ACCEPTANCE; VALUATION; VALUES; METAANALYSIS	4	ASIAN ECON J	Asian Econ. J.	English		53		111 RIVER ST, HOBOKEN 07030-5774, NJ USA	DEC	18	HOBOKEN		J	WILEY-BLACKWELL	2013		Steur, HD (reprint author), Univ Ghent, Dept Agr Econ, Fac Biosci Engn, Coupure Links 653, B-9000 Ghent, Belgium.	Business & Economics			1351-3958	ASIAN ECONOMIC JOURNAL
A00167	The patterns of hospitals' behavioural changes in response to different insurance systems and payment arrangements have been well documented in the literature on health economics and policy. To understand these changes, it is necessary to look at the shifts in fundamental economic incentives. Meanwhile, hospital practices are also subject to adjustment when administrative tools are realigned. Thi…	;;He, Alex Jingwei;;Qian, Jiwei		;;He, AJ;;Qian, JW			946							;;cost containment; hospital behaviour; cost inflation; health policy;;;China	10.1017/S0305741013001112	Article		jwhe@ied.edu.hk; eaiqj@nus.edu.sg	969	;;;;				298XI		HEALTH SYSTEM REFORM; REIMBURSEMENT; LESSONS; HAINAN; CARE	216	CHINA QUART	China Q.	English		26		32 AVENUE OF THE AMERICAS, NEW YORK, NY 10013-2473 USA	DEC	24	NEW YORK		J	CAMBRIDGE UNIV PRESS	2013		He, AJ (reprint author), Hong Kong Inst Educ, Dept Asian & Policy Studies, Hong Kong, Hong Kong, Peoples R China.	Area Studies			0305-7410	CHINA QUARTERLY
A00168	We use the Chinese College Student Survey, conducted in 2010, to examine levels of poverty among students on China's campuses. With the poverty line defined as the college-specific expenditures a student needs to maintain a basic living standard on campus, we find that 22 per cent of college students in China are living in poverty. Poverty is more severe among students from rural or western parts…	;;Li, Hongbin;;Meng, Lingsheng;;Shi, Xinzheng;;Wu, Binzhen		;;Li, HB;;Meng, LS;;Shi, XZ;;Wu, BZ			970							poverty; financial aid; financial sources; higher education; China	10.1017/S0305741013001082	Article		wubzh@sem.tsinghua.edu.cn	992	;;;;				298XI		RURAL CHINA; INEQUALITY; URBAN	216	CHINA QUART	China Q.	English		31		32 AVENUE OF THE AMERICAS, NEW YORK, NY 10013-2473 USA	DEC	23	NEW YORK		J	CAMBRIDGE UNIV PRESS	2013		Wu, BZ (reprint author), Tsinghua Univ, Sch Econ & Management, Beijing 100084, Peoples R China.	Area Studies			0305-7410	CHINA QUARTERLY
A00169		Corbett, John F.		Corbett, JF			1069								10.1017/S0305741013001203	Book Review		johnfcorbett@atmc.net	1071	;;;;				298XI			216	CHINA QUART	China Q.	English		1		32 AVENUE OF THE AMERICAS, NEW YORK, NY 10013-2473 USA	DEC	5	NEW YORK		J	CAMBRIDGE UNIV PRESS	2013		Corbett, JF (reprint author), CENTRA Technol Inc, Burlington, MA 01803 USA.	Area Studies			0305-7410	CHINA QUARTERLY
A00170		Shen, Zhihua		Shen, ZH			1084								10.1017/S030574101300129X	Book Review		shenzhihua0420@vip.sina.com	1085	;;;;				298XI			216	CHINA QUART	China Q.	English		1		32 AVENUE OF THE AMERICAS, NEW YORK, NY 10013-2473 USA	DEC	4	NEW YORK		J	CAMBRIDGE UNIV PRESS	2013		Shen, ZH (reprint author), E China Normal Univ, Ctr Cold War Int Hist Studies, Shanghai 200062, Peoples R China.	Area Studies			0305-7410	CHINA QUARTERLY
A00171		Tiedemann, R. G.		Tiedemann, RG			1090									Book Review		rt25@soas.ac.uk	1092	;;;;				298XI			216	CHINA QUART	China Q.	English		1		32 AVENUE OF THE AMERICAS, NEW YORK, NY 10013-2473 USA	DEC	5	NEW YORK		J	CAMBRIDGE UNIV PRESS	2013		Tiedemann, RG (reprint author), Shandong Univ, Sch Hist & Culture, Jinan, Shandong, Peoples R China.	Area Studies			0305-7410	CHINA QUARTERLY
A00172		Veg, Sebastian		Veg, S			1093								10.1017/S0305741013001343	Book Review		sveg@cefc.com.hk	1095	;;;;				298XI			216	CHINA QUART	China Q.	English		1		32 AVENUE OF THE AMERICAS, NEW YORK, NY 10013-2473 USA	DEC	5	NEW YORK		J	CAMBRIDGE UNIV PRESS	2013		Veg, S (reprint author), French Ctr Res Contemporary China CEFC, Hong Kong, Hong Kong, Peoples R China.	Area Studies			0305-7410	CHINA QUARTERLY
A00173	What is the impact of a bank failure on the whole banking industry? To resolve this issue, the paper develops a transfer entropy-based method to determine the interbank exposure matrix between banks. This method constructs the interbank market structure by calculating the transfer entropy matrix using bank stock price sequences. This paper also evaluates the stability of Chinese banking system by…	;;Li, Jianping;;Liang, Changzhi;;Zhu, Xiaoqian;;Sun, Xiaolei;;Wu, Dengsheng		;;Li, JP;;Liang, CZ;;Zhu, XQ;;Sun, XL;;Wu, DS			5549							interbank exposure matrix; risk contagion; transfer entropy	10.3390/e15125549	Article		;;ljp@casipm.ac.cn; liangchangzhi12345@gmail.com;;;xiaoqian@mail.ustc.edu.cn; xlsun@casipm.ac.cn; wds@casipm.ac.cn	5564	;;;;		;;National Natural Science Foundation of China [71071148, 71003091]; Key;;Research Program of Institute of Policy and Management, Chinese Academy;;of Sciences [Y201171Z05]; Youth Innovation Promotion Association of;;Chinese Academy of Sciences	;;This research is supported by National Natural Science Foundation of;;China (No. 71071148, No. 71003091), Key Research Program of Institute of;;Policy and Management, Chinese Academy of Sciences (Y201171Z05), the;;Youth Innovation Promotion Association of Chinese Academy of Sciences.	298QP		SYSTEMIC RISK; INFORMATION-FLOW; EXPOSURES; EARNINGS	12	ENTROPY-SWITZ	Entropy	English		31	li, jianping/0000-0003-4976-4119; WU, dengsheng/0000-0002-6162-1287	POSTFACH, CH-4005 BASEL, SWITZERLAND	DEC	16	BASEL		J	MDPI AG	2013	li, jianping/A-9544-2012; WU, dengsheng/D-2600-2010	Li, JP (reprint author), Chinese Acad Sci, Inst Policy & Management, Beijing 100190, Peoples R China.	Physics			1099-4300	ENTROPY
A00174	;;Background: The concept of caring is important to both patients and nurses. If patients and nurses perceive caring behaviours differently, patients may not have their needs met or will be dissatisfied with the nursing.;;Aim: This study conducted in mainland China compared the perceptions of nurses and patients concerning nurses' caring behaviours.;;Methods: From November 2011 to June 2012, 680 …	;;He, T.;;Du, Y.;;Wang, L.;;Zhong, Z. F.;;Ye, X. C.;;Liu, X. H.		;;He, T;;Du, Y;;Wang, L;;Zhong, ZF;;Ye, XC;;Liu, XH			487							Caring; China; Nurses; Patients; Perception	10.1111/inr.12058	Article		ye_xch8639@163.com; xhliu@smmu.edu.cn	493	;;;;		National Natural Science Foundation of China [71073169]	;;The research was funded by the National Natural Science Foundation of;;China, no. 71073169.	297CZ		BEHAVIORS; CARE	4	INT NURS REV	Int. Nurs. Rev.	English		28		111 RIVER ST, HOBOKEN 07030-5774, NJ USA	DEC	7	HOBOKEN		J	WILEY-BLACKWELL	2013		Liu, XH (reprint author), Second Mil Med Univ, Sch Nursing, 800 Xiangyin Rd, Shanghai 200433, Peoples R China.	Nursing			0020-8132	INTERNATIONAL NURSING REVIEW
A00175	;;Aims: The purpose of this article is to explore factors influencing adherence to exercise in Chinese people with type 2 diabetes (T2D). The findings can be used to explain exercise behaviours and develop interventions to improve the level of adherence to exercise.;;Methods: A qualitative approach was used in this study. Data were collected at Nantong City, China. A purposive sampling scheme was…	;;He, W.;;Zhang, Y.;;Zhao, F.		;;He, W;;Zhang, Y;;Zhao, F			494							Adherence; China; Diabetes; Exercise	10.1111/inr.12046	Article		zhaofangfangntu@163.com	500	;;;;				297CZ		;;PHYSICAL-ACTIVITY; PREVALENCE; BARRIERS; ADULTS; COMMUNICATION;;;FACILITATORS; ADHERENCE; INTERASIA; MELLITUS; PROGRAM	4	INT NURS REV	Int. Nurs. Rev.	English		24		111 RIVER ST, HOBOKEN 07030-5774, NJ USA	DEC	7	HOBOKEN		J	WILEY-BLACKWELL	2013		Zhao, F (reprint author), Nantong Univ, Sch Nursing, 19 Qixiu Rd, Nantong City 226001, Jiangsu, Peoples R China.	Nursing			0020-8132	INTERNATIONAL NURSING REVIEW
A00176	;;Objectives: This study aimed at investigating the effects of propofol on the expression of hippocampal neuronal nitric oxide synthase (nNOS) and carboxy-terminal PDZ ligand of nNOS (CAPON) in stressed rats after electroconvulsive shock (ECS).;;Methods: Sprague-Dawley rats were stressed repeatedly for 28 days to establish a stressed model. Forty stressed rats were randomly divided into 4 groups …	;;Lv, Feng;;Shen, Yi-wei;;Peng, Li-hua;;Li, Ping;;Luo, Jie;;Wei, Ke;;Li, Wei;;Chen, Jing;;Min, Su		;;Lv, F;;Shen, YW;;Peng, LH;;Li, P;;Luo, J;;Wei, K;;Li, W;;Chen, J;;Min, S			297							;;propofol; electroconvulsive therapy; depression; neuronal nitric oxide;;synthase; carboxy-terminal PDZ ligand of neuronal nitric oxide synthase	10.1097/YCT.0b013e318290fa17	Article		minsu89011068@yahoo.com.cn	302	;;;;		National Natural Science Foundation of China [30972831, 81271501]	;;This work was supported by the National Natural Science Foundation of;;China (no. 30972831 and 81271501).	298ZB		;;PROTEIN-KINASE-II; SPINAL-CORD; DEPRESSED RATS; RECEPTOR; POTENTIATION;;;THERAPY; MEMORY; CAPON; ACTIVATION; MECHANISM	4	J ECT	J. ECT	English		35		530 WALNUT ST, PHILADELPHIA, PA 19106-3621 USA	DEC	6	PHILADELPHIA		J	LIPPINCOTT WILLIAMS & WILKINS	2013		Min, S (reprint author), Chongqing Med Univ, Affiliated Hosp 1, Dept Anesthesiol, 1st Youyi Rd, Chongqing 400016, Peoples R China.	Behavioral Sciences; Psychiatry			1095-0680	JOURNAL OF ECT
A00177		;;Veeck, Ann;;Yu, Hongyan;;Yu, Fang;;Zhu, Hong;;Veeck, Gregory;;Palan, Kay M.		;;Veeck, A;;Yu, HY;;Yu, F;;Zhu, H;;Veeck, G;;Palan, KM			404									Meeting Abstract			404	;;;;				302HQ			4	J MACROMARKETING	J. Macromarketing	English		0		2455 TELLER RD, THOUSAND OAKS, CA 91320 USA	DEC	1	THOUSAND OAKS		J	SAGE PUBLICATIONS INC	2013			Business & Economics			0276-1467	JOURNAL OF MACROMARKETING
A00178	Several rehabilitation robots for upper limbs have been introduced so far, and clinical effectiveness was reported in several studies for the aged people or patients with stroke. Upper limb motor deficits of the patients have to be identified during the motor training, which requires the flexibility of mechanical structure. However, the users have difficulties in driving the previous robotic arms…	;;Li, Chong;;Liu, Enchen;;Ji, Linhong	1340021	;;Li, C;;Liu, EC;;Ji, LH										;;Stroke; upper limb rehabilitation robot; circle tracking task;;;equivalent kinematic model; parallel robotic arms	10.1142/S0219519413400216	Article		lichong11@mails.tsinghua.edu.cn; nice2010@126.com; jilh@tsinghua.edu.cn		;;;;				302YF		STROKE RECOVERY; MOTOR RECOVERY; ARM; THERAPY	6	J MECH MED BIOL	J. Mech. Med. Biol.	English		15		5 TOH TUCK LINK, SINGAPORE 596224, SINGAPORE	DEC	12	SINGAPORE		J	WORLD SCIENTIFIC PUBL CO PTE LTD	2013		Li, C (reprint author), Tsinghua Univ, Dept Mech Engn, State Key Lab Tribol, Bldg 9003,Room 3403, Beijing 100084, Peoples R China.	Biophysics; Engineering		SI	0219-5194	JOURNAL OF MECHANICS IN MEDICINE AND BIOLOGY
A00179	;;Purpose: To examine the level of and factors influencing expectations regarding aging (ERA) among older Chinese adults, and to determine whether leisure-time exercise mediates the association between ERA and functional health status.;;Methods: A population-based, cross-sectional design was utilized in this study. A total of 550 participants completed the face-to-face interview via a questionnai…	;;Li, Xianwen;;Lv, Qiyuan;;Li, Chunyu;;Zhang, Hailian;;Li, Caifu;;Jin, Jinzhen		;;Li, XW;;Lv, QY;;Li, CY;;Zhang, HL;;Li, CF;;Jin, JZ			328							;;Exportation regrading aging; functional health status; leisure-time;;exercise; China	10.1111/jnu.12036	Article		yjlco@yahoo.com.cn	335	;;;;		Jilin Provincial Science and Technology Department in China [20120757]	;;This study was funded by Jilin Provincial Science and Technology;;Department in China (20120757). The authors would like to acknowledge;;all the participants of this study and appreciate Jinji Jin from;;Chaoyangchuan Community Health Service Center of Yanji City, China, for;;giving us access to do pilot testing for the research tools.	297EW		SELF-PERCEPTIONS; DISABILITY; CARE; AGE; DEPRESSION	4	J NURS SCHOLARSHIP	J. Nurs. Scholarsh.	English		31		111 RIVER ST, HOBOKEN 07030-5774, NJ USA	DEC	8	HOBOKEN		J	WILEY-BLACKWELL	2013		Li, CY (reprint author), Yanbian Univ, Sch Nursing, 977 Gongyuan Rd, Yanji, Jilin Province, Peoples R China.	Nursing			1527-6546	JOURNAL OF NURSING SCHOLARSHIP
A00180	Over the next fifty years, the number of older adults is set to reach record levels. Protecting older adults from the age-related effects of cognitive decline is one of the greatest challenges of the next few decades as it places increasing pressure on families, health systems, and economies on a global scale. The disease-state of age-related cognitive decline Alzheimer's disease and other dement…	;;Antoniou, Mark;;Gunasekera, Geshri M.;;Wong, Patrick C. M.		;;Antoniou, M;;Gunasekera, GM;;Wong, PCM			2689							Aging; Language learning; Cognitive decline; Cognitive reserve; Training	10.1016/j.neubiorev.2013.09.004	Review		p.wong@cuhk.edu.hk	2698	;;;;		;;National Science Foundation [BCS-1125144]; National Institutes of Health;;[R01DC008333, K02AG035382]; Northwestern University	;;We would like to acknowledge the financial support of the National;;Science Foundation (BCS-1125144), the National Institutes of Health;;(R01DC008333 and K02AG035382) and Northwestern University.	300UT		;;RANDOMIZED CONTROLLED-TRIAL; FACE-NAME PAIRS; ALZHEIMERS-DISEASE;;;OLDER-ADULTS; ENVIRONMENTAL ENRICHMENT; BRAIN PLASTICITY; LEISURE;;ACTIVITIES; PHYSICAL-ACTIVITY; DENDRITIC SPINES; EXPLICIT-MEMORY	10	NEUROSCI BIOBEHAV R	Neurosci. Biobehav. Rev.	English		208		THE BOULEVARD, LANGFORD LANE, KIDLINGTON, OXFORD OX5 1GB, ENGLAND	DEC	10	OXFORD	2	J	PERGAMON-ELSEVIER SCIENCE LTD	2013		Wong, PCM (reprint author), Chinese Univ Hong Kong, Dept Linguist & Modern Languages, Leung Kau Kui Bldg, Shatin, Hong Kong, Peoples R China.	Behavioral Sciences; Neurosciences & Neurology			0149-7634	NEUROSCIENCE AND BIOBEHAVIORAL REVIEWS
A00181	Are laws of nature necessary, and if so, are all laws of nature necessary in the same way? This question has played an important role in recent discussion of laws of nature. I argue that not all laws of nature are necessary in the same way: conservation laws are perhaps to be regarded as metaphysically necessary. This sheds light on both the modal character of conservation laws and the relationsh…	Wolff, Johanna		Wolff, J			898								10.1086/673715	Article		jwolffphilosophy@gmail.com	906	;;;;				298IW		THEOREM	5	PHILOS SCI	Philos. Sci.	English		9		1427 E 60TH ST, CHICAGO, IL 60637-2954 USA	DEC	9	CHICAGO		J	UNIV CHICAGO PRESS	2013		Wolff, J (reprint author), Univ Hong Kong, Pokfulam Rd, Hong Kong, Hong Kong, Peoples R China.	History & Philosophy of Science			0031-8248	PHILOSOPHY OF SCIENCE
A00182	This study aims to examine the effectiveness of a workplace-based intervention program to improve mental health, work ability, and work productivity in privately owned enterprises in China. A prospective cohort intervention study design was employed in which the intervention program was implemented for 30 months (from July 2009 to December 2012). Nine privately owned retail enterprises in China p…	;;Sun, Jing;;Buys, Nicholas;;Wang, Xinchao		;;Sun, J;;Buys, N;;Wang, XC			406								10.1089/pop.2012.0113	Article		j.sun@griffith.edu.au	414	;;;;		Peking University	;;Drs. Sun, Buys, and Wang declared no conflicts of interest with respect;;to the research, authorship, and/or publication of this article. The;;authors received the following financial support for the research,;;authorship, and/or publication of this article: Funding for data;;collection work was provided by the Peking University.	301II		;;COMORBIDITY-SURVEY-REPLICATION; WORK LOSS; MAJOR DEPRESSION;;;ECONOMIC-IMPACT; DISABILITY; ENVIRONMENT; MANAGEMENT; ILLNESS; COSTS;;;LOST	6	POPUL HEALTH MANAG	Popul. Health Manag.	English		48		140 HUGUENOT STREET, 3RD FL, NEW ROCHELLE, NY 10801 USA	DEC	9	NEW ROCHELLE		J	MARY ANN LIEBERT, INC	2013		Sun, J (reprint author), Griffith Univ, Sch Publ Hlth, Gold Coast Campus, Gold Coast, Q 4222, Australia.	Health Care Sciences & Services			1942-7891	POPULATION HEALTH MANAGEMENT
A00183	Chinese civil servants work in institutional and cultural contexts that are very different from those of their Western counterparts. Very little research has been done to study their job satisfaction. This paper attempts to fill the gap by analyzing data from a survey of 800 civil servants in Beijing. Fifteen independent variables are clustered into three categories: job characteristics, organiza…	;;Yang, Xingkun;;Wang, Weijie		;;Yang, XK;;Wang, WJ			566							job satisfaction; civil servants; China; job characteristics	10.1177/0091026013502169	Article		weijiewa@usc.edu	587	;;;;				298DX		;;PUBLIC-SERVICE MOTIVATION; FEDERAL-GOVERNMENT EMPLOYEES;;;REPUBLIC-OF-CHINA; GENDER-DIFFERENCES; WORK; SECTOR; PAY; TURNOVER;;;REWARDS; SYSTEMS	4	PUBLIC PERS MANAGE	Public Personnel Manage.	English		63		2455 TELLER RD, THOUSAND OAKS, CA 91320 USA	DEC	22	THOUSAND OAKS		J	SAGE PUBLICATIONS INC	2013		Wang, WJ (reprint author), Univ So Calif, Sol Price Sch Publ Policy, 645 W,23rd St,Apt 2, Los Angeles, CA 90007 USA.	Business & Economics; Public Administration			0091-0260	PUBLIC PERSONNEL MANAGEMENT
A00184		;;Zhu, Hou;;Hu, Bin;;Wu, Jiang;;Hu, Xiaolin		;;Zhu, H;;Hu, B;;Wu, J;;Hu, XL			1523									Article		bin_hu@hust.edu.cn	1537	;;;;		National Natural Science Foundation of China [71071065, 71101059]	;;This work was supported by the National Natural Science Foundation of;;China (grant numbers 71071065 and number 71101059).	296ZG		;;LARGE SOCIAL NETWORK; COLLECTIVE DYNAMICS; BOUNDED CONFIDENCE; OPINION;;;PROPAGATION; MINORITY; STRENGTH; TIES	12	SIMUL-T SOC MOD SIM	Simul.-Trans. Soc. Model. Simul. Int.	English		43		1 OLIVERS YARD, 55 CITY ROAD, LONDON EC1Y 1SP, ENGLAND	DEC	15	LONDON		J	SAGE PUBLICATIONS LTD	2013		Hu, B (reprint author), Huazhong Univ Sci & Technol, Sch Management, Wuhan 430074, Peoples R China.	Computer Science		SI	0037-5497	;;SIMULATION-TRANSACTIONS OF THE SOCIETY FOR MODELING AND SIMULATION;;INTERNATIONAL
A00185	In the literature, different axiomatizations of Public Announcement Logic (PAL) have been proposed. Most of these axiomatizations share a "core set" of the so-called "reduction axioms". In this paper, by designing non-standard Kripke semantics for the language of PAL, we show that the proof system based on this core set of axioms does not completely axiomatize PAL without additional axioms and ru…	;;Wang, Yanjing;;Cao, Qinxiang		;;Wang, YJ;;Cao, QX			103							;;Public announcement logic; Reduction axioms; Composition axiom; Dynamic;;epistemic logic; Completeness; Epistemic temporal logic	10.1007/s11229-012-0233-5	Article		y.wang@pku.edu.cn; caoqinxiang@gmail.com	134	;;;;				302RV		KNOWLEDGE		SYNTHESE	Synthese	English		35		VAN GODEWIJCKSTRAAT 30, 3311 GZ DORDRECHT, NETHERLANDS	DEC	32	DORDRECHT		J	SPRINGER	2013		Wang, YJ (reprint author), Peking Univ, Dept Philosophy, Beijing 100871, Peoples R China.	History & Philosophy of Science; Philosophy			0039-7857	SYNTHESE
A00186	The current study evaluates guessing behaviors in a vocabulary size test (VST) and examines whether including an I don't know in a VST may have an impact on the results of the test. One-hundred-fifty first-year students at a university in China took part in the study. They were randomly assigned to three groups. Each group took a different version of the VST: the original VST, the VST with an I d…	Zhang, Xian		Zhang, X			790								10.1002/tesq.98	Article			811	;;;;				297JI		KNOWLEDGE	4	TESOL QUART	Tesol Q.	English		31		111 RIVER ST, HOBOKEN 07030-5774, NJ USA	DEC	22	HOBOKEN		J	WILEY-BLACKWELL	2013		Zhang, X (reprint author), Guangdong Univ Foreign Studies, Fac English Language & Culture, Guangzhou, Guangdong, Peoples R China.	Education & Educational Research; Linguistics			0039-8322	TESOL QUARTERLY
A00187		;;Hafner, Christoph A.;;Chik, Alice;;Jones, Rodney H.		;;Hafner, CA;;Chik, A;;Jones, RH			812								10.1002/tesq.136	Article			815	;;;;				297JI			4	TESOL QUART	Tesol Q.	English		8		111 RIVER ST, HOBOKEN 07030-5774, NJ USA	DEC	4	HOBOKEN		J	WILEY-BLACKWELL	2013		Hafner, CA (reprint author), City Univ Hong Kong, Kowloon, Hong Kong, Peoples R China.	Education & Educational Research; Linguistics			0039-8322	TESOL QUARTERLY
A00188		Hafner, Christoph A.		Hafner, CA			830								10.1002/tesq.135	Article			834	;;;;				297JI			4	TESOL QUART	Tesol Q.	English		9		111 RIVER ST, HOBOKEN 07030-5774, NJ USA	DEC	6	HOBOKEN		J	WILEY-BLACKWELL	2013		Hafner, CA (reprint author), City Univ Hong Kong, Dept English, Kowloon, Hong Kong, Peoples R China.	Education & Educational Research; Linguistics			0039-8322	TESOL QUARTERLY
A00189		Chik, Alice		Chik, A			834								10.1002/tesq.133	Article			839	;;;;				297JI		GAME	4	TESOL QUART	Tesol Q.	English		18		111 RIVER ST, HOBOKEN 07030-5774, NJ USA	DEC	7	HOBOKEN		J	WILEY-BLACKWELL	2013		Chik, A (reprint author), City Univ Hong Kong, Dept English, Kowloon, Hong Kong, Peoples R China.	Education & Educational Research; Linguistics			0039-8322	TESOL QUARTERLY
A00190		Benson, Phil		Benson, P			839								10.1002/tesq.134	Article			843	;;;;				297JI			4	TESOL QUART	Tesol Q.	English		15		111 RIVER ST, HOBOKEN 07030-5774, NJ USA	DEC	6	HOBOKEN		J	WILEY-BLACKWELL	2013		Benson, P (reprint author), Hong Kong Inst Educ, Dept Linguist & Modern Language Studies, Ctr Popular Culture Humanities, Hong Kong, Hong Kong, Peoples R China.	Education & Educational Research; Linguistics			0039-8322	TESOL QUARTERLY
A00191		Jones, Rodney H.		Jones, RH			843								10.1002/tesq.137	Article			848	;;;;				297JI			4	TESOL QUART	Tesol Q.	English		13		111 RIVER ST, HOBOKEN 07030-5774, NJ USA	DEC	7	HOBOKEN		J	WILEY-BLACKWELL	2013		Jones, RH (reprint author), City Univ Hong Kong, Dept English, Kowloon, Hong Kong, Peoples R China.	Education & Educational Research; Linguistics			0039-8322	TESOL QUARTERLY
A00192	The aim of this paper is to present the evolution of aqueduct technologies through the millennia, from prehistoric to medieval times. These hydraulic works were used by several civilizations to collect water from springs and to transport it to settlements, sanctuaries and other targets. Several civilizations, in China and the Americas, developed water transport systems independently, and brought …	;;De Feo, Giovanni;;Angelakis, Andreas N.;;Antoniou, Georgios P.;;El-Gohary, Fatma;;Haut, Benoit;;Passchier, Cees W.;;Zheng, Xiao Yun		;;De Feo, G;;Angelakis, AN;;Antoniou, GP;;El-Gohary, F;;Haut, B;;Passchier, CW;;Zheng, XY			1996							;;Aqua Claudia; Aqua Marcia; Aspendos; Byzantines; Eupalinos; Gier;;;Hellenes; Knossos; Nimes; Minoan; Pergamon; Romans; Segovia; Valens	10.3390/w5041996	Review		;;g.defeo@unisa.it; info@a-angelakis.gr; antonioug@tee.gr;;;fgohary@hotmail.com; bhaut@ulb.ac.be; cpasschi@uni-mainz.de;;;zhengxy68@163.com	2025	;;;;				301FO		;;COMPUTATIONAL FLUID-DYNAMICS; WATER MANAGEMENT; SYSTEM; HERITAGE;;;PERIOD; LIFE; CITY	4	WATER-SUI	Water	English		84		POSTFACH, CH-4005 BASEL, SWITZERLAND	DEC	30	BASEL		J	MDPI AG	2013		De Feo, G (reprint author), Univ Salerno, Dept Ind Engn, Via Giovanni Paolo 2,132, I-84084 Fisciano, SA, Italy.	Water Resources			2073-4441	WATER
A00193	;;BackgroundNo previous studies investigated the interaction of effort-reward imbalance (ERI) and overcommitment on blood pressure. Our aim was to investigate associations of ERI and overcommitment (and their interaction) with blood pressure and hypertension within a Chinese population.;;MethodsSeven hundred thirty-four participants from the Stress and Health in Shenzhen Workers study completed a…	;;Xu, Weixian;;Yu, Haiyi;;Hang, Juan;;Gao, Wei;;Zhao, Yiming;;Guo, Lijun		;;Xu, WX;;Yu, HY;;Hang, J;;Gao, W;;Zhao, YM;;Guo, LJ			1433							;;chinese; effort-reward imbalance; hypertension; job stress;;;overcommitment	10.1002/ajim.22254	Article		gljxwx2009@163.com	1441	;;;;				294IZ		;;CORONARY-HEART-DISEASE; AMBULATORY BLOOD-PRESSURE; WHITE-COLLAR WORKERS;;;JOB STRAIN; GLOBAL BURDEN; RISK-FACTORS; STRESS; MEN; HEALTH; WOMEN	12	AM J IND MED	Am. J. Ind. Med.	English		37		111 RIVER ST, HOBOKEN 07030-5774, NJ USA	DEC	9	HOBOKEN		J	WILEY-BLACKWELL	2013		Guo, LJ (reprint author), Peking Univ, Dept Cardiol, Hosp 3, 49 North Garden Rd, Beijing 100871, Peoples R China.	Public, Environmental & Occupational Health			0271-3586	AMERICAN JOURNAL OF INDUSTRIAL MEDICINE
A00194	Variations in oral paleopathology have been widely documented among groups stemming from different regions or periods to clarify the relationship between human health and type of subsistence. The skeletal materials unearthed around the Great Wall in northern China are suitable for this aim since archeological studies minutely report the changes in subsistence in the area. We examined oral health …	;;Okazaki, Kenji;;Wei Dong;;Zhu Hong		;;Okazaki, KJ;;Wei, D;;Zhu, H			187							;;dental caries; advanced attrition; sex differences; Late Neolithic/Early;;Dynasty period; Spring and Autumn/Warring States period	10.1537/ase.130929	Article		ken_okz@med.tottori-u.ac.jp	201	;;;;		Japan Society for the Promotion of Science	;;Grant sponsorship: Japan Society for the Promotion of Science,;;Postdoctoral Fellowships for Research Abroad.	299SR		;;DENTAL-CARIES PREVALENCE; REVISED METHOD; SKELETAL AGE; JAPAN;;;TRANSITION; PEOPLE; DEATH; DIET	3	ANTHROPOL SCI	Anthropol. Sci.	English		67		;;C/O GALILEO INC, URBAN-OHTSUKA BLDG, 3RD FL, 3-21-10 KITA-OHTSUKA,;;TOSHIMA-KU, TOKYO, 170-0004, JAPAN	DEC	15	TOKYO		J	ANTHROPOLOGICAL SOC NIPPON	2013		Okazaki, KJ (reprint author), Tottori Univ, Fac Med, Dept Anat, 86 Nishi Cho, Yonago, Tottori 6838503, Japan.	Anthropology; Evolutionary Biology			0918-7960	ANTHROPOLOGICAL SCIENCE
A00195	Many companies are facing the challenges of dynamic market and capital shortage. To overcome these challenges, we examine the case in which the company develops early sales strategy that entices customers to commit to their orders at a discount price prior to the selling season. The time between payment and fulfillment of these pre-committed orders provides an opportunity for the company to "lock…	;;Mu, Yinping;;Feng, Yi	1350025	;;Mu, YP;;Feng, Y										Optimization; early sales; production; budgetary constraint	10.1142/S0217595913500255	Article		ypmu@uestc.edu.cn; fengyi@uestc.edu.cn		;;;;		;;National Natural Science Foundation of China [70932005, 71172096];;;Social Science Funding of the Education Ministry of China [10XJC630005]	;;The authors thank the Area Editor Professor T.C. Edwin Cheng and one;;anonymous referee for their constructive comments and recommendations.;;The first author's research is supported by National Natural Science;;Foundation of China (Grant Nos. 70932005, 71172096), and the second;;author's research is supported by the Social Science Funding of the;;Education Ministry of China (Grant No. 10XJC630…	297CQ		BOOKING DISCOUNT PROGRAMS; ADVANCE; BENEFITS; ORDERS	6	ASIA PAC J OPER RES	Asia Pac. J. Oper. Res.	English		18		5 TOH TUCK LINK, SINGAPORE 596224, SINGAPORE	DEC	18	SINGAPORE		J	WORLD SCIENTIFIC PUBL CO PTE LTD	2013		Feng, Y (reprint author), Univ Elect Sci & Technol China, Sch Management & Econ, Chengdu 610054, Peoples R China.	Operations Research & Management Science			0217-5959	ASIA-PACIFIC JOURNAL OF OPERATIONAL RESEARCH
A00196	Precedent research based on data envelopment analysis (DEA) has been conducted to rank and benchmark the achievements of participating nations/regions in the Olympics, while this paper contributes to the Asian Games, with further concerns on two main issues, namely the common comparison basis for ranking decision making units (DMUs) and the reference feasibility between the inefficient DMUs and t…	;;Wu, Huaqing;;Chen, Bo;;Xia, Qiong;;Zhou, Huadong	1350028	;;Wu, HQ;;Chen, B;;Xia, Q;;Zhou, HD										;;Data envelopment analysis (DEA); the Asian games; performance;;measurement; benchmarking	10.1142/S0217595913500280	Article		;;wu.huaqing@gmail.com; okchenbo@mail.ustc.edu.cn; qxia@mail.ustc.edu.cn;;;hdzhou109@163.com		;;;;		National Natural Science Funds of China [71001033, 71001031, 71301039]	;;We would like to thank the anonymous reviewer of this article for;;his/her helpful comments and suggestions. This article is supported by;;the National Natural Science Funds of China under Grants Nos. (71001033,;;71001031, 71301039).	297CQ		;;DATA ENVELOPMENT ANALYSIS; CROSS-EFFICIENCY; OLYMPICS ACHIEVEMENTS;;;MODELS; UNITS; PERFORMANCE; NATIONS	6	ASIA PAC J OPER RES	Asia Pac. J. Oper. Res.	English		22		5 TOH TUCK LINK, SINGAPORE 596224, SINGAPORE	DEC	20	SINGAPORE		J	WORLD SCIENTIFIC PUBL CO PTE LTD	2013		Zhou, HD (reprint author), Hefei Univ Technol, Sch Econ, Hefei 230009, Anhui, Peoples R China.	Operations Research & Management Science			0217-5959	ASIA-PACIFIC JOURNAL OF OPERATIONAL RESEARCH
A00197		Waller, Kathleen	13	Waller, K											10.7771/1481-4374.2306	Book Review		h0991224@hku.hk.edu		;;;;				296NQ			4	CLCWEB-COMP LIT CULT	CLCWEB-Comp. Lit. Cult.	English		14		1207 SOUTH CAMPUS COURTS-E, W LAFAYETTE, IN 47907-1207 USA	DEC	6	W LAFAYETTE		J	PURDUE UNIV PRESS	2013		Waller, K (reprint author), Univ Hong Kong, Hong Kong, Hong Kong, Peoples R China.	Literature			1481-4374	CLCWEB-COMPARATIVE LITERATURE AND CULTURE
A00198	While for wind, solar energy or hydropower, energy supply happens directly from the source to the wind wheels, hydropower turbines or solar panels, in the case of biogas, energy production cannot directly take from the energy source, organic matter, but depends on the institutional structures and farmers' practices involved for making energy available. With the production of bioenergy in rural ar…	;;Bluemling, Bettina;;Mol, Arthur P. J.;;Tu, Qin		;;Bluemling, B;;Mol, APJ;;Tu, Q			10							Biogas; Agriculture; Rural society	10.1016/j.enpol.2013.08.035	Article		bettina.bluemling@wur.nl	17	;;;;		;;Netherlands Organisation for Scientific Research (NWO); Royal;;Netherlands Academy of Arts and Sciences (KNAW) through the project SURE;;[08-PSA-E-02]	;;This research was carried out in the frame of the project RenErGo;;(Renewable Energy Governance in China and the EU, CO-REACH 64-090),;;financed by the Netherlands Organisation for Scientific Research (NWO).;;Also the Royal Netherlands Academy of Arts and Sciences (KNAW) provided;;financial support through the project SURE (08-PSA-E-02).	294ZC		ENERGY; CHINA		ENERG POLICY	Energy Policy	English		19		THE BOULEVARD, LANGFORD LANE, KIDLINGTON, OXFORD OX5 1GB, OXON, ENGLAND	DEC	8	OXFORD		J	ELSEVIER SCI LTD	2013		Bluemling, B (reprint author), Wageningen Univ, Environm Policy Grp, Hollandseweg 1, NL-6706 KN Wageningen, Netherlands.	Energy & Fuels; Environmental Sciences & Ecology			0301-4215	ENERGY POLICY
A00199	The Chinese government since 1995 has carried out programs for the construction of household biogas digesters in the Chinese countryside. Despite the large governmental spending in the building of household biogas digesters, only 12.16% of the households suitable to produce and use biogas, have built a digester (Li, 2009). This article asks which factors on the household level may be important fo…	;;Qu, Wei;;Tu, Qin;;Bluemling, Bettina		;;Qu, W;;Tu, Q;;Bluemling, B			26							Biogas; Rural China; Household behavior	10.1016/j.enpol.2013.07.019	Article		tuqin@cass.org.cn	33	;;;;		;;Royal Netherlands Academy of Arts and Sciences (KNAW) [08-PSA-E-02];;;Chinese Ministry of Science and Technology (MoST) [2008DFA90630];;;RenErGo (Renewable Energy Governance in China and the EU);;[CO-REACH64-090]	;;This research was carried out within the research project SURE;;(SUstainable Natural REsource Use in Rural China,;;http://sure.ernasia.org/), which is funded by the Royal Netherlands;;Academy of Arts and Sciences (KNAW), grant 08-PSA-E-02, and the Chinese;;Ministry of Science and Technology (MoST), grant 2008DFA90630, as part;;of the Programme Strategic Scientific Alliances, as well as in the f…	294ZC		HOUSEHOLD		ENERG POLICY	Energy Policy	English		14		THE BOULEVARD, LANGFORD LANE, KIDLINGTON, OXFORD OX5 1GB, OXON, ENGLAND	DEC	8	OXFORD		J	ELSEVIER SCI LTD	2013		Tu, Q (reprint author), Beijing Normal Univ, Emerging Markets Inst, Beijing 100875, Peoples R China.	Energy & Fuels; Environmental Sciences & Ecology			0301-4215	ENERGY POLICY
A00200	Under the dual pressures of an energy crisis and rising greenhouse gas emissions, biomass energy development and utilisation has become part of the national energy strategy in China. The last decade has witnessed a strong promotion of both centralised and decentralised bio-energy systems in rural China. The government seems to have a strong preference for centralised (village-based) bio-energy sy…	;;He, Guizhen;;Bluemling, Bettina;;Mol, Arthur P. J.;;Zhang, Lei;;Lu, Yonglong		;;He, GZ;;Bluemling, B;;Mol, APJ;;Zhang, L;;Lu, YL			34							;;Centralized bio-energy system; Household bio-digester; Performance;;evaluation	10.1016/j.enpol.2013.06.019	Article		gzhe@rcees.ac.cn	43	;;;;		;;National Natural Science Foundation of China [71103175]; Netherlands;;Organization for Scientific Research (NWO); Royal Netherlands Academy of;;Arts and Sciences (KNAW) [08-PSA-E-02]	;;This research was financed by the National Natural Science Foundation of;;China (71103175) and the Netherlands Organization for Scientific;;Research (NWO) and carried out in the frame of the project RenErGo;;(Renewable Energy Governance in China and the EU, CO-REACH64-090). Also;;the Royal Netherlands Academy of Arts and Sciences (KNAW) provided;;financial support (grant 08-PSA-E-02). Thanks to…	294ZC		SUSTAINABILITY; TRANSITION; MANAGEMENT; BIOFUELS; POLICY		ENERG POLICY	Energy Policy	English		36		THE BOULEVARD, LANGFORD LANE, KIDLINGTON, OXFORD OX5 1GB, OXON, ENGLAND	DEC	10	OXFORD		J	ELSEVIER SCI LTD	2013	jingjing, yuan/N-1658-2013	He, GZ (reprint author), Chinese Acad Sci, Res Ctr Ecoenvironm Sci, State Key Lab Urban & Reg Ecol, 18 Shuangqing Rd, Beijing 100085, Peoples R China.	Energy & Fuels; Environmental Sciences & Ecology			0301-4215	ENERGY POLICY
A00201	Methanol is considered as one of the potential materials for fossil-based fuels because of its available applications in the fields of fuels and chemical materials. China has become the biggest methanol production country since 2006; hence, analysing the consumption, production and transportation of methanol in China has great importance. In the present article, the current status of methanol fro…	;;Su, Li-Wang;;Li, Xiang-Rong;;Sun, Zuo-Yu		;;Su, LW;;Li, XR;;Sun, ZY			130							Methanol; Review; China	10.1016/j.enpol.2013.08.031	Review		suliwang1987@163.com; Prof.LiXR@yahoo.com; zuoyu.sun@yahoo.com	138	;;;;				294ZC		;;CARBON MOLECULAR-SIEVE; NATURAL-GAS; RENEWABLE ENERGY; ACETIC-ACID;;;FORMALDEHYDE; CATALYSTS; GASIFICATION; FUEL; DEHYDROGENATION; EMISSIONS		ENERG POLICY	Energy Policy	English		58		THE BOULEVARD, LANGFORD LANE, KIDLINGTON, OXFORD OX5 1GB, OXON, ENGLAND	DEC	9	OXFORD		J	ELSEVIER SCI LTD	2013		Sun, ZY (reprint author), Beijing Jiaotong Univ, Sch Mech & Elect Control Engn, 3 Shang Yuan Cun, Beijing 100044, Peoples R China.	Energy & Fuels; Environmental Sciences & Ecology			0301-4215	ENERGY POLICY
A00202	During the 2006-2008 period, there were 386 demonstration projects for renewable energy application buildings (REAB) organised by Chinese government, with a total area of approximately 40,420,000 m(2). By the end of 2011, the vast majority of these projects had been completed and had passed the final acceptance. This paper analyses the measures taken by the Chinese government, including economic …	;;Liu, Xingmin;;Ren, Hong;;Wu, Yong;;Kong, Deping		;;Liu, XM;;Ren, H;;Wu, Y;;Kong, DP			382							;;Renewable energy application buildings; Demonstration projects; Policy;;analyses	10.1016/j.enpol.2013.08.091	Article		liuxingmin_cn@163.com	397	;;;;		;;Department of Building Energy Efficiency and Science Technology; MOHURD;;;Department of Economic Construction, MOF	;;My deep appreciation goes to the Department of Building Energy;;Efficiency and Science & Technology, MOHURD, and the Department of;;Economic Construction, MOF, for their support and assistance during my;;survey of the Demonstration Projects for REAB and for the related policy;;consultation provided by them.	294ZC				ENERG POLICY	Energy Policy	English		44		THE BOULEVARD, LANGFORD LANE, KIDLINGTON, OXFORD OX5 1GB, OXON, ENGLAND	DEC	16	OXFORD		J	ELSEVIER SCI LTD	2013		Liu, XM (reprint author), Chongqing Univ, Fac Construct Management & Real Estate, Chongqing 400045, Peoples R China.	Energy & Fuels; Environmental Sciences & Ecology			0301-4215	ENERGY POLICY
A00203	In China, most energy prices are controlled by the government and are under-priced, which means energy subsidies existing. Reforming energy subsidies have important implications for sustainable development through their effects on energy price, energy use and CO2 emission. This paper applies a price-gap approach to estimate China's fossil-fuel related subsidies with the consideration of the exter…	;;Jiang, Zhujun;;Tan, Jijun		;;Jiang, ZJ;;Tan, JJ			599							Energy prices; Energy subsidies; Input-output model	10.1016/j.enpol.2013.08.059	Article		jiang.zhujun@mail.shufe.edu.cn	606	;;;;		;;Ministry of Education Foundation of China [12YJC790081]; "Chen Guang";;Program of Shanghai Municipal Education Commission [12CG45]; Open;;Research Fund Program of Key Laboratory of Mathematical Economics;;(SUFE), Ministry of Education [201301KF01]; Leading Academic Discipline;;Program; 211 Project for Shanghai University of Finance and Economics;;(the 4th phase)	;;The paper is supported by the Ministry of Education Foundation of China;;(12YJC790081), "Chen Guang" Program (12CG45) of Shanghai Municipal;;Education Commission; the Open Research Fund Program of Key Laboratory;;of Mathematical Economics (SUFE), Ministry of Education(201301KF01);;;Leading Academic Discipline Program, 211 Project for Shanghai University;;of Finance and Economics (the 4th phase).	294ZC		IMPACT; EMISSIONS; COSTS		ENERG POLICY	Energy Policy	English		46		THE BOULEVARD, LANGFORD LANE, KIDLINGTON, OXFORD OX5 1GB, OXON, ENGLAND	DEC	8	OXFORD		J	ELSEVIER SCI LTD	2013		Jiang, ZJ (reprint author), Shanghai Univ Finance & Econ, Inst Adv Res, Shanghai 200433, Peoples R China.	Energy & Fuels; Environmental Sciences & Ecology			0301-4215	ENERGY POLICY
A00204	Energy resources for rural electrification are variable and widely dispersed, such that a solution for one region might not be appropriate for another. This study evaluates the feasibility of renewable energy technologies, centralized grid extension and local coal-fired power for rural areas that currently do not have sufficient access to electricity. The renewable power generation options consid…	;;Holtmeyer, Melissa L.;;Wang, Shuxiao;;Axelbaum, Richard L.		;;Holtmeyer, ML;;Wang, SX;;Axelbaum, RL			708							Distributed generation; Renewable energy; Rural electrification	10.1016/j.enpol.2013.07.087	Article		axelbaum@wustl.edu	715	;;;;		;;McDonnell Academy Global Energy and Environment Partnership (MAGEEP) at;;Washington University in St. Louis; Tsinghua University; STAR;;[FP917159]; U.S. Environmental Protection Agency (EPA)	;;This work was funded in part by a grant from the McDonnell Academy;;Global Energy and Environment Partnership (MAGEEP) at Washington;;University in St. Louis in collaboration with Tsinghua University. This;;research was also supported in part under STAR Fellowship Assistance;;Agreement no. FP917159 awarded by the U.S. Environmental Protection;;Agency (EPA). It has not been formally reviewed by …	294ZC		CHINA; ELECTRIFICATION; ENERGY		ENERG POLICY	Energy Policy	English		28	wang, shuxiao/0000-0001-9727-1963	THE BOULEVARD, LANGFORD LANE, KIDLINGTON, OXFORD OX5 1GB, OXON, ENGLAND	DEC	8	OXFORD		J	ELSEVIER SCI LTD	2013	wang, shuxiao/H-5990-2011	Axelbaum, RL (reprint author), Washington Univ, Dept Energy Environm & Chem Engn, St Louis, MO 63130 USA.	Energy & Fuels; Environmental Sciences & Ecology			0301-4215	ENERGY POLICY
A00205	Smart grids represent one of the most significant evolutionary changes in energy management systems as they enable decentralised energy systems, the use of large-scale renewable energy as well as major improvements in demand-side-management. Japan is one of the pioneers in smart grid deployment. The Japanese model is characterised by a government-led, community-oriented, and business-driven appro…	;;Mah, Daphne Ngar-yin;;Wu, Yun-Ying;;Ip, Jasper Chi-man;;Hills, Peter Ronald		;;Mah, DNY;;Wu, YY;;Ip, JCM;;Hills, PR			726							Smart grids; Japan; State	10.1016/j.enpol.2013.07.106	Article		daphnemah@hkbu.edu.hk	737	;;;;		;;Initiative on Clean Energy and Environment (ICEE) at the University of;;Hong Kong; Faculty Research Grant of the Faculty of Social Sciences at;;Hong Kong Baptist University [FRG2/12-13/057]	;;We thank our anonymous interviewees in Japan for contributing their;;insights and providing useful information. We would like to acknowledge;;the support of the Initiative on Clean Energy and Environment (ICEE) at;;the University of Hong Kong, and the Faculty Research Grant of the;;Faculty of Social Sciences at Hong Kong Baptist University;;[FRG2/12-13/057], which funded the research on which t…	294ZC		;;ELECTRIC VEHICLES; BUSINESS MODELS; POLICY-MAKING; POWER; SYSTEMS;;;CHINA; FUKUSHIMA; INDUSTRY; LESSONS; MARKET		ENERG POLICY	Energy Policy	English		73		THE BOULEVARD, LANGFORD LANE, KIDLINGTON, OXFORD OX5 1GB, OXON, ENGLAND	DEC	12	OXFORD		J	ELSEVIER SCI LTD	2013		Mah, DNY (reprint author), Hong Kong Baptist Univ, Dept Geog, 12-F,Acad & Adm Bldg,15 Baptist Univ Rd, Kowloon Tong, Hong Kong, Peoples R China.	Energy & Fuels; Environmental Sciences & Ecology			0301-4215	ENERGY POLICY
A00206	China's wind power is in an embarrassing state. Along with its dramatic development since 2005, its curtailment ratio has been rising. Although this could be attributed to both physical and institutional factors, it is the institutional obstacles, mainly resulting from the adjustment difficulties of interests distribution, that have exercised a greater impact. The stakeholders relating to wind po…	;;Zhao, Xiaoli;;Zhang, Sufang;;Zou, Yasheng;;Yao, Jin		;;Zhao, XL;;Zhang, SF;;Zou, YS;;Yao, J			814							Wind power; Vested interests; China	10.1016/j.enpol.2013.08.092	Article		email99zxl@vip.sina.com	822	;;;;		;;National Natural Science Foundation of China [71073053, 71373078];;;Energy Foundation (America) [G-1004-12366]	;;The authors wish to thank the National Natural Science Foundation of;;China (Grant number 71073053, 71373078. and the Energy Foundation;;(America) for their funding of this study (Grant number G-1004-12366).;;We appreciate the anonymous reviewer for his/her valuable comments,;;which was helpful to improve the article greatly. Meanwhile, we;;appreciate P. Andrews-Speed PhD, for his suggestions i…	294ZC		RENEWABLE ENERGY; POLICIES		ENERG POLICY	Energy Policy	English		23		THE BOULEVARD, LANGFORD LANE, KIDLINGTON, OXFORD OX5 1GB, OXON, ENGLAND	DEC	9	OXFORD		J	ELSEVIER SCI LTD	2013		Zhao, XL (reprint author), North China Elect Power Univ, Inst Low Carbon Econ & Trade, Sch Econ & Management, Beijing, Peoples R China.	Energy & Fuels; Environmental Sciences & Ecology			0301-4215	ENERGY POLICY
A00207	In rural China, reducing low-quality fuel consumption and adopting solar technologies can mitigate pollution problems and improve farmers' living conditions. Before advising farmers to convert traditional houses to solar houses, it is necessary to understand their willingness to do so. Based on the theory of planned behaviour (TPB), this study examined nine factors related to farmers' willingness…	;;Li, Xuesong;;Li, Hao;;Wang, Xingwu		;;Li, XS;;Li, H;;Wang, XW			882							Traditional houses; Solar houses; Farmers' willingness	10.1016/j.enpol.2013.09.004	Article		fwangx@alfred.edu	886	;;;;		China Scholarship Council	;;Currently, Xuesong Li is sponsored by the China Scholarship Council as a;;visiting professor at Alfred University. This research was inspired by;;an international collaboration project called Solar Decathlon 2013;;China.	294ZC		HOME SYSTEMS; ENERGY-CONSUMPTION; POLICY; BANGLADESH		ENERG POLICY	Energy Policy	English		26		THE BOULEVARD, LANGFORD LANE, KIDLINGTON, OXFORD OX5 1GB, OXON, ENGLAND	DEC	5	OXFORD		J	ELSEVIER SCI LTD	2013		Wang, XW (reprint author), Alfred Univ, Sch Engn, Alfred, NY 14802 USA.	Energy & Fuels; Environmental Sciences & Ecology			0301-4215	ENERGY POLICY
A00208	With rapid economic growth, the transport sector plays an important role in China's CO2 emissions. The existing research is extensively concerned with transport sector CO2 emissions in recent years, but little attention has been paid to regional differences. This paper investigates CO2 emissions in the transport sector at the national and regional levels using the STIRPAT model and provincial pan…	;;Zhang, Chuanguo;;Nian, Jiang		;;Zhang, CG;;Nian, J			918							Transport sector; Passenger transport; CO2 emissions	10.1016/j.enpol.2013.07.142	Article		cgzhang@xmu.edu.cn	926	;;;;		;;National Social Science Foundation of China [12BJL061]; Program for New;;Century Excellent Talents in University of Ministry of Education of;;China [NCET 12 0327]; Science Cultivation Foundation of Ministry of;;Education of China [11JBP006]	;;The authors would like to thank two anonymous reviewers for their;;valuable comments on our first manuscript. This research is supported by;;National Social Science Foundation of China (No. 12BJL061) and supported;;by Program for New Century Excellent Talents in University of Ministry;;of Education of China (No. NCET 12 0327), and also supported by Science;;Cultivation Foundation of Ministry of…	294ZC		;;CARBON-DIOXIDE EMISSIONS; CONSISTENT COVARIANCE-MATRIX;;;ENERGY-CONSUMPTION; PASSENGER CARS; CLIMATE-CHANGE; ROAD TRANSPORTATION;;;SCENARIO ANALYSIS; GHG EMISSIONS; DEMAND; POPULATION		ENERG POLICY	Energy Policy	English		53		THE BOULEVARD, LANGFORD LANE, KIDLINGTON, OXFORD OX5 1GB, OXON, ENGLAND	DEC	9	OXFORD		J	ELSEVIER SCI LTD	2013		Zhang, CG (reprint author), Xiamen Univ, Sch Econ, Xiamen 361005, Peoples R China.	Energy & Fuels; Environmental Sciences & Ecology			0301-4215	ENERGY POLICY
A00209	There have been growing clamours for carbon-motivated border tax adjustments (CBTAs) targeted at countries that do not accept the carbon emission reduction targets. Currently, China is the largest carbon emitter with large annual incremental carbon emissions and might have to face the challenge of CBTA. Therefore, it is a pressing policy challenge for the government to get prepared for mitigating…	;;Li, Aijun;;Zhang, Aizhen;;Cai, Hongbo;;Li, Xingfeng;;Peng, Shishen		;;Li, AJ;;Zhang, AZ;;Cai, HB;;Li, XF;;Peng, SS			927							;;Carbon-motivated border tax adjustments; Carbon leakage; Unilateral;;climate policy	10.1016/j.enpol.2013.08.020	Article		azzhang2011@gmail.com	934	;;;;		;;Shandong Social Science Planning Fund Program [12DJJJ12]; Independent;;Innovation Foundation of Shandong University (IIFSDU) [2012GN038];;;Ministry of Education Research of Social Sciences Youth Funded Projects;;[13YJC790065]; National Natural Science Foundation of China [71203186,;;71173170]; China Postdoctoral Science Foundation [2013M530309,;;2012T50802]	;;The authors are grateful to two anonymous referees for their valuable;;and insightful suggestions. This article is supported by Shandong Social;;Science Planning Fund Program (Grant No. 12DJJJ12), Independent;;Innovation Foundation of Shandong University (IIFSDU, Grant No.;;2012GN038), the Ministry of Education Research of Social Sciences Youth;;Funded Projects (Grant No. 13YJC790065), National…	294ZC		CLIMATE POLICY; COMPETITIVENESS; INDUSTRY		ENERG POLICY	Energy Policy	English		40		THE BOULEVARD, LANGFORD LANE, KIDLINGTON, OXFORD OX5 1GB, OXON, ENGLAND	DEC	8	OXFORD		J	ELSEVIER SCI LTD	2013		Zhang, AZ (reprint author), Xiamen Univ, Dept English Language & Literature, Coll Foreign Languages & Cultures, Xiamen 361005, Fujian, Peoples R China.	Energy & Fuels; Environmental Sciences & Ecology			0301-4215	ENERGY POLICY
A00210	In the process of setting operational targets to achieve sustainable development of economy, environment and natural resources, estimation of potential energy saving and potential CO2 emission reduction becomes extremely important. This estimation can be conducted based on the energy efficiency evaluation for different decision-making units (DMUs) by data envelopment analysis (DEA). Non-fossil en…	;;Bian, Yiwen;;He, Ping;;Xu, Hao		;;Bian, YW;;He, P;;Xu, H			962							;;Data envelopment analysis (DEA); Energy saving; Carbon dioxide emission;;reduction	10.1016/j.enpol.2013.08.051	Article		ywbian@shu.edu.cn; heping@mail.ustc.edu.cn	971	;;;;		;;national Natural Science Foundation of China [71001094, 71101085,;;71371010]; NSFC major program [71090401/71090400]; Shanghai University;;085 Project-Social Development of Metropolis and Construction of Smart;;City [085SHDX001]; Shanghai Municipal Education Commission [12ZS099]	;;This research was supported by grants from the national Natural Science;;Foundation of China (no. 71001094, 71101085, 71371010), NSFC major;;program (no. 71090401/71090400), Shanghai University 085 Project-Social;;Development of Metropolis and Construction of Smart City (no.;;085SHDX001) and innovation program of Shanghai Municipal Education;;Commission (no. 12ZS099).	294ZC		;;DATA ENVELOPMENT ANALYSIS; CO2 EMISSIONS; EFFICIENCY TRENDS;;;CONSUMPTION; ECONOMY; PERFORMANCE; ELECTRICITY; REGIONS; TARGETS;;;OUTPUTS		ENERG POLICY	Energy Policy	English		42		THE BOULEVARD, LANGFORD LANE, KIDLINGTON, OXFORD OX5 1GB, OXON, ENGLAND	DEC	10	OXFORD		J	ELSEVIER SCI LTD	2013		Bian, YW (reprint author), Shanghai Univ, Sydney Inst Language & Commerce, Shanghai 201800, Peoples R China.	Energy & Fuels; Environmental Sciences & Ecology			0301-4215	ENERGY POLICY
A00211	For a developing country such as China, it is important to select a fair pattern that is suitable for China's national conditions for low carbon-economy development, as it has a direct impact on the success (or not) of low carbon-economy development. This research shows that, under the real-life conditions of China's development, different development patterns should be practised depending on spe…	Dou, Xiangsheng		Dou, XS			1013							Low carbon economy; Development pattern; Nature-oriented development	10.1016/j.enpol.2013.08.089	Article		douxiangsheng@tsinghua.org.cn	1020	;;;;		National Social Science Foundation of China [10XJY004]	;;This study was supported by the National Social Science Foundation of;;China (Grand Number: 10XJY004). We appreciate the generous support from;;the funds.	294ZC		ENERGY		ENERG POLICY	Energy Policy	English		24		THE BOULEVARD, LANGFORD LANE, KIDLINGTON, OXFORD OX5 1GB, OXON, ENGLAND	DEC	8	OXFORD		J	ELSEVIER SCI LTD	2013		Dou, XS (reprint author), Southwest Jiaotong Univ, Sch Publ Adm, Ctr Int Econ Res, Room 0403,Floor 4,Bldg 0,111,North Sect 1, Chengdu 610031, Peoples R China.	Energy & Fuels; Environmental Sciences & Ecology			0301-4215	ENERGY POLICY
A00212	This paper analyses the impact of postponing global mitigation action on abatement costs and energy systems changes in China and India. It compares energy-system changes and mitigation costs from a global and two national energy-system models under two global emission pathways with medium likelihood of meeting the 2 C target: a least-cost pathway and a pathway that postpones ambitious mitigation …	;;Lucas, Paul L.;;Shukla, P. R.;;Chen, Wenying;;van Ruijven, Bas J.;;Dhar, Subash;;den Elzen, Michel G. J.;;van Vuuren, Detlef P.		;;Lucas, PL;;Shukla, PR;;Chen, WY;;van Ruijven, BJ;;Dhar, S;;den Elzen, MGJ;;van Vuuren, DP			1032							Copenhagen pledges; Two degrees; Energy dynamics	10.1016/j.enpol.2013.09.026	Article		paul.lucas@pbl.nl	1041	;;;;		European Commission [226282]	;;The work presented is based on research within the POEM (Policy Options;;to engage EMerging Asian economies in a post-Kyoto regime) project -;;funded by the European Commission's 7th Framework Programme under;;contract 226282 - and is discussed with policy-makers in India and;;China. The authors wish to thank partners of the POEM project and the;;participants in the country workshops for their …	294ZC		;;CONCENTRATION TARGETS; EMISSION ALLOWANCES; CO2 EMISSIONS; LOW-CARBON;;;MODEL; SCENARIOS; MARKAL; STRATEGIES; PATHWAYS		ENERG POLICY	Energy Policy	English		52	;;van Vuuren, Detlef/0000-0003-0398-2831; van Ruijven,;;Bas/0000-0003-1232-5892	THE BOULEVARD, LANGFORD LANE, KIDLINGTON, OXFORD OX5 1GB, OXON, ENGLAND	DEC	10	OXFORD		J	ELSEVIER SCI LTD	2013	van Vuuren, Detlef/A-4764-2009; van Ruijven, Bas/G-8106-2011	Lucas, PL (reprint author), PBL Netherlands Environm Assessment Agcy, POB 1, NL-3720 BA Bilthoven, Netherlands.	Energy & Fuels; Environmental Sciences & Ecology			0301-4215	ENERGY POLICY
A00213	To systematically reveal how domestic trade impacts on China's regional energy uses, an interprovincial input-output modeling is carried out to address demand-derived energy requirements for the regional economies in 2007 based on the recently available data. Both the energy uses embodied in final demand and interregional trade are investigated from the regional and sectoral insights. Significant…	;;Zhang, Bo;;Chen, Z. M.;;Xia, X. H.;;Xu, X. Y.;;Chen, Y. B.		;;Zhang, B;;Chen, ZM;;Xia, XH;;Xu, XY;;Chen, YB			1169							;;Embodied energy account; Multi-regional input-output modeling;;;Interregional trade in China	10.1016/j.enpol.2013.08.062	Article		zhangbo@cumtb.edu.cn; chenzhanming@pku.edu.cn	1181	;;;;		;;Specialized Research Fund for the Doctoral Program of Higher Education;;of China [20120023120002]; Ministry of Education of China [12YJC790255];;;Foundation of State Key Laboratory of Coal Resources and Safe Mining,;;China University of Mining Technology [SKLCRSM11KFA04]; National Natural;;Science Foundation of China [L1222016]	;;This study has been supported by the Specialized Research Fund for the;;Doctoral Program of Higher Education of China (Grant no.;;20120023120002), the Humanities and Social Sciences Fund, Ministry of;;Education of China (Grant no. 12YJC790255), the Foundation of State Key;;Laboratory of Coal Resources and Safe Mining, China University of Mining;;& Technology (Grant no. SKLCRSM11KFA04) and in pa…	294ZC		;;GREENHOUSE-GAS EMISSIONS; GLOBALIZED WORLD-ECONOMY; INTERNATIONAL-TRADE;;;CO2 EMISSIONS; EMBODIMENT ANALYSIS; EMPIRICAL-ANALYSIS; CONSUMPTION;;;REQUIREMENTS; AGGREGATION; FOOTPRINTS		ENERG POLICY	Energy Policy	English		61	Chen, Zhan-Ming/0000-0001-5239-6332	THE BOULEVARD, LANGFORD LANE, KIDLINGTON, OXFORD OX5 1GB, OXON, ENGLAND	DEC	13	OXFORD		J	ELSEVIER SCI LTD	2013	Chen, Zhan-Ming/B-1351-2011	Zhang, B (reprint author), China Univ Min & Technol Beijing, Sch Management, Ctr Resource & Environm Policy Res, Beijing 100083, Peoples R China.	Energy & Fuels; Environmental Sciences & Ecology			0301-4215	ENERGY POLICY
A00214	District heating pricing is a core element in reforming the heating market. Existing district heating pricing methods, such as the cost-plus pricing method and the conventional marginal-cost pricing method, cannot simultaneously provide both high efficiency and sufficient investment cost return. To solve this problem, the paper presents a new pricing model, namely. Equivalent Marginal Cost Pricin…	;;Zhang, Junli;;Ge, Bin;;Xu, Hongsheng		;;Zhang, JL;;Ge, B;;Xu, HS			1224							District heating pricing; Market efficiency; Return on investment	10.1016/j.enpol.2013.09.017	Article		zjli_paper@sina.com	1232	;;;;				294ZC		ENERGY; COGENERATION		ENERG POLICY	Energy Policy	English		23		THE BOULEVARD, LANGFORD LANE, KIDLINGTON, OXFORD OX5 1GB, OXON, ENGLAND	DEC	9	OXFORD		J	ELSEVIER SCI LTD	2013		Zhang, JL (reprint author), Southeast Univ, Sch Energy & Environm, Nanjing 210096, Jiangsu, Peoples R China.	Energy & Fuels; Environmental Sciences & Ecology			0301-4215	ENERGY POLICY
A00215		;;Long, Ying;;Liu, Xingjian		;;Long, Y;;Liu, XJ			2797								10.1068/a130162g	Editorial Material		longying1980@gmail.com; xliu36@uncc.edu	2798	;;;;				296MB			12	ENVIRON PLANN A	Environ. Plan. A	English		4		207 BRONDESBURY PARK, LONDON NW2 5JN, ENGLAND	DEC	2	LONDON		J	PION LTD	2013		Long, Y (reprint author), Beijing Inst City Planning, Beijing, Peoples R China.	Environmental Sciences & Ecology; Geography			0308-518X	ENVIRONMENT AND PLANNING A
A00216	Recently, an information theoretic inspired concept of transfer entropy has been introduced by Schreiber. It aims to quantify in a nonparametric and explicitly nonsymmetric way the flow of information between two time series. This model-free based on Shannon entropy approach in principle allows us to detect statistical dependencies of all types, i.e., linear and nonlinear temporal correlations. H…	;;Wang, Xuejiao;;Shang, Pengjian;;Huang, Jingjing;;Feng, Guochen	1350019	;;Wang, XJ;;Shang, PJ;;Huang, JJ;;Feng, GC										Data discretization; transfer entropy; financial market	10.1142/S0219477513500193	Article		pjshang@bjtu.edu.cn		;;;;		;;funds of the China National Science [61071142]; Beijing National Science;;[4122059]; National High Technology Research Development Program of;;China (863 Program) [2011AA110306]	;;The financial supports from the funds of the China National Science;;(61071142), the Beijing National Science (4122059) and the National High;;Technology Research Development Program of China (863 Program);;(2011AA110306) are gratefully acknowledged.	297DE		INFORMATION-TRANSFER; TIME-SERIES; FLOW	4	FLUCT NOISE LETT	Fluct. Noise Lett.	English		29		5 TOH TUCK LINK, SINGAPORE 596224, SINGAPORE	DEC	15	SINGAPORE		J	WORLD SCIENTIFIC PUBL CO PTE LTD	2013		Shang, PJ (reprint author), Beijing Jiaotong Univ, Sch Sci, Dept Math, Beijing 100044, Peoples R China.	Mathematics; Physics			0219-4775	FLUCTUATION AND NOISE LETTERS
A00217		;;Rupp, Deborah E.;;Skarlicki, Daniel;;Shao, Ruodan		;;Rupp, DE;;Skarlicki, D;;Shao, RD			361								10.1111/iops.12068	Article		ruppd@purdue.edu	+	;;;;				296KJ		;;SELF-DETERMINATION THEORY; ORGANIZATIONAL JUSTICE; MOTIVATION;;;FRAMEWORK; EMPLOYEES; FAIRNESS	4	IND ORGAN PSYCHOL-US	Ind. Organ. Psychol.	English		64		111 RIVER ST, HOBOKEN 07030-5774, NJ USA	DEC	8	HOBOKEN		J	WILEY-BLACKWELL	2013		Rupp, DE (reprint author), Purdue Univ, Dept Psychol Sci, Coll Hlth & Human Sci, 703 Third St, W Lafayette, IN 47907 USA.	Psychology			1754-9426	;;INDUSTRIAL AND ORGANIZATIONAL PSYCHOLOGY-PERSPECTIVES ON SCIENCE AND;;PRACTICE
A00218		;;Bloomgarden, Zachary;;Ning, Guang		;;Bloomgarden, Z;;Ning, G			369								10.1111/1753-0407.12086	Editorial Material		zbloom@gmail.com; guangning@medmail.com.cn	371	;;;;				295NW		INCREASING PREVALENCE; POPULATION; MELLITUS; ADULTS; BURDEN; IMPACT; US	4	J DIABETES	J. Diabetes	English		12		111 RIVER ST, HOBOKEN 07030-5774, NJ USA	DEC	3	HOBOKEN		J	WILEY-BLACKWELL	2013		Bloomgarden, Z (reprint author), Mt Sinai Sch Med, New York, NY 10029 USA.	Endocrinology & Metabolism			1753-0393	JOURNAL OF DIABETES
A00219	This study tested the applicability of the theory of planned behavior (TPB) on gambling intention and involvement in a representative Chinese sample in Macao, recruited by a random residential number dialing method. We successfully interviewed 685 respondents, with about one-third of them reporting that they had participated in gambling activities during the 12 months prior to the interview. The …	;;Wu, Anise M. S.;;Lai, Mark H. C.;;Tong, Kowk Kit;;Tao, Vivienne Y. K.		;;Wu, AMS;;Lai, MHC;;Tong, KK;;Tao, VYK			749							Theory of planned behavior; Gambling; Chinese; Techniques; Superstition	10.1007/s10899-012-9344-7	Article		anisewu@gmail.com; marklhc@gmail.com; kktong@umac.mo; vyktao@umac.mo	763	;;;;				296WQ		;;COLLEGE-STUDENTS; PLANNED BEHAVIOR; SELF-EFFICACY; COGNITIONS; GAMBLERS;;;SCALES	4	J GAMBL STUD	J. Gamb. Stud.	English		35		233 SPRING ST, NEW YORK, NY 10013 USA	DEC	15	NEW YORK		J	SPRINGER	2013		Wu, AMS (reprint author), Univ Macau, Dept Psychol, Fac Social Sci & Humanities FSH, Av Padre Tomas Pereira, Taipa, Peoples R China.	Substance Abuse; Psychology			1050-5350	JOURNAL OF GAMBLING STUDIES
A00220	Traditional users and new users of antidumping are pursuing different paths. Nowadays, the trend of active use of antidumping tools has shifted from the developed countries towards the developing countries. The antidumping measures imposed by emerging economies tend to be more frequent and severe than those imposed by developed countries and South-South protectionism also emerges. Even though eme…	Wei, Dan		Wei, D			921								10.1093/jiel/jgt027	Article		danwei@umac.mo	958	;;;;				296LG		RETALIATION THREATS; TRADE; WTO	4	J INT ECON LAW	J. Int. Econ. Law	English		77		GREAT CLARENDON ST, OXFORD OX2 6DP, ENGLAND	DEC	38	OXFORD		J	OXFORD UNIV PRESS	2013		Wei, D (reprint author), Univ Macau, Inst Adv Legal Studies, Fac Law, Taipa, Peoples R China.	Government & Law			1369-3034	JOURNAL OF INTERNATIONAL ECONOMIC LAW
A00221	The design, construction, and operation of nuclear power plants require human factors engineering review to ensure the safety of the system. As one of the important part of the human factors engineering review, integrated system validation (ISV) is the integrated evaluation of the system under high fidelity simulation condition. It validates whether the design of the integrated system can support…	;;Dong, Xiaolu;;Song, Fei;;Li, Zhizhong;;Zhang, Shuhui		;;Dong, XL;;Song, F;;Li, ZZ;;Zhang, SH			826								10.1016/j.nucengdes.2013.09.020	Article		zzli@tsinghua.edu.cn	832	;;;;		National Natural Science Foundation of China [70931003]	;;This study was supported by the National Natural Science Foundation of;;China (Project No. 70931003).	294ZD		OPERATION; TEAMS		NUCL ENG DES	Nucl. Eng. Des.	English		22		PO BOX 564, 1001 LAUSANNE, SWITZERLAND	DEC	7	LAUSANNE		J	ELSEVIER SCIENCE SA	2013		Li, ZZ (reprint author), Tsinghua Univ, Dept Ind Engn, South 526,Shunde Bldg, Beijing 100084, Peoples R China.	Nuclear Science & Technology			0029-5493	NUCLEAR ENGINEERING AND DESIGN
A00222	;;Background: Some men who have sex with men (MSM) meet and have sex with male partners at gay saunas, the connections between which are little explored for designing HIV prevention measures. This study aims to describe the network configuration of gay saunas and explore its relationship with risk behavior of MSM in the respective sauna communities, in the city of Hong Kong.;;Methods: Using venue…	;;Poon, Chin Man;;Lee, Shui Shan		;;Poon, CM;;Lee, SS			933								10.1097/OLQ.0000000000000052	Article		sslee@cuhk.edu.hk	938	;;;;		Research Grants Council of Hong Kong, China [470110]	;;This study is supported by General Research Fund, No. 470110, from;;Research Grants Council of Hong Kong, China. Data of this manuscript;;were analyzed by different approaches and presented in Eighth UKSNA;;Conference, Bristol, UK, and Seventh IAS Conference on HIV Pathogenesis,;;Treatment and Prevention 2013, Kuala Lumpur, Malaysia.	297GB		;;HIV-INFECTION; AFFILIATION NETWORKS; BATHHOUSE ATTENDEES; PUBLIC-HEALTH;;;RISK; SPREAD; CHINA; CALIFORNIA; EPIDEMIC; BEHAVIOR	12	SEX TRANSM DIS	Sex. Transm. Dis.	English		30	Lee, Shui Shan/0000-0003-1448-765X	530 WALNUT ST, PHILADELPHIA, PA 19106-3621 USA	DEC	6	PHILADELPHIA		J	LIPPINCOTT WILLIAMS & WILKINS	2013	Lee, Shui Shan/B-9374-2008	Lee, SS (reprint author), Prince Wales Hosp, Postgrad Educ Ctr, Room 205, Shatin, Hong Kong, Peoples R China.	Infectious Diseases			0148-5717	SEXUALLY TRANSMITTED DISEASES
A00223	Over the past decade, the topic of spiritual formation has been increasingly discussed in Chinese Protestant churches and courses on Christian spirituality and spiritual formation have been taught in many theological seminaries. In this paper, I suggest an approach to studying traditional Christian spiritual classics. This approach engages the experience, the background and the anthropological fo…	Ng, Annie Y. J. Pan		Ng, AYJP			9							;;spirituality; Ignatius of Loyola; the imitation of Christ; anthropology;;;the spiritual formation		Article		Annie.Ng@cgst.edu	42	;;;;				283SU			16	SINO-CHRIST STUD	Sino-Christ. Stud.	Chinese		35		200 CHUNG PEI RD, CHUNG LI, 32023 ROC, TAIWAN	DEC	34	CHUNG LI		J	CHUNG YUAN CHRISTIAN UNIV	2013		Ng, AYJP (reprint author), China Grad Sch Theol, Kowloon Tong, Hong Kong, Peoples R China.	Religion			1990-2670	SINO-CHRISTIAN STUDIES
A00224	About 120,000-200,000 Chinese laborers worked for Allied troops during WWI. 80% of them were illiterate and they encountered many language barriers and difficulties Some members of the North American YMCA came to Britain and France to help them, especially by teaching them to read. James Yen and his colleagues initiated a new movement to teach the laborers They compiled a new basic Chinese charac…	Zhou Donghua		Zhou, DH			43							YMCA; Anti-illiteracy; James Yen; New-Citizen Chinese laborers in WWI		Article		donghua@pku.org.en	72	;;;;				283SU		WORLD-WAR-I	16	SINO-CHRIST STUD	Sino-Christ. Stud.	Chinese		32		200 CHUNG PEI RD, CHUNG LI, 32023 ROC, TAIWAN	DEC	30	CHUNG LI		J	CHUNG YUAN CHRISTIAN UNIV	2013		Zhou, DH (reprint author), Hangzhou Normal Univ, Dept Hist, Hangzhou, Zhejiang, Peoples R China.	Religion			1990-2670	SINO-CHRISTIAN STUDIES
A00225	Mohist ethic was closer to the Puritan ethic than any other ethic of Hundred Schools. In the same was as the Puritans, Mohists insisted on a form of worldly ascetic ethic in the field of economy. Both groups affirmed the legitimacy of pursuing benefits and collecting money, and highlighted the asceticism of hard work and frugality As Christians, the Puritans believed in God and in the love comman…	Jun, Zhang		Jun, Z			97							Mohist; Puritan; ascetic ethic; economy; rationality		Article		yorckzhang@hotmail.com	130	;;;;				283SU			16	SINO-CHRIST STUD	Sino-Christ. Stud.	Chinese		28		200 CHUNG PEI RD, CHUNG LI, 32023 ROC, TAIWAN	DEC	34	CHUNG LI		J	CHUNG YUAN CHRISTIAN UNIV	2013		Jun, Z (reprint author), Shaanxi Normal Univ, Coll Chinese Language & Literature, Xian, Peoples R China.	Religion			1990-2670	SINO-CHRISTIAN STUDIES
A00226	Contemporary Saint Paul Renaissance, a non-religious reading of Paul in the field of politics and philosophy, presents a political theology image of the alliance of historical materialism and Christian theology marshalled against the new Roman Empire. In traditional Pauline theology, the heart of the theological doctrine lies within the transformation from law to grace through belief in Christ's …	Ge Tibiao		Ge, TB			161							Saint Paul; political theology; subject		Article		getibiao@126.com	182	;;;;				283SU			16	SINO-CHRIST STUD	Sino-Christ. Stud.	Chinese		14		200 CHUNG PEI RD, CHUNG LI, 32023 ROC, TAIWAN	DEC	22	CHUNG LI		J	CHUNG YUAN CHRISTIAN UNIV	2013		Ge, TB (reprint author), Ningbo Univ, Fac Liberal Arts & Commun, Ningbo, Jiangbei, Peoples R China.	Religion			1990-2670	SINO-CHRISTIAN STUDIES
A00227	Spatial models of port system evolution often depict linearly the emergence of hierarchy through successive concentration phases of originally scattered ports. The Chinese case provides a fertile ground for complementing existing works by a long-term perspective, given the early importance of river ports and seaports and the development irregularities caused by periods of closure and openness ove…	;;Wang, Chengjin;;Ducruet, Cesar		;;Wang, CJ;;Ducruet, C			521							China; port system; spatial evolution; transport system	10.1111/tesg.12033	Article		cjwang@igsnrr.ac.cn; cdu@parisgeo.cnrs.fr	538	;;;;				297JO		;;UNITED-STATES; TRANSPORT EXPANSION; SEAPORTS; HUB; COMPETITION;;;EMERGENCE; NETWORK; CITIES; DELTA	5	TIJDSCHR ECON SOC GE	Tijdschr. Econ. Soc. Geogr.	English		118		111 RIVER ST, HOBOKEN 07030-5774, NJ USA	DEC	18	HOBOKEN		J	WILEY-BLACKWELL	2013		Ducruet, C (reprint author), French Natl Ctr Sci Res CNRS, UMR Geog Cites 8504, F-75006 Paris, France.	Business & Economics; Geography			0040-747X	TIJDSCHRIFT VOOR ECONOMISCHE EN SOCIALE GEOGRAFIE
A00228	Exploring the links between urban sprawl and social segregation is an important theme in urban research. Although many studies are available, conclusions are still mixed. This paper contributes to our existing understanding of the impact of sprawl on social segregation, looking at the case of Beijing. The results of the analysis show that sprawling development, characterised by scattered gated co…	Zhao, Pengjun		Zhao, PJ			571							Social segregation; urban sprawl; spatial planning; Beijing	10.1111/tesg.12030	Article		pengjun.zhao@pku.edu.cn	587	;;;;				297JO		;;GATED COMMUNITIES; LOS-ANGELES; CHINA; REFORM; DECENTRALIZATION;;;DIMENSIONS; EXCLUSION; MIGRATION; POVERTY; ATHENS	5	TIJDSCHR ECON SOC GE	Tijdschr. Econ. Soc. Geogr.	English		76		111 RIVER ST, HOBOKEN 07030-5774, NJ USA	DEC	17	HOBOKEN		J	WILEY-BLACKWELL	2013		Zhao, PJ (reprint author), Peking Univ, Coll Urban & Environm Sci, Dept Urban & Reg Planning, Beijing 100871, Peoples R China.	Business & Economics; Geography			0040-747X	TIJDSCHRIFT VOOR ECONOMISCHE EN SOCIALE GEOGRAFIE
A00229	This paper discusses the sociolinguistic background to the use of English in higher education in Macau by presenting the results of a sociolinguistic survey on the use of English in a privately-owned university in the special administrative region of Macau. A survey of language use and attitudes was administered to 26 teaching staff and 227 undergraduate students at the university in mid-2012. Th…	Botha, Werner		Botha, W			461								10.1111/weng.12053	Article		wrbotha@gmail.com	475	;;;;				296KL		MAINLAND CHINESE STUDENTS; HONG-KONG	4	WORLD ENGLISH	World Englishes	English		31		111 RIVER ST, HOBOKEN 07030-5774, NJ USA	DEC	15	HOBOKEN		J	WILEY-BLACKWELL	2013		Botha, W (reprint author), Macau Univ Sci & Technol, Dept Gen Educ, Ave Wai Long, Taipa, Macau, Peoples R China.	Linguistics		SI	0883-2919	WORLD ENGLISHES
A00230	The market for global business process outsourcing (BPO) is predicted to triple in size by 2020 (NASSCOM ). Such explosive growth has had and will continue to have huge economic benefits for Asia. The benefits are clearly manifest in India and the Philippines, who are both leading offshore outsourcing (O&O) destinations for the BPO industry. In India, this development has resulted in an initiativ…	Forey, Gail		Forey, G			503								10.1111/weng.12058	Article		gail.forey@polyu.edu.hk	520	;;;;				296KL		GLOBALIZATION; SERVICE; ENGLISH; GENDER	4	WORLD ENGLISH	World Englishes	English		53		111 RIVER ST, HOBOKEN 07030-5774, NJ USA	DEC	18	HOBOKEN		J	WILEY-BLACKWELL	2013		Forey, G (reprint author), Hong Kong Polytech Univ, Dept English, Hung Hom Kowloon, Hong Kong, Peoples R China.	Linguistics		SI	0883-2919	WORLD ENGLISHES
A00231	With the rapid development of telecommunications and the business processing outsourcing (BPO) industry, many companies are establishing call centres for customer service in developing countries, where English is the major language used in the industry but often not spoken as the first language. While there is an abundance of research on call centre communication from the perspectives of business…	;;Lam, Marvin;;Yu, Carol		;;Lam, M;;Yu, C			521								10.1111/weng.12059	Article		marvin.lam@polyu.edu.hk; yucarol@gmail.com	535	;;;;				296KL		COMMUNICATION; LABOR; CARE	4	WORLD ENGLISH	World Englishes	English		66		111 RIVER ST, HOBOKEN 07030-5774, NJ USA	DEC	15	HOBOKEN		J	WILEY-BLACKWELL	2013		Lam, M (reprint author), Hong Kong Polytech Univ, Dept English, Hong Kong, Hong Kong, Peoples R China.	Linguistics		SI	0883-2919	WORLD ENGLISHES
A00232	The data for this study was gathered from a US multinational company information technology enabled services (ITES) worksite offshored to India. The focus of the study is the exploration of the nature of English communication between professional support engineers across Inner, Outer and Expanding Circles,' and in particular the use of accommodation strategies used by the support engineers in the…	Lockwood, Jane		Lockwood, J			536								10.1111/weng.12060	Article		lockwood@cityu.edu.hk	550	;;;;				296KL		LINGUA-FRANCA; WORLD ENGLISHES; BUSINESS; INDUSTRY	4	WORLD ENGLISH	World Englishes	English		35		111 RIVER ST, HOBOKEN 07030-5774, NJ USA	DEC	15	HOBOKEN		J	WILEY-BLACKWELL	2013		Lockwood, J (reprint author), City Univ Hong Kong, Dept English, Tat Chee Ave, Kowloon Tong, Hong Kong, Peoples R China.	Linguistics		SI	0883-2919	WORLD ENGLISHES
A00233		;;Wei, Rining;;Feng, Jieyun		;;Wei, RN;;Feng, JY			558								10.1111/weng.12064	Book Review		tonydingdang@hotmail.com; fengjieyun88@126.com	561	;;;;				296KL			4	WORLD ENGLISH	World Englishes	English		4		111 RIVER ST, HOBOKEN 07030-5774, NJ USA	DEC	4	HOBOKEN		J	WILEY-BLACKWELL	2013		Wei, RN (reprint author), Hong Kong Polytech Univ, Dept Chinese & Bilingual Studies, 11 Yuk Choi Rd, Kowloon, Hong Kong, Peoples R China.	Linguistics		SI	0883-2919	WORLD ENGLISHES
A00234	Here we edit a second leaf of an Old Uigur manuscript preserved in the Chinese Academy of Cultural Heritage. While the leaf published in 2011 is an account of the history of the West Uigur Kingdom of Qoco, the present text refers to the early years of Buddhism as well as to the relationship between religion and state, the inner and outer sphere in Old Uigur historiography. We consider the possibi…	;;Zhang Tieshan;;Zieme, Peter		;;Zhang, TS;;Zieme, P			397							;;Old Uigur historiography; early Buddhism after Buddha (Ananda,;;Ajatasatru, Asoka); relationship between religion and state	10.1556/AOrient.66.2013.4.2	Article		Zhangtieshan@sina.com; ziemepet@gmail.com	410	;;;;				291UL			4	ACTA ORIENT	Acta Orient.	English		16		PRIELLE K U 19, PO BOX 245,, H-1117 BUDAPEST, HUNGARY	DEC	14	BUDAPEST		J	AKADEMIAI KIADO RT	2013		Zhang, TS (reprint author), Minzu Univ China, Inst Minor Languages & Literatures, 27 Zhongguancun South Ave, Beijing 100081, Peoples R China.	History; Asian Studies			1588-2667	ACTA ORIENTALIA
A00235	;;Objectives. The present study was undertaken to evaluate the long-term health-related quality of life (HRQOL) as well as the employment status in survivors of severe sepsis up to 6 years afterwards.;;Material and methods. From January 2003 to December 2008 a total of 112 severe sepsis and 112 age, gender and Charlson comorbidity index-matched non-septic critically ill patients from 4 university…	;;Zhang, K.;;Mao, X.;;Fang, Q.;;Jin, Y.;;Cheng, B.;;Xie, G.;;Li, H.;;Yu, L.;;Zhu, T.;;Wang, H.;;Liu, X.;;Zhang, Y.;;Jin, Y.;;Zhang, N.;;Lou, T.;;Fang, X. M.		;;Zhang, K;;Mao, X;;Fang, Q;;Jin, Y;;Cheng, B;;Xie, G;;Li, H;;Yu, L;;Zhu, T;;Wang, H;;Liu, X;;Zhang, Y;;Jin, Y;;Zhang, N;;Lou, T;;Fang, XM			995							;;Employment status; Critically ill; Follow up studies; Questionnaire;;;Matched case control study	10.1007/s00101-013-2257-8	Article		xiangming_fang@163.com	1002	;;;;		;;National Science Fund for Distinguished Young Scholars from National;;Natural Science Foundation of China [30825037]; Changjiang Scholar;;Program of China, Zhejiang Provincial Program for the Cultivation of;;High-level Innovative Health Talents; Research Project of Education;;Bureau of Zhejiang Province [Y200908925, Y200909678]	;;This research was supported by the National Science Fund for;;Distinguished Young Scholars from National Natural Science Foundation of;;China (30825037), Changjiang Scholar Program of China, Zhejiang;;Provincial Program for the Cultivation of High-level Innovative Health;;Talents and the Research Project of Education Bureau of Zhejiang;;Province (Y200908925, Y200909678).	293TB		;;RESPIRATORY-DISTRESS-SYNDROME; INTENSIVE-CARE-UNIT; FOLLOW-UP; CRITICAL;;ILLNESS; HEALTH SURVEY; SEPTIC SHOCK; MORTALITY; IMPACT; EPIDEMIOLOGY;;;DEFINITIONS	12	ANAESTHESIST	Anaesthesist	English		32		233 SPRING ST, NEW YORK, NY 10013 USA	DEC	8	NEW YORK		J	SPRINGER	2013		Fang, XM (reprint author), Zhejiang Univ, Affiliated Hosp 1, Sch Med, Dept Anesthesiol, QingChun Rd 79, Hangzhou 310003, Zhejiang, Peoples R China.	Anesthesiology			0003-2417	ANAESTHESIST
A00236	Land suitability evaluation (LSE) is an important step in land-use planning. Using multi-criteria decision-making (MCDM) techniques based on geographic information systems is a flexible and effective approach for this evaluation process. Implementation of sensitivity analysis to validate and calibrate the MCDM can enhance the understanding of the LSE results and assist in making informed planning…	;;Xu, Erqi;;Zhang, Hongqi		;;Xu, EQ;;Zhang, HQ			1							;;Land suitability evaluation; Multi-criteria decision-making;;;One-dimensional sensitivity; Spatially explicit analysis; Earth mover's;;distance	10.1016/j.apgeog.2013.08.005	Article		zhanghq@igsnrr.ac.cn	9	;;;;				292DP		;;UNCERTAINTY ANALYSIS; DECISION-MAKING; GIS; MULTICRITERIA; MANAGEMENT;;;MODEL; VISUALIZATION; FRAMEWORK; DISTANCE; IMPACT		APPL GEOGR	Appl. Geogr.	English		58		THE BOULEVARD, LANGFORD LANE, KIDLINGTON, OXFORD OX5 1GB, OXON, ENGLAND	DEC	9	OXFORD		J	ELSEVIER SCI LTD	2013		Zhang, HQ (reprint author), Chinese Acad Sci, Inst Geog Sci & Nat Resources Res, Beijing 100101, Peoples R China.	Geography			0143-6228	APPLIED GEOGRAPHY
A00237	Land-cover change has significant impacts on regional carbon dynamics. Understanding the carbon consequences of land-cover change is necessary for decision makers to address the issues of carbon reduction and climate change mitigation. Optical remote sensing images have been widely used for detecting regional land-cover change. However, it is difficult to acquire desirable images for regions that…	;;Chen, Yimin;;Li, Xia;;Liu, Xiaoping;;Ai, Bin		;;Chen, YM;;Li, X;;Liu, XP;;Ai, B			10							Mixed-label analysis; Land-cover change; Carbon budget; MODIS; Landsat	10.1016/j.apgeog.2013.08.002	Article		gp04chym@mail2.sysu.edu.cn; lixia@mail.sysu.edu.cn	21	;;;;				292DP		;;PEARL RIVER DELTA; URBAN LAND; CHINA; REFLECTANCE; EMISSIONS; ECOSYSTEM;;;GROWTH; MODEL; SINKS; STATE		APPL GEOGR	Appl. Geogr.	English		47		THE BOULEVARD, LANGFORD LANE, KIDLINGTON, OXFORD OX5 1GB, OXON, ENGLAND	DEC	12	OXFORD		J	ELSEVIER SCI LTD	2013	Chen, Yimin/H-1565-2011	Li, X (reprint author), Sun Yat Sen Univ, Sch Geog & Planning, 135 West Xingang RD, Guangzhou 510275, Guangdong, Peoples R China.	Geography			0143-6228	APPLIED GEOGRAPHY
A00238	Analyzing the spatial determinants of urban growth is helpful for urban planning and management. In a case study of urban agglomeration around Hangzhou Bay (China), four landscape metrics (total area, total edge, landscape shape index and aggregation index) were used to describe the landscape characteristics of the urban growth at two block scales (4 km and 7 km) during two temporal intervals (19…	;;Zhang, Zhonghao;;Su, Shiliang;;Xiao, Rui;;Jiang, Diwei;;Wu, Jiaping		;;Zhang, ZH;;Su, SL;;Xiao, R;;Jiang, DW;;Wu, JP			193							;;Urban growth pattern; Landscape metrics; Geographic determinants;;;Spatial regression; Scale effects	10.1016/j.apgeog.2013.09.013	Article		;;zzh8705@163.com; shliangsu@163.com; xr_2003@163.com;;;smile-jiang2008@163.com; jw67@zju.edu.cn	202	;;;;				292DP		;;LAND-USE CHANGE; HUMAN SETTLEMENT-PATTERNS; LANDSCAPE PATTERN; SPATIAL;;DYNAMICS; DRIVING FORCES; TM IMAGES; EXPANSION; MODELS; METRICS; SCALE		APPL GEOGR	Appl. Geogr.	English		55		THE BOULEVARD, LANGFORD LANE, KIDLINGTON, OXFORD OX5 1GB, OXON, ENGLAND	DEC	10	OXFORD		J	ELSEVIER SCI LTD	2013		Wu, JP (reprint author), Zhejiang Univ, Ocean Coll, 866 Yuhangtang Rd, Hangzhou 310058, Zhejiang, Peoples R China.	Geography			0143-6228	APPLIED GEOGRAPHY
A00239	Shanghai is a megacity that increasingly relies on water drawn from the Yangtze River estuary. During periods of low flow, water in the estuary can become too saline for use in city water supplies. River flow is measured at the Datong gauging station 680 km upstream from the river mouth. Several existing and planned river water extractions are located below Datong, including the Eastern Route of …	;;Chen, Dan;;Webber, Michael;;Finlayson, Brian;;Barnett, Jon;;Chen, Zhongyuan;;Wang, Mark		;;Chen, D;;Webber, M;;Finlayson, B;;Barnett, J;;Chen, ZY;;Wang, M			303							;;Shanghai water supply; Lower Yangtze River; South-North Water Diversion;;Project	10.1016/j.apgeog.2013.09.025	Article		brianlf@unimelb.edu.au	310	;;;;				292DP		DRY SEASON; CHINA; DISCHARGE; BASIN; PRECIPITATION; ESTUARY		APPL GEOGR	Appl. Geogr.	English		38		THE BOULEVARD, LANGFORD LANE, KIDLINGTON, OXFORD OX5 1GB, OXON, ENGLAND	DEC	8	OXFORD		J	ELSEVIER SCI LTD	2013		Finlayson, B (reprint author), Univ Melbourne, Dept Resource Management & Geog, Melbourne, Vic 3010, Australia.	Geography			0143-6228	APPLIED GEOGRAPHY
A00240	Major depressive disorder is prevalent worldwide, and only about half of those affected will experience no further episodes or symptoms. Additionally, depressive symptoms can be challenging to identify, with many patients going undiagnosed despite a wide variety of available treatment options. Antidepressants are the cornerstone of depression treatment; however, a large number of factors must be …	;;Treuer, Tamas;;Liu, Chia-Yih;;Salazar, Gerardo;;Kongsakon, Ronnachai;;Jia, Fujun;;Habil, Hussain;;Lee, Min-Soo;;Lowry, Amanda;;Duenas, Hector		;;Treuer, T;;Liu, CY;;Salazar, G;;Kongsakon, R;;Jia, FJ;;Habil, H;;Lee, MS;;Lowry, A;;Duenas, H			219							antidepressive agent; Asia; depressive disorder; duloxetine; guideline	10.1111/appy.12090	Review		treuert@lilly.com	230	;;;;		Eli Lilly; Servier; Sanofi; Janssen; Lunbeck; Otsuka; Wyeth	;;Hector Duenas and Tamas Treuer are full time employees of, and;;shareholders in, Eli Lilly. Amanda Lowry is a full time employee of Eli;;Lilly. Gerardo Carmelo B. Salazar serves on the Eli Lilly advisory board;;for duloxetine and on advisory boards of AstraZeneca, Lunbeck, Novartis,;;and Torrent Pharma, and as a speaker for Abbott, GSK, Mundipharma,;;Multicare, Pfizer, and Servier. Hussain Habi…	291AM		;;DOUBLE-BLIND; DISORDER; PREVENTION; DULOXETINE; MANAGEMENT; PREDICTORS;;;REMISSION; RELAPSE; KOREA	4	ASIA-PAC PSYCHIAT	Asia-Pac. Psychiatry	English		39		111 RIVER ST, HOBOKEN 07030-5774, NJ USA	DEC	12	HOBOKEN		J	WILEY-BLACKWELL	2013	HABIL, MOHAMAD HUSSAIN/B-9018-2010	Treuer, T (reprint author), Eli Lilly & Co, Neurosci Res, Madach Imre U 13-14, H-1075 Budapest, Hungary.	Psychiatry			1758-5864	ASIA-PACIFIC PSYCHIATRY
A00241	;;IntroductionThe objective of this study was to investigate the clinical features of depression in Asian patients.;;MethodsIt was a cross-sectional, observational study of depression in China, Korea, Malaysia, Singapore, Taiwan, and Thailand. Participants were drug-free outpatients with depressed mood and/or anhedonia. Symptoms and clinical features were assessed using the Montgomery-Asberg Depr…	;;Srisurapanont, Manit;;Hong, Jin Pyo;;Si Tian-mei;;Hatim, Ahmad;;Liu, Chia-Yih;;Udomratn, Pichet;;Bae, Jae Nam;;Fang, Yiru;;Chua, Hong Choon;;Liu, Shen-Ing;;George, Tom;;Bautista, Dianne;;Chan, Edwin;;Rush, A. John		;;Srisurapanont, M;;Hong, JP;;Si, TM;;Hatim, A;;Liu, CY;;Udomratn, P;;Bae, JN;;Fang, YR;;Chua, HC;;Liu, SI;;George, T;;Bautista, D;;Chan, E;;Rush, AJ			259		MD RAN					Asian; depression; health status; social support; symptom	10.1111/appy.12104	Article		manit.s@cmu.ac.th	267	;;;;		;;Lundbeck A/S; Duke-National University of Singapore Office of Clinical;;Research; AstraZeneca; GlaxoSmithKline; Pfizer; Janssen-Cilag; Johnson;;Johnson; Lundbeck; Sanofi-Aventis; Servier	;;This study was supported by unrestricted research grants from Lundbeck;;A/S and the Duke-National University of Singapore Office of Clinical;;Research. The funders had no role in study design, data collection and;;analysis, or decision to submit the manuscript for publication.;;Statistical analysis was provided by the Singapore Clinical Research;;Institute. Technical assistance in data manageme…	291AM		;;DSM-IV; MENTAL-HEALTH; SCALE; ANXIETY; EXPERIENCES; PREVALENCE;;;INTERVIEW; SEVERITY; DISORDER; QUALITY	4	ASIA-PAC PSYCHIAT	Asia-Pac. Psychiatry	English		30		111 RIVER ST, HOBOKEN 07030-5774, NJ USA	DEC	9	HOBOKEN		J	WILEY-BLACKWELL	2013	SULAIMAN, AHMAD HATIM/B-8156-2010	Srisurapanont, M (reprint author), Chiang Mai Univ, Fac Med, Dept Psychiat, Chiang Mai 50200, Thailand.	Psychiatry			1758-5864	ASIA-PACIFIC PSYCHIATRY
A00242	;;IntroductionThis study examined the validity and reliability of the Patient Health Questionnaire-9 (PHQ-9) and Patient Health Questionnaire-2 (PHQ-2). The optimal cutoff score when screening for depression among Chinese college students was also determined.;;MethodsA total of 959 participants completed the PHQ-9 and the Beck Depression Inventory (BDI) questionnaire. The Structured Clinical Inte…	;;Zhang, Ying-Li;;Liang, Wei;;Chen, Zuo-Ming;;Zhang, Hong-Mei;;Zhang, Jian-Hong;;Weng, Xiao-Qin;;Yang, Shi-Chang;;Zhang, Lei;;Shen, Li-Juan;;Zhang, Ya-Lin		;;Zhang, YL;;Liang, W;;Chen, ZM;;Zhang, HM;;Zhang, JH;;Weng, XQ;;Yang, SC;;Zhang, L;;Shen, LJ;;Zhang, YL			268							college student; depression; PHQ-2; PHQ-9; screening	10.1111/appy.12103	Article		yalinzhangcn@163.com	275	;;;;		;;Key Projects of Science and Technology Research of Department of;;Education in Henan [13A320869]; Henan Health Science and Technology;;Innovation Talent Project [4173]	;;The authors would like to thank to Li Hu (PhD in Second Xiangya;;Hospital, Central South University), Leiyin Chen (resident), Maihui;;Chang (undergraduate), Jing Yuan (resident), and Lijuan Sun (attending;;physician) for devoting themselves in data analysis, recruitment of;;participants, and management. All of them work in the Department of;;Psychiatry, the Second Affiliated Hospital of Xinxian…	291AM		;;PRIMARY-CARE; GENDER-DIFFERENCES; MAJOR DEPRESSION; GENERAL-PRACTICE;;;SELF-INJURY; BDI-II; PHQ-9; SEVERITY; POPULATION; PREVALENCE	4	ASIA-PAC PSYCHIAT	Asia-Pac. Psychiatry	English		40		111 RIVER ST, HOBOKEN 07030-5774, NJ USA	DEC	8	HOBOKEN		J	WILEY-BLACKWELL	2013		Zhang, YL (reprint author), Cent S Univ, Xiangya Hosp 2, Mental Hlth Inst, 139 Renmin Middle Rd, Changsha 410011, Hunan, Peoples R China.	Psychiatry			1758-5864	ASIA-PACIFIC PSYCHIATRY
A00243	;;IntroductionPatients suffering from major depressive disorder (MDD) have been reported to have substantial long-lasting limitations in multiple domains of health-related quality of life (HRQoL). The thoughtful assessment of HRQoL and the impact of treatment response on HRQoL are emerging as important issues in the care of patients with major depressive disorder.;;MethodsOne hundred and three pa…	;;Cao, Yuping;;Li, Wen;;Shen, Jingjin;;Malison, Robert T.;;Zhang, Yalin;;Luo, Xingguang		;;Cao, YP;;Li, W;;Shen, JJ;;Malison, RT;;Zhang, YL;;Luo, XG			276							;;Chinese; correlation; health-related quality of life; major depressive;;disorder; symptom severity	10.1111/appy.12059	Article		zhangyl69@vip.sina.com	283	;;;;		Nature Science Foundation in China	;;This work was supported by Nature Science Foundation in China. We thank;;all clinicians and nurses in Second Xiangya Hospital in assisting in the;;research work and thank for Dr Daniel K. Winstead's helpful comments.;;This work is secondary to a previous study by Cao etal. Zhong Nan Da Xue;;Xue Bao Yi Xue Ban. 2011; 36:143-8 (in Chinese).	291AM		;;PRIMARY-CARE; GLOBAL BURDEN; DISABILITY; OUTCOMES; ANTIDEPRESSANTS;;;ANXIETY; MANAGEMENT; MORTALITY; MIGRAINE; DISEASE	4	ASIA-PAC PSYCHIAT	Asia-Pac. Psychiatry	English		34		111 RIVER ST, HOBOKEN 07030-5774, NJ USA	DEC	8	HOBOKEN		J	WILEY-BLACKWELL	2013		Zhang, YL (reprint author), Cent S Univ, Xiangya Hosp 2, Mental Hlth Inst, Changsha 410011, Hunan, Peoples R China.	Psychiatry			1758-5864	ASIA-PACIFIC PSYCHIATRY
A00244	;;IntroductionAs the world's fastest growing addiction, Internet addiction is still controversial. The present study aimed to examine the potential personality predictors of Internet addicts.;;MethodsEight hundred and sixty-eight students were tested using the Eysenck Personality Questionnaire after they had just entered university. Two years later, 49 were found to be addicted to the Internet as…	;;Dong, Guangheng;;Wang, Jiangyang;;Yang, Xuelong;;Zhou, Hui		;;Dong, GH;;Wang, JY;;Yang, XL;;Zhou, H			316							Internet addiction; Iongitudinal study; personality	10.1111/j.1758-5872.2012.00185.x	Article		dongguangheng@zjnu.edu.cn	321	;;;;		National Science Foundation of China [30900405]	;;This research was supported by National Science Foundation of China;;(30900405).	291AM		COLLEGE-STUDENTS; ADOLESCENTS; PREDICTORS; SHYNESS; ONLINE; TAIWAN	4	ASIA-PAC PSYCHIAT	Asia-Pac. Psychiatry	English		33		111 RIVER ST, HOBOKEN 07030-5774, NJ USA	DEC	6	HOBOKEN		J	WILEY-BLACKWELL	2013		Dong, GH (reprint author), Zhejiang Normal Univ, Dept Psychol, 688 Yingbin Rd, Jinhua 321004, Zhejiang, Peoples R China.	Psychiatry			1758-5864	ASIA-PACIFIC PSYCHIATRY
A00245	;;IntroductionThis study aimed to validate and culturally adapt the Perception of Care (PoC) for patients receiving acute psychiatric inpatient services in Hong Kong.;;MethodsThe PoC was translated and culturally adapted into a written Chinese version (C-PoC). Subjects completed C-PoC, Chinese version of Admission Experience Survey (C-AES) and World Health Organization Quality of Life Measure (WH…	;;Fu, Chi-Kin Jackie;;Chow, Po-Ling Paulina;;Lam, Wai-Sum Joanna;;Tung, Chi-Kwong;;Cheung, Yue-Lok Francis		;;Fu, CKJ;;Chow, PLP;;Lam, WSJ;;Tung, CK;;Cheung, YLF			322							institutionalization; psychometrics; satisfaction; validation study	10.1111/appy.12012	Article		jackiefu@alumni.cuhk.net	330	;;;;				291AM		;;QUALITY-OF-LIFE; RATING-SCALE; CONSUMER SATISFACTION; PATIENT;;SATISFACTION; SCHIZOPHRENIA; DEPRESSION; ADMISSION; SERVICES; COERCION;;;IMPACT	4	ASIA-PAC PSYCHIAT	Asia-Pac. Psychiatry	English		31		111 RIVER ST, HOBOKEN 07030-5774, NJ USA	DEC	9	HOBOKEN		J	WILEY-BLACKWELL	2013		Fu, CKJ (reprint author), Castle Peak Hosp, 15 Tsing Chung Koon Rd, Tuen Mun, Hong Kong, Peoples R China.	Psychiatry			1758-5864	ASIA-PACIFIC PSYCHIATRY
A00246	;;IntroductionEstrogen plays essential roles in the regulation of food intake, adiposity, and body weight control. The estrogen alpha receptor, encoded by estrogen receptor 1 gene (ESR1), has been implicated with anorexia nervosa (AN). A previous study indicated that the rs2295193 polymorphism in ESR1 may confer a genetic susceptibility to AN.;;MethodsIn a case-control study, we assessed 195 AN p…	;;Zhang, Chen;;Chen, Jue;;Jia, Xiuzhen;;Yu, Shunying;;Jiang, Wenhui;;Zhang, Ran;;Yuan, Aihua;;Qian, Yiping;;Fan, Juan;;Zhang, Mingdao;;Fang, Yiru;;Xiao, Zeping		;;Zhang, C;;Chen, J;;Jia, XZ;;Yu, SY;;Jiang, WH;;Zhang, R;;Yuan, AH;;Qian, YP;;Fan, J;;Zhang, MD;;Fang, YR;;Xiao, ZP			331							;;anorexia nervosa; association; estrogen receptor 1 gene; meta-analysis;;;polymorphism	10.1111/appy.12100	Article		chenjue2088@163.com; xiaozeping@gmail.com	335	;;;;		;;National Natural Science Foundation of China [81201055]; National Key;;Clinical Disciplines at Shanghai Mental Health Center [OMA-MH2011-873]	;;We are deeply grateful to all participants. We thank these two reviewers;;for their insightful comments. This work was supported by the National;;Natural Science Foundation of China (81201055 to JC) and the National;;Key Clinical Disciplines at Shanghai Mental Health Center;;(OMA-MH2011-873 to YF). There is no conflict of interest.	291AM		;;POPULATION-BASED TWIN; ENVIRONMENTAL-INFLUENCES; ASSOCIATION;;;SUSCEPTIBILITY; SCHIZOPHRENIA; DISORDERS; SAMPLE; FOOD; MICE; ESR1	4	ASIA-PAC PSYCHIAT	Asia-Pac. Psychiatry	English		24		111 RIVER ST, HOBOKEN 07030-5774, NJ USA	DEC	5	HOBOKEN		J	WILEY-BLACKWELL	2013		Chen, J (reprint author), Shanghai Jiao Tong Univ, Sch Med, Shanghai Mental Hlth Ctr, 600 Wan Ping Nan Rd, Shanghai 200030, Peoples R China.	Psychiatry			1758-5864	ASIA-PACIFIC PSYCHIATRY
A00247	Affect is a key factor for both repressive defensiveness and dream experiences, and repression is only one of the functions of the superego. Most previous studies, however, have not factored both trait and state affect into the effect of repression on dreaming. Nor have they investigated superego functioning as a personality dimension. Therefore, this study tested the structural relations between…	Yu, Calvin Kai-Ching		Yu, CKC			266							;;defensiveness; repressors; state affect; structural equation modeling;;;trait affect	10.1037/a0034019	Article		calvinkcyu@ymail.com	276	;;;;				291RG		;;SOCIAL DESIRABILITY; SENSITIZATION SCALE; INTENSITY SCALE; TYPICAL;;DREAMS; COPING STYLES; DISSOCIATION; RECALL; PERSONALITY; MECHANISMS;;;CONVERSION	4	DREAMING	Dreaming	English		40		750 FIRST ST, NE, WASHINGTON, DC 20002-4242 USA	DEC	11	WASHINGTON		J	EDUCATIONAL PUBLISHING FOUNDATION-AMERICAN PSYCHOLOGICAL ASSOC	2013		Yu, CKC (reprint author), Hong Kong Shue Yan Univ, Dept Counselling & Psychol, 10 Wai Tsui Crescent,Braemar Hill Rd, North Point, Hong Kong, Peoples R China.	Psychology			1053-0797	DREAMING
A00248	Susan Stewart is the Avalon Foundation University Professor of the Humanities and Director of the Society of Fellows in the Liberal Arts at Princeton University, USA. She is fellow of the American Academy of Arts and Sciences, a former MacArthur Fellow, and a former Chancellor of the Academy of American Poets. Her most recent books are The Poet's Freedom: A Notebook on Making (2011), Poetry and t…	Shi Huifeng		Shi, HF			1							Susan Stewart; poet; poetry; poetics; the senses		Editorial Material		smithwind@hotmail.com	7	;;;;				292IR			6	FOREIGN LIT STUD	Foreign Lit. Stud.	English		2		152 LUOYU RD, WUHAN, 430079, PEOPLES R CHINA	DEC	7	WUHAN		J	CENTRAL CHINA NORMAL UNIV	2013		Shi, HF (reprint author), Univ Sci & Technol Suzhou, Sch Foreign Languages, Suzhou 215009, Peoples R China.	Literature			1003-7519	FOREIGN LITERATURE STUDIES
A00249	Text refers to the original words or symbols that convey meaning in certain forms. As such, text is composed of communicable words or symbols and the carrier that could store and display words or symbols. While the carrier is the form in which text exists, words and symbols are the spring of a text's meaning. Only when these two elements are complete, it is possible for a text to come into being.…	Nie Zhenzhao		Nie, ZZ			8							;;Ethical Literary Criticism; brain text; materialized text; electronic;;(digital) text; oral literature; written literature		Article		niezhenzhao@163.com	15	;;;;				292IR			6	FOREIGN LIT STUD	Foreign Lit. Stud.	Chinese		4		152 LUOYU RD, WUHAN, 430079, PEOPLES R CHINA	DEC	8	WUHAN		J	CENTRAL CHINA NORMAL UNIV	2013		Nie, ZZ (reprint author), Cent China Normal Univ, Coll Humanities, Wuhan 430079, Peoples R China.	Literature			1003-7519	FOREIGN LITERATURE STUDIES
A00250	As a critical theory and approach American ethical criticism goes through ups and downs, and revival and redevelopment. Before the 1980s, American ethical criticism witnessed the prosperity of ethical studies of literature, but then declined because of the change of research focus in literary theory and their own limitations. With the ethical turn coming back in studies of literature and philosop…	Yang Gexin		Yang, GX			16							;;ethical turn; ethical criticism; Wayne Booth; Martha Nussbaum; Hillis;;Miller		Article		yanggexin9388@163.com	33	;;;;				292IR			6	FOREIGN LIT STUD	Foreign Lit. Stud.	Chinese		7		152 LUOYU RD, WUHAN, 430079, PEOPLES R CHINA	DEC	18	WUHAN		J	CENTRAL CHINA NORMAL UNIV	2013		Yang, GX (reprint author), Huazhong Agr Univ, Coll Foreign Languages, Wuhan 430070, Peoples R China.	Literature			1003-7519	FOREIGN LITERATURE STUDIES
A00251	The 19th century Russian novels are more of the self-realization of authors' subjectivity than just objective reflections of the social life of that era. Associated with the authors' own world views and subjective consciousness, this kind of creative subjectivity consistently overcomes and transcends the limitations of subjective consciousness. Actively revealing objective realities, the authors …	Jie, Zhang		Jie, Z			80							19th century Russian literature; novel creation; subjectivity		Article		z-jie1016@hotmail.com	86	;;;;				292IR			6	FOREIGN LIT STUD	Foreign Lit. Stud.	Chinese		12		152 LUOYU RD, WUHAN, 430079, PEOPLES R CHINA	DEC	7	WUHAN		J	CENTRAL CHINA NORMAL UNIV	2013		Jie, Z (reprint author), Nanjing Normal Univ, Sch Foreign Languages & Cultures, Nanjing 210097, Jiangsu, Peoples R China.	Literature			1003-7519	FOREIGN LITERATURE STUDIES
A00252	The Red Wheel was regarded by Solzhenitsyn as the most important work in his life. He made lots of changes to the novel's theme, structure, narrative emphasis and central figures in its long creating process. These changes clearly reveal how he turned to be a critic of political radicalism from a firm believer in revolutionary theories, and then proceeded to trace the spiritual confusion behind t…	Long Yucheng		Long, YC			87							;;A. Solzhenitsyn; The Red Wheel; Russian revolution; development of;;thought		Article		pkusquirrel@163.com	94	;;;;				292IR			6	FOREIGN LIT STUD	Foreign Lit. Stud.	Chinese		14		152 LUOYU RD, WUHAN, 430079, PEOPLES R CHINA	DEC	8	WUHAN		J	CENTRAL CHINA NORMAL UNIV	2013		Long, YC (reprint author), Zhejiang Univ, Inst World Literature & Comparat Literature, Hangzhou 310028, Peoples R China.	Literature			1003-7519	FOREIGN LITERATURE STUDIES
A00253	The Chinese china represented in the eighteenth-century English poetry is the focus of both men and women's aesthetic appreciation and desire. Men reduce women to the object of their aesthetic appreciation and desire by drawing an analogy between china and women and by objectifying women into china, whereas women, by means of requesting, seeing and consuming china, foreground their subjectivity a…	;;Ren Xiaojin;;Hon Tiejun		;;Ren, XJ;;Hon, TJ			95							;;eighteenth-century English poetry; Chinese china; focus of both men and;;women's aesthetic appreciation and desire		Article		rxj316@whu.edu.cn; kingofwuda@gmail.com	104	;;;;				292IR			6	FOREIGN LIT STUD	Foreign Lit. Stud.	Chinese		22		152 LUOYU RD, WUHAN, 430079, PEOPLES R CHINA	DEC	10	WUHAN		J	CENTRAL CHINA NORMAL UNIV	2013		Ren, XJ (reprint author), Wuhan Univ, Sch Foreign Languages & Literature, Wuhan 430072, Peoples R China.	Literature			1003-7519	FOREIGN LITERATURE STUDIES
A00254	This paper is a response to Yin Qiping's article "The Canon Is 'Ferry': The Spiritual Sources of the Contemporary Western Poetry", which begins with Paul Celan's poem "From Darkness to Darkness". A closer reading of the poem leads to the revelation of the poet's awareness of his own role as both a transferer (translator) and a transporter (ferryman), a responsibility that helps shake off the infa…	Min, Chen		Min, C			105							Western poetry; canon; ferry; translation; intercultural dialogue		Article		i@hznu.edu.cn	112	;;;;				292IR			6	FOREIGN LIT STUD	Foreign Lit. Stud.	Chinese		19		152 LUOYU RD, WUHAN, 430079, PEOPLES R CHINA	DEC	8	WUHAN		J	CENTRAL CHINA NORMAL UNIV	2013		Min, C (reprint author), Hangzhou Normal Univ, Sch Foreign Languages, Hangzhou 310036, Zhejiang, Peoples R China.	Literature			1003-7519	FOREIGN LITERATURE STUDIES
A00255	The title of Reflections in a Golden Eye has been the focus of critical attention, as the Gothic mirror image carries great depth of meaning concerning the themes of McCullers' fiction. However, its traditional interpretation as the "mirror of art" overlooks the fact that the mirror image is formed in the eye of a nonhuman subject, which actually symbolizes the "mirror of nature" that carries rat…	Bin, Lin		Bin, L			113							McCullers; nature; civilization; mirror image; eco-feminism		Article		christine_lin@126.com	120	;;;;				292IR			6	FOREIGN LIT STUD	Foreign Lit. Stud.	Chinese		14		152 LUOYU RD, WUHAN, 430079, PEOPLES R CHINA	DEC	8	WUHAN		J	CENTRAL CHINA NORMAL UNIV	2013		Bin, L (reprint author), Xiamen Univ, Dept English, Coll Foreign Languages & Cultures, Xiamen 361005, Peoples R China.	Literature			1003-7519	FOREIGN LITERATURE STUDIES
A00256	With four generations of scholars' successive efforts, Japanese literary studies in China have evolved, over the past hundred years, from non-professional to professional, from the pursuit of practical value to that of academic and aesthetic value, playing a significant role in promoting literary and cultural innovations as well as changes in social and political thought in Chinese history. With …	Wang Xiangyuan		Wang, XY			121							;;Chinese academic history; Japanese literature; literary studies;;;literary criticism		Article		wangxiangyuan1962@163.com	129	;;;;				292IR			6	FOREIGN LIT STUD	Foreign Lit. Stud.	Chinese		0		152 LUOYU RD, WUHAN, 430079, PEOPLES R CHINA	DEC	9	WUHAN		J	CENTRAL CHINA NORMAL UNIV	2013		Wang, XY (reprint author), Beijing Normal Univ, Sch Chinese Language & Literature, Beijing 100875, Peoples R China.	Literature			1003-7519	FOREIGN LITERATURE STUDIES
A00257	Having been translated and introduced by several scholars, Byron and his "The Isles of Greece" were widely spread in Late-Qing China. Projecting Byron's Greece on to China, the translators such as Liang Qichao and Ma Junwu intended to bring into China romantic nationalist revolutionary discourse. Against the revolutionaries' Byron image, Wang Guowei offered his harsh but marginal criticism. Later…	;;Lu Wenting;;He Xizhang		;;Lu, WT;;He, XZ			130							;;Byron; "The Isles of Greece"; mediatranslatology; romanticism;;;nationalism; discourse of revolution		Article		mirandalu@sina.com; Hexizhang@126.com	137	;;;;				292IR			6	FOREIGN LIT STUD	Foreign Lit. Stud.	Chinese		11		152 LUOYU RD, WUHAN, 430079, PEOPLES R CHINA	DEC	8	WUHAN		J	CENTRAL CHINA NORMAL UNIV	2013		Lu, WT (reprint author), Huazhong Univ Sci & Technol, Sch Humanities, Wuhan 430074, Peoples R China.	Literature			1003-7519	FOREIGN LITERATURE STUDIES
A00258	Marjorie Perloff's Poetics in a New Key: Interviews and Essays is a newly published book that embodies her comprehensive view of poetry. This book shows Perloff as poet and critic with superior foresight in poetic criticism in that she points out the tendency of digitalization of writing poetry in the age of streaming media. She is, at the same time, a traditional and classic critic and poet in t…	Wang Songlin		Wang, SL			138							Marjorie Perloff; sound; value; poetry performance		Article		wangsonglin@nbu.edu.cn	141	;;;;				292IR			6	FOREIGN LIT STUD	Foreign Lit. Stud.	Chinese		3		152 LUOYU RD, WUHAN, 430079, PEOPLES R CHINA	DEC	4	WUHAN		J	CENTRAL CHINA NORMAL UNIV	2013		Wang, SL (reprint author), Ningbo Univ, Ningbo 315211, Zhejiang, Peoples R China.	Literature			1003-7519	FOREIGN LITERATURE STUDIES
A00259	With reference to Marjorie Perloff's Poetics in a New Key and other works, this paper attempts to examine Perloff's turn to poetry and her way of doing poetics. It argues that Perloff is paradoxically good at reflecting her formed opinions on the one hand and insisting on her individual way of practicing poetics on the other, which constantly enables her to acquire new knowledge. Additionally, sh…	Shang Biwu		Shang, BW			142							Poetics in a New Key; Marjorie Perloff; critic		Article		biwushang@gmail.com	145	;;;;				292IR			6	FOREIGN LIT STUD	Foreign Lit. Stud.	Chinese		3		152 LUOYU RD, WUHAN, 430079, PEOPLES R CHINA	DEC	4	WUHAN		J	CENTRAL CHINA NORMAL UNIV	2013		Shang, BW (reprint author), Shanghai Jiao Tong Univ, Shanghai 200240, Peoples R China.	Literature			1003-7519	FOREIGN LITERATURE STUDIES
A00260	Black Humor and the Tradition of Humor in American Fiction by Su Hui tries to provide an elaborate redefinition of humor in American fiction, through a diachronic description of its tradition in American literary history and a synchronic exegesis of its formal peculiarities across cultures and nations, with a specific focus on the nature of American humor in terms of its national character and li…	Gang, Zhu		Gang, Z			146							;;Su Hui; American humor; tradition of humor; Mark Twain; American;;mentality		Article		gzhu@nju.edu.cn	150	;;;;				292IR			6	FOREIGN LIT STUD	Foreign Lit. Stud.	Chinese		7		152 LUOYU RD, WUHAN, 430079, PEOPLES R CHINA	DEC	5	WUHAN		J	CENTRAL CHINA NORMAL UNIV	2013		Gang, Z (reprint author), Nanjing Univ, Sch Foreign Studies, Nanjing 210023, Jiangsu, Peoples R China.	Literature			1003-7519	FOREIGN LITERATURE STUDIES
A00261	Zheng Yanhong, in her new book Kenneth Rexroth and Chinese Culture, studies the influences of China on Rexroth from the perspectives of English translation of Chinese poems, poetry creation, Taoism and Zen Buddism, and probes into the causes of Rexroth's fascination with Chinese culture. Rexroth has himself well cultivated in the Chinese culture which is considered "the other" by many Western peo…	Li Zhimin		Li, ZM			151							poetry; culture; Zheng Yanhong; Kenneth Rexroth		Article		washingtonlzm@sina.com	154	;;;;				292IR			6	FOREIGN LIT STUD	Foreign Lit. Stud.	Chinese		4		152 LUOYU RD, WUHAN, 430079, PEOPLES R CHINA	DEC	4	WUHAN		J	CENTRAL CHINA NORMAL UNIV	2013		Li, ZM (reprint author), Guangzhou Univ, Sch Foreign Studies, Guangzhou 510006, Guangdong, Peoples R China.	Literature			1003-7519	FOREIGN LITERATURE STUDIES
A00262	Though having been profoundly influenced by Russian humanistic thoughts, China should not remain as a passive receptacle, but should start a dialogue with Russian humanistic thoughts, which is the core thought of Russian Humanistic Thoughts and China. The book analyzes the influence of such important Russian thinkers as Bakhtin and Lotman on China, and the important role of translation in the dia…	Wang Zhigeng		Wang, ZG			155							Russian humanistic thoughts; influence study; M. M. Bakhtin; dialogue		Article		wangzhigeng@163.com	158	;;;;				292IR			6	FOREIGN LIT STUD	Foreign Lit. Stud.	Chinese		0		152 LUOYU RD, WUHAN, 430079, PEOPLES R CHINA	DEC	4	WUHAN		J	CENTRAL CHINA NORMAL UNIV	2013		Wang, ZG (reprint author), Nankai Univ, Sch Literature, Tianjin 300071, Peoples R China.	Literature			1003-7519	FOREIGN LITERATURE STUDIES
A00263	Alexander Pope is neglected in the academic history of China. Due to the stereotyped opinion of Neoclassicism, the elements of morality have not been given sufficient attention. On Alexander Pope's Poetry, written by Ma Xian, focuses on the moral themes of Pope's poetry. It analyzes and constructs an ethical system that is based on harmony, nature, reason, mean and order. On Alexander Pope's Poet…	Chen Lizhen		Chen, LZ			159							Pope; academic history; On Alexander Pope's Poetry		Article		chenleezhen@163.com	162	;;;;				292IR			6	FOREIGN LIT STUD	Foreign Lit. Stud.	Chinese		4		152 LUOYU RD, WUHAN, 430079, PEOPLES R CHINA	DEC	4	WUHAN		J	CENTRAL CHINA NORMAL UNIV	2013		Chen, LZ (reprint author), Hangzhou Normal Univ, Sch Foreign Languages, Hangzhou 311121, Zhejiang, Peoples R China.	Literature			1003-7519	FOREIGN LITERATURE STUDIES
A00264	The success of Ye Jun's new monograph is inseparable from his thoughts about the study of academic history. These thoughts cover such issues as the scope of the study of ideological history, the balance between global view and localization, and the Chinese academia's participation in international dialogue. Though aimed at different goals, these thoughts are internally coherent, and may broaden t…	Chen Jianhua		Chen, JH			163							Ye Jun; academic history; thoughts		Article		jhchen@zhwx.ecnu.edu.cn	165	;;;;				292IR			6	FOREIGN LIT STUD	Foreign Lit. Stud.	Chinese		1		152 LUOYU RD, WUHAN, 430079, PEOPLES R CHINA	DEC	3	WUHAN		J	CENTRAL CHINA NORMAL UNIV	2013		Chen, JH (reprint author), E China Normal Univ, Shanghai 200241, Peoples R China.	Literature			1003-7519	FOREIGN LITERATURE STUDIES
A00265	In Narrative Hospitality in Late Victorian Fiction: Novel Ethics, Rachel Hollander takes inspiration from Levinasian ethics of alterity into her analysis of several late Victorian realist fictions, particularly their transitional features in subjects and narrative forms, attempting to give an ethical interpretation of the transition from realism to modernism. She argues that, with the Empire bein…	Chen Houliang		Chen, HL			166							;;Hollander; novel ethics; ethics of hospitality; ethics of sympathy; late;;Victorian fiction		Article		chenhouliang1979@aliyun.com	170	;;;;				292IR			6	FOREIGN LIT STUD	Foreign Lit. Stud.	Chinese		2		152 LUOYU RD, WUHAN, 430079, PEOPLES R CHINA	DEC	5	WUHAN		J	CENTRAL CHINA NORMAL UNIV	2013		Chen, HL (reprint author), Cent China Normal Univ, Sch Chinese Language & Literature, Wuhan 430079, Peoples R China.	Literature			1003-7519	FOREIGN LITERATURE STUDIES
A00266	Without any more bustle of new genres or theories in the world literature and literary criticism in the first two decades of the 21st century, the world of literature assumes a tendency of "ethical turn", specifically found in China, where ethical literary criticism has now become a major national theoretical program. Many critics have come to the high awareness of their social responsibility and…	;;Yan, Xu;;Yun, Xi		;;Yan, X;;Yun, X			171							Ethical Literary Criticism; new dimension; vitality		Article		xuyan@nbu.edu.cn; wangsonglin@nbu.edu.cn	176	;;;;				292IR			6	FOREIGN LIT STUD	Foreign Lit. Stud.	Chinese		1		152 LUOYU RD, WUHAN, 430079, PEOPLES R CHINA	DEC	6	WUHAN		J	CENTRAL CHINA NORMAL UNIV	2013		Yan, X (reprint author), Ningbo Univ, Fac Foreign Languages, Ningbo 315211, Zhejiang, Peoples R China.	Literature			1003-7519	FOREIGN LITERATURE STUDIES
A00267	Viewing social commerce as settings that offer users an electronic commerce platform to specifically support participation and co-creation activities, we present five rigorously conducted empirical research studies that quantitatively measure business value contributions generated from consumer co-creation activities. The studies are based on business data from five different social commerce sett…	;;Lang, Karl R.;;Li, Ting		;;Lang, KR;;Li, T			5							;;business value; co-creation; consumer participation; empirical research;;;social commerce	10.2753/JEC1086-4415180200	Editorial Material		karl.lang@baruch.cuny.edu; tli@rsm.nl	10	;;;;				295TL			2	INT J ELECTRON COMM	Int. J. Electron. Commer.	English		2		80 BUSINESS PARK DR, ARMONK, NY 10504 USA	WIN	6	ARMONK		J	M E SHARPE INC	2013		Lang, KR (reprint author), CUNY City Coll, Baruch Coll, Zicklin Sch Business, New York, NY 10031 USA.	Business & Economics; Computer Science			1086-4415	INTERNATIONAL JOURNAL OF ELECTRONIC COMMERCE
A00268	This study examines the value of the time that a user spends to participate in a social game. We focus on how a massive multiplayer online role-playing game (MMORPG) vendor can establish prices to encourage participation and retain its players. We estimate value through an application of the hedonic pricing model and analyze a data set for an MMORPG in Korea. The results permit us to estimate the…	;;Kim, Kwansoo;;Yoo, Byungjoon;;Kauffman, Robert J.		;;Kim, K;;Yoo, B;;Kauffman, RJ			11							;;Customer valuation; econometrics; field study; hedonic pricing; hedonic;;value; MMORPGs; online games; role-playing games; social gaming	10.2753/JEC1086-4415180201	Article		ksu3377@hotmail.com; byoo@snu.ac.kr; rkauffman@smu.edu.sg	49	;;;;		;;Lee Kuan Yew Faculty Fellowship for Research Excellence; Singapore;;National Research Foundation under the International Research Centre at;;Singapore Funding Initiative; Institute of Management Research at Seoul;;National University	;;An earlier version of this article was presented at the 2012;;International Conference on Electronic Commerce, Singapore, August 2012.;;We appreciate comments from the session cochairs, Karl Reiner Lang and;;Ting Li, as well as Mei Lin, Kustini Lim, and other participants in the;;session. We further benefited from discussions about gaming with Gulcin;;Cribb and some suggestions from Editor-in-C…	295TL		;;NETWORK EXTERNALITIES; VIRTUAL WORLDS; COMMUNITY LOYALTY; HEDONIC;;PRICES; VALUE CREATION; ONLINE GAMES; DEMAND; MODEL; OPPORTUNITIES;;;PERSPECTIVE	2	INT J ELECTRON COMM	Int. J. Electron. Commer.	English		58		80 BUSINESS PARK DR, ARMONK, NY 10504 USA	WIN	39	ARMONK		J	M E SHARPE INC	2013	KAUFFMAN, Robert/G-2767-2012	Kim, K (reprint author), Seoul Natl Univ, Grad Sch Business, Seoul 151, South Korea.	Business & Economics; Computer Science			1086-4415	INTERNATIONAL JOURNAL OF ELECTRONIC COMMERCE
A00269	Recommending diverse products to consumers is a new strategy for the next generation of recommender systems. However, no existing studies have empirically identified the impact of product diversity on consumer behavior. The aim of this study is to explain how product category diversity affects customer retention rates. To answer this research question, we examine how the number of product categor…	;;Park, Sung-Hyuk;;Han, Sang Pil		;;Park, SH;;Han, SP			51							;;Cross-selling; customer retention; econometrics; product diversity;;;recommender systems	10.2753/JEC1086-4415180202	Article		sunghyuk.dave.park@gmail.com; sangphan@cityu.edu.hk	71	;;;;		Recobell	;;An earlier version of this paper was presented at the 2012 International;;Conference on Electronic Commerce. The authors are grateful to the;;special issue editors, Karl Reiner Lang and Ting Li, and the anonymous;;reviewers for their valuable suggestions and extremely helpful comments.;;Any remaining errors are the authors'. The work described in this paper;;was partially supported by a researc…	295TL		LIFETIME VALUE; LONG TAIL; SYSTEMS; SALES; IMPACT	2	INT J ELECTRON COMM	Int. J. Electron. Commer.	English		37		80 BUSINESS PARK DR, ARMONK, NY 10504 USA	WIN	21	ARMONK		J	M E SHARPE INC	2013		Park, SH (reprint author), NYU, Stern Sch Business, New York, NY 10003 USA.	Business & Economics; Computer Science			1086-4415	INTERNATIONAL JOURNAL OF ELECTRONIC COMMERCE
A00270	Viewing social communication on group-buying platforms as a new form of IT -enabled coordination mechanisms, we examine the impact of group size and communication capacity on buyer performance on group-buying platforms. Using an economic experiment, we found that although larger groups were able to extract moderately higher surplus on average than smaller groups, there was also a negative impact …	;;Pelaez, Alexander;;Yu, Martin Y.;;Lang, Karl R.		;;Pelaez, A;;Yu, MY;;Lang, KR			127							;;Buying platforms; coordination; electronic market design; experimental;;economics; group buying; information overload; social buying; task;;complexity	10.2753/JEC1086-4415180205	Article		;;alex.pelaez@baruch.cuny.edu; yuechengyue@gmail.com;;;karl.lang@baruch.cuny.edu	157	;;;;				295TL		;;TASK COMPLEXITY; MANUFACTURING-INDUSTRIES; INFORMATION; COMMERCE;;;CONFLICT; FRAMEWORK; INTERNET; STRATEGY; SUPPORT; MARKETS	2	INT J ELECTRON COMM	Int. J. Electron. Commer.	English		56		80 BUSINESS PARK DR, ARMONK, NY 10504 USA	WIN	31	ARMONK		J	M E SHARPE INC	2013		Pelaez, A (reprint author), Hofstra Univ, Hempstead, NY 11550 USA.	Business & Economics; Computer Science			1086-4415	INTERNATIONAL JOURNAL OF ELECTRONIC COMMERCE
A00271	The traditional Chinese medicine (TCM) theory of traditional Chinese health exercise (TCHE) is analyzed. The effect of meridians and acupoints contained in TCHE is summarized, the treatment methods of tonifying deficiencies and reducing excesses applied in TCHE are discussed, the regulation of Zang-fu organs are emphasized, and the leading role of Qi is introduced. The exercise prescription and p…	;;Jiang, Yan;;Zou, Jun		;;Jiang, Y;;Zou, J			204							Traditional Chinese health exercise; Traditional Chinese medicine theory	10.1016/j.jshs.2013.03.008	Review		zoujun777@126.com	208	;;;;		;;National Nature Science Foundation in China [81170323]; Shanghai Key Lab;;of Human Performance (Shanghai University of Sport), Shanghai, China;;[11DZ2261100]	;;This study was supported by the National Nature Science Foundation in;;China (No. 81170323) and Shanghai Key Lab of Human Performance (Shanghai;;University of Sport) (No. 11DZ2261100), Shanghai, China.	291ZU		;;RANDOMIZED CONTROLLED-TRIAL; TAI CHI CHUAN; YIN-YANG; KNEE;;;OSTEOARTHRITIS; QUALITY; THERAPY	4	J SPORT HEALTH SCI	J. Sport Health Sci.	English		43		PO BOX 211, 1000 AE AMSTERDAM, NETHERLANDS	DEC	5	AMSTERDAM		J	ELSEVIER SCIENCE BV	2013		Zou, J (reprint author), Shanghai Univ Sport, Sci Res Dept, Shanghai 200438, Peoples R China.	Social Sciences - Other Topics; Sport Sciences			2095-2546	JOURNAL OF SPORT AND HEALTH SCIENCE
A00272	;;Purpose: A randomized, controlled trial was conducted to determine whether a 6-week low calorie diet and aerobic exercise intervention could alter metabolic syndrome (MetS) risk factors in pre-pubescent obese Chinese children.;;Methods: The subjects were randomized into diet and exercise (DE) and control (C) groups. The DE group ingested 1600-2000 kcal/day adjusted to each participant's basal m…	;;Luo, Beibei;;Yang, Yang;;Nieman, David C.;;Zhang, Yajun;;Wang, Jie;;Wang, Ru;;Chen, Peijie		;;Luo, BB;;Yang, Y;;Nieman, DC;;Zhang, YJ;;Wang, J;;Wang, R;;Chen, PJ			236							BMI; Children; Insulin; Obesity; Triglycerides; Waist circumference	10.1016/j.jshs.2013.05.001	Article		chenpeijie@sus.edu.cn	241	;;;;		;;Shanghai Key Laboratory of Human Performance [11DZ2261100, yjscx2012007,;;xsxr2012045]	;;This study was supported by the Shanghai Key Laboratory of Human;;Performance (NO. 11DZ2261100), Grants yjscx2012007 and xsxr2012045. We;;thank Professor Wenhe Chen and all the staff at the Shanghai Dianfeng;;Sports and Health Management Co. Ltd. for their assistance.	291ZU		;;RESTING ENERGY-EXPENDITURE; PHYSICAL-ACTIVITY; BODY-COMPOSITION;;;WEIGHT-LOSS; ADOLESCENTS; OVERWEIGHT; CHILDHOOD; PREVALENCE; RESISTANCE;;;PRESSURE	4	J SPORT HEALTH SCI	J. Sport Health Sci.	English		29		PO BOX 211, 1000 AE AMSTERDAM, NETHERLANDS	DEC	6	AMSTERDAM		J	ELSEVIER SCIENCE BV	2013		Chen, PJ (reprint author), Shanghai Univ Sport, Minist Educ, Key Lab Exercise & Hlth Sci, Shanghai 200438, Peoples R China.	Social Sciences - Other Topics; Sport Sciences			2095-2546	JOURNAL OF SPORT AND HEALTH SCIENCE
A00273	Cyberbullying has become a common occurrence among adolescents worldwide; however, it has yet to receive adequate scholarly attention in China, especially in the mainland. The present study investigated the epidemiological characteristics and risk factors of cyberbullying, utilizing a sample of 1,438 high school students from central China. Findings revealed that cyberbullying among high school s…	;;Zhou, Zongkui;;Tang, Hanying;;Tian, Yuan;;Wei, Hua;;Zhang, Fengjuan;;Morrison, Chelsey M.		;;Zhou, ZK;;Tang, HY;;Tian, Y;;Wei, H;;Zhang, FJ;;Morrison, CM			630							Chinese high school students; cyberbullying; intervention; risk factors	10.1177/0143034313479692	Article		zhouzk@mail.ccnu.edu.cn	647	;;;;				292QL		;;BULLYING BEHAVIORS; ADOLESCENTS; VICTIMIZATION; CYBER; PREVALENCE;;;VICTIMS; IMPACT; EXPERIENCES; CHILDREN; BULLIES	6	SCHOOL PSYCHOL INT	Sch. Psychol. Int.	English		48		1 OLIVERS YARD, 55 CITY ROAD, LONDON EC1Y 1SP, ENGLAND	DEC	18	LONDON		J	SAGE PUBLICATIONS LTD	2013		Zhou, ZK (reprint author), Cent China Normal Univ, Sch Psychol, Key Lab Adolescent CyberPsychol & Behav CCNU, Minist Educ, Wuhan, Hubei, Peoples R China.	Psychology		SI	0143-0343	SCHOOL PSYCHOLOGY INTERNATIONAL
A00274		Wan, Marco		Wan, M			583								10.1177/0964663913502278	Book Review			586	;;;;				292RD			4	SOC LEGAL STUD	Soc. Leg. Stud.	English		3		1 OLIVERS YARD, 55 CITY ROAD, LONDON EC1Y 1SP, ENGLAND	DEC	4	LONDON		J	SAGE PUBLICATIONS LTD	2013		Wan, M (reprint author), Univ Hong Kong, Hong Kong, Hong Kong, Peoples R China.	Criminology & Penology; Government & Law; Social Sciences - Other Topics			0964-6639	SOCIAL & LEGAL STUDIES
A00275	Morning commuters choose their departure times based on a combination of factors the chances of running into bottleneck congestion, the likely schedule delays, and parking space availability. This study investigates the morning commute problem with both bottleneck congestion and parking space constraints. In particular, it considers the situation when some commuters have reserved parking spots wh…	;;Yang, Hai;;Liu, Wei;;Wang, Xiaolei;;Zhang, Xiaoning		;;Yang, H;;Liu, W;;Wang, XL;;Zhang, XN			106							;;Morning commute; Parking space constraint; Bottleneck congestion;;;Dynamic traffic equilibrium	10.1016/j.trb.2013.10.003	Article		cehyang@ust.hk	118	;;;;		;;Hong Kong's Research Grants Council [HKUST621111]; National Natural;;Science Foundation of China [71125004]	;;The authors wish to express their thanks to Marvin Kraus of Boston;;College and anonymous reviewers for their useful comments on an earlier;;version of the paper. The authors are also thankful to Associate Editor,;;Richard Arnott of The University of California, Riverside, for his;;editorial handling and decision of this manuscript. The work described;;in this paper was supported by Grants from…	294YA		;;ELASTIC DEMAND; HETEROGENEOUS COMMUTERS; TRAFFIC BOTTLENECK; USER;;EQUILIBRIUM; ECONOMICS; MODEL; TIME; TOLLS; POLICIES; CHOICE		TRANSPORT RES B-METH	Transp. Res. Pt. B-Methodol.	English		29		THE BOULEVARD, LANGFORD LANE, KIDLINGTON, OXFORD OX5 1GB, ENGLAND	DEC	13	OXFORD		J	PERGAMON-ELSEVIER SCIENCE LTD	2013	Yang, Hai/F-8848-2011	Yang, H (reprint author), Hong Kong Univ Sci & Technol, Dept Civil & Environm Engn, Kowloon, Hong Kong, Peoples R China.	;;Business & Economics; Engineering; Operations Research & Management;;Science; Transportation		SI	0191-2615	TRANSPORTATION RESEARCH PART B-METHODOLOGICAL
A00276	A common way to determine values of travel time and schedule delay is to estimate departure time choice models, using stated preference (SP) or revealed preference (RP) data. The latter are used less frequently, mainly because of the difficulties to collect the data required for the model estimation. One main requirement is knowledge of the (expected) travel times for both chosen and unchosen dep…	;;Peer, Stefanie;;Knockaert, Jasper;;Koster, Paul;;Tseng, Yin-Yen;;Verhoef, Erik T.		;;Peer, S;;Knockaert, J;;Koster, P;;Tseng, YY;;Verhoef, ET			134							;;Valuation of travel time and schedule delays; Door-to-door travel times;;;Departure time choice; Revealed preference (RP) data; GPS data;;;Geographically weighted regression (GWR)	10.1016/j.trb.2013.10.006	Article		s.peer@vu.nl	150	;;;;		;;Dutch Ministry of Infrastructure and the Environment; TRANSUMO;;foundation; ERC [246969]; IPRISM for the research of Jasper Knockaert	;;We would like to thank two anonymous referees for their helpful;;comments. The Dutch Ministry of Infrastructure and the Environment as;;well as by the TRANSUMO foundation are thanked for their financial;;support. Also funding from the ERC (Advanced Grant OPTION #246969) for;;the research of Paul Koster and Erik Verhoef, and from IPRISM for the;;research of Jasper Knockaert is gratefully acknowl…	294YA		WEIGHTED REGRESSION; RELIABILITY; TRANSPORT; NETWORK; CONGESTION; TRIPS		TRANSPORT RES B-METH	Transp. Res. Pt. B-Methodol.	English		58		THE BOULEVARD, LANGFORD LANE, KIDLINGTON, OXFORD OX5 1GB, ENGLAND	DEC	17	OXFORD		J	PERGAMON-ELSEVIER SCIENCE LTD	2013		Peer, S (reprint author), Vrije Univ Amsterdam, Dept Spatial Econ, De Boelelaan 1105, NL-1081 HV Amsterdam, Netherlands.	;;Business & Economics; Engineering; Operations Research & Management;;Science; Transportation		SI	0191-2615	TRANSPORTATION RESEARCH PART B-METHODOLOGICAL
A00277	Many countries pledged to reduce their greenhouse gas emissions by 2020 during the 2009 Copenhagen Accord and the 2010 Cancun Agreement. This paper evaluates the Candin pledges from two aspects, namely, temperature increase and carbon Gini coefficient. The Model for the Assessment of Greenhouse-gas Induced Climate Change is used to calculate the temperature increase, and the carbon Gini coefficie…	;;Ha, Yuejiao;;Teng, Fei		;;Ha, YJ;;Teng, F			856			Suzhou, PEOPLES R CHINA		4th International Conference on Applied Energy (ICAE)	JUL 01-04, 2012	;;Climate change; Temperature increase; Carbon Gini coefficient; Global;;social economic scenarios; Downscaling algorithms	10.1016/j.apenergy.2013.05.021	Article; Proceedings Paper		tengfei@tsinghua.edu.cn	865	;;;;				285FA		;;CUMULATIVE CARBON EMISSIONS; CLIMATE-CHANGE; CO2 EMISSIONS; SCENARIOS;;;INEQUALITIES; MODELS; IMPACT; SRES		APPL ENERG	Appl. Energy	English		42		THE BOULEVARD, LANGFORD LANE, KIDLINGTON, OXFORD OX5 1GB, OXON, ENGLAND	DEC	10	OXFORD		J	ELSEVIER SCI LTD	2013		Teng, F (reprint author), Tsinghua Univ, Inst Energy Environm & Econ, Energy Sci Bldg Room C402, Beijing 100084, Peoples R China.	Energy & Fuels; Engineering		SI	0306-2619	APPLIED ENERGY
A00278	Carbon capture and storage (CCS) technology, which has been considering one of the effective carbon reduction options, is induced in the self-constructed aggregated economic technological model in this paper, and the development potential of CCS under the given climate policies is depicted. We explore the most cost-effective way of targeted CO2 abatement to reach specific climate stabilization ta…	;;Duan, Hong-Bo;;Fan, Ying;;Zhu, Lei		;;Duan, HB;;Fan, Y;;Zhu, L			866			Suzhou, PEOPLES R CHINA		4th International Conference on Applied Energy (ICAE)	JUL 01-04, 2012	;;Climate modeling; CCS; Multiple non-carbon energy technologies; Carbon;;tax; Subsidies; CO2 abatement	10.1016/j.apenergy.2013.01.047	Article; Proceedings Paper		yfan@casipm.ac.cn	875	;;;;				285FA		RESEARCH-AND-DEVELOPMENT; CARBON CAPTURE; STORAGE; ENTICE; PLANT; DICE		APPL ENERG	Appl. Energy	English		39		THE BOULEVARD, LANGFORD LANE, KIDLINGTON, OXFORD OX5 1GB, OXON, ENGLAND	DEC	10	OXFORD		J	ELSEVIER SCI LTD	2013		Fan, Y (reprint author), Chinese Acad Sci, Inst Policy & Management, Ctr Energy & Environm Policy Res, Beijing 100190, Peoples R China.	Energy & Fuels; Engineering		SI	0306-2619	APPLIED ENERGY
A00279	;;As one of the three high-energy consumption sectors (industry, building, and transportation) in China, the transport sector faced a devastating resource and environment challenge. The transport sector was reportedly responsible for about 15.9% of the country's total final energy consumption in 2008. This paper investigates the energy consumption and efficiency of China's transport sector from 2…	;;Chung, William;;Zhou, Guanghui;;Yeung, Iris M. H.		;;Chung, W;;Zhou, GH;;Yeung, IMH			1066			Suzhou, PEOPLES R CHINA		4th International Conference on Applied Energy (ICAE)	JUL 01-04, 2012	Energy efficiency; China transport sector; Policy analysis; LMDI	10.1016/j.apenergy.2013.06.006	Article; Proceedings Paper		;;william.chung@cityu.edu.hk; zhou.guanghui@foxmail.com;;;msiris@cityu.edu.hk	1077	;;;;				285FA		;;DECOMPOSITION ANALYSIS; CO2 EMISSIONS; ECONOMIC-GROWTH; LMDI METHOD;;;INFRASTRUCTURE; INDEX		APPL ENERG	Appl. Energy	English		31		THE BOULEVARD, LANGFORD LANE, KIDLINGTON, OXFORD OX5 1GB, OXON, ENGLAND	DEC	12	OXFORD		J	ELSEVIER SCI LTD	2013		Chung, W (reprint author), City Univ Hong Kong, Dept Management Sci, Kowloon, Hong Kong, Peoples R China.	Energy & Fuels; Engineering		SI	0306-2619	APPLIED ENERGY
A00280	The heavy losses of China's thermal power industry have attracted lots of attention. Besides the adjustment of power price, how to improve its poor performance becomes an important issue. Combining the cost Malmquist with the Luenberger index, this paper introduces a new method to measure the cost efficiencies of China's 30 provinces' thermal power industries with carbon emissions considered. Fur…	;;Wang, Yi-Shu;;Xie, Bai-Chen;;Shang, Li-Feng;;Li, Wen-Hua		;;Wang, YS;;Xie, BC;;Shang, LF;;Li, WH			1078			Suzhou, PEOPLES R CHINA		4th International Conference on Applied Energy (ICAE)	JUL 01-04, 2012	;;Coal price; Cost efficiency; Malmquist index; Sustainable development;;;Thermal power industry	10.1016/j.apenergy.2013.01.037	Article; Proceedings Paper		xiebaichen@tju.edu.cn	1086	;;;;				285FA		;;SENSITIVE PRODUCTIVITY GROWTH; ILLINOIS ELECTRIC UTILITIES; DATA;;ENVELOPMENT ANALYSIS; DIOXIDE EMISSIONS; GENERATION; SECTOR; INDEX;;;STRATEGY; OUTPUTS; POLICY		APPL ENERG	Appl. Energy	English		41		THE BOULEVARD, LANGFORD LANE, KIDLINGTON, OXFORD OX5 1GB, OXON, ENGLAND	DEC	9	OXFORD		J	ELSEVIER SCI LTD	2013		Xie, BC (reprint author), Tianjin Univ, Coll Management & Econ, Tianjin 300072, Peoples R China.	Energy & Fuels; Engineering		SI	0306-2619	APPLIED ENERGY
A00281	Energy and environmental efficiency evaluation has recently attracted increasing interest in China. In this study, we utilize the Range-Adjusted Measure (RAM) based nonparametric approach to evaluate the regional energy and environmental efficiency of China over the period of 2006-2010. The desirable/good and undesirable/bad outputs, as well as the energy and non-energy inputs are considered in t…	;;Wang, Ke;;Lu, Bin;;Wei, Yi-Ming		;;Wang, K;;Lu, B;;Wei, YM			1403			Suzhou, PEOPLES R CHINA		4th International Conference on Applied Energy (ICAE)	JUL 01-04, 2012	;;Energy efficiency; Environmental efficiency; Range-Adjusted Measure;;(RAM); Returns to scale; Damages to scale	10.1016/j.apenergy.2013.04.021	Article; Proceedings Paper		wangke03@yeah.net; justin-85@126.com; wei@bit.edu.cn	1415	;;;;				285FA		;;DATA ENVELOPMENT ANALYSIS; EMISSION PERFORMANCE; UNDESIRABLE OUTPUTS;;;MODELS; DISPOSABILITY; SCALE; DEA		APPL ENERG	Appl. Energy	English		28		THE BOULEVARD, LANGFORD LANE, KIDLINGTON, OXFORD OX5 1GB, OXON, ENGLAND	DEC	13	OXFORD		J	ELSEVIER SCI LTD	2013		Wang, K (reprint author), Beijing Inst Technol, Ctr Energy & Environm Policy Res, 5 S Zhongguancun St, Beijing 100081, Peoples R China.	Energy & Fuels; Engineering		SI	0306-2619	APPLIED ENERGY
A00282	We analyzed the impacts of incorporating local air quality improvement and environmental co-benefits into the climate policy and mitigation technology assessment of the cement sector in China. Local air quality can benefit from reducing greenhouse gas emissions, which consequently lowers abatement costs and strengthens the cost-effectiveness of mitigation technologies. We used a simplified approa…	;;Yang Xi;;Teng Fei;;Wang Gehua		;;Yang, X;;Teng, F;;Wang, GH			1446			Suzhou, PEOPLES R CHINA		4th International Conference on Applied Energy (ICAE)	JUL 01-04, 2012	;;Environmental damage; Co-benefit; Cement industry; Marginal abatement;;cost curve; Mitigation technology	10.1016/j.apenergy.2013.03.040	Article; Proceedings Paper		tengfei@tsinghua.edu.cn	1453	;;;;				285FA		;;FOSSIL ELECTRICITY-GENERATION; AIR-POLLUTION; ENERGY SYSTEM; ANCILLARY;;BENEFITS; IMPACT ASSESSMENT; EXTERNAL COSTS; HEALTH; SECTOR; CARBON;;;MODEL		APPL ENERG	Appl. Energy	English		45		THE BOULEVARD, LANGFORD LANE, KIDLINGTON, OXFORD OX5 1GB, OXON, ENGLAND	DEC	8	OXFORD		J	ELSEVIER SCI LTD	2013		Teng, F (reprint author), Tsinghua Univ, Inst Energy Environm & Econ, Energy Sci Bldg,Room C402, Beijing 100084, Peoples R China.	Energy & Fuels; Engineering		SI	0306-2619	APPLIED ENERGY
A00283	Carbon emission reduction is a long-term strategy for China to promote its economic and social development. However, emission reduction often involves a huge amount of technological investment, which could vary substantially across different provinces due to their discrepancy in economic and technological development levels. Emission trading as a useful policy instrument may help different provin…	;;Zhou, P.;;Zhang, L.;;Zhou, D. Q.;;Xia, W. J.		;;Zhou, P;;Zhang, L;;Zhou, DQ;;Xia, WJ			1518			Suzhou, PEOPLES R CHINA		4th International Conference on Applied Energy (ICAE)	JUL 01-04, 2012	Emission trading; Abatement cost; Fairness; Nonlinear programming; China	10.1016/j.apenergy.2013.04.013	Article; Proceedings Paper		cemzp@nuaa.edu.cn	1528	;;;;				285FA		;;EU ETS; SHADOW PRICE; VOLATILITY; EFFICIENCY; MARKETS; ENERGY; SULFUR;;;EQUITY; POLICY		APPL ENERG	Appl. Energy	English		26		THE BOULEVARD, LANGFORD LANE, KIDLINGTON, OXFORD OX5 1GB, OXON, ENGLAND	DEC	11	OXFORD		J	ELSEVIER SCI LTD	2013		Zhou, P (reprint author), Nanjing Univ Aeronaut & Astronaut, Coll Econ & Management, Nanjing 211106, Jiangsu, Peoples R China.	Energy & Fuels; Engineering		SI	0306-2619	APPLIED ENERGY
A00284	Employees constitute a large target group for energy conservation. Companies that want to reduce their energy consumption should promote their employees' participation. For successful energy saving in companies, employees should save energy on a continued basis, and develop the habit of energy saving. Unfortunately, success in having employees continue to save energy in organization is difficult.…	;;Zhang, Yixiang;;Wang, Zhaohua;;Zhou, Guanghui		;;Zhang, YX;;Wang, ZH;;Zhou, GH			1529			Suzhou, PEOPLES R CHINA		4th International Conference on Applied Energy (ICAE)	JUL 01-04, 2012	;;Energy saving habit; Social exchange theory; Personal norm; Perceived;;threat; Perceived harm	10.1016/j.apenergy.2013.04.006	Article; Proceedings Paper		wangzhaohua@bit.edu.cn	1535	;;;;				285FA		;;PRO-ENVIRONMENTAL BEHAVIOR; SOCIAL-EXCHANGE; ORGANIZATIONAL SUPPORT;;;CITIZENSHIP BEHAVIOR; ENERGY EFFICIENCY; NORM; KNOWLEDGE; CLIMATE;;;JUSTICE; MODEL		APPL ENERG	Appl. Energy	English		51		THE BOULEVARD, LANGFORD LANE, KIDLINGTON, OXFORD OX5 1GB, OXON, ENGLAND	DEC	7	OXFORD		J	ELSEVIER SCI LTD	2013		Wang, ZH (reprint author), Beijing Inst Technol, Sch Management & Econ, Beijing 100081, Peoples R China.	Energy & Fuels; Engineering		SI	0306-2619	APPLIED ENERGY
A00285	With the acceleration of oil marketisation and the rapid development of electronic information carriers, external information shocks can be easily and quickly transmitted to the oil market through the Internet. This paper analyses the impact of short- and long-run market concerns, derived from search query volumes in Google for different domains around the oil market on oil volatility using co-in…	;;Guo, Jian-Feng;;Ji, Qiang		;;Guo, JF;;Ji, Q			1536			Suzhou, PEOPLES R CHINA		4th International Conference on Applied Energy (ICAE)	JUL 01-04, 2012	Market concern; Oil price; Internet; Information transmission	10.1016/j.apenergy.2013.03.027	Article; Proceedings Paper		jqwxnjq@163.com	1543	;;;;				285FA		INFORMATION		APPL ENERG	Appl. Energy	English		27		THE BOULEVARD, LANGFORD LANE, KIDLINGTON, OXFORD OX5 1GB, OXON, ENGLAND	DEC	8	OXFORD		J	ELSEVIER SCI LTD	2013		Ji, Q (reprint author), Chinese Acad Sci, Inst Policy & Management, Ctr Energy & Environm Policy Res, Beijing 100190, Peoples R China.	Energy & Fuels; Engineering		SI	0306-2619	APPLIED ENERGY
A00286	The European Union Emissions Trading System (EU ETS) is the main international carbon trading market, in which European Union CO2 allowances (EUAs) are traded with increasing intensity. In order to help the market participants mitigate the market price risk, one possible way is to analyze the time range of market efficiency and the price discovery mechanism of EUA futures market and spot market. …	;;Tang, Bao-jun;;Shen, Cheng;;Gao, Chao		;;Tang, BJ;;Shen, C;;Gao, C			1544			Suzhou, PEOPLES R CHINA		4th International Conference on Applied Energy (ICAE)	JUL 01-04, 2012	;;Market efficiency; Cointegration; Vector error correction model;;;European carbon futures market	10.1016/j.apenergy.2013.02.017	Article; Proceedings Paper		tbj@bit.edu.cn	1547	;;;;				285FA				APPL ENERG	Appl. Energy	English		10		THE BOULEVARD, LANGFORD LANE, KIDLINGTON, OXFORD OX5 1GB, OXON, ENGLAND	DEC	4	OXFORD		J	ELSEVIER SCI LTD	2013		Tang, BJ (reprint author), Beijing Inst Technol, Ctr Energy & Environm Policy Res, Beijing 100081, Peoples R China.	Energy & Fuels; Engineering		SI	0306-2619	APPLIED ENERGY
A00287	This study uses a randomized controlled trial of a school-based anemia reduction program in rural China to examine how increased school emphasis on health promotion affects academic performance. Although education and health promotion are complementary functions of schools, they do compete for finite school resources. We compare the effects of a traditional program that provided only information …	;;Sylvia, Sean;;Luo, Renfu;;Zhang, Linxiu;;Shi, Yaojiang;;Medina, Alexis;;Rozelle, Scott		;;Sylvia, S;;Luo, RF;;Zhang, LX;;Shi, YJ;;Medina, A;;Rozelle, S			1							;;Economic development; Human capital; Teacher salaries; Resource;;allocation; Educational economics	10.1016/j.econedurev.2013.07.003	Article		;;SSylvia@arec.umd.edu; luorf.ccap@igsnrr.ac.cn;;;lxzhang.ccap@igsnrr.ac.cn; syj8882002@yahoo.com.cn;;;amedina5@stanford.edu; rozelle@stanford.edu	12	;;;;				287QR		;;RANDOMIZED-CONTROLLED-TRIALS; IRON SUPPLEMENTATION;;;DEVELOPING-COUNTRIES; INCENTIVE CONTRACTS; POOR COUNTIES; ANEMIA;;;PERFORMANCE; EDUCATION; ACHIEVEMENT; PREVALENCE		ECON EDUC REV	Econ. Educ. Rev.	English		54		THE BOULEVARD, LANGFORD LANE, KIDLINGTON, OXFORD OX5 1GB, ENGLAND	DEC	12	OXFORD		J	PERGAMON-ELSEVIER SCIENCE LTD	2013		Sylvia, S (reprint author), Univ Maryland, Dept Agr & Resource Econ, Symons Hall,Rm 2200, College Pk, MD 20742 USA.	Business & Economics; Education & Educational Research			0272-7757	ECONOMICS OF EDUCATION REVIEW
A00288	Using a natural experiment in the Chinese milk industry as background, this paper investigates the reactions of individual and institutional investors to food safety incidents. By classifying firms as either honest or dishonest, we find that: First, honest firms significantly outperform dishonest ones and receive more investment flow. Second, individual investors react to incidents more negativel…	;;Dai, Yunhao;;Kong, Dongmin;;Wang, Maobin		;;Dai, YH;;Kong, DM;;Wang, MB			23							;;Food safety incidents; Investor reaction; Firm values; Event study;;;Difference-in-differences	10.1016/j.foodpol.2013.08.004	Article		daiyunhao@hust.edu.cn; kongdm@hust.edu.cn; wangmaobin@uibe.edu.cn	31	;;;;		;;National Natural Science Foundation of China [71372130, 71173078];;;Fundamental Research Funds for the Central Universities of China;;[HUST-2013WQ025]	;;We thank Colin Poulton (Managing Editor), two anonymous referees, Martin;;Qiu, Shasha Liu, and Yan Sheng for helpful comments and valuable;;suggestions. All remaining errors and omissions are our own.We;;gratefully acknowledge the financial support from National Natural;;Science Foundation of China (grant no. 71372130; 71173078) and the;;Fundamental Research Funds for the Central Universities o…	285SA		CREDENCE GOODS; TRADES; INCENTIVES; QUALITY; PRICES; POLICY; TRUST		FOOD POLICY	Food Policy	English		36		THE BOULEVARD, LANGFORD LANE, KIDLINGTON, OXFORD OX5 1GB, OXON, ENGLAND	DEC	9	OXFORD		J	ELSEVIER SCI LTD	2013		Kong, DM (reprint author), Huazhong Univ Sci & Technol, Sch Econ, Wuhan 430074, Peoples R China.	;;Agriculture; Business & Economics; Food Science & Technology; Nutrition;;& Dietetics			0306-9192	FOOD POLICY
A00289	This article evaluates the causal impact of rural households' borrowing, through formal microcredit, on child nutrition in poor northwest China. The analysis exploits the panel data in rural Gansu between 2000 and 2004. Unobserved differences between borrowers and non-borrowers are controlled for in a dynamic fuzzy regression-discontinuity design creating a quasi-experimental environment for caus…	You, Jing		You, J			167							;;Microfinance; Child health; Nutrition; Regression-discontinuity design;;;Dynamic treatment effect; Rural China	10.1016/j.foodpol.2013.09.005	Article		jing.you@ruc.edu.cn	179	;;;;		;;Fundamental Research Funds for the Central Universities; Research Funds;;of Renmin University of China [13XNF049]	;;This research is supported by the Fundamental Research Funds for the;;Central Universities and the Research Funds of Renmin University of;;China (Grant No.: 13XNF049). The author is grateful to two anonymous;;referees and Satoru Shimokawa (the Editor) for helpful comments and;;suggestions on an earlier draft. All remaining errors are mine.	285SA		;;REGRESSION-DISCONTINUITY DESIGN; ELEMENTARY-SCHOOLS; INCOME GROWTH;;;CHINA; HEALTH; MICROFINANCE; MALNUTRITION; CONSUMPTION; POVERTY; QUALITY		FOOD POLICY	Food Policy	English		52		THE BOULEVARD, LANGFORD LANE, KIDLINGTON, OXFORD OX5 1GB, OXON, ENGLAND	DEC	13	OXFORD		J	ELSEVIER SCI LTD	2013		You, J (reprint author), Renmin Univ China, Sch Agr Econ & Rural Dev, 59 Zhongguancun St, Beijing 100872, Peoples R China.	;;Agriculture; Business & Economics; Food Science & Technology; Nutrition;;& Dietetics			0306-9192	FOOD POLICY
A00290	During the past one decade, the WorldFish Center and its research partners have made a systematic attempt to improve the productivity of carps through selective breeding in the major carp-producing countries in Asia. This paper analyses the potential impact of culturing the improved carp strain in five Asian countries (Bangladesh, China, India, Thailand and Vietnam), using a three-step procedure.…	;;Dey, Madan Mohan;;Kumar, Praduman;;Chen, Oai Li;;Khan, Md. Akhtaruzzaman;;Barik, Nagesh Kumar;;Li, Luping;;Nissapa, Ayut;;Ngoc Sao Pham		;;Dey, MM;;Kumar, P;;Chen, OL;;Khan, MA;;Barik, NK;;Li, LP;;Nissapa, A;;Pham, NS			306							Impact assessment; Genetically improved carp; Fish sector model	10.1016/j.foodpol.2013.10.003	Article		mdey@uaex.edu; pkumariari@rediffmail.com; ochen@uaex.edu	320	;;;;		Asian Development Bank; WorldFish Center [ADB RETA 6136]	;;The authors wish to acknowledge the financial support from Asian;;Development Bank and the WorldFish Center for conducting this study;;'Achieving Greater Food Security and Eliminating Poverty by;;Dissemination of Improved Carp Strains to Fish Farmers' (ADB RETA 6136).	285SA		;;AGRICULTURAL-RESEARCH; OREOCHROMIS-NILOTICUS; QUALITY IMPROVEMENT;;;ECONOMIC APPRAISAL; RESEARCH BENEFITS; DEMAND; RETURNS; FISH;;;POPULATION; INVESTMENT		FOOD POLICY	Food Policy	English		49		THE BOULEVARD, LANGFORD LANE, KIDLINGTON, OXFORD OX5 1GB, OXON, ENGLAND	DEC	15	OXFORD		J	ELSEVIER SCI LTD	2013		Dey, MM (reprint author), Univ Arkansas Pine Bluff, 1200 N Univ Dr,Mail Slot 4912, Pine Bluff, AR 71601 USA.	;;Agriculture; Business & Economics; Food Science & Technology; Nutrition;;& Dietetics			0306-9192	FOOD POLICY
A00291	Based on a Hotel ling-type model, this paper analyzes a differential game where two firms engage in quality-enhancing research and development (R&D). The analysis is formulated in terms of open-loop and feedback solutions. We find that the open-loop stationary levels of R&D and quality are socially efficient. Moreover, compared to open-loop strategies, feedback strategies lead to higher stationar…	;;Li, Changying;;Zhang, Jianhu		;;Li, CY;;Zhang, JH			660								10.1628/093245613X671184	Article		changyingli@sdu.edu.cn; jianhu2528785@163.com	679	;;;;				290NV		;;PLANNED OBSOLESCENCE; QUALITY; MODEL; INCENTIVES; EQUILIBRIUM;;;COMMITMENT; INNOVATION; GOODWILL	4	J INST THEOR ECON	J. Inst. Theor. Econ.-Z. Gesamte Staatswiss.	English		38		POSTFACH 2040, W-7400 TUBINGEN, GERMANY	DEC	20	TUBINGEN		J	J C B MOHR	2013		Li, CY (reprint author), Shandong Univ, Sch Econ, 27 Shanda South Rd, Jinan 250100, Shandong, Peoples R China.	Business & Economics			0932-4569	;;JOURNAL OF INSTITUTIONAL AND THEORETICAL ECONOMICS-ZEITSCHRIFT FUR DIE;;GESAMTE STAATSWISSENSCHAFT
A00292	This paper examines the relation between aggregate elasticity of substitution (AES) and capital accumulation (the AES-K relation) in a two-level, two-sector Solow growth model. There are two intermediate goods produced by capital and labor, while the final good is produced by combining the two intermediate goods. When capital (labor) is only used in producing one of the intermediate goods, then a…	;;Xue, Jianpo;;Yip, Chong K.		;;Xue, JP;;Yip, CK			60							;;Aggregate elasticity of substitution (AES); Normalized CES production;;function; Global and local AES-capital relations	10.1016/j.jmacro.2013.07.001	Article		chongkeeyip@cuhk.edu.hk	75	;;;;				288EJ		;;CAPITAL-SKILL COMPLEMENTARITY; INEQUALITY; TECHNOLOGY; DIAMOND; MODELS;;;SIGMA; LONG		J MACROECON	J. Macroecon.	English		28		BATON ROUGE, LA 70893 USA	DEC	16	BATON ROUGE	A	J	LOUISIANA STATE UNIV PR	2013		Yip, CK (reprint author), Chinese Univ Hong Kong, Dept Econ, Shatin, Hong Kong, Peoples R China.	Business & Economics		SI	0164-0704	JOURNAL OF MACROECONOMICS
A00293	The Knowledge-Intensive Business Services (KIBS) sector has been growing in the US in the recent decades. KIBS are used to overcome the information friction between intermediate inputs and the input users that is generated by technology improvement. We use a Schumpeterian growth model with endogenous market structure to analyze the impacts of KIBS on economic growth and welfare. The model provide…	;;Huang, Chien-Yu;;Ji, Lei		;;Huang, CY;;Ji, L			95							;;Knowledge-intensive business services; Endogenous market structure;;;Economic growth	10.1016/j.jmacro.2013.09.001	Article		hqy@swufe.edu.cn; lei.ji2004@gmail.com	106	;;;;				288EJ		RESEARCH-AND-DEVELOPMENT; PRODUCER SERVICES; FIRM SIZE; INPUTS		J MACROECON	J. Macroecon.	English		29		BATON ROUGE, LA 70893 USA	DEC	12	BATON ROUGE	A	J	LOUISIANA STATE UNIV PR	2013		Ji, L (reprint author), Skema Business Sch, 60 Rue Dostoieski,BP085, F-06902 Sophia Antipolis, France.	Business & Economics		SI	0164-0704	JOURNAL OF MACROECONOMICS
A00294	This paper explores frequency-specific implications of measurement error for the design of stabilization policy rules. Policy evaluation in the frequency domain is interesting because the characterization of policy effects frequency by frequency gives the policymaker additional information about the effects of a given policy. Further, some important aspects of policy analysis can be better unders…	Yu, Xiangrong		Yu, XR			307							;;Policy evaluation; Measurement error; Spectral analysis; Design limits;;;Model uncertainty; Monetary policy rules	10.1016/j.jmacro.2013.09.020	Article		cxyu@hkma.gov.hk	329	;;;;				288EL		;;OPTIMAL MONETARY-POLICY; REAL-TIME DATA; RATIONAL-EXPECTATIONS;;;UNCERTAINTY; RULES; INFORMATION; DESIGN; MODELS		J MACROECON	J. Macroecon.	English		37		BATON ROUGE, LA 70893 USA	DEC	23	BATON ROUGE	B	J	LOUISIANA STATE UNIV PR	2013		Yu, XR (reprint author), Hong Kong Monetary Author, Int Finance Ctr 2, 55-F,8 Finance St, Hong Kong, Hong Kong, Peoples R China.	Business & Economics			0164-0704	JOURNAL OF MACROECONOMICS
A00295	This paper examines how banking marketization affects the transmission of monetary policy through the bank lending channel, and tests whether the relationship between banking marketization and the transmission of monetary policy changes across heterogeneous banks. Our results suggest that as the degree of banking marketization increases, China's monetary policy transmission through the bank lendi…	;;Hou, Xiaohui;;Wang, Qing		;;Hou, XH;;Wang, Q			442							Banking marketization; Lending channel; Monetary policy; China	10.1016/j.jmacro.2013.07.004	Article		hxiaoh2006@163.com; walden126@126.com	451	;;;;				288EL		PANEL-DATA; CREDIT		J MACROECON	J. Macroecon.	English		31		BATON ROUGE, LA 70893 USA	DEC	10	BATON ROUGE	B	J	LOUISIANA STATE UNIV PR	2013		Hou, XH (reprint author), Xi An Jiao Tong Univ, Sch Econ & Finance, POB 1787,Xian Ning West Rd 28, Xian 710049, Shaanxi Provinc, Peoples R China.	Business & Economics			0164-0704	JOURNAL OF MACROECONOMICS
A00296		Hu, Xiangyu		Hu, XY			28									Article			51	;;;;				288GO			2	LATE IMP CHINA	Late Imp. China	English		23		;;JOURNALS PUBLISHING DIVISION, 2715 NORTH CHARLES ST, BALTIMORE, MD;;21218-4363 USA	DEC	24	BALTIMORE		J	JOHNS HOPKINS UNIV PRESS	2013		Hu, XY (reprint author), Renmin Univ China, Inst Qing Hist, Beijing, Peoples R China.	History			0884-3236	LATE IMPERIAL CHINA
A00297		Berezkin, Rostislav		Berezkin, R			83									Article			133	;;;;				288GO			2	LATE IMP CHINA	Late Imp. China	English		116		;;JOURNALS PUBLISHING DIVISION, 2715 NORTH CHARLES ST, BALTIMORE, MD;;21218-4363 USA	DEC	51	BALTIMORE		J	JOHNS HOPKINS UNIV PRESS	2013		Berezkin, R (reprint author), Fudan Univ, Natl Inst Adv Humanist Studies, Shanghai, Peoples R China.	History			0884-3236	LATE IMPERIAL CHINA
A00298	Information systems journal rankings and ratings help scholars focus their publishing efforts and are widely used surrogates for judging the quality of research. Over the years, numerous approaches have been used to rank IS journals, approaches such as citation metrics, school lists, acceptance rates, and expert assessments. However, the results of these approaches often conflict due to a host of…	;;Lowry, Paul Benjamin;;Moody, Gregory D.;;Gaskin, James;;Galletta, Dennis F.;;Humpherys, Sean L.;;Barlow, Jordan B.;;Wilson, David W.		;;Lowry, PB;;Moody, GD;;Gaskin, J;;Galletta, DF;;Humpherys, SL;;Barlow, JB;;Wilson, DW			993							;;Information systems journal rankings; scientometrics; bibliometrics;;;journal quality; SenS-6; SenS-8; self-citation; impact factor; h-index;;;social network analysis; expert opinion; composite ranking or rating;;;AIS Senior Scholars basket of journals; nomologies for dissemination of;;scientific knowledge		Article		;;Paul.Lowry.PhD@gmail.com; greg.moody@unlv.edu;;;james.eric.gaskin@gmail.com; galletta@katz.pitt.edu;;;shumpherys@wtamu.edu; jordy.barlow@gmail.com; davewilsonphd@gmail.com	+	;;;;		City University of Hong Kong UCG [7200256]	;;We appreciate the partial funding for this project from City University;;of Hong Kong UCG Grant # 7200256. We are indebted to Detmar Straub, to;;the associate editor, and to the reviewers for their rigorous oversight;;and feedback that resulted in a much improved manuscript. We appreciate;;reviews and feedback on previous versions of this work from Ritu;;Agarwal, Joey George, Mike Denny, Laura …	290KX		;;RESEARCH PRODUCTIVITY; H-INDEX; CAREER SUCCESS; INFLUENTIAL JOURNALS;;;RESEARCH PERFORMANCE; COERCIVE CITATION; NETWORK ANALYSIS; MANAGEMENT;;;BUSINESS; RANKING	4	MIS QUART	MIS Q.	English		102	Lowry, Paul/0000-0002-0187-5808	;;UNIV MINNESOTA-SCH MANAGEMENT 271 19TH AVE SOUTH, MINNEAPOLIS, MN 55455;;USA	DEC	41	MINNEAPOLIS		J	SOC INFORM MANAGE-MIS RES CENT	2013	Lowry, Paul/A-2790-2008	Lowry, PB (reprint author), City Univ Hong Kong, Coll Business, Dept Informat Syst, Hong Kong, Hong Kong, Peoples R China.	;;Computer Science; Information Science & Library Science; Business &;;Economics			0276-7783	MIS QUARTERLY
A00299	In this paper, we seek to determine whether a typical social media platform, Wikipedia, improves the information environment for investors in the financial market. Our theoretical lens leads us to expect that information aggregation about public companies on Wikipedia may influence how management's voluntary information disclosure reacts to market uncertainty with respect to investors' informatio…	;;Xu, Sean Xin;;Zhang, Xiaoquan (Michael)		;;Xu, SX;;Zhang, XQ			1043							;;Social media; Wikipedia; information environment; financial market;;;management disclosure; information aggregation		Article		xuxin@sem.tsinghua.edu.cn; zhang@ust.hk	+	;;;;		;;Program for New Century Excellent Talents in University [NCET-10-0508];;;National Natural Science Foundation of China [70890080, 71001056]; Hong;;Kong Research Grant Council; HKUST [GRF 647311, GRF 645211,;;RPC07/08.BM16, DAG_S09/10.BM03]	;;We thank the senior editor, the associate editor, and the two anonymous;;reviewers for their constructive feedbacks, which enabled us to improve;;the paper significantly. We appreciate the suggestions that we received;;from Kalok Chan, Eric Clemons, Sudipto Dasgupta, Alok Gupta, Chia-Chun;;Hsieh, Kirill Novoselov, Mike So, Feng (Alex) Tian, Bruce Weber, Hong;;Xu, Mingshan Zhang, Yong Zhang, Fen…	290KX		;;EARNINGS FORECASTS; VOLUNTARY DISCLOSURE; ONLINE COMMUNITIES; MEDIA;;BIAS; KNOWLEDGE CONTRIBUTION; CORPORATE DISCLOSURE; EMPIRICAL-ANALYSIS;;;SYSTEMS RESEARCH; FIRM VISIBILITY; STOCK-MARKET	4	MIS QUART	MIS Q.	English		116		;;UNIV MINNESOTA-SCH MANAGEMENT 271 19TH AVE SOUTH, MINNEAPOLIS, MN 55455;;USA	DEC	36	MINNEAPOLIS		J	SOC INFORM MANAGE-MIS RES CENT	2013		Xu, SX (reprint author), Tsinghua Univ, Sch Econ & Management, Beijing 100084, Peoples R China.	;;Computer Science; Information Science & Library Science; Business &;;Economics			0276-7783	MIS QUARTERLY
A00300	;;Privacy has been an enduring concern associated with commercial information technology ( IT) applications, in particular regarding the issue of personalization. IT-enabled personalization, while potentially making the user computing experience more gratifying, often relies heavily on the user's personal information to deliver individualized services, which raises the user's privacy concerns. We…	;;Sutanto, Juliana;;Palme, Elia;;Tan, Chuan-Hoo;;Phang, Chee Wei		;;Sutanto, J;;Palme, E;;Tan, CH;;Phang, CW			1141							;;Personalization-privacy paradox; mobile advertising applications; uses;;and gratification; information boundary theory		Article		;;jsutanto@ethz.ch; elia.palme@newscron.com; ch.tan@cityu.edu.hk;;;phangcw@fudan.edu.cn	+	;;;;		;;National Natural Science Foundation of China [71102018]; Research Grants;;Council of the Hong Kong Special Administrative Region, China [149810];;;Research Grants Council of the Hong Kong Special Administrative Region,;;China (City University of Hong Kong) [9041612]; Sino-Swiss Science and;;Technology Cooperation (SSSTC), ETHZ Global [IP 14-092009]	;;The work described in this paper was supported by a grant from the;;National Natural Science Foundation of China (Grant No. 71102018), a;;grant from the Research Grants Council of the Hong Kong Special;;Administrative Region, China (Project No. 149810 (City University of;;Hong Kong No. 9041612)), and a grant from the Sino-Swiss Science and;;Technology Cooperation (SSSTC), ETHZ Global (Project N…	290KX		;;INFORMATION PRIVACY; INTERNET USERS; MEDIA; MODEL; WEB; GRATIFICATIONS;;;TECHNOLOGY; WILLINGNESS; DISCLOSURE; LIKELIHOOD	4	MIS QUART	MIS Q.	English		79		;;UNIV MINNESOTA-SCH MANAGEMENT 271 19TH AVE SOUTH, MINNEAPOLIS, MN 55455;;USA	DEC	29	MINNEAPOLIS		J	SOC INFORM MANAGE-MIS RES CENT	2013	Tan, Chuan-Hoo/G-9681-2012	Phang, CW (reprint author), Fudan Univ, Dept Informat Management & Informat Syst, 670 Guoshun Rd, Shanghai 200433, Peoples R China.	;;Computer Science; Information Science & Library Science; Business &;;Economics			0276-7783	MIS QUARTERLY
A00301	;;Protecting information from a variety of security threats is a daunting organizational activity. Organization managers must recognize the roles that organization insiders have in protecting information resources rather than solely relying upon technology to provide this protection. Unfortunately, compared to negative insider behaviors, the extant literature provides sparse coverage of beneficia…	;;Posey, Clay;;Roberts, Tom L.;;Lowry, Paul Benjamin;;Bennett, Rebecca J.;;Courtney, James F.		;;Posey, C;;Roberts, TL;;Lowry, PB;;Bennett, RJ;;Courtney, JF			1189							;;Protection-motivated behaviors; behavioral information security;;;systematics; theory of diversity; multidimensional scaling; cluster;;analysis; taxonomy		Article		;;cposey@cba.ua.edu; troberts@latech.edu; paul.lowry.phd@gmail.com;;;rbennett@latech.edu; courtney@latech.edu	+	;;;;		;;U.S. Department of Defense Personnel Security Research Center (PERSEREC);;in Monterey, CA [BAA 04-01-MT-FH]; Hong Kong Research Grants Council;;General Research Fund (GRF) [147712]	;;The authors would like to express their sincere appreciation for the;;primary funding provided by the U.S. Department of Defense Personnel;;Security Research Center (PERSEREC) in Monterey, CA, under BAA;;04-01-MT-FH. We also appreciate partial funding from the Hong Kong;;Research Grants Council General Research Fund (GRF) Grant # 147712. The;;content of this manuscript does not necessarily refl…	290KX		;;SECURITY POLICY COMPLIANCE; GENERAL ATTITUDES; COMPUTER CRIME;;;EMPIRICAL-TEST; FEAR APPEALS; MANAGEMENT; MODEL; ANTECEDENTS;;;PERSPECTIVE; DETERRENCE	4	MIS QUART	MIS Q.	English		138	Lowry, Paul/0000-0002-0187-5808	;;UNIV MINNESOTA-SCH MANAGEMENT 271 19TH AVE SOUTH, MINNEAPOLIS, MN 55455;;USA	DEC	31	MINNEAPOLIS		J	SOC INFORM MANAGE-MIS RES CENT	2013	Lowry, Paul/A-2790-2008	Posey, C (reprint author), Univ Alabama, Culverhouse Coll Commerce & Business Adm, Dept Informat Syst Stat & Management Sci, Tuscaloosa, AL 35487 USA.	;;Computer Science; Information Science & Library Science; Business &;;Economics			0276-7783	MIS QUARTERLY
A00302	Some recent studies have illustrated a positive relationship between social media use and political participation among young people. Researchers, however, have operationalized social media usage differently. This article adopts a multidimensional approach to the study of the impact of social media. Focusing on Facebook (FB), the most widely utilized social networking site in Hong Kong, this stud…	;;Tang, Gary;;Lee, Francis L. F.		;;Tang, G;;Lee, FLF			763							;;social media; political participation; multidimensional approach;;;network structural heterogeneity; network size	10.1177/0894439313490625	Article		garytangky@cuhk.edu.hk; francis_lee@cuhk.edu.hk	773	;;;;		Research Grant Council of the Hong Kong government [CUHK449011]	;;The author(s) disclosed receipt of the following financial support for;;the research, authorship, and/or publication of this article: This;;research article is supported by a General Research Fund grant offered;;to the second author of the article by the Research Grant Council of the;;Hong Kong government (project no.: CUHK449011).	289DT		CIVIC ENGAGEMENT; SOCIAL MEDIA; ONLINE; CITIZENSHIP; SITES; NEWS	6	SOC SCI COMPUT REV	Soc. Sci. Comput. Rev.	English		22		2455 TELLER RD, THOUSAND OAKS, CA 91320 USA	DEC	11	THOUSAND OAKS		J	SAGE PUBLICATIONS INC	2013		Tang, G (reprint author), Chinese Univ Hong Kong, Sch Journalism & Commun, Humanities Bldg,Room 415, Hong Kong, Hong Kong, Peoples R China.	;;Computer Science; Information Science & Library Science; Social Sciences;;Other Topics			0894-4393	SOCIAL SCIENCE COMPUTER REVIEW
A00303	Community (or village) characteristics have received growing attention as researchers have sought factors affecting health. This study examines the association between a variety of environmental, economic, and social village characteristics and health of Chinese older rural adults with health measured in terms of physical limitations. The Chinese Health and Retirement Longitudinal Survey (CHARLS)…	;;Yeatts, Dale E.;;Pei, Xiaomei;;Cready, Cynthia M.;;Shen, Yuying;;Luo, Hao;;Tan, Junxin		;;Yeatts, DE;;Pei, XM;;Cready, CM;;Shen, YY;;Luo, H;;Tan, JX			71							;;China; Health; Elderly; Sustainable community development; Environment;;;IADLs; Rural; Social network	10.1016/j.socscimed.2013.08.041	Article		Yeatts@unt.edu	78	;;;;				283UX		;;AIR-POLLUTION; ELDERLY POPULATION; INCOME INEQUALITY; DAILY MORTALITY;;;NEIGHBORHOOD; COMMUNITY; EDUCATION; SUPPORT; CONTEXT; SYSTEM		SOC SCI MED	Soc. Sci. Med.	English		64		THE BOULEVARD, LANGFORD LANE, KIDLINGTON, OXFORD OX5 1GB, ENGLAND	DEC	8	OXFORD		J	PERGAMON-ELSEVIER SCIENCE LTD	2013		Yeatts, DE (reprint author), Univ N Texas, Dept Sociol, Box 311157, Denton, TX 76203 USA.	Public, Environmental & Occupational Health; Biomedical Social Sciences			0277-9536	SOCIAL SCIENCE & MEDICINE
A00304	One of the features of advanced life sciences research in recent years has been its internationalisation, with countries such as China and South Korea considered 'emerging biotech' locations. As a result, cross-continental collaborations are becoming common generating moves towards ethical and legal standardisation under the rubric of 'global bioethics'. Such a 'global', 'Western' or 'universal' …	;;Wahlberg, Ayo;;Rehmann-Sutter, Christoph;;Sleeboom-Faulkner, Margaret;;Lu, Guangxiu;;Doering, Ole;;Cong, Yali;;Laska-Formejster, Alicja;;He, Jing;;Chen, Haidan;;Gottweis, Herbert;;Rose, Nikolas		;;Wahlberg, A;;Rehmann-Sutter, C;;Sleeboom-Faulkner, M;;Lu, GX;;Doring, O;;Cong, YL;;Laska-Formejster, A;;He, J;;Chen, HD;;Gottweis, H;;Rose, N			293							;;Global bioethics; Ethical governance; Regulation; Research;;collaboration; Informed consent; People's Republic of China; Europe	10.1016/j.socscimed.2013.03.041	Article		ayo.wahlberg@anthro.ku.dk	300	;;;;		European Commission; UK Medical Research Council; Wellcome Trust	;;We would like to acknowledge the financial support of the European;;Commission's Sixth Framework Programme (FP6), the UK Medical Research;;Council and the Wellcome Trust. We would also like to thank all BIONET;;partners, BIONET exchange students and participants in our workshops and;;conferences for their engagement with BIONET and the frank and open;;dialogue that formed the basis of our findi…	283UX		;;CLINICAL RESEARCH; DEVELOPING-COUNTRIES; INFORMED-CONSENT; COMMUNITY;;;EVEN; HIV		SOC SCI MED	Soc. Sci. Med.	English		39		THE BOULEVARD, LANGFORD LANE, KIDLINGTON, OXFORD OX5 1GB, ENGLAND	DEC	8	OXFORD		J	PERGAMON-ELSEVIER SCIENCE LTD	2013		Wahlberg, A (reprint author), Univ Copenhagen, Dept Anthropol, Oster Farimagsgade 5, DK-1353 Copenhagen, Denmark.	Public, Environmental & Occupational Health; Biomedical Social Sciences			0277-9536	SOCIAL SCIENCE & MEDICINE
A00305	This study applies Narayan and Popp's () unit-root test with two endogenous breaks to assess the validity of long-run real interest rate parity (RIRP) via investigating the non-stationary properties of the real interest rate convergence relative to South Africa for ten African countries. This method has been proven to be more powerful than the other unit root models with two breaks (Narayan and P…	;;Su, Chi-Wei;;Chang, Hsu-Ling;;Liu, Yan		;;Su, CW;;Chang, HL;;Liu, Y			478								10.1111/1467-8268.12043	Article		liuyan_ouc@126.com	484	;;;;				284LM		;;UNIT-ROOT HYPOTHESIS; PURCHASING POWER PARITY; OIL-PRICE SHOCK;;;TIME-SERIES; EXCHANGE-RATE; UNKNOWN TIME; GREAT CRASH; TESTS;;;NONLINEARITIES; DIFFERENTIALS	4	AFR DEV REV	Afr. Dev. Rev.	English		27		111 RIVER ST, HOBOKEN 07030-5774, NJ USA	DEC	7	HOBOKEN		J	WILEY-BLACKWELL	2013		Liu, Y (reprint author), Ocean Univ China, Dept Finance, 238 Songling Rd, Qingdao 266100, Shandong, Peoples R China.	Public Administration			1017-6772	AFRICAN DEVELOPMENT REVIEW-REVUE AFRICAINE DE DEVELOPPEMENT
A00306	THIS ARTICLE IS INTENDED to provide a timely outline of early childhood education (ECE) provision and policy in China. It gives a commentary on ECE policy in China and argues for new policy directions. Since 2010, the Chinese government has launched a comprehensive set of education policies designed to promote equitable access to ECE and improvements in the quality. These policies arose as a poli…	Qian, Yu		Qian, Y			59									Article			65	;;;;				286BG		BENEFITS; SYSTEM; YOUNG	4	AUST J EARLY CHILD	Aust. J. Early Child.	English		32		PO BOX 7105, WATSON, ACT 2602, AUSTRALIA	DEC	7	WATSON		J	EARLY CHILDHOOD AUSTRALIA INC	2013		Qian, Y (reprint author), E China Normal Univ, Early Childhood Educ Dept, Shanghai, Peoples R China.	Education & Educational Research			0312-5033	AUSTRALASIAN JOURNAL OF EARLY CHILDHOOD
A00307	;;Objective To investigate the co-effect of Demand-control-support (DCS) model and Effort-reward Imbalance (ERI) model on the risk estimation of depression in humans in comparison with the effects when they are used respectively.;;Methods A total of 3 632 males and 1 706 females from 13 factories and companies in Henan province were recruited in this cross-sectional study. Perceived job stress wa…	;;Yu Shan Fa;;Nakata, Akinori;;Gu Gui Zhen;;Swanson, Naomi G.;;Zhou Wen Hui;;He Li Hua;;Wang Sheng		;;Yu, SF;;Nakata, A;;Gu, GZ;;Swanson, NG;;Zhou, WH;;He, LH;;Wang, S			962							;;Depression; Work-related stress; Demand-control-support; Effort-reward;;imbalance	10.3967/bes2013.031	Article		chinas-tress@sina.com	971	;;;;		;;Henan Provincial Health Science and Technology Key Projects [201001009];;;National Science and Technology Infrastructure Program, China [2006BA;;I06B 08]	;;This research was funded by Henan Provincial Health Science and;;Technology Key Projects (201001009) and National Science and Technology;;Infrastructure Program (2006BA I06B 08), China.	286PB		;;PSYCHOSOCIAL WORK-ENVIRONMENT; JOB-STRESS MODELS; COLLAR WORKERS;;;MENTAL-HEALTH; SOCIAL-CLASS; SYMPTOMS; COMPLEMENTARY; EMPLOYEES; STRAIN;;;ASSOCIATION	12	BIOMED ENVIRON SCI	Biomed. Environ. Sci.	English		39		155 CHANGBAI RD, CHANGPING DISTRICT, BEIJING, 102206, PEOPLES R CHINA	DEC	10	BEIJING		J	CHINESE CENTER DISEASE CONTROL & PREVENTION	2013		Yu, SF (reprint author), Henan Prov Inst Occupat Hlth, Zhengzhou 450052, Henan, Peoples R China.	;;Environmental Sciences & Ecology; Public, Environmental & Occupational;;Health			0895-3988	BIOMEDICAL AND ENVIRONMENTAL SCIENCES
A00308	;;Background: Responsiveness of health care services in low and middle income countries has been given little attention. Despite being introduced over a decade ago in many developing countries, national health insurance schemes have yet to be evaluated in terms of responsiveness of health care services. Although this responsiveness has been evaluated in many developed countries, it has rarely bee…	;;Mohammed, Shafiu;;Bermejo, Justo Lorenzo;;Souares, Aurelia;;Sauerborn, Rainer;;Dong, Hengjin	502	;;Mohammed, S;;Bermejo, JL;;Souares, A;;Sauerborn, R;;Dong, HJ										;;Health insurance; Users; Health care services; Responsiveness; Nigeria;;;Performance	10.1186/1472-6963-13-502	Article		donghj@zju.edu.cn		;;;;		;;Graduate Academy Excellence-Initiatives; Heidelberg University;;;DAAD-STIBET	;;This work was supported as part of a doctoral dissertation, by The;;Graduate Academy Excellence-Initiatives, Heidelberg University and;;DAAD-STIBET grants.	285CT		;;PERFORMANCE; SYSTEMS; SATISFACTION; PERCEPTIONS; EXPERIENCES; QUALITY;;;LESSONS; AFRICA		BMC HEALTH SERV RES	BMC Health Serv. Res.	English		33		236 GRAYS INN RD, FLOOR 6, LONDON WC1X 8HL, ENGLAND	41974	13	LONDON		J	BIOMED CENTRAL LTD	2013		Dong, HJ (reprint author), Heidelberg Univ, Fac Med, Inst Publ Hlth, Heidelberg, Germany.	Health Care Sciences & Services			1472-6963	BMC HEALTH SERVICES RESEARCH
A00309	Endeavouring to explore how social work can develop under the tensions between the core values of the profession and the socialist political doctrines in China, this paper applies the moral resources and political capital perspective to examine the growth of a social service organisation, G.A.S., in CityJ. The findings indicate that self-chosen moral resource-I, societal-recognised moral resource…	Xu, Ying		Xu, Y			1589							;;Moral resources; political capital; development of social work;;;professional service; China	10.1093/bjsw/bcs070	Article		xuying@cuhk.edu.hk	1610	;;;;				280SS		HONG-KONG; EDUCATION; SERVICE; COMMITMENT; DISCOURSE; WELFARE	8	BRIT J SOC WORK	Br. J. Soc. Work	English		61		GREAT CLARENDON ST, OXFORD OX2 6DP, ENGLAND	DEC	22	OXFORD		J	OXFORD UNIV PRESS	2013		Xu, Y (reprint author), Chinese Univ Hong Kong, Dept Social Work, TC Cheng Bldg, Shatin, Hong Kong, Peoples R China.	Social Work			0045-3102	BRITISH JOURNAL OF SOCIAL WORK
A00310	In 1777, Emperor Qianlong issued an edict to the Historiography Bureau, ordering the compilation of the Biographies of Twice-Serving Ministers (Erchen zhuan) to condemn the former Ming officials who collaborated with the newly established Qing dynasty during the Ming-Qing transition. However, an edict in 1791 removed the biographies of the unappointed Ming degree holders and trainees from the his…	Chan, Wing-ming		Chan, WM			753							erchen; Erchen zhuan; Wu Weihua; Liang Qingbiao; Zhang Duan		Article			784	;;;;				285SY				B INST HIST PHILOL	Bull. Inst. Hist. Philol. Acad. Sin.	Chinese		5		EDITORIAL COMMITTEE, TAIPEI 11529, TAIWAN	DEC	32	TAIPEI	4	J	ACAD SINICA-INST HISTORY PHILOLOGY	2013		Chan, WM (reprint author), Univ Hong Kong, Sch Chinese, Hong Kong, Hong Kong, Peoples R China.	History; Asian Studies; Linguistics			1012-4195	BULLETIN OF THE INSTITUTE OF HISTORY AND PHILOLOGY ACADEMIA SINICA
A00311	Article 2.1 (only the part containing the national treatment obligation) of the Agreement on Technical Barriers to Trade (TBT) has been interpreted and applied for the first time in three recent TBT disputes since the establishment of the World Trade Organization. This article will illustrate that the interpretive approach adopted by the Appellate Body, however, created a complicated relationship…	Jia, Henry Hailong		Jia, HH			723								10.1093/chinesejil/jmt040	Article		jiahailong08@gmail.com	769	;;;;				281WP		NECESSITY; GATT	4	CHIN J INT LAW	Chin. J. Int. Law	English		46		GREAT CLARENDON ST, OXFORD OX2 6DP, ENGLAND	DEC	47	OXFORD		J	OXFORD UNIV PRESS	2013		Jia, HH (reprint author), Univ Illinois, Champaign, IL 61820 USA.	International Relations; Government & Law			1540-1650	CHINESE JOURNAL OF INTERNATIONAL LAW
A00312	The advisory opinion rendered by the Seabed Disputes Chamber of the International Tribunal for the Law of the Sea in the Responsibilities and Obligations of the Sponsoring States case clarified some important issues concerning the deep seabed mining regime of the Convention on the Law of the Sea. Particularly, the obligation to ensure undertaken by the sponsoring State is an obligation of due dil…	Gao, Jianjun		Gao, JJ			771								10.1093/chinesejil/jmt037	Article		gaojianjun@yahoo.com	786	;;;;				281WP			4	CHIN J INT LAW	Chin. J. Int. Law	English		3		GREAT CLARENDON ST, OXFORD OX2 6DP, ENGLAND	DEC	16	OXFORD		J	OXFORD UNIV PRESS	2013		Gao, JJ (reprint author), China Univ Polit Sci & Law, Fac Int Law, Beijing, Peoples R China.	International Relations; Government & Law			1540-1650	CHINESE JOURNAL OF INTERNATIONAL LAW
A00313	Certain developed countries are exploring the possibility of imposing border measures to address the issues of competitive disadvantage and carbon leakage caused by asymmetric climate change policies in different countries. This article examines whether these border measures can satisfy the chapeau requirement(1) under Article XX of GATT, which is probably the most significant procedural hurdle u…	Zhao, Jun		Zhao, J			809								10.1093/chinesejil/jmt029	Article			842	;;;;				281WP		CLIMATE-CHANGE; WTO; LAW	4	CHIN J INT LAW	Chin. J. Int. Law	English		118		GREAT CLARENDON ST, OXFORD OX2 6DP, ENGLAND	DEC	34	OXFORD		J	OXFORD UNIV PRESS	2013		Zhao, J (reprint author), Zhejiang Univ, Guanghua Law Sch, Hangzhou, Zhejiang, Peoples R China.	International Relations; Government & Law			1540-1650	CHINESE JOURNAL OF INTERNATIONAL LAW
A00314		Yao, Huang		Yao, H			843								10.1093/chinesejil/jmt038	Book Review		lpshyao@mail.sysu.edu.cn	845	;;;;				281WP			4	CHIN J INT LAW	Chin. J. Int. Law	English		2		GREAT CLARENDON ST, OXFORD OX2 6DP, ENGLAND	DEC	3	OXFORD		J	OXFORD UNIV PRESS	2013		Yao, H (reprint author), Sun Yat Sen Univ, Sch Law, Guangzhou, Guangdong, Peoples R China.	International Relations; Government & Law			1540-1650	CHINESE JOURNAL OF INTERNATIONAL LAW
A00315	;;Objective: To investigate the long-term effects of motivational interviewing on clinical outcomes, psychological outcomes, health-related quality of life among cardiac rehabilitation patients with poor motivation.;;Design: A randomized controlled trial with blind data collectors.;;Setting: Cardiac rehabilitation centre.;;Subjects: A total of 146 cardiac rehabilitation patients with poor motivat…	;;Chair, Sek Ying;;Chan, Sally Wai-Chi;;Thompson, David R.;;Leung, Kei-Pui;;Ng, Samuel Ka-Chiu;;Choi, Kai Chow		;;Chair, SY;;Chan, SWC;;Thompson, DR;;Leung, KP;;Ng, SKC;;Choi, KC			1107							;;Cardiac rehabilitation; coronary heart disease; motivational;;interviewing; randomized controlled trial	10.1177/0269215513490527	Article		sychair@cuhk.edu.hk	1117	;;;;		Health and Health services Research Fund, Hong Kong [05060481]	;;The work was supported by the Health and Health services Research Fund,;;Hong Kong (grant number 05060481).	286SW		;;CHRONIC HEART-FAILURE; PHYSICAL-ACTIVITY; INTERVENTION; PEOPLE; SCALE;;;CARE	12	CLIN REHABIL	Clin. Rehabil.	English		17		1 OLIVERS YARD, 55 CITY ROAD, LONDON EC1Y 1SP, ENGLAND	DEC	11	LONDON		J	SAGE PUBLICATIONS LTD	2013		Chair, SY (reprint author), Chinese Univ Hong Kong, Nethersole Sch Nursing, Room 825,8-F Esther Lee Bldg, Shatin 852, Hong Kong, Peoples R China.	Rehabilitation			0269-2155	CLINICAL REHABILITATION
A00316	This column provides a country by country analysis of the latest legal developments, cases and issues relevant to the IT, media and telecommunications' industries in key jurisdictions across the Asia Pacific region. The articles appearing in this column are intended to serve as 'alerts' and are not submitted as detailed analyses of cases or legal developments. (C) 2013 Gabriela Kennedy. Published…	Kennedy, Gabriela		Kennedy, G			729							;;Asia-Pacific; IT/Information technology; Communications; Internet;;;Media; Law	10.1016/j.clsr.2013.09.010	News Item			735	;;;;				285VQ			6	COMPUT LAW SECUR REV	Comput. Law Secur. Rev.	English		0		;;OXFORD FULFILLMENT CENTRE THE BOULEVARD, LANGFORD LANE, KIDLINGTON,;;OXFORD OX5 1GB, OXON, ENGLAND	DEC	7	OXFORD		J	ELSEVIER ADVANCED TECHNOLOGY	2013		Kennedy, G (reprint author), Mayer Brown JSM, Hong Kong, Hong Kong, Peoples R China.	Government & Law			0267-3649	COMPUTER LAW & SECURITY REVIEW
A00317	In the enterprise system market, software quality is often unobservable at the contracting stage between the vendor and the customer. Two factors complicate the vendor's derision to invest in software quality. First, as a required part of the transaction, services such as installation and maintenance are bundled with the product. Second, the vendor's cost of delivering these services is directly …	;;Cho, Wooje;;Subramanyam, Ramanath;;Xia, Mu		;;Cho, W;;Subramanyam, R;;Xia, M			27							Enterprise systems; Software quality; Game theory; Synergy	10.1016/j.dss.2013.04.005	Article		shamux@gmail.com	36	;;;;		;;National Natural Science Foundation of China [91218301]; Financial;;Service Innovation Team Development Project at Southwestern University;;of Finance and Economics	;;The third author acknowledges financial support by the Major Program of;;the National Natural Science Foundation of China (Grant Number:;;91218301), as well as Financial Service Innovation Team Development;;Project at Southwestern University of Finance and Economics (2012).	280BZ		PROPERTY-RIGHTS; PRODUCTS; DESIGN; FIRM		DECIS SUPPORT SYST	Decis. Support Syst.	English		17		PO BOX 211, 1000 AE AMSTERDAM, NETHERLANDS	DEC	10	AMSTERDAM		J	ELSEVIER SCIENCE BV	2013		Xia, M (reprint author), Southwestern Univ Finance & Econ, Key Lab Financial Intelligence & Financial Engn, Chengdu, Sichuan, Peoples R China.	Computer Science; Operations Research & Management Science			0167-9236	DECISION SUPPORT SYSTEMS
A00318	This research reasons that human capital, that is, knowledge, skills, experience, abilities, and capacities possessed by employees, plays a vital role in the adoption of open source software CUSS) by organizations. Based on the survey responses of 104 OSS-adopting organizations and 111 non-adopting organizations in China, a discriminant analysis of organizations' OSS adoption behaviors was conduc…	;;Li, Yan;;Tan, Chuan-Hoo;;Yang, Xue		;;Li, Y;;Tan, CH;;Yang, X			56							;;Open source software; Technology adoption; Human capital; Discriminant;;analysis	10.1016/j.dss.2013.05.006	Article		liyan@essec.edu; ch.tan@cityu.edu.hk; yangxue@nju.edu.cn	62	;;;;				280BZ		;;COMPETITIVE ADVANTAGE; RESOURCE; BUSINESS; INNOVATIONS; DIFFUSION;;;SYSTEMS		DECIS SUPPORT SYST	Decis. Support Syst.	English		45		PO BOX 211, 1000 AE AMSTERDAM, NETHERLANDS	DEC	7	AMSTERDAM		J	ELSEVIER SCIENCE BV	2013	Tan, Chuan-Hoo/G-9681-2012	Yang, X (reprint author), Nanjing Univ, Sch Business Management, Dept Mkt & Elect Business, Hankou Rd 22, Nanjing 210093, Jiangsu, Peoples R China.	Computer Science; Operations Research & Management Science			0167-9236	DECISION SUPPORT SYSTEMS
A00319	Fads, from a cognitive perspective, are caused by informational cascades. It describes a situation in which people observe the actions of others and then make the same choice, regardless of their own information. Previous research on informational cascades suggested that behavioral conformity prevents information aggregation, and therefore the stability of an informational cascade need not increa…	;;Hu, Hao;;Lai, Vincent S.		;;Hu, H;;Lai, VS			83							Herd; Informational cascade; Information aggregation; Stability	10.1016/j.dss.2013.05.001	Article		huhao@baf.cuhk.edu.hk; vslai@cuhk.edu.hk	91	;;;;				280BZ		INFORMATIONAL CASCADES; HERD BEHAVIOR; ADOPTION; MODEL		DECIS SUPPORT SYST	Decis. Support Syst.	English		24		PO BOX 211, 1000 AE AMSTERDAM, NETHERLANDS	DEC	9	AMSTERDAM		J	ELSEVIER SCIENCE BV	2013		Hu, H (reprint author), Chinese Univ Hong Kong, Dept Decis Sci & Managerial Econ, Hong Kong, Hong Kong, Peoples R China.	Computer Science; Operations Research & Management Science			0167-9236	DECISION SUPPORT SYSTEMS
A00320	This study investigates the moderating effect of recommendation source credibility on the causal relationships between informational factors and recommendation credibility, as well as its moderating effect on the causal relationship between recommendation credibility and recommendation adoption. Using data from 199 responses from a leading online consumer discussion forum in China, we find that r…	;;Luo, Chuan;;Luo, Xin (Robert);;Schatzberg, Laurie;;Sia, Choon Ling		;;Luo, C;;Luo, X;;Schatzberg, L;;Sia, CL			92							;;Recommendation persuasiveness; Recommendation completeness; Source;;credibility; Recommendation credibility	10.1016/j.dss.2013.05.005	Article		luochuan@swufe.edu.cn	102	;;;;		;;National Social Science Foundation [11AZD077]; Laboratory for Financial;;Intelligence and Financial Engineering, Southwestern University of;;Finance and Economics, China	;;This work was supported in part by a State Key Research Project from the;;National Social Science Foundation (grant no. 11AZD077) and a Research;;Project from the Laboratory for Financial Intelligence and Financial;;Engineering, Southwestern University of Finance and Economics, China.	280BZ		WORD-OF-MOUTH; OPINION CHANGE; WEB; INTERNET; REVIEWS; MODELS		DECIS SUPPORT SYST	Decis. Support Syst.	English		34		PO BOX 211, 1000 AE AMSTERDAM, NETHERLANDS	DEC	11	AMSTERDAM		J	ELSEVIER SCIENCE BV	2013		Luo, C (reprint author), Southwestern Univ Finance & Econ, Lab Financial Intelligence & Financial Engn, Chengdu, Peoples R China.	Computer Science; Operations Research & Management Science			0167-9236	DECISION SUPPORT SYSTEMS
A00321	Advances in network infrastructure and computing technology have made 3D virtual environment increasingly popular and less costly. Many education institutions have shown interests in its application in teaching and learning activities. In this project, we evaluated how the 3D virtual environment can facilitate students in achieving learning outcomes. To provide students with learning experience i…	;;Chau, Michael;;Wong, Ada;;Wang, Minhong;;Lai, Songnia;;Chan, Kristal W. Y.;;Li, Tim M. H.;;Chu, Debbie;;Chan, Ian K. W.;;Sung, Wai-ki		;;Chau, M;;Wong, A;;Wang, MH;;Lai, SN;;Chan, KWY;;Li, TMH;;Chu, D;;Chan, IKW;;Sung, WK			115							3D virtual environments; Constructivist learning; Outcome-based learning	10.1016/j.dss.2013.05.009	Article		;;mchau@business.hku.hk; isada98@gmail.com; magwang@hku.hk;;;songnialai@gmail.com; kristal@connect.hku.hk; h0716269@graduate.hku.hk;;;debbie.chu@hku.hk; ikwchan@hku.hk; h9508355@connect.hku.hk	121	;;;;		;;"Exploring the Use of Three-Dimensional Virtual Worlds for Teaching and;;Learning Activities," HKU Earmarked Teaching Development Grant;;[10100316]	;;The project was supported in part by the following grant: "Exploring the;;Use of Three-Dimensional Virtual Worlds for Teaching and Learning;;Activities," HKU Earmarked Teaching Development Grant (project #;;10100316).	280BZ		EDUCATION		DECIS SUPPORT SYST	Decis. Support Syst.	English		31		PO BOX 211, 1000 AE AMSTERDAM, NETHERLANDS	DEC	7	AMSTERDAM		J	ELSEVIER SCIENCE BV	2013		Chau, M (reprint author), Univ Hong Kong, Sch Business, Fac Business & Econ, Hong Kong, Hong Kong, Peoples R China.	Computer Science; Operations Research & Management Science			0167-9236	DECISION SUPPORT SYSTEMS
A00322	Information sharing has been known to be crucial in supply chain management. Prior empirical finding reveals that suppliers in practice tend to help their trading partners improve forecast accuracy. This paper examines this issue and explores the up-down (from an upstream supplier to a downstream retailer) strategic information sharing issues in a two-echelon supply chain. We first model a supply…	;;Choi, Tsan-Ming;;Li, Jian;;Wei, Ying		;;Choi, TM;;Li, J;;Wei, Y			131							Supply chain management; Forecast updating; Returns policy	10.1016/j.dss.2013.05.011	Article		jason.choi@polyu.edu.hk; lijian@mail.buct.edu.cn; yingwei@jnu.edu.cn	139	;;;;		;;RGC (HK) General Research Funding - PolyU [5420/10H]; National Natural;;Science Foundation of China [71101063]	;;We sincerely thank the chief editor Professor James Marsden, the area;;editor, and the anonymous reviewers for their constructive and helpful;;comments which led to major improvement of this paper. This research is;;partially supported by RGC (HK) General Research Funding - PolyU;;5420/10H, and the National Natural Science Foundation of China under;;Grant No. 71101063.	280BZ		;;CHAIN COORDINATION; INVENTORY PROBLEM; DEMAND FORECAST; QUICK RESPONSE;;;CONTRACTS; MODELS; IMPACT		DECIS SUPPORT SYST	Decis. Support Syst.	English		32		PO BOX 211, 1000 AE AMSTERDAM, NETHERLANDS	DEC	9	AMSTERDAM		J	ELSEVIER SCIENCE BV	2013		Choi, TM (reprint author), Hong Kong Polytech Univ, Business Div, Inst Text & Clothing, Kowloon, Hong Kong, Peoples R China.	Computer Science; Operations Research & Management Science			0167-9236	DECISION SUPPORT SYSTEMS
A00323	Merchants adopt web personalization technologies to offer product recommendations in the hope of influencing online users' decision making in a shopping process. Although there is a large body of research on the favorable effects of web personalization on influencing online users' decision making, it is often assumed that web personalization functions well. Only scant research examines the advers…	;;Chau, Patrick Y. K.;;Ho, Shuk Ying;;Ho, Kevin K. W.;;Yao, Yihong		;;Chau, PYK;;Ho, SY;;Ho, KKW;;Yao, YH			180							;;Web personalization; Malfunctioning; Competence distrust; Integrity;;distrust; Experiment	10.1016/j.dss.2013.05.023	Article		;;Pchau@business.hku.hk; Susanna.ho@anu.edu.au;;;Kevin.kai.wing.ho@gmail.com; hyyao@graduate.hku.hk	191	;;;;		Research Grants Council, Hong Kong [HKU741909H]	;;The study reported in this paper is funded by a research grant, General;;Research Fund for 2009/2010 (Project No. HKU741909H), Research Grants;;Council, Hong Kong.	280BZ		;;RECOMMENDATION AGENTS; WEB PERSONALIZATION; TRUST; ADOPTION; COMMERCE;;;IMPACT; MODEL; VIEW		DECIS SUPPORT SYST	Decis. Support Syst.	English		48	Ho, Kai Wing/0000-0003-1304-0573	PO BOX 211, 1000 AE AMSTERDAM, NETHERLANDS	DEC	12	AMSTERDAM		J	ELSEVIER SCIENCE BV	2013	Ho, Kai Wing/E-8297-2013	Chau, PYK (reprint author), Univ Hong Kong, Fac Business & Econ, Hong Kong, Hong Kong, Peoples R China.	Computer Science; Operations Research & Management Science			0167-9236	DECISION SUPPORT SYSTEMS
A00324	In e-commerce, online product reviews significantly influence the purchase decisions of buyers and the marketing strategies employed by vendors. However, the abundance of reviews and their uneven quality make distinguishing between useful and useless reviews difficult for potential customers, thereby diminishing the benefits of online review systems. To address this problem, we develop a semi-sup…	;;Zheng, Xiaolin;;Zhu, Shuai;;Lin, Zhangxi		;;Zheng, XL;;Zhu, S;;Lin, ZX			211							;;Online review; Review quality; Review mining; Semi-supervised learning;;;Social network	10.1016/j.dss.2013.06.002	Review		xlzheng@zju.edu.cn; zscs@zju.edu.cn; zhangxi.lin@ttu.edu	222	;;;;		;;National Key Technology RD Program [2012BAH16F02]; National Natural;;Science Foundation of China [61003254, 91218301]; Fundamental Research;;Funds for the Central Universities; Financial Service Innovation Team;;Development Project at Southwest University of Finance and Economics	;;This work was supported in part by the National Key Technology RD;;Program (No. 2012BAH16F02), the National Natural Science Foundation of;;China (Grant No. 61003254 and 91218301), and the Fundamental Research;;Funds for the Central Universities, as well as Financial Service;;Innovation Team Development Project at Southwest University of Finance;;and Economics (2012).	280BZ		PRODUCT REVIEWS; OPINION LEADERS; NETWORKS; DESIGN		DECIS SUPPORT SYST	Decis. Support Syst.	English		57		PO BOX 211, 1000 AE AMSTERDAM, NETHERLANDS	DEC	12	AMSTERDAM		J	ELSEVIER SCIENCE BV	2013		Zheng, XL (reprint author), Zhejiang Univ, Coll Comp Sci, 38 Zheda Rd, Hangzhou 310027, Zhejiang, Peoples R China.	Computer Science; Operations Research & Management Science			0167-9236	DECISION SUPPORT SYSTEMS
A00325	Personalized marketing via mobile devices, also known as Mobile Personalized Marketing (MPM), has become an increasingly important marketing tool because the ubiquity, interactivity and localization of mobile devices offers great potential for understanding customers' preferences and quickly advertising customized products or services. A tremendous challenge in MPM is to factor a mobile user's co…	;;Tang, Heng;;Liao, Stephen Shaoyi;;Sun, Sherry Xiaoyun		;;Tang, H;;Liao, SS;;Sun, SX			234							;;Multidimensional rule; Sequential rule; Activity prediction; Mobile;;Personalized Marketing; Data mining	10.1016/j.dss.2013.06.004	Article		hengtang@umac.mo; issliao@cityu.edu.hk; sherry.sun@cityu.edu.hk	246	;;;;		;;University of Macau [MYRG005(Y1-L1)-FBA12-TH]; National Natural Science;;Foundation of China [71090402, 71002064]	;;We would like to thank the anonymous reviewers for the constructive;;review. The comments are of great help in improving the manuscript. This;;research was mainly supported by grant numbered MYRG005(Y1-L1)-FBA12-TH;;of University of Macau. It is also supported by grants from National;;Natural Science Foundation of China (71090402 & 71002064).	280BZ		;;MINING SEQUENTIAL PATTERNS; REDUNDANT ASSOCIATION RULES; FREQUENT;;;SEQUENCES; INFORMATION; ALGORITHM; SELECTION; EPISODES; SYSTEMS; MODELS		DECIS SUPPORT SYST	Decis. Support Syst.	English		63		PO BOX 211, 1000 AE AMSTERDAM, NETHERLANDS	DEC	13	AMSTERDAM		J	ELSEVIER SCIENCE BV	2013		Tang, H (reprint author), Av Padre Tomas Pereira Taipa, Taipa, Macao, Peoples R China.	Computer Science; Operations Research & Management Science			0167-9236	DECISION SUPPORT SYSTEMS
A00326	This paper is concerned with online learning of the optimal auction mechanism for sponsored search in a bandit setting. Previous works take the click-through rates of ads to be fixed and known to the search engine and use this information to design optimal auction mechanism. However, the assumption is not practical since ads can only receive clicks when they are shown to users. To tackle this pro…	;;He, Di;;Chen, Wei;;Wang, Liwei;;Liu, Tie-Yan		;;He, D;;Chen, W;;Wang, LW;;Liu, TY			379							Armed bandit problem; Mechanism design; Online advertising	10.1016/j.dss.2013.07.004	Article		wanglw@cis.pku.edu.cn	386	;;;;		;;NSFC [61222307, 61075003]; MOE-Microsoft Laboratory of Statistics and;;Information Technology of Peking University	;;This work was supported by NSFC(61222307, 61075003) and a grant from;;MOE-Microsoft Laboratory of Statistics and Information Technology of;;Peking University. Part of this work was done when the first author;;visited Microsoft Research Asia.	280BZ				DECIS SUPPORT SYST	Decis. Support Syst.	English		19		PO BOX 211, 1000 AE AMSTERDAM, NETHERLANDS	DEC	8	AMSTERDAM		J	ELSEVIER SCIENCE BV	2013		Wang, LW (reprint author), Peking Univ, Sch Elect Engn & Comp Sci, MOE, Key Lab Machine Percept, Beijing 100871, Peoples R China.	Computer Science; Operations Research & Management Science			0167-9236	DECISION SUPPORT SYSTEMS
A00327	With rapid advances in e-commerce applications and technologies, finding the chance that a product falls into a consumer's consideration set after being inspected (i.e., consideration probability, CP) becomes an important issue of recommendation services and marketing strategies for both academia and practitioners. This paper proposes a novel business intelligence (BI) approach (namely, the two-s…	;;Wang, Hao;;Wei, Qiang;;Chen, Guoqing		;;Wang, H;;Wei, Q;;Chen, GQ			397							;;Electronic commerce; Business intelligence; Online marketing;;;Consideration probability; Collaborative filtering; Latent class model	10.1016/j.dss.2012.10.052	Article		;;wangh6.06@sem.tsinghua.edu.cn; weiq@sem.tsinghua.edu.cn;;;chengq@sem.tsinghua.edu.cn	405	;;;;		;;National Natural Science Foundation of China;;[70890080/71072015/71110107027]; Tsinghua University Initiative;;Scientific Research Program [20101081741]	;;The work was partially supported by the National Natural Science;;Foundation of China (70890080/71072015/71110107027) and the Tsinghua;;University Initiative Scientific Research Program (20101081741).	280BZ		;;CONSIDERATION SETS; CLICKSTREAM DATA; PANEL-DATA; RECOMMENDER SYSTEMS;;;INFORMATION SEARCH; ONLINE; BEHAVIOR; WEB; MODELS; STRATEGIES		DECIS SUPPORT SYST	Decis. Support Syst.	English		63		PO BOX 211, 1000 AE AMSTERDAM, NETHERLANDS	DEC	9	AMSTERDAM		J	ELSEVIER SCIENCE BV	2013		Wei, Q (reprint author), Tsinghua Univ, Sch Econ & Management, Beijing 100084, Peoples R China.	Computer Science; Operations Research & Management Science			0167-9236	DECISION SUPPORT SYSTEMS
A00328	The paper extends the Malmquist productivity index to establish a theoretical model to evaluate foreign direct investment (FDI) attractiveness. This model and its implementation mechanism consider cost efficiency and profit efficiency changes that represent the influence of price level on inputs and outputs respectively. Using data from China from 1997 to 2008, we assess the attractiveness of FDI…	;;Lei, Ming;;Zhao, Xinna;;Deng, Honghui;;Tan, Keah-Choon		;;Lei, M;;Zhao, XN;;Deng, HH;;Tan, KC			406							;;Mechanism design; Foreign direct investment; Malmquist index; Data;;envelopment analysis; Sustainable development	10.1016/j.dss.2012.10.053	Article		;;leiming@gsm.pku.edu.cn; zhaoxinna@pku.edu.cn; honghui.deng@unlv.edu;;;kctan@unlv.edu	418	;;;;				280BZ		;;FOREIGN DIRECT-INVESTMENT; DETERMINANTS; SPILLOVERS; EFFICIENCY;;;LOCATION; MARKETS; GROWTH; INDEX		DECIS SUPPORT SYST	Decis. Support Syst.	English		43		PO BOX 211, 1000 AE AMSTERDAM, NETHERLANDS	DEC	13	AMSTERDAM		J	ELSEVIER SCIENCE BV	2013		Deng, HH (reprint author), Univ Nevada Las Vegas, Lee Business Sch, Las Vegas, NV USA.	Computer Science; Operations Research & Management Science			0167-9236	DECISION SUPPORT SYSTEMS
A00329	Consumer ratings are crucial in creating and sustaining trust and trustworthiness in e-commerce markets. Thus, it is important to know whether online trading can survive bad mouthing among participants. We use controlled lab experiments to test whether market efficiency (measured by the percentage of successful trades) is affected by unfair negative ratings, and whether announcing the percentage …	;;Du, Ninghua;;Huang, Hailiang;;Li, Lingfang (Ivy)		;;Du, NH;;Huang, HL;;Li, LF			419							;;Trust and trustworthiness; Unfair rating; Reputation systems; Ambiguity;;;Experiment	10.1016/j.dss.2012.10.054	Article		;;ninghua.du@mail.shufe.edu.cn; hlhuang@shufe.edu.cn;;;lingfangivy.li@gmail.com	426	;;;;		;;Economics laboratory at SUFE; Shanghai Pujiang Program [10PGC040];;;Innovation Program of Shanghai Municipal Education Commission [1325055];;;Natural Science Foundation of China [70901049, 71001058]; Shanghai;;Social Science Foundation [2011BGL012]	;;We thank guest editors, anonymous referees, and Chun-lei Yang for;;valuable comments. Du and Li would like to thank the Economics;;laboratory at SUFE for support; Li would also like to thank Shanghai;;Pujiang Program (grant #: 10PGC040) Innovation Program of Shanghai;;Municipal Education Commission (grant # 1325055) for support; Huang;;would like to thank the Natural Science Foundation of China…	280BZ		;;FEEDBACK MECHANISMS; REPUTATION MECHANISMS; MARKETS; UNCERTAINTY;;;TRADERS; DESIGN; TRUST; EBAY		DECIS SUPPORT SYST	Decis. Support Syst.	English		27		PO BOX 211, 1000 AE AMSTERDAM, NETHERLANDS	DEC	8	AMSTERDAM		J	ELSEVIER SCIENCE BV	2013		Li, LF (reprint author), Shanghai Univ Finance & Econ, Sch Econ, Shanghai 200433, Peoples R China.	Computer Science; Operations Research & Management Science			0167-9236	DECISION SUPPORT SYSTEMS
[truncated: 69,415 more rows]
[truncated: 8 more columns]
